# Supplementary material for: Molecular Detection of Colistin Resistance mcr-1 Gene in Multidrug-Resistant Escherichia coli Isolated from Chicken
Source: MDPI journal article supplement (doi:10.3390/antibiotics11010097), 2022-01-13
Supplement: s1 [file s1]

**Supplementary File S1: Amplicons of *eaeA* gene sequence of *Escherichia coli* isolates (E1~E10).**

>*Escherichia coli*\_E1

CCAGGCTTCGTCACAGTTGCAGGCCTGGTTACAACATTATGGAACGGCAGAGGTTAATC  
TGCAGAGTGGTAATAACTTTGACGGTAGTTCACTGGACTTCTTATTACCGTTCTATGATT  
CCGAAAACATGCTGGCATTGTTGGTCAGGTCGGGGCGCGTTACATTGACTCCCGCTTTACG  
GCAAATTTAGGTGCTGGCCAGCGTTTTTTCCTTCCTGAAAATATGTTGGGCTATAACGTC  
TTCATTGATCAGGATTTTTCTGGTGATAATACCCGTTTAGGTATTGGTGGCG

>*Escherichia coli*\_E2

CCAGGCTTCGTCACAGTTGCAGGCCTGGTTACAACATTATGGAACGGCAGAGGTTAATC  
TGCAGAGTGGTAATAACTTTGACGGTAGTTCACTGGACTTCTTATTACCGTTCTATGATT  
CCGAAAACATGCTGGCATTGTTGGTCAGGTCGGGGCGCGTTACATTGACTCCCGCTTTACG  
GCAAATTTAGGTGCTGGCCAGCGTTTTTTCCTTCCTGAAAATATGTTGGGCTATAACGTC  
TTCATTGATCAGGATTTTTCTGGTGATAATACCCGTTTAGGTATTGGTGGCG

>*Escherichia coli*\_E3

CCAGGCTTCGTCACAGTTGCAGGCCTGGTTACAACATTATGGAACGGCAGAGGTTAATC  
TGCAGAGTGGTAATAACTTTGACGGTAGTTCACTGGACTTCTTATTACCGTTCTATGATT  
CCGAAAACATGCTGGCATTGTTGGTCAGGTCGGGGCGCGTTACATTGACTCCCGCTTTACG  
GCAAATTTAGGTGCTGGCCAGCGTTTTTTCCTTCCTGAAAATATGTTGGGCTATAACGTC  
TTCATTGATCAGGATTTTTCTGGTGATAATACCCGTTTAGGTATTGGTGGCG

>*Escherichia coli*\_E4

CCAGGCTTCGTCACAGTTGCAGGCCTGGTTACAACATTATGGAACGGCAGAGGTTAATC  
TGCAGAGTGGTAATAACTTTGACGGTAGTTCACTGGACTTCTTATTACCGTTCTATGATT  
CCGAAAACATGCTGGCATTGTTGGTCAGGTCGGGGCGCGTTACATTGACTCCCGCTTTACG  
GCAAATTTAGGTGCTGGCCAGCGTTTTTTCCTTCCTGAAAATATGTTGGGCTATAACGTC  
TTCATTGATCAGGATTTTTCTGGTGATAATACCCGTTTAGGTATTGGTGGCG

>*Escherichia coli*\_E5

CCAGGCTTCGTCACAGTTGCAGGCCTGGTTACAACATTATGGAACGGCAGAGGTTAATC  
TGCAGAGTGGTAATAACTTTGACGGTAGTTCACTGGACTTCTTATTACCGTTCTATGATT  
CCGAAAACATGCTGGCATTGTTGGTCAGGTCGGGGCGCGTTACATTGACTCCCGCTTTACG  
GCAAATTTAGGTGCTGGCCAGCGTTTTTTCCTTCCTGAAAATATGTTGGGCTATAACGTC  
TTCATTGATCAGGATTTTTCTGGTGATAATACCCGTTTAGGTATTGGTGGCG

>*Escherichia coli*\_E6

CCAGGCTTCGTCACAGTTGCAGGCCTGGTTACAACATTATGGAACGGCAGAGGTTAATC  
TGCAGAGTGGTAATAACTTTGACGGTAGTTCACTGGACTTCTTATTACCGTTCTATGATT  
CCGAAAACATGCTGGCATTGTTGGTCAGGTCGGGGCGCGTTACATTGACTCCCGCTTTACG  
GCAAATTTAGGTGCTGGCCAGCGTTTTTTCCTTCCTGAAAATATGTTGGGCTATAACGTC  
TTCATTGATCAGGATTTTTCTGGTGATAATACCCGTTTAGGTATTGGTGGCG

>*Escherichia coli*\_E7

CCAGGCTTCGTCACAGTTGCAGGCCTGGTTACAACATTATGGAACGGCAGAGGTTAATC  
TGCAGAGTGGTAATAACTTTGACGGTAGTTCACTGGACTTCTTATTACCGTTCTATGATT  
CCGAAAACATGCTGGCATTGTTGGTCAGGTCGGAGCGCGTTACATTGACTCCCGCTTTACG  
GCAAATTTAGGTGCGGGTCAGCGTTTTTTCCTTCCTGAAAATATGTTGGGCTATAACGTC  
TTCATTGATCAGGATTTTTCTGGTGATAATACCCGTTTAGGTATTGGTGGCG

>*Escherichia coli*\_E8

CCAGGCTTCGTCACAGTTGCAGGCCTGGTTACAACATTATGGAACGGCAGAGGTTAATC  
TGCAGAGTGGTAATAACTTTGACGGTAGTTCACTGGACTTCTTATTACCGTTCTATGATT  
CCGAAAACATGCTGGCATTGTTGGTCAGGTCGGGGCGCGTTACATTGACTCCCGCTTTACG  
GCAAATTTAGGTGCTGGCCAGCGTTTTTTCCTTCCTGAAAATATGTTGGGCTATAACGTC  
TTCATTGATCAGGATTTTTCTGGTGATAATACCCGTTTAGGTATTGGTGGCG

>*Escherichia coli*\_E9

CCAGGCTTCGTCACAGTTGCAGGCCTGGTTACAACATTATGGAACGGCAGAGGTTAATC  
TGCAGAGTGGTAATAACTTTGACGGTAGTTCACTGGACTTCTTATTACCGTTCTATGATT  
CCGAAAACATGCTGGCATTGTTGGTCAGGTCGGGGCGCGTTACATTGACTCCCGCTTTACG  
GCAAATTTAGGTGCTGGCCAGCGTTTTTTCCTTCCTGAAAATATGTTGGGCTATAACGTC  
TTCATTGATCAGGATTTTTCTGGTGATAATACCCGTTTAGGTATTGGTGGCG

>*Escherichia coli*\_E10

CCAGGCTTCGTCACAGTTGCAGGCCTGGTTACAACATTATGGAACGGCAGAGGTTAATC  
TGCAGAGTGGTAATAACTTTGACGGTAGTTCACTGGACTTCTTATTACCGTTCTATGATT  
CCGAAAACATGCTGGCATTGTTGGTCAGGTCGGGGCGCGTTACATTGACTCCCGCTTTACG  
GCAAATTTAGGTGCTGGCCAGCGTTTTTTCCTTCCTGAAAATATGTTGGGCTATAACGTC  
TTCATTGATCAGGATTTTTCTGGTGATAATACCCGTTTAGGTATTGGTGGCG
