# Supplementary material for: Molecular Detection of Colistin Resistance mcr-1 Gene in Multidrug-Resistant Escherichia coli Isolated from Chicken
Source: MDPI journal article supplement (doi:10.3390/antibiotics11010097), 2022-01-13
Supplement: s1 [file s1]

**Supplementary File S3:** A total of 52 MCR-1 proteins retrieved from NCBI database except *E. coli*.

>Aeromonas\_dhakensis\_MCR-1.1\_1

ATGATGCAGCATACTTCTGTGTGGTACCGACGCTCGGTCA GTCCGTTTGTTCTTGTGGCGAGTGTTGCCGTTTTCTTGAC  
CGCGACCGCCAATCTTACCTTTTTTGATAAAATCAGCCAAACCTATCCCATCGCGGACAATCTCGGCTTTGTGCTGACGA  
TCGCTGTCGTGCTCTTTGGCGCGATGCTACTGATCACCACGCTGTTATCATCGTATCGCTATGTGCTAAAGCCTGTGTTG  
ATTTTGCTATTAATCATGGGCGCGGTGACCAGTTATTTTACTGACACTTATGGCACGGTCTATGATACGACCATGCTCCA  
AAATGCCCTACAGACCGACCAAGCCGAGACCAAGGATCTATTAAACGCAGCGTTTATCATGCGTATCATTGGTTTGGGTG  
TGCTACCAAGTTTGCTTGTGGCTTTTGTTAAGGTGGATTATCCGACTTGGGGCAAGGGTTTGATGCGCCGATTGGGCTTG  
ATCGTGGCAAGTCTTGCGCTGATTTTACTGCCTGTGGTGGCGTTCAGCAGTCATTATGCCAGTTTCTTTCGCGTGCATAA  
GCCGCTGCGTAGCTATGTCAATCCGATCATGCCAATCTACTCGGTGGGTAAGCTTGCCAGTATTGAGTATAAAAAAGCCA  
GTGCGCCAAAAGATACCATTTATCACGCCAAAGACGCGGTACAAGCAACCAAGCCTGATATGCGTAAGCCACGCCTAGTG  
GTGTTTCGTCGTCGGTGAGACGGCACGCGCCGATCATGTCAGCTTCAATGGCTATGAGCGCGATACTTTCCACAGCTTGC  
CAAGATCGATGGCGTGACCAATTTTAGCAATGTCACATCGTGCGGCACATCGACGGCGTATTCTGTGCCGTGTATGTTCA  
GCTATCTGGGCGCGGATGAGTATGATGTCGATACCGCCAAATACCAAGAAAATGTGCTGGATACGCTGGATCGCTTGGGC  
GTAAGTATCTTGTGGCGTGATAATAATTCGGACTCAAAGGCGTGATGGATAAGCTGCCAAAAGCGCAATTTGCCGATTA  
TAAATCCGCGACCAACAACGCCATCTGCAACACCAATCCTTATAACGAATGCCGCGATGTCGGTATGCTCGTTGGCTTAG  
ATGACTTTGTGCTGCCAATAACGGCAAAGATATGCTGATCATGCTGCACCAAATGGGCAATCACGGGCCTGCGTATTTT  
AAGCGATATGATGAAAAGTTTGCCAAATTCACGCCAGTGTGTGAAGGTAATGAGCTTGCCAAGTGCGAACATCAGTCCTT

GATCAATGCTTATGACAATGCCTTGCTTGCCACCGATGATTTTCATCGCTCAAAGTATCCAGTGGCTGCAGACGCACAGCA  
ATGCCTATGATGTCTCAATGCTGTATGTCAGCGATCATGGCGAAAGTCTGGGTGAGAACGGTGTCTATCTACATGGTATG  
CCAAATGCCTTTGCACCAAAAGAACAGCGCAGTGTGCCTGCATTTTTCTGGACGGATAAGCAAACCTGGCATCACGCCAAT  
GGCAACCGATACCGTCCTGACCCATGACGCGATCACGCCGACATTATTAAAGCTGTTTGATGTCACCGCGGACAAAGTCA  
AAGACCGCACCGCATTTCATCCGCTGA

>Aeromonas\_veronii\_MCR-1.1\_2

ATGATGCAGCATACTTCTGTGTGGTACCGACGCTCGGTTCAGTCCGTTTGTTCCTGTGGCGAGTGTTGCCGTTTTCTTGAC  
CGCGACCGCCAATCTTACCTTTTTTGATAAAATCAGCCAAACCTATCCCATCGCGGACAATCTCGGCTTTGTGCTGACGA  
TCGCTGTCGTGCTCTTTGGCGCGATGCTACTGATCACCACGCTGTTATCATCGTATCGCTATGTGCTAAAGCCTGTGTTG  
ATTTTGCTATTAATCATGGGCGCGGTGACCAGTTATTTTACTGACACTTATGGCACGGTCTATGATACGACCATGCTCCA  
AAATGCCCTACAGACCGACCAAGCCGAGACCAAGGATCTATTAAACGCAGCGTTTATCATGCGTATCATTGGTTTGGGTG  
TGCTACCAAGTTTGCTTGTGGCTTTTGTTAAGGTGGATTATCCGACTTGGGGCAAGGGTTTGATGCGCCGATTGGGCTTG  
ATCGTGGCAAGTCTTGCGCTGATTTTACTGCCTGTGGTGGCGTTCAGCAGTCATTATGCCAGTTTCTTTCGCGTGCATAA  
GCCGCTGCGTAGCTATGTCAATCCGATCATGCCAATCTACTCGGTGGGTAAAGCTTGCCAGTATTGAGTATAAAAAAGCCA  
GTGCGCCAAAAGATACCATTTATCACGCCAAAGACGCGGTACAAGCAACCAAGCCTGATATGCGTAAGCCACGCCTAGTG  
GTGTTTCGTGTCGGTGAGACGGCACGCGCCGATCATGTCAGCTTCAATGGCTATGAGCGCGATACTTTCCACAGCTTGC  
CAAGATCGATGGCGTGACCAATTTTAGCAATGTCACATCGTGCGGCACATCGACGGCGTATTCTGTGCCGTGTATGTTCA  
GCTATCTGGGCGCGGATGAGTATGATGTCGATACCGCCAAATACCAAGAAAATGTGCTGGATACGCTGGATCGCTTGGGC

GTAAGTATCTTGTGGCGTGATAATAATTCGGACTCAAAAGGCGTGATGGATAAGCTGCCAAAAGCGCAATTTGCCGATTA  
TAAATCCGCGACCAACAACGCCATCTGCAACACCAATCCTTATAACGAATGCCGCGATGTCGGTATGCTCGTTGGCTTAG  
ATGACTTTTGTGCTGCCAATAACGGCAAAGATATGCTGATCATGCTGCACCAAATGGGCAATCACGGGCCTGCGTATTTT  
AAGCGATATGATGAAAAGTTTGCCAAATTCACGCCAGTGTGTGAAGGTAATGAGCTTGCCAAGTGCGAACATCAGTCCTT  
GATCAATGCTTATGACAATGCCTTGCTTGCCACCGATGATTTTCATCGCTCAAAGTATCCAGTGGCTGCAGACGCACAGCA  
ATGCCTATGATGTCTCAATGCTGTATGTCAGCGATCATGGCGAAAGTCTGGGTGAGAACGGTGTCTATCTACATGGTATG  
CCAAATGCCTTTGCACCAAAAGAACAGCGCAGTGTGCCTGCATTTTTCTGGACGGATAAGCAAACCTGGCATCACGCCAAT  
GGCAACCGATACCGTCCTGACCCATGACGCGATCACGCCGACATTATTAAAGCTGTTTGATGTCACCGCGGACAAAGTCA  
AAGACCGCACCGCATTCATCCGCTGA

>Salmonella\_enterica\_MCR-1\_3

CAAAATTGCAGTATGATTGCCGCAATTATCCCACCGTTTATTTTTTGAGTAGTTTCTCATGATGCAGCATACTTCTGTGT  
GGTACCGACGCTCGGTCAGTCCGTTTGTTCCTTGTGGCGAGTGTTGCCGTTTTCTTGACCGCGACCGCCAATCTTACCTTT  
TTTGATAAAATCAGCCAAACCTATCCCATCGCGGACAATCTCGGCTTTGTGCTGACGATCGCTGTCGTGCTCTTTGGCGC  
GATGCTACTGATCACCACGCTGTTATCATCGTATCGCTATGTGCTAAAGCCTGTGTTGATTTTGCTATTAATCATGGGCG  
CGGTGACCAGTTATTTTACTGACACTTATGGCACGGTCTATGATACGACCATGCTCCAAAATGCCCTACAGACCGACCAA  
GCCGAGACCAAGGATCTATTAAACGCAGCGTTTATCATGCGTATCATTGGTTTGGGTGTGCTACCAAGTTTGCTTGTGGC  
TTTTGTAAAGGTGGATTATCCGACTTGGGGCAAGGGTTTGATGCGCCGATTGGGCTTGATCGTGGCAAGTCTTGCGCTGA  
TTTTACTGCCTGTGGTGGCGTTCAGCAGTCATTATGCCAGTTTCTTTCGCGTGCATAAGCCGCTGCGTAGCTATGTCAAT

CCGATCATGCCAATCTACTCGGTGGGTAAGCTTGCCAGTATTGAGTATAAAAAAGCCAGTGCGCCAAAAGATACCATT  
TCACGCCAAAGACGCGGTACAAGCAACCAAGCCTGATATGCGTAAGCCACGCCTAGTGGTGTTTCGTCGTCGGTGAGACGG  
CACGCGCCGATCATGTCAGCTTCAATGGCTATGAGCGCGATACTTTCCACAGCTTGCCAAGATCGATGGCGTGACCAAT  
TTTAGCAATGTCACATCGTGCGGCACATCGACGGCGTATTCTGTGCCGTGTATGTTTCAGCTATCTGGGCGCGGATGAGTA  
TGATGTCGATACCGCCAAATACCAAGAAAATGTGCTGGATACGCTGGATCGCTTGGGCGTAAGTATCTTGTGGCGTGATA  
ATAATTCGGACTCAAAGGGCGTGATGGATAAGCTGCCAAAAGCGCAATTTGCCGATTATAAATCCGCGACCAACAACGCC  
ATCTGCAACACCAATCCTTATAACGAATGCCGCGATGTCGGTATGCTCGTTGGCTTAGATGACTTTGTCGCTGCCAATAA  
CGGCAAAGATATGCTGATCATGCTGCACCAAATGGGCAATCACGGGCCTGCGTATTTTAAGCGATATGATGAAAAGTTTG  
CCAAATTCACGCCAGTGTGTGAAGGTAATGAGCTTGCCAAGTGCGAACATCAGTCCTTGATCAATGCTTATGACAATGCC  
TTGCTTGCCACCGATGATTTTCATCGCTCAAAGTATCCAGTGGCTGCAGACGCACAGCAATGCCTATGATGTCTCAATGCT  
GTATGTCAGCGATCATGGCGAAAGTCTGGGTGAGAACGGTGTCTATCTACATGGTATGCCAAATGCCTTTGCACCAAAAG  
AACAGCGCAGTGTGCCTGCATTTTTCTGGACGGATAAGCAAACCTGGCATCACGCCAATGGCAACCGATACCGTCCTGACC  
CATGACGCGATCACGCCGACATTATTAAGCTGTTTGATGTCACCGCGGACAAAGTCAAAGACCGCACCGCATTCATCCG  
CTGATTTCTCCCTGTATTTTTTCCAAACCCACCGCACACTCCATTTCGTATTATGGGCCGGTGGGGTGGAG

>Salmonella\_enterica\_MCR-1\_4

AAAATTGCAGTATGATTGCCGCAATTATCCCACCGTTTATTTTTTGAGTAGTTTCTCATGATGCAGCATACTTCTGTGTG  
GTACCGACGCTCGGTACGTCCGTTTGTCTTGTGGCGAGTGTTGCCGTTTCTTGACCGCGACCGCCAATCTTACCTTTT  
TTGATAAAATCAGCCAAACCTATCCCATCGCGGACAATCTCGGCTTTGTGCTGACGATCGCTGTCGTGCTCTTTGGCGCG

ATGCTACTGATCACCACGCTGTTATCATCGTATCGCTATGTGCTAAAGCCTGTGTTGATTTTGCTATTAATCATGGGCGC  
GGTGACCAGTTATTTTACTGACACTTATGGCACGGTCTATGATACGACCATGCTCCAAAATGCCCTACAGACCGACCAAG  
CCGAGACCAAGGATCTATTAAACGCAGCGTTTATCATGCGTATCATTGGTTTGGGTGTGCTACCAAGTTTGCTTGTGGCT  
TTTGTTAAGGTGGATTATCCGACTTGGGGCAAGGGTTTGATGCGCCGATTGGGCTTGATCGTGGCAAGTCTTGCGCTGAT  
TTTACTGCCTGTGGTGGCGTTCAGCAGTCATTATGCCAGTTTCTTTTCGCGTGCATAAGCCGCTGCGTAGCTATGTCAATC  
CGATCATGCCAATCTACTCGGTGGGTAAAGCTTGCCAGTATTGAGTATAAAAAAGCCAGTGCGCCAAAAGATAACCATTTAT  
CACGCCAAAGACGCGGTACAAGCAACCAAGCCTGATATGCGTAAGCCACGCCTAGTGGTGTTCGTCGTCGGTGAGACGGC  
ACGCGCCGATCATGTCAGCTTCAATGGCTATGAGCGCGATACTTTCCACAGCTTGCCAAGATCGATGGCGTGACCAATT  
TTAGCAATGTCACATCGTGCGGCACATCGACGGCGTATTCTGTGCCGTGTATGTTTCACTATCTGGGCGCGGATGAGTAT  
GATGTCGATACCGCCAAATACCAAGAAAATGTGCTGGATACGCTGGATCGCTTGGGCGTAAGTATCTTGTGGCGTGATAA  
TAATTCGGACTCAAAAGGCGTGATGGATAAGCTGCCAAAAGCGCAATTTGCCGATTATAAATCCGCGACCAACAACGCCA  
TCTGCAACACCAATCCTTATAACGAATGCCGCGATGTCGGTATGCTCGTTGGCTTAGATGACTTTGTCGCTGCCAATAAC  
GGCAAAGATATGCTGATCATGCTGCACCAAATGGGCAATCACGGGCCTGCGTATTTTAAGCGATATGATGAAAAGTTTGC  
CAAATTCACGCCAGTGTGTGAAGGTAATGAGCTTGCCAAGTGCGAACATCAGTCCTTGATCAATGCTTATGACAATGCCT  
TGCTTGCCACCGATGATTTTCATCGCTCAAAGTATCCAGTGGCTGCAGACGCACAGCAATGCCTATGATGTCTCAATGCTG  
TATGTCAGCGATCATGGCGAAAGTCTGGGTGAGAACGGTGTCTATCTACATGGTATGCCAAATGCCTTTGCACCAAAAAGA  
ACAGCGCAGTGTGCCTGCATTTTTCTGGACGGATAAGCAAACCTGGCATCACGCCAATGGCAACCGATACCGTCCTGACCC  
ATGACGCGATCACGCCGACATTATTAAAGCTGTTTGATGTCACCGCGGACAAAGTCAAAGACCGCACCGCATTTCATCCGC  
TGATTTCTCCCTGTATTTTTTCCAAACCCACCGCACACTCCATTCGTATTATGGGCGGTGGGCTGGGC

>Klebsiella\_pneumoniae\_mcr1\_5

TTTCTGTATCGCATAATTTTTATATCAGATAAATTGTACTGGATTTCTTAAAAAATTGCAGTATAAATTGCCGCAATTAT  
CCCACCGTTTATTTTTGAGTAGTTTCTCATGATGCAGCATACTTCTGTGTGGTATCGACGCTCGGTCAGTCCGTTTGTT  
CTTGTGGCGAGTGTTGCCGTTTTCTTGACCGCGACCGCCAATCTTACCTTTTTTGATAAAATCAGCCAAACCTATCCCAT  
CGCGGACAATCTCGGCTTTGTGCTGACGATCGCTGTCGTGCTCTTTGGCGCGATGCTACTGATCACCACGCTGTTATCAT  
CGTATCGCTATGTGCTAAAGCCTGTGTTGATTTTGCTATTAATCATGGGCGCGGTGACCAGTTATTTTACTGACACTTAT  
GGCACGGTCTATGATACGACCATGCTCCAAAATGCCCTACAGACCGACCAAGCCGAGACCAAGGATCTATTAAACGCAGC  
GTTTATCATGCGTATCATTGGTTTGGGTGTGCTACCAAGTTTGCTTGTGGCTTTTGTTAAGGTGGATTATCCGACTTGGG  
GCAAGGGTTTGATGCGCCGATTGGGCTTGATCGTGGCAAGTCTTGCGCTGATTTTACTGCCTGTGGTGGCGTTCAGCAGT  
CATTATGCCAGTTTCTTTCGCGTGCATAAGCCGCTGCGTAGCTATGTCAATCCGATCATGCCAATCTACTCGGTGGGTAA  
GCTTGCCAGTATTGAGTATAAAAAAGCCAGTGCGCCAAAAGATACCATTTATCACGCCAAAGACGCGGTACAAGCAACCA  
AGCCTGATATGCGTAAGCCACGCCTAGTGGTGTTTCGTCGTCGGTGAGACGGCACGCGCCGATCATGTCAGCTTCAATGGC  
TATGAGCGCGATACTTTCCACAGCTTGCCAAGATCGATGGCGTGACCAATTTTAGCAATGTCACATCGTGCGGCACATC  
GACGGCGTATTCTGTGCCGTGTATGTTTCACTATCTGGGCGCGGATGAGTATGATGTCGATACCGCCAAATACCAAGAAA  
ATGTGCTGGATACGCTGGATCGCTTGGGCGTAAGTATCTTGTGGCGTGATAATAATTCGGACTCAAAGGCGTGATGGAT  
AAGCTGCCAAAAGCGCAATTTGCCGATTATAAATCCGCGACCAACAACGCCATCTGCAACACCAATCCTTATAACGAATG  
CCGCGATGTCGGTATGCTCGTTGGCTTAGATGACTTTGTGCTGCCAATAACGGCAAAGATATGCTGATCATGCTGCACC  
AAATGGGCAATCACGGGCCTGCGTATTTTAAGCGATATGATGAAAAGTTTGCCAAATTCACGCCAGTGTGTGAAGGTAAT

GAGCTTGCCAAGTGCGAACATCAGTCCTTGATCAATGCTTATGACAATGCCTTGCTTGCCACCGATGATTTTCATCGCTCA  
AAGTATCCAGTGGCTGCAGACGCACAGCAATGCCTATGATGTCTCAATGCTGTATGTCAGCGATCATGGCGAAAGTCTGG  
GTGAGAACGGTGTCTATCTACATGGTATGCCAAATGCCTTTGCACCAAAAGAACAGCGCAGTGTGCCTGCATTTTTCTGG  
ACGGATAAGCAAACCTGGCATCACGCCAATGGCAACCGATACCGTCCTGACCCATGACGCGATCACGCCGACATTATTA  
GCTGTTTGATGTCACCGCGGACAAAGTCAAAGACCGCACCGCATTTCATCCGCTGATTTCTCCCTGTATTTTTTCCAAACC  
CACCGCACACTCCATTTCGTATTATGGGCGGTGGGGTGGGGTTTGTTATGCCGTATTTATCAAATAAACGCCTAC

>Klebsiella\_pneumoniae\_MCR-1.2\_6

CGCATAATTTTTATATCAGATAAATTGTACTGGATTTCTTAAAAAATTGCAGTATAATTGCCGCAATTATCCCACCGTT  
TATTTTTTGAGTAGTTTCTCATGATGCTGCATACTTCTGTGTGGTACCGACGCTCGGTTCAGTCCGTTTGTTCTTGTTGGCG  
AGTGTTGCCGTTTTCTTGACCGCGACCGCCAATCTTACCTTTTTTGATAAAATCAGCCAAACCTATCCCATCGCGGACAA  
TCTCGGCTTTGTGCTGACGATCGCTGTCGTGCTCTTTGGCGCGATGCTACTGATCACCACGCTGTTATCATCGTATCGCT  
ATGTGCTAAAGCCTGTGTTGATTTTGCTATTAATCATGGGCGCGGTGACCAGTTATTTTACTGACACTTATGGCACGGTC  
TATGATACGACCATGCTCCAAAATGCCCTACAGACCGACCAAGCCGAGACCAAGGATCTATTAAACGCAGCGTTTATCAT  
GCGTATCATTGGTTTGGGTGTGCTACCAAGTTTGCTTGTGGCTTTTGTTAAGGTGGATTATCCGACTTGGGGCAAGGGTT  
TGATGCGCCGATTGGGCTTGATCGTGGCAAGTCTTGCGCTGATTTTACTGCCTGTGGTGGCGTTCAGCAGTCATTATGCC  
AGTTTCTTCGCGTGCATAAGCCGCTGCGTAGCTATGTCAATCCGATCATGCCAATCTACTCGGTGGGTAAGCTTGCCAG  
TATTGAGTATAAAAAAGCCAGTGCGCCAAAAGATAACATTTATCACGCCAAAGACGCGGTACAAGCAACCAAGCCTGATA  
TGCGTAAGCCACGCCTAGTGGTGTTTCGTTCGTTCGGTGAGACGGCACGCGCCGATCATGTCAGCTTCAATGGCTATGAGCGC

GATACTTTCCACAGCTTGCCAAGATCGATGGCGTGACCAATTTTAGCAATGTCACATCGTGCGGCACATCGACGGCGTA  
TTCTGTGCCGTGTATGTTTCAGCTATCTGGGCGCGGATGAGTATGATGTCGATACCGCCAAATACCAAGAAAATGTGCTGG  
ATACGCTGGATCGCTTGGGCGTAAGTATCTTGTGGCGTGATAATAATTCGGACTCAAAGGCGTGATGGATAAGCTGCCA  
AAAGCGCAATTTGCCGATTATAAATCCGCGACCAACAACGCCATCTGCAACACCAATCCTTATAACGAATGCCGCGATGT  
CGGTATGCTCGTTGGCTTAGATGACTTTGTCGCTGCCAATAACGGCAAAGATATGCTGATCATGCTGCACCAAATGGGCA  
ATCACGGGCCTGCGTATTTTAAGCGATATGATGAAAAGTTTGCCAAATTCACGCCAGTGTGTGAAGGTAATGAGCTTGCC  
AAGTGCGAACATCAGTCCTTGATCAATGCTTATGACAATGCCTTGCTTGCCACCGATGATTCATCGCTCAAAGTATCCA  
GTGGCTGCAGACGCACAGCAATGCCTATGATGTCTCAATGCTGTATGTCAGCGATCATGGCGAAAGTCTGGGTGAGAACG  
GTGTCTATCTACATGGTATGCCAAATGCCTTTGCACCAAAGAAGACAGCGCAGTGTGCCTGCATTTTTCTGGACGGATAAG  
CAAAGTGGCATCACGCCAATGGCAACCGATACCGTCCTGACCCATGACGCGATCACGCCGACATTATTAAGCTGTTTGA  
TGTCACCGCGGACAAAGTCAAAGACCGCACCGCATTATCCGCTGATTTCTCCCTGTATTTTTTCCAAACCCACCGCACA  
CTCCATTCGTATTATGGGCGGTGGGGTGGGGTTTGTATGCCGTATTTATCAAATAAACGCCTACT

>Uncultured\_bacterium\_MCR-1.1\_7

ATGATGCAGCATACTTCTGTGTGGTACCGACGCTCGGTCAGTCCGTTTGTTCCTTGTGGCGAGTGTTGCCGTTTTCTTGAC  
CGCGACCGCCAATCTTACCTTTTTTGATAAAATCAGCCAAACCTATCCCATCGCGGACAATCTCGGCTTTGTGCTGACGA  
TCGCTGTCGTGCTCTTTGGCGCGATGCTACTGATCACCACGCTGTTATCATCGTATCGCTATGTGCTAAAGCCTGTGTTG  
ATTTTGCTATTAATCATGGGCGCGGTGACCAGTTATTTTACTGACACTTATGGCACGGTCTATGATACGACCATGCTCCA  
AAATGCCCTACAGACCGACCAAGCCGAGACCAAGGATCTATTAAACGCAGCGTTTATCATGCGTATCATTGGTTTGGGTG



TGCTACCAAGTTTGCTTGTGGCTTTTGTTAAGGTGGATTATCCGACTTGGGGCAAGGGTTTGATGCGCCGATTGGGCTTG  
ATCGTGGCAAGTCTTGCGCTGATTTTACTGCCTGTGGTGGCGTTCAGCAGTCATTATGCCAGTTTCTTTCGCGTGCATAA  
GCCGCTGCGTAGCTATGTCAATCCGATCATGCCAATCTACTCGGTGGGTAAAGCTTGCCAGTATTGAGTATAAAAAAGCCA  
GTGCGCCAAAAGATAACCATTTATCACGCCAAAGACGCGGTACAAGCAACCAAGCCTGATATGCGTAAGCCACGCCTAGTG  
GTGTTTCGTCGTCGGTGAGACGGCACGCGCCGATCATGTCAGCTTCAATGGCTATGAGCGCGATACTTTCCACAGCTTGC  
CAAGATCGATGGCGTAACCAATTTTAGCAATGTCACATCGTGCGGCACATCGACGGCGTATTCTGTGCCGTGTATGTTCA  
GCTATCTGGGCGCGGATGAGTATGATGTCGATACCGCCAAATACCAAGAAAATGTGCTGGATACGCTGGATCGCTTGGGC  
GTAAGTATCTTGTGGCGTGATAATAATTCGGACTCAAAAGGCGTGATGGATAAGCTGCCAAAAGCGCAATTTGCCGATTA  
TAAATCCGCGACCAACAACGCCATCTGCAACACCAATCCTTATAACGAATGCCGCGATGTCGGTATGCTCGTTGGCTTAG  
ATGACTTTGTGCTGCCAATAACGGCAAAGATATGCTGATCATGCTGCACCAAATGGGCAATCACGGGCCTGCGTATTTT  
AAGCGATATGATGAAAAGTTTGCCAAATTCACGCCAGTGTGTGAAGGTAATGAGCTTGCCAAGTGCGAACATCAGTCCTT  
GATCAATGCTTATGACAATGCCTTGCTTGCCACCGATGATTTTCATCGCTCAAAGTATCCAGTGGCTGCAGACGCACAGCA  
ATGCCTATGATGTCTCAATGCTGTATGTCAGCGATCATGGCGAAAGTCTGGGTGAGAACGGTGTCTATCTACATGGTATG  
CCAAATGCCTTTGCACCAAAAGAACAGCGCAGTGTGCCTGCATTTTTCTGGACGGATAAGCAAACCTGGCATCACGCCAAT  
GGCAACCGATACCGTCCTGACCCATGACGCGATCACGCCGACATTATTAAAGCTGTTTGATGTCACCGCGGACAAAGTCA  
AAGACCGCACCGCATTTCATCCGCTGA

>Uncultured\_bacterium\_MCR-1.30\_8

ATGATGCAGCATACTTCTGTGTGGTACCGACGCTCGGTCACTCCGTTTGTTCTTGTGGCGAGTGTTGCCGTTTTCTTGAC

CGCGACCGCCAATCTTACCTTTTTTGATAAAATCAGCCAAACCTATCCCATCGCGGACAATCTCGGCTTTGTGCTGACGA  
TCGCTGTCGTGCTCTTTGGCGCGATGCTACTGATCACCACGCTGTTATCATCGTATCGCTATGTGCTAAAGCCTGTGTTG  
ATTTTGCTATTAATCATGGGCGCGGTGACCAGTTATTTTACTGACACTTATGGCACGGTCTATGATACGACCATGCTCCA  
AAATGCCCTACAGACCGACCAAGCCGAGACCAAGGATCTATTAACGCAGCGTTTATCATGCGTATCATTGGTTTGGGTG  
TGCTACCAAGTTTGCTTGTGGCTTTTGTTAAGGTGGATTATCCGACTTGGGGCAAGGGTTTGATGCGCCGATTGGGCTTG  
ATCGTGGCAAGTCTTGCGCTGATTTTACTGCCTGTGGTGGCGTTCAGCAGTCATTATGCCAGTTTCTTTCGCGTGCATAA  
GCCGCTGCGTAGCTATGTCAATCCGATCATGCCAATCTACTCGGTGGGTAAAGCTTGCCAGTATTGAGTATAAAAAAGCCA  
GTGCGCCAAAAGATACCATTTATCACGCCAAAGACGCGGTACAAGCAACCAAGCCTGATATGCGTAAGCCACGCCTAGTG  
GTGTTTCGTCGTCGGTGAGACGGCACGCGCCGATCATGTCAGCTTCAATGGCTATGAGCGCGATACTTTCCACAGCTTGC  
CAAGATCGATGGCGTGACCAATTTTAGCAATGTCACATCGTGCGGCACATCGACGGCGTATTCTGTGCCGTGTATGTTCA  
GCTATCTGGGCGCGGATGAGTATGATGTCGATACCGCCAAATACCAAGAAAATGTGCTGGATACGCTGGATCGCTTGGGC  
GTAAGTATCTTGTGGCGTGATAATAATTCGGACTCAAAGGCGTGATGGATAAGCTGCCAAAAGCGCAATTTGCCGATTA  
TAAATCCGCGACCAACAACGCCATCTGCAACACCAATCCTTATAACGAATGCCGCGATGTCGGTATGCTCGTTGGCTTAG  
ATGACTTTGTCGCTGCCAATAACGGCAAAGATATGCTGATCATGCTGCACCAAATGGGCAATCACGGGCCTGCGTATTTT  
AAGCGATATGATGAAAAGTTTGCCAAATTCACGCCAGTGTGTGAAGGTAATGAGCTTGCCAAGTGCGAACATCAGTCCTT  
GATCAATGCTTATGACAATGCCTTGCTTGCCACCGATGATTTTCATCGCTCAAAGTATCCAGTGGCTGCAGACGCACAGCA  
ATGCCTATGATGTCTCAATGCTGTATGTCAGCGATCATGGCGAAAGTCTGGGTGAGAACGATGTCTATCTACATGGTATG  
CCAAATGCCTTTGCACCAAAAGAACAGCGCAGTGTGCCTGCATTTTTCTGGACGGATAAGCAAACCTGGCATCACGCCAAT  
GGCAACCGATACCGTCCTGACCCATGACGCGATCACGCCGACATTATTAAAGCTGTTTGATGTCACCGCGGACAAAGTCA

AAGACCGCACCGCATTTCATCCGCTGA

>Uncultured\_bacterium\_MCR-1.29\_9

ATGATGCAGCATACTTCTGTGTGGTACCGACGCTCGGTCAGTCCGTTTGTTCTTGTGGCGAGTGTTGCCGTTTTCTTGAC  
CGCGACCGCCAATCTTACCTTTTTTGATAAAATCAGCCAAACCTATCCCATCGCGGACAATCTCGGCTTTGTGCTGACGA  
TCGCTGTCGTGCTCTTTGGCGCGATGCTACTGATCACCACGCTGTTATCATCGTATCGCTATGTGCTAAAGCCTGTGTTG  
ATTTTGCTATTAATCATGGGCGCGGTGACCAGTTATTTTACTGACACTTATGGCACGGTCTATGATACGACCATGCTCCA  
AAATGCCCTACAGACCGACCAAGCCGAGACCAAGGATCTATTAAACGCAGCGTTTATCATGCGTATCATTGGTTTGGGTG  
TGCTACCAAGTTTGCTTGTGGCTTTTGTTAAGGTGGATTATCCGACTTGGGGCAAGGGTTTGATGCGCCGATTGGGCTTG  
ATCGTGGCAAGTCTTGCGCTGATTTTACTGCCTGTGGTGGCGTTCAGCAGTCATTATGCCAGTTTCTTTCGCGTGCATAA  
GCCGCTGCGTAGCTATGTCAATCCGATCATGCCAATCTACTCGGTGGGTAAAGCTTGCCAGTATTGAGTATAAAAAAGCCA  
GTGCGCCAAAAGATACCATTATCACGCCAAAGACGCGGTACAAGCAACCAAGCCTGATATGCGTAAGCCACGCCTAGTG  
GTGTTGTCGTCGTCGGTGAGACGGCACGCGCCGATCATGTCAGCTTCAATGGCTATGAGCGCGATACTTTCCACAGCTTGC  
CAAGATCGATGGCGTGACCAATTTTAGCAATGTCACATCGTGCGGCACATCGACGGCGTATTCTGTGCCGTGTATGTTCA  
GCTATCTGGGCGCGGATGAGTATGATGTCGATACCGCCAAATACCAAGAAAATGTGCTGGATACGCTGGATCGCTTGGGC  
GTAAGTATCTTGTGGCGTGATAATAATTCGGACTCAAAGGCGTGATGGATAAGCTGCCAAAAGCGCAATTTGCCGATTA  
TAAATCCGCGACCAACAACGCCATCTGCAACACCAATCCTTATAACGAATGCCGCGATGTCGGTATGCTCGTTGGCTTAG  
ATGACTTTGTGCTGCCAATAACGGCAAAGATATGCTGATCATGCTGCACCAAATGGGCAATCACGGGTCTGCGTATTTT  
AAGCGATATGATGAAAAGTTTGCCAAATTCACGCCAGTGTGTGAAGGTAATGAGCTTGCCAAGTGCGAACATCAGTCCTT

GATCAATGCTTATGACAATGCCTTGCTTGCCACCGATGATTTTCATCGCTCAAAGTATCCAGTGGCTGCAGACGCACAGCA  
ATGCCTATGATGTCTCAATGCTGTATGTCAGCGATCATGGCGAAAGTCTGGGTGAGAACGGTGTCTATCTACATGGTATG  
CCAAATGCCTTTGCACCAAAAGAACAGCGCAGTGTGCCTGCATTTTTCTGGACGGATAAGCAAACCTGGCATCACGCCAAT  
GGCAACCGATAACCGTCCTGACCCATGACGCGATCACGCCGACATTATTAAAGCTGTTTGATGTCACCGCGGACAAAGTCA  
AAGACCGCACCGCATTTCATCCGCTGA

>Klebsiella\_pneumoniae\_MCR-1.15\_10

ATAATTTTTATATCAGATAAATTGTACTGGATTTCTTAAAAAATTGCAGTATAATTGCCGCAATTATCCCACCGTTTAT  
TTTTTGAGTAGTTTCTCTAGATGCAGCATACTTCTGTGTGGTACCGACGCTCGGTTCAGTCCGTTTGTTCCTTGTGGCGAGT  
GTTGCCGTTTTCTTGACCGCGACCGCCAATCTTACCTTTTTTGATAAAATCAGCCAAACCTATCCCATCGCGGACAATCT  
CGGCTTTGTGCTGACGATCGCTGTCGTGCTCTTTGGCGCGATGCTACTGATCACCACGCTGTTATCATCGTATCGCTATG  
TGCTAAAGCCTGTGTTGATTTTGCTATTAATCATGGGCGCGGTGACCAGTTATTTTACTGACACTTATGGCACGGTCTAT  
GATACGACCATGCTCCAAAATGCCCTACAGACCGACCAAGCCGAGACCAAGGATCTATTAAACGCAGCGTTTATCATGCG  
TATCATTGGTTTGGGTGTGCTACCAAGTTTGCTTGTGGCTTTTGTTAAGGTGGATTATCCGACTTGGGGCAAGGGTTTGA  
TGCGCCGATTGGGCTTGATCGTGGCAAGTCTTGCGCTGATTTTACTGCCTGTGGTGGCGTTCAGCAGTCATTATGCCAGT  
TTCTTTTCGCGTGCATAAGCCGCTGCGTAGCTATGTCAATCCGATCATGCCAATCTACTCGGTGGGTAAGCTTGCCAGTAT  
TGAGTATAAAAAAGCCAGTGCGCCAAAAGATAACCATTTATCACGCCAAAGACGCGGTACAAGCAACCAAGCCTGATATGC  
GTAAGCCACGCCTAGTGGTGTTCGTGTCGGTGAGACGGCACGCGCCGATCATGTCAGCTTCAATGGCTATGAGCGCGAT  
ACTTTCCACAGCTTGCCAAGATCGATGGCGTGACCAATTTTAGCAATGTCAAATCGTGCGGCACATCGACGGCGTATTC

TGTGCCGTGTATGTTTACGCTATCTGGGCGCGGATGAGTATGATGTGCGATACCGCCAAATACCAAGAAAATGTGCTGGATA  
CGCTGGATCGCTTGGGCGTAAGTATCTTGTGGCGTGATAATAATTCGGACTCAAAGGCGTGATGGATAAGCTGCCAAAA  
GCGCAATTTGCCGATTATAAATCCGCGACCAACAACGCCATCTGCAACACCAATCCTTATAACGAATGCCGCGATGTGCG  
TATGCTCGTTGGCTTAGATGACTTTGTGCGCTGCCAATAACGGCAAAGATATGCTGATCATGCTGCACCAAATGGGCAATC  
ACGGGCCTGCGTATTTTAAGCGATATGATGAAAAGTTTGCCAAATTCACGCCAGTGTGTGAAGGTAATGAGCTTGCCAAG  
TGCGAACATCAGTCCTTGATCAATGCTTATGACAATGCCTTGCTTGCCACCGATGATTTTCATCGCTCAAAGTATCCAGTG  
GCTGCAGACGCACAGCAATGCCTATGATGTCTCAATGCTGTATGTCAGCGATCATGGCGAAAGTCTGGGTGAGAACGGTG  
TCTATCTACATGGTATGCCAAATGCCTTTGCACCAAAGAAGACAGCGCAGTGTGCCTGCATTTTTCTGGACGGATAAGCAA  
ACTGGCATCACGCCAATGGCAACCGATACCGTCCTGACCCATGACGCGATCACGCCGACATTATTAAGCTGTTTGATGT  
CACCGCGGACAAAGTCAAAGACCGCACCGCATTCATCCGCTGATTTCTCCCTGTATTTTTTCCAAACCCACCGCACACTC  
CATTCGTATTATGGGCGGTGGGGTGGGGTTTGTTATGCCGTATTTATCAAATAAACGCCTACT

>Klebsiella\_pneumoniae\_mcr-1.15\_11

CAAAAAGCCATGATTGAATTGCTGGATTCACATATATTGCGGTCAATTACGCCAGACCGTGGTAAAGAATTTGCCCAACA  
TCGTTTGGTAACAGAAGCACTGGGTGTAGAATTTTACTTCCCCGAGCCGCATCAACCGTGGACACGGGGAACGAATGAAA  
ATACAAATGGGTTACTTCGTGAATACTTTCCGAAGCACCAAGACATCAATCAGTGGAGCGAAGTTGATATTCAACAGGTG  
ATCAATAAACTGAATTTACGACCACGTAAATGTTTAGGTTGGAAAACACCTTATGAAGTTTACTTCAAAAAATCGTTGCA  
CTTGGTTTGACAATTCAAGATACAAATTATAAATACTCTCAAGTGTATATTCAGTATGGGATTGCGCAATGATTGCCTAA  
TAAAATTTCTGAAATATTTCTGTATCGCATAATTTTTTATATCAGATAAATTGTACTGGATTTCTTAAAAAATTGCAGTA

TAATTGCCGCAATTATCCCACCGTTTATTTTTTGAGTAGTTTCTCTAGATGCAGCATACTTCTGTGTGGTACCGACGCTC  
GGTCAGTCCGTTTGTTCCTGTGGCGAGTGTTGCCGTTTTCTTGACCGCGACCGCCAATCTTACCTTTTTTGATAAAATCA  
GCCAAACCTATCCCATCGCGGACAATCTCGGCTTTGTGCTGACGATCGCTGTCGTGCTCTTTGGCGCGATGCTACTGATC  
ACCACGCTGTTATCATCGTATCGCTATGTGCTAAAGCCTGTGTTGATTTTGCTATTAATCATGGGCGCGGTGACCAGTTA  
TTTTACTGACACTTATGGCACGGTCTATGATACGACCATGCTCCAAAATGCCCTACAGACCGACCAAGCCGAGACCAAGG  
ATCTATTAAACGCAGCGTTTATCATGCGTATCATTGGTTTGGGTGTGCTACCAAGTTTGCTTGTGGCTTTTGTTAAGGTG  
GATTATCCGACTTGGGGCAAGGGTTTGATGCGCCGATTGGGCTTGATCGTGGCAAGTCTTGCGCTGATTTTACTGCCTGT  
GGTGGCGTTCAGCAGTCATTATGCCAGTTTCTTTCGCGTGCATAAGCCGCTGCGTAGCTATGTCAATCCGATCATGCCAA  
TCTACTCGGTGGGTAAGCTTGCCAGTATTGAGTATAAAAAAGCCAGTGCGCCAAAAGATAACCATTTATCACGCCAAAGAC  
GCGGTACAAGCAACCAAGCCTGATATGCGTAAGCCACGCCTAGTGGTGTTCGTCGTCGGTGAGACGGCACGCGCCGATCA  
TGTCAGCTTCAATGGCTATGAGCGCGATACTTTCCACAGCTTGCCAAGATCGATGGCGTGACCAATTTTAGCAATGTCA  
AATCGTGCGGCACATCGACGGCGTATTCTGTGCCGTGTATGTTTCAGCTATCTGGGCGCGGATGAGTATGATGTCGATACC  
GCCAAATACCAAGAAAATGTGCTGGATACGCTGGATCGCTTGGGCGTAAGTATCTTGTGGCGTGATAATAATTCGGACTC  
AAAAGGCGTGATGGATAAGCTGCCAAAAGCGCAATTTGCCGATTATAAATCCGCGACCAACAACGCCATCTGCAACACCA  
ATCCTTATAACGAATGCCGCGATGTCGGTATGCTCGTTGGCTTAGATGACTTTGTCGCTGCCAATAACGGCAAAGATATG  
CTGATCATGCTGCACCAAATGGGCAATCACGGGCCTGCGTATTTAAGCGATATGATGAAAAGTTTGCCAATTCACGCC  
AGTGTGTGAAGGTAATGAGCTTGCCAAGTGCGAACATCAGTCCTTGATCAATGCTTATGACAATGCCTTGCTTGCCACCG  
ATGATTTTCATCGCTCAAAGTATCCAGTGGCTGCAGACGCACAGCAATGCCTATGATGTCTCAATGCTGTATGTCAGCGAT  
CATGGCGAAAGTCTGGGTGAGAACGGTGTCTATCTACATGGTATGCCAAATGCCTTTGCACCAAAAAGAACAGCGCAGTGT

GCCTGCATTTTTCTGGACGGATAAGCAAACCTGGCATCACGCCAATGGCAACCGATACCGTCCTGACCCATGACGCGATCA  
CGCCGACATTATTAAGCTGTTTGATGTCACCGCGGACAAAGTCAAAGACCGCACCGCATTCATCCGCTGATTTCTCCCT  
GTATTTTTTCCAAACCCACCGCACACTCCATTTCGTATTATGGGCGGTGGGGTGGGGTTTGTTATGCCGTATTTATCAAAT  
AAACGCCTACTTGCTGAGATGAGTATCGCTCTTGTCATGGCGATCGTTGCCACGCTGACCCTTGAGCACAGTCAGATTGA  
TCTGATGGTCGCTGATTGGTTTTATCTGGGTATGGGGCATTGGATGGTTGCCAAGCAAGCTTTTTTGCCAGATTTGCTAC  
TGTATTCTGGACTAAAAAAGCTGCTGATGGCGATGCTGATCTACTTGCTGGTTGCGACCATTGCGGTGCTTATCATGAG  
AAAAAGGGCAATGCTATCACTGCCAAGTGGCTTGTCACAGTGACAAAATTCGCGTGCGTGAGCTTGCGTATCTGGTGCT  
GACTTTGATCCTAGTGCCGACAGTTGTCGCGTCATTGAAGGCATATACTCATGTGGTCTGCCCTGTGCATTTGACGATTT  
TTGATGGTACGCTGCCGTATTTGCCGATGCTTGATAGTATGCGTAACACCATTCCCTGATAAGTGCTTTCCTGCGGGCGCAT  
GCCAGTAGCGGATTTGCGCTGTTTGCTTTGCGTTTGCGCCAAGTTTGCGCCGCCGTCGTGGTGCGATCATCATCGTGGT  
GATGGCATTGGGCTGGGCGATGGGCTGCTATAAGATGATTATTGGCGATCATTTTTTGAGCCATACGGTGGTGTCGATGA  
TGCTTGCGTGCGGCGATGTCGGCAGGGCTTGCGTGGGTGTTTTTAAGAAGGGTGAACAAGTTTAATCGGCTGAATTTACA  
ATCCAAGTGCAACAAAAAAGAAGTACTCATCAACTAGAATATAATTTTGTTTCCACACAAAAACCATTTCCAAATGATG  
AGTACTTCCTACCGACATCTTACAATAAACGAGCGAGAAAAGATAATGATTTTACTCGCACAGGGCAAAAAACAAGCAGA  
AATTGCCAAAGCACTGGGACGTAGCTCCAGCACCATTTCTCGCGAGCTGAAACGACACGCTCTAGAAAGCTACAGTGCAA  
CGAACGCACAAAACAGCTATTTGAAGCATCGTCAAAATAGCAAAGCACAGCGCAAATTAGAGCAGCCTGAATATTTCAAT  
TTGGTGCAAGAAAAGTTTCTGACAGAAAACCTGGTCGCCCCGAACAAATCAGCGCACGATTAAAATTGGAAAAATCTGAATT  
ATCCATTAGTTATTCAACCATTTATCGTGGTATTTATTTAGGGTTGTTTGATATAGGCGAACGCAAAGCCAGTCGCAAAC  
TGCGCCACAAAGGCAAAACACGGCATACAAAAAATCATCATGAAAAACGTGGCAAATTCAGATATCCAACCATTTGAAC

GACCGTCCCATTTTCGGCGCAAAATCGCAGTCGCTTTGGACATTGGGAAGCCGATACCGTACTGGGTAAAGCGGGTGGAGC  
TTGTTTGCTGACGCTGACGGAACGCAAAAGTCGTTTTGAGTTGGTGAAGAAAATTCCTGCCAAAAAAGCCGAAGCAGTCC  
AAAAAGCCATGATTGAATTGCTGGATTCACATATATTGCGGTCAATTACGCCAGACCGTGGTAAAGAATTTGCCCAACAT  
CGTTTGGTAACAGAAGCACTGGGTGTAGAATTTTACTTCCCCGAG

>Klebsiella\_pneumoniae\_MCR-1.14\_12

CGCATAATTTTTATATCAGATAAATTGTACTGGATTTCTTAAAAAATTGCAGTATAATTGCCGTAATTATCCCACCGTT  
TATTTTTTGAGTAGTTTCTCATGATGCAGCATACTTCTGTGTGGTACCGACGCTCGGTCAGTCCGTTTGTTCTTGTGGCG  
AGTGTTGCCGTTTTCTTGACCGCGACCGCCAATCTTACCTTTTTTGATAAGGTCAGCCAAACCTATCCCATCGCGGACAA  
TCTCGGCTTTGTGCTGACGATCGCTGTCGTGCTCTTTGGCGCGATGCTACTGATCACCACGCTGTTATCATCGTATCGCT  
ATGTGCTAAAGCCTGTGTTGATTTTGCTATTAATCATGGGCGCGGTGACCAGTTATTTTACTGACACTTATGGCACGGTC  
TATGATACGACCATGCTCCAAAATGCCCTACAGACCGACCAAGCCGAGACCAAGGATCTATTAAACGCAGCGTTTATCAT  
GCGTATCATTGGTTTGGGTGTGCTACCAAGTTTGCTTGTGGCTTTTGTTAAGGTGGATTATCCGACTTGGGGCAAGGGTT  
TGATGCGCCGATTGGGCTTGATCGTGGCAAGTCTTGCGCTGATTTTACTGCCTGTGGTGGCGTTCAGCAGTCATTATGCC  
AGTTTCTTTCGCGTGCATAAGCCGCTGCGTAGCTATGTCAATCCGATCATACCAATCTACTCGGTGGGTAAAGCTTGCCAG  
TATTGAGTATAAAAAAGCCAGTGCGCCAAAAGATACCATTTATCACGCCAAAGACGCGGTACAAGCAACCAAGCCTGATA  
TGCGTAAGCCACGCCTAGTGGTGTTCGTGTCGGTGAGACGGCACGCGCCGATCATGTCAGCTTCAATGGCTATGAGCGC  
GATACTTTCCACAGCTTGCCAAGATCGATGGCGTGACCAATTTTAGCAATGTCACATCGTGCGGCACATCGACGGCGTA  
TTCTGTGCCGTGTATGTTTACGCTATCTGGGCGCGGATGAGTATGATGTCGATACCGCCAAATACCAAGAAAATGTGCTGG



ATACGCTGGATCGCTTGGGCGTAAGTATCTTGTGGCGTGATAATAATTCGGACTCAAAGGCGTGATGGATAAGCTGCCA  
AAAGCGCAATTTGCCGATTATAAATCCGCGACCAACAACGCCATCTGCAACACCAATCCTTATAACGAATGCCGCGATGT  
CGGTATGCTCGTTGGCTTAGATGACTTTGTGCTGCGTGCCAATAACGGCAAAGATATGCTGATCATGCTGCACCAAATGGGCA  
ATCACGGGCCTGCGTATTTTAAGCGATATGATGAAAAGTTTGCCAAATTCACGCCAGTGTGTGAAGGTAATGAGCTTGCC  
AAGTGCGAACATCAGTCCTTGATCAATGCTTATGACAATGCCTTGCTTGCCACCGATGATTCATCGCTCAAAGTATCCA  
GTGGCTGCAGACGCACAGCAATGCCTATGATGTCTCAATGCTGTATGTCAGCGATCATGGCGAAAGTCTGGGTGAGAACG  
GTGTCTATCTACATGGTATGCCAAATGCCTTTGCACCAAAGAAGACAGCGCAGTGTGCCTGCATTTTTCTGGACGGATAAG  
CAAAGTGGCATCACGCCAATGGCAACCGATACCGTCCTGACCCATGACGCGATCACGCCGACATTATTAAAGCTGTTTGA  
TGTCACCGCGGACAAAGTCAAAGACCGCACCGCATTTCATCCGCTGATTTCTCCCTGTATTTTTTCCAAACCCACCGCACA  
CTCCATTTCGTATTATGGGCGGTGGGGTGGGGTTTGTATGCCGTATTTATCAAATAAACGCCTACT

>Enterobacter\_cloacae\_MCR-1\_13

TGATGCAGCATACTTCTGTGAGGTACCGACGCTCGGTCAGTCCGTTTGTTCCTTGTGGCGAGTGTTGCCGTTTTCTTGACC  
GCGACCGCCAATCTTACCTTTTTTGATAAAATCAGCCAAACCTATCCCATCGCGGACAATCTCGGCTTTGTGCTGACGAT  
CGCTGTCGTGCTCTTTGGCGCGATGCTACTGATCACCACGCTGTTATCATCGTATCGCTATGTGCTAAAGCCTGTGTTGA  
TTTTGCTATTAATCATGGGCGCGGTGACCAGTTATTTTACTGACACTTATGGCACGGTCTATGATACGACCATGCTCCAA  
AATGCCCTACAGACCGACCAAGCCGAGACCAAGGATCTATTAAACGCAGCGTTTATCATGCGTATCATTGGTTTGGGTGT  
GCTACCAAGTTTGCTTGTGGCTTTTGTAAAGGTGGATTATCCGACTTGGGGCAAGGGTTTGATGCGCCGATTGGGCTTGA  
TCGTGGCAAGTCTTGCGCTGATTTTACTGCCTGTGGTGGCGTTCAGCAGTCATTATGCCAGTTTCTTTCGCGTGCATAAG  
CCGCTGCGTAGCTATGTCAATCCGATCATGCCAATCTACTCGGTGGGTAAGCTTGCCAGTATTGAGTATAAAAAAGCCAG

TGCGCCAAAAGATACCATTTATCACGCCAAAAGACGCGGTACAGCAACCAAGCCTGATATGCGTAAGCCACGCCTAGTGG  
TGTTTCGTCGTCGGTGAGACGGCACGCGCCGATCATGTCAGCTTCAATGGCTATGAGCGCGATACTTTCCACAGCTTGCC  
AAGATCGATGGCGTGACCAATTTTAGCAATGTCACATCGTGCGGCACATCGACGGCGTATTCTGTGCCGTGTATGTTTCA  
CTATCTGGGCGCGGATGAGTATGATGTCGATACCGCCAAATACCAAGAAAATGTGCTGGATACGCTGGATCGCTTGGGCG  
TAAGTATCTTGTGGCGTGATAATAATTCGGACTCAAAGGCGTGATGGATAAGCTGCCAAAAGCGCAATTTGCCGATTAT  
AAATCCGCGACCAACAACGCCATCTGCAACACCAATCCTTATAACGAATGCCGCGATGTCGGTATGCTCGTTGGCTTAGA  
TGACTTTGTCGCTGCCAATAACGGCAAAGATATGCTGATCATGCTGCACCAAATGGGCAATCACGGGCCTGCGTATTTTA  
AGCGATATGATGAAAAGTTTGCCAAATTCACGCCAGTGTGTGAAGGTAATGAGCTTGCCAAGTGCGAACATCAGTCCTTG  
ATCAATGCTTATGACAATGCCTTGCTTGCCACCGATGATTTTCATCGCTCAAAGTATCCAGTGGCTGCAGACGCACAGCAA  
TGCCTATGATGTCTCAATGCTGTATGTCAGCGATCATGGCGAAAGTCTGGGTGAGAACGGTGTCTATCTACATGGTATGC  
CAAATGCCTTTGCACCAAAAGAACAGCGCAGTGTGCCTGCATTTTTCTGGACGGATAAGCAAACCTGGCATCACGCCAATG  
GCAACCGATACCGTCCTGACCCATGACGCGATCACGCCGACATTATTAAAGCTGTTTGATG

>Klebsiella\_pneumoniae\_MCR-1\_14

TGATGCAGCATACTTCTGTGAGGTACCGACGCTCGGTCAGTCCGTTTGTCTTGTGGCGAGTGTTGCCGTTTTCTTGACC  
GCGACCGCCAATCTTACCTTTTTTGATAAAATCAGCCAAACCTATCCCATCGCGGACAATCTCGGCTTTGTGCTGACGAT  
CGCTGTCGTGCTCTTTGGCGCGATGCTACTGATCACCACGCTGTTATCATCGTATCGCTATGTGCTAAAGCCTGTGTTGA  
TTTTGCTATTAATCATGGGCGCGGTGACCAGTTATTTTACTGACACTTATGGCACGGTCTATGATACGACCATGCTCCAA  
AATGCCCTACAGACCGACCAAGCCGAGACCAAGGATCTATTAAACGCAGCGTTTATCATGCGTATCATTGGTTTGGGTGT  
GCTACCAAGTTTGCTTGTGGCTTTTGTTAAGGTGGATTATCCGACTTGGGGCAAGGGTTTGATGCGCCGATTGGGCTTGA

TCGTGGCAAGTCTTGCGCTGATTTTACTGCCTGTGGTGGCGTTCAGCAGTCATTATGCCAGTTTCTTTCGCGTGCATAAG  
CCGCTGCGTAGCTATGTCAATCCGATCATGCCAATCTACTCGGTGGGTAAAGCTTGCCAGTATTGAGTATAAAAAAGCCAG  
TGCGCCAAAAGATAACCATTTATCACGCCAAAAGACGCGGTACAGCAACCAAGCCTGATATGCGTAAGCCACGCCTAGTGG  
TGTTTCGTTCGTTCGGTGAGACGGCACGCGCCGATCATGTCAGCTTCAATGGCTATGAGCGCGATACTTTCCACAGCTTGCC  
AAGATCGATGGCGTGACCAATTTTAGCAATGTCACATCGTGCGGCACATCGACGGCGTATTCTGTGCCGTGTATGTTTCAG  
CTATCTGGGCGCGGATGAGTATGATGTCGATACCGCCAAATACCAAGAAAATGTGCTGGATACGCTGGATCGCTTGGGCG  
TAAGTATCTTGTGGCGTGATAATAATTCGGACTCAAAGGCGTGATGGATAAGCTGCCAAAAGCGCAATTTGCCGATTAT  
AAATCCGCGACCAACAACGCCATCTGCAACACCAATCCTTATAACGAATGCCGCGATGTCGGTATGCTCGTTGGCTTAGA  
TGACTTTGTCGCTGCCAATAACGGCAAAGATATGCTGATCATGCTGCACCAAATGGGCAATCACGGGCCTGCGTATTTTA  
AGCGATATGATGAAAAGTTTGCCAAATTCACGCCAGTGTGTGAAGGTAATGAGCTTGCCAAGTGCGAACATCAGTCCTTG  
ATCAATGCTTATGACAATGCCTTGCTTGCCACCGATGATTTTCATCGCTCAAAGTATCCAGTGGCTGCAGACGCACAGCAA  
TGCCTATGATGTCTCAATGCTGTATGTCAGCGATCATGGCGAAAGTCTGGGTGAGAACGGTGTCTATCTACATGGTATGC  
CAAATGCCTTTGCACCAAAGAAGACAGCGCAGTGTGCCTGCATTTTTCTGGACGGATAAGCAAACCTGGCATCACGCCAATG  
GCAACCGATACCGTCCTGACCCATGACGCGATCACGCCGACATTATTAAGCTGTTTGATG

>Escherichia\_albertii\_mcr-1\_15

CGGTCAGTCCGTTTGTCTTGTGGCGAGTGTTGCCGTTTTCTTGACCGCGACCGCCAATCTTACCTTTTTTGATAAAATC  
AGCCAAACCTATCCCATCGCGGACAATCTCGGCTTTGTGCTGACGATCGCTGTCGTGCTCTTTGGCGCGATGCTACTGAT  
CACCACGCTGTTATCATCGTATCGCTATGTGCTAAAGCCTGTGTTGATTTTGCTATTAATCATGGGCGCGGTGACCAGTT  
ATTTTACTGACACTTATGGCACGGTCTATGATACGACCATGCTCCAAAATGCCCTACAGACCGACCAAGCCGAGACCAAG

GATCTATTAAACGCAGCGTTTATCATGCGTATCATTGGTTTGGGTGTGCTACCAAGTTTGCTTGTGGCTTTTGTAAAGGT  
GGATTATCCGACTTGGGGCAAGGGTTTGATGCGCCGATTGGGCTTGATCGTGCGCAAGTCTTGCGCTGATTTTACTGCCTG  
TGGTGGCGTTCAGCAGTCATTATGCCAGTTTCTTTCGCGTGCATAAGCCGCTGCGTAGCTATGTCAATCCGATCATGCCA  
ATCTACTCGGTGGGTAAGCTTGCCAGTATTGAGTATAAAAAAGCCAGTGCGCCAAAAGATAACCATTTATCACGCCAAAGA  
CGCGGTACAAGCAACCAAGCCTGATATGCGTAAGCCACGCCTAGTGGTGTTTCGTTCGTTCGGTGAGACGGCACGCGCCGATC  
ATGTCAGCTTCAATGGCTATGAGCGCGATACTTTCCACAGCTTGCCAAGATCGATGGCGTGACCAATTTTAGCAATGTC  
ACATCGTGCGGCACATCGACGGCGTATTCTGTGCCGTGTATGTTTCAGCTATCTGGGCGCGGATGAGTATGATGTCGATAC  
CGCCAAATACCAAGAAAATGTGCTGGATACGCTGGATCGCTTGGGCGTAAGTATCTTGTGGCGTGATAATAATTCGGACT  
CAAAAGGCGTGATGGATAAGCTGCCAAAAGCGCAATTTGCCGATTATAAATCCGCGACCAACAACGCCATCTGCAACACC  
AATCCTTATAACGAATGCCGCGATGTCGGTATGCTCGTTGGCTTAGATGACTTTGTTCGCTGCCAATAACGGCAAAGATAT  
GCTGATCATGCTGCACCAAATGGGCAATCACGGGCCTGCGTATTTTAAGCGATATGATGAAAAGTTTGCCAAATTCACGC  
CAGTGTGTGAAGGTAATGAGCTTGCCAAGTGCGAACATCAGTCCTTGATCAATGCTTATGACAATGCCTTGCTTGCCACC  
GATGATTTTCATCGCTCAAAGTATCCAGTGGCTGCAGACGCACAGCAATGCCTATGATGTCTCAATGCTGTATGTCAGCGA  
TCATGGCGAAAGTCTGGGTGAGAACGGTGTCTATCTACATGGTATGCCAAATGCCTTTGCACCAAAGAAGAACAGCGCAGTG  
TGCCTGCATTTTTCTGGACGGATAAGCAAACCTGGCATCACGCCAATGGCAACCGATACCGTCCTGACCCATGACGCGATC  
ACGCCGACATTATTAAAGCTGTT

>Escherichia\_albertii\_mcr-1\_16

CGGTCAGTCCGTTTGTTCCTTGTGGCGAGTGTTGCCGTTTCTTGACCGCGACCGCCAATCTTACCTTTTTTGATAAAATC  
AGCCAAACCTATCCCATCGCGGACAATCTCGGCTTTGTGCTGACGATCGCTGTTCGTGCTCTTTGGCGCGATGCTACTGAT

CACCACGCTGTTATCATCGTATCGCTATGTGCTAAAGCCTGTGTTGATTTTGCTATTAATCATGGGCGCGGTGACCAGTT  
ATTTTACTGACACTTATGGCACGGTCTATGATACGACCATGCTCCAAAATGCCCTACAGACCGACCAAGCCGAGACCAAG  
GATCTATTAACGCAGCGTTTATCATGCGTATCATTGGTTTGGGTGTGCTACCAAGTTTGCTTGTGGCTTTTGTTAAGGT  
GGATTATCCGACTTGGGGCAAGGGTTTGATGCGCCGATTGGGCTTGATCGTGGAAGTCTTGCGCTGATTTTACTGCCTG  
TGGTGGCGTTCAGCAGTCATTATGCCAGTTTCTTTCGCGTGCATAAGCCGCTGCGTAGCTATGTCAATCCGATCATGCCA  
ATCTACTCGGTGGGTAAGCTTGCCAGTATTGAGTATAAAAAAGCCAGTGCGCCAAAAGATACCATTTATCACGCCAAAGA  
CGCGGTACAAGCAACCAAGCCTGATATGCGTAAGCCACGCCTAGTGGTGTTTCGTTCGTTCGGTGAGACGGCACGCGCCGATC  
ATGTCAGCTTCAATGGCTATGAGCGCGATACTTCCCACAGCTTGCCAAGATCGATGGCGTGACCAATTTTAGCAATGTC  
ACATCGTGCGGCACATCGACGGCGTATTCTGTGCCGTGTATGTTTCAGCTATCTGGGCGCGGATGAGTATGATGTCGATAC  
CGCCAAATACCAAGAAAATGTGCTGGATACGCTGGATCGCTTGGGCGTAAGTATCTTGTGGCGTGATAATAATTCGGACT  
CAAAAGGCGTGATGGATAAGCTGCCAAAAGCGCAATTTGCCGATTATAAATCCGCGACCAACAACGCCATCTGCAACACC  
AATCCTTATAACGAATGCCGCGATGTCGGTATGCTCGTTGGCTTAGATGACTTTGTCGCTGCCAATAACGGCAAAGATAT  
GCTGATCATGCTGCACCAAATGGGCAATCACGGGCCTGCGTATTTTAAGCGATATGATGAAAAGTTTGCCAAATTCACGC  
CAGTGTGTGAAGGTAATGAGCTTGCCAAGTGCGAACATCAGTCCTTGATCAATGCTTATGACAATGCCTTGCTTGCCACC  
GATGATTTTCATCGCTCAAAGTATCCAGTGGCTGCAGACGCACAGCAATGCCTATGATGTCTCAATGCTGTATGTCAGCGA  
TCATGGCGAAAGTCTGGGTGAGAACGGTGTCTATCTACATGGTATGCCAAATGCCTTTGCACCAAAGAAGACAGCGCAGTG  
TGCCTGCATTTTTCTGGACGGATAAGCAAACCTGGCATCACGCCAATGGCAACCGATACCGTCCTGACCCATGACGCGATC  
ACGCCGACATTATTAAAGCTGTT

>Escherichia\_albertii\_mcr-1\_17

CGGTCAGTCCGTTTGTCTTGTGGCGAGTGTTGCCGTTTTCTTGACCGCGACCGCCAATCTTACCTTTTTTGATAAAATC  
AGCCAAACCTATCCCATCGCGGACAATCTCGGCTTTGTGCTGACGATCGCTGTCGTGCTCTTTGGCGCGATGCTACTGAT  
CACCACGCTGTTATCATCGTATCGCTATGTGCTAAAGCCTGTGTTGATTTTGCTATTAATCATGGGCGCGGTGACCAGTT  
ATTTTACTGACACTTATGGCACGGTCTATGATACGACCATGCTCCAAAATGCCCTACAGACCGACCAAGCCGAGACCAAG  
GATCTATTAAACGCAGCGTTTATCATGCGTATCATTGGTTTGGGTGTGCTACCAAGTTTGCTTGTGGCTTTTGTTAAGGT  
GGATTATCCGACTTGGGGCAAGGGTTTGATGCGCCGATTGGGCTTGATCGTGGCAAGTCTTGCGCTGATTTTACTGCCTG  
TGGTGGCGTTCAGCAGTCATTATGCCAGTTTCTTTCGCGTGCATAAGCCGCTGCGTAGCTATGTCAATCCGATCATGCCA  
ATCTACTCGGTGGGTAAGCTTGCCAGTATTGAGTATAAAAAAGCCAGTGCGCCAAAAGATACCATTTATCACGCCAAAGA  
CGCGGTACAAGCAACCAAGCCTGATATGCGTAAGCCACGCCTAGTGGTGTTTCGTTCGTTCGGTGAGACGGCACGCGCCGATC  
ATGTCAGCTTCAATGGCTATGAGCGCGATACTTTCCACAGCTTGCCAAGATCGATGGCGTGACCAATTTTAGCAATGTC  
ACATCGTGCGGCACATCGACGGCGTATTCTGTGCCGTGTATGTTTCAGCTATCTGGGCGCGGATGAGTATGATGTCGATAC  
CGCCAAATACCAAGAAAATGTGCTGGATACGCTGGATCGCTTGGGCGTAAGTATCTTGTGGCGTGATAATAATTCGGACT  
CAAAAGGCGTGATGGATAAGCTGCCAAAAGCGCAATTTGCCGATTATAAATCCGCGACCAACAACGCCATCTGCAACACC  
AATCCTTATAACGAATGCCGCGATGTCGGTATGCTCGTTGGCTTAGATGACTTTGTCGCTGCCAATAACGGCAAAGATAT  
GCTGATCATGCTGCACCAAATGGGCAATCACGGGCCTGCGTATTTTAAGCGATATGATGAAAAGTTTGCCAAATTCACGC  
CAGTGTGTGAAGGTAATGAGCTTGCCAAGTGCGAACATCAGTCCTTGATCAATGCTTATGACAATGCCTTGCTTGCCACC  
GATGATTTTCATCGCTCAAAGTATCCAGTGGCTGCAGACGCACAGCAATGCCTATGATGTCTCAATGCTGTATGTCAGCGA  
TCATGGCGAAAGTCTGGGTGAGAACGGTGTCTATCTACATGGTATGCCAAATGCCTTTGCACCAAAAGAACAGCGCAGTG  
TGCCTGCATTTTTCTGGACGGATAAGCAAACCTGGCATCACGCCAATGGCAACCGATACCGTCCTGACCCATGACGCGATC

ACGCCGACATTATTAAAGCTGTTGA

>Escherichia\_albertii\_mcr-1\_18

CGGTCAGTCCGTTTGTCTTGTGGCGAGTGTTGCCGTTTTCTTGACCGCGACCGCCAATCTTACCTTTTTTGATAAAATC  
AGCCAAACCTATCCCATCGCGGACAATCTCGGCTTTGTGCTGACGATCGCTGTCGTGCTCTTTGGCGCGATGCTACTGAT  
CACCACGCTGTTATCATCGTATCGCTATGTGCTAAAGCCTGTGTTGATTTTGCTATTAATCATGGGCGCGGTGACCAGTT  
ATTTTACTGACACTTATGGCACGGTCTATGATACGACCATGCTCCAAAATGCCCTACAGACCGACCAAGCCGAGACCAAG  
GATCTATTAAACGCAGCGTTTATCATGCGTATCATTGGTTTGGGTGTGCTACCAAGTTTGCTTGTGGCTTTTGTTAAGGT  
GGATTATCCGACTTGGGGCAAGGGTTTGATGCGCCGATTGGGCTTGATCGTGGCAAGTCTTGCGCTGATTTTACTGCCTG  
TGGTGGCGTTCAGCAGTCATTATGCCAGTTTCTTTCCGCTGCATAAGCCGCTGCGTAGCTATGTCAATCCGATCATGCCA  
ATCTACTCGGTGGGTAAGCTTGCCAGTATTGAGTATAAAAAAGCCAGTGCGCCAAAAGATACCATTTATCACGCCAAAGA  
CGCGGTACAAGCAACCAAGCCTGATATGCGTAAGCCACGCCTAGTGGTGTTTCGTTCGTTCGGTGAGACGGCACGCGCCGATC  
ATGTCAGCTTCAATGGCTATGAGCGCGATACTTTCCACAGCTTGCCAAGATCGATGGCGTGACCAATTTTAGCAATGTC  
ACATCGTGCGGCACATCGACGGCGTATTCTGTGCCGTGTATGTTTCAGCTATCTGGGCGCGGATGAGTATGATGTCGATAC  
CGCCAAATACCAAGAAAATGTGCTGGATACGCTGGATCGCTTGGGCGTAAGTATCTTGTGGCGTGATAATAATTCGGACT  
CAAAAGGCGTGATGGATAAGCTGCCAAAAGCGCAATTTGCCGATTATAAATCCGCGACCAACAACGCCATCTGCAACACC  
AATCCTTATAACGAATGCCGCGATGTTCGGTATGCTCGTTGGCTTAGATGACTTTGTCGCTGCCAATAACGGCAAAGATAT  
GCTGATCATGCTGCACCAAATGGGCAATCACGGGCCTGCGTATTTTAAGCGATATGATGAAAAGTTTGCCAAATTCACGC  
CAGTGTGTGAAGGTAATGAGCTTGCCAAGTGCGAACATCAGTCCTTGATCAATGCTTATGACAATGCCTTGCTTGCCACC  
GATGATTTTCATCGCTCAAAGTATCCAGTGGCTGCAGACGCACAGCAATGCCTATGATGTCTCAATGCTGTATGTCAGCGA

TCATGGCGAAAGTCTGGGTGAGAACGGTGTCTATCTACATGGTATGCCAAATGCCTTTGCACCAAAGAAGACAGCGCAGTG  
TGCCTGCATTTTTCTGGACGGATAAGCAAACCTGGCATCACGCCAATGGCAACCGATACCGTCCTGACCCATGACGCGATC  
ACGCCGACATTATTAAAGCTGT

>Moraxella\_sp.MCR-1.10\_19

ATGGTGCAGCATACTTCTGTGTGGTACCGATGCTCGGTGAGTCCGTTTGTTCTTGTGGCAAGTGTTCCGTTTTCTTGAC  
CGCGACCGCCAATCTTACCTTTTTTGATAAAATCAGCCAAACCTATCCCATCGCGGACAATCTCGGCTTTGTGCTGACGA  
TCGCTGTCGTGCTCTTTGGCGCGATGCTACTGATCACCACACTGTTATCATCGTATCGCTATGTGCTAAAGCCTGTGTTG  
ATTTTGCTATTAATCATGGGCGCGGTGACTAGTTATTTTACTGACACTTATGGCACGGTCTATGACACGACCATGCTCCA  
AAATGCCCTACAGACCGACCAAGCCGAGACCAAGGATCTATTAAACGCAGCGTTTATCATGCGTATCATTGGTTTGGGTG  
TACTACCAAGTTTGCTTGTGGCTTTTGTCAAGGTGGATTATCCGACTTGGGGCAAGGGTTTGGTGCGCCGATTGGGCTTG  
ATCGTGGCAAGTCTTGCGCTGATTTTACTGCCTGTGGTGGCGTTCAGCAGTCATTATGCCAGTTTTTTTCGCGTGCATAA  
GCCGCTGCGTTCGTATGTCAATCCGATCATGCCAATCTACTCGGTGGGTAAGCTTGCCAGTATTGAGTATAAAAAAGCCA  
GTGCGCCAAAAGATACCATTTATCACGCCAAAGACGCGGTACAAGCAACCAAGCCTGATACGCGTAAGCCACGCCTAGTG  
GTGTTGTCGTCGTCGGTGAGACGGCACGCGCCGATCATGTCAGCTTCAATGGCTATGAGCGCGATACTTTCCACAGCTTGC  
CAAGATCGATGGCGTGACCAATTTTAGCAATGTCACATCGTGCGGCACATCGACGGCGTATTCTGTGCCGTGTATGTTCA  
GCTATCTGGGCGCGGATGAGTATGATGTCGATACCGCCAAATACCAAGAAAATGTGCTTGATACGCTGGATCGTTTGGGC  
GTGAGCATCTTGTGGCGTGATAATAATTCGGACTCAAAGGCGTGATGGATAAGCTGCCAAAAGCGCAATTTGCCGATTA  
TAAATCCGCAACCAACAACACCATCTGCAACACCAATCCTTATAACGAATGCCGCGATGTCGGTATGCTCGTTGGCTTAG  
ATGACTTTGTGCTGCCAATAACGGCAAAGATATGCTGATCATGCTGCACCAAATGGGCAATCACGGGCCTGCGTATTTT



AAGCGATATGATGAAAAGTTTGCCAAATTCACGCCAGTGTGTGAAGGTAATGAGCTTGCCAAGTGCGAACATCAGTCTTT  
GATCAATGCTTATGACAATGCCTTGCTTGCCACCGATGATTTTCATCACTCAAAGTATCCAGTGGCTGCAGACGCACAGCA  
ATGCCTATGATGTCTCGATGCTGTATGTCAGCGATCATGGCGAGAGTCTAGGTGAGAATGGTGTCTATCTACATGGTATG  
CCTAATGCCTTTGCACCAAAAGAACAGCGCAGTGTGCCTGCATTTTTCTGGACAGATAAGCAAACCTGGCATCACGCCGAT  
GGCGACCGATACTGTCCTGACCCATGATGCGATCACACCAACATTATTAAGCTGTTTCGATGTTACCGCAGATAAAGTCA  
AAGACCGCACCGCATTTCATCCGCTGA

>Moraxella\_sp.mcr-1\_20

ATGGTGCAGCATACTTCTGTGTGGTACCGATGCTCGGTCAGTCCGTTTGTTCTTGTGGCAAGTGTTCGTTTTCTTGAC  
CGCGACCGCCAATCTTACCTTTTTTGATAAAATCAGCCAAACCTATCCCATCGCGGACAATCTCGGCTTTGTGCTGACGA  
TCGCTGTCGTGCTCTTTGGCGCGATGCTACTGATCACCACACTGTTATCATCGTATCGCTATGTGCTAAAGCCTGTGTTG  
ATTTTGCTATTAATCATGGGCGCGGTGACTAGTTATTTTACTGACACTTATGGCACGGTCTATGACACGACCATGCTCCA  
AAATGCCCTACAGACCGACCAAGCCGAGACCAAGGATCTATTAAACGCAGCGTTTATCATGCGTATCATTGGTTTGGGTG  
TACTACCAAGTTTGCTTGTGGCTTTTGTCAAGGTGGATTATCCGACTTGGGGCAAGGGTTTGGTGCGCCGATTGGGCTTG  
ATCGTGGCAAGTCTTGCGCTGATTTTACTGCCTGTGGTGGCGTTCAGCAGTCATTATGCCAGTTTTTTTCGCGTGCATAA  
GCCGCTGCGTTCGTATGTCAATCCGATCATGCCAATCTACTCGGTGGGTAAGCTTGCCAGTATTGAGTATAAAAAAGCCA  
GTGCGCCAAAAGATACCATTATCACGCCAAAGACGCGGTACAAGCAACCAAGCCTGATACGCGTAAGCCACGCCTAGTG  
GTGTTTCGTGTCGGTGAGACGGCACGCGCCGATCATGTCAGCTTCAATGGCTATGAGCGCGATACTTTCCACAGCTTGC  
CAAGATCGATGGCGTGACCAATTTTAGCAATGTCACATCGTGCGGCACATCGACGGCGTATTCTGTGCCGTGTATGTTCA

GCTATCTGGGCGCGGATGAGTATGATGTGCGATACCGCCAAATACCAAGAAAATGTGCTTGATACGCTGGATCGTTTGGGC  
GTGAGCATCTTGTGGCGTGATAATAATTCGGACTCAAAAGGCGTGATGGATAAGCTGCCAAAAGCGCAATTTGCCGATTA  
TAAATCCGCAACCAACAACACCATCTGCAACACCAATCCTTATAACGAATGCCGCGATGTCGGTATGCTCGTTGGCTTAG  
ATGACTTTGTCGCTGCCAATAACGGCAAAGATATGCTGATCATGCTGCACCAAATGGGCAATCACGGGCCTGCGTATTTT  
AAGCGATATGATGAAAAGTTTGCCAAATTCACGCCAGTGTGTGAAGGTAATGAGCTTGCCAAGTGCGAACATCAGTCCTT  
GATCAATGCTTATGACAATGCCTTGCTTGCCACCGATGATTTTCATCACTCAAAGTATCCAGTGGCTGCAGACGCACAGCA  
ATGCCTATGATGTCTCGATGCTGTATGTCAGCGATCATGGCGAGAGTCTAGGTGAGAATGGTGTCTATCTACATGGTATG  
CCTAATGCCTTTGCACCAAAAGAACAGCGCAGTGTGCCTGCATTTTTCTGGACAGATAAGCAAACCTGGCATCACGCCGAT  
GGCGACCGATACTGTCCTGACCCATGATGCGATCACACCAACATTATTAAGCTGTTTCGATGTTACCGCAGATAAAGTCA  
AAGACCGCACCGCATTTCATCCGCTGA

>Providencia\_alcalifaciens\_mcr-1\_20

CGCGACCGCCAATCTTACCTTTTTTGATAAAATCAGCCAAACCTATCCCATCGCGGACAATCTCGGCTTTGTGCTGACGA  
TCGCTGTCGTGCTCTTTGGCGCGATGCTACTGATCACCACGCTGTTATCATCGTATCGCTATGTGCTAAAGCCTGTGTTG  
ATTTTGCTATTAATCATGGGCGCGGTGACCAGTTATTTTACTGACACTTATGGCACGGTCTATGATACGACCATGCTCCA  
AAATGCCCTACAGACCGACCAAGCCGAGACCAAGGATCTATTAACGCAGCGTTTATCATGCGTATCATTGGTTTGGGTG  
TGCTACCAAGTTTGCTTGTGGCTTTTGTTAAGGTGGATTATCCGACTTGGGGCAAGGGTTTGATGCGCCGATTGGGCTTG  
ATCGTGGCAAGTCTTGCGCTGATTTTACTGCCTGTGGTGGCGTTCAGCAGTCATTATGCCAGTTTCTTTCGCGTGCATAA

GCCGCTGCGTAGCTATGTCAATCCGATCATGCCAATCTACTCGGTGGGTAAGCTTGCCAGTATTGAGTATAAAAAAGCCA  
GTGCGCCAAAAGATACCATTTATCACGCCAAAGACGCGGTACAAGCAACCAAGCCTGATATGCGTAAGCCACGCCTAGTG  
GTGTTTCGTCGTCGGTGAGACGGCACGCGCCGATCATGTCAGCTTCAATGGCTATGAGCGCGATACTTTCCACAGCTTGC  
CAAGATCGATGGCGTGACCAATTTTAGCAATGTCACATCGTGCGGCACATCGACGGCGTATTCTGTGCCGTGTATGTTCA  
GCTATCTGGGCGCGGATGAGTATGATGTGCGATACCGCCAAATACCAAGAAAATGTGCTGGATACGCTGGATCGCTTGGGC  
GTAAGTATCTTGTGGCGTGATAATAATTCGGACTCAAAAGGCGTGATGGATAAGCTGCCAAAAGCGCAATTTGCCGATTA  
TAAATCCGCGACCAACAACGCCATCTGCAACACCAATCCTTATAACGAATGCCGCGATGTCGGTATGCTCGTTGGCTTAG  
ATGACTTTGTGCGCTGCCAATAACGGCAAAGATATGCTGATCATGCTGCACCAAATGGGCAATCACGGGCCTGCGTATTTT  
AAGCGATATGATGAAAAGTTTGCCAAATTCACGCCAGTGTGTGAAGGTAATGAGCTTGCCAAGTGCGAACATCAGTCCTT  
GATCAATGCTTATGACAATGCCTTGCTTGCCACCGATGATTTTCATCGCTCAAAGTATCCAGTGGCTGCAGACGCACAGCA  
ATGCCTATGATGTCTCAATGCTGTATGTCAGCGATCATGGCGAAAGTCTGGGTGAGAACGGTGTCTATCTACATGGTATG  
CCAAATGCCTTTGCACCAAAAGAACAGCGCAGTGTGCCTGCATTTTTCTGGACGGATAAGCAAACCTGGCATCACGCCAAT  
GGCAACCGATACCGTCCTGACCCATGACGCGATCACGCCGACATTATTAAAGCTGTT

>Enterobacter\_cloacae\_mcr-1\_21

CGCGACCGCCAATCTTACCTTTTTTGATAAAATCAGCCAAACCTATCCCATCGCGGACAATCTCGGCTTTGTGCTGACGA  
TCGCTGTCGTGCTCTTTGGCGCGATGCTACTGATCACCACGCTGTTATCATCGTATCGCTATGTGCTAAAGCCTGTGTTG  
ATTTTGCTATTAATCATGGGCGCGGTGACCAGTTATTTTACTGACACTTATGGCACGGTCTATGATACGACCATGCTCCA  
AAATGCCCTACAGACCGACCAAGCCGAGACCAAGGATCTATTAAACGCAGCGTTTATCATGCGTATCATTGGTTTGGGTG

TGCTACCAAGTTTGCTTGTGGCTTTTGTTAAGGTGGATTATCCGACTTGGGGCAAGGGTTTGATGCGCCGATTGGGCTTG  
ATCGTGGCAAGTCTTGCGCTGATTTTACTGCCTGTGGTGGCGTTCAGCAGTCATTATGCCAGTTTCTTTCGCGTGCATAA  
GCCGCTGCGTAGCTATGTCAATCCGATCATGCCAATCTACTCGGTGGGTAAAGCTTGCCAGTATTGAGTATAAAAAAGCCA  
GTGCGCCAAAAGATAACCATTTATCACGCCAAAGACGCGGTACAAGCAACCAAGCCTGATATGCGTAAGCCACGCCTAGTG  
GTGTTTCGTCGTCGGTGAGACGGCACGCGCCGATCATGTCAGCTTCAATGGCTATGAGCGCGATACTTTCCACAGCTTGC  
CAAGATCGATGGCGTGACCAATTTTAGCAATGTCACATCGTGCGGCACATCGACGGCGTATTCTGTGCCGTGTATGTTCA  
GCTATCTGGGCGCGGATGAGTATGATGTCGATACCGCCAAATACCAAGAAAATGTGCTGGATACGCTGGATCGCTTGGGC  
GTAAGTATCTTGTGGCGTGATAATAATTCGGACTCAAAAGGCGTGATGGATAAGCTGCCAAAAGCGCAATTTGCCGATTA  
TAAATCCGCGACCAACAACGCCATCTGCAACACCAATCCTTATAACGAATGCCGCGATGTCGGTATGCTCGTTGGCTTAG  
ATGACTTTGTGCTGCCAATAACGGCAAAGATATGCTGATCATGCTGCACCAAATGGGCAATCACGGGCCTGCGTATTTT  
AAGCGATATGATGAAAAGTTTGCCAAATTCACGCCAGTGTGTGAAGGTAATGAGCTTGCCAAGTGCGAACATCAGTCCTT  
GATCAATGCTTATGACAATGCCTTGCTTGCCACCGATGATTTTCATCGCTCAAAGTATCCAGTGGCTGCAGACGCACAGCA  
ATGCCTATGATGTCTCAATGCTGTATGTCAGCGATCATGGCGAAAGTCTGGGTGAGAACGGTGTCTATCTACATGGTATG  
CCAAATGCCTTTGCACCAAAAAGAACAGCGCAGTGTGCCTGCATTTTTCTGGACGGATAAGCAAACCTGGCATCACGCCAAT  
GGCAACCGATACCGTCCTGACCCATGACGCGATCACGCCGACATTATTAAAGCTGTT

>Providencia\_stuartii\_mcr-1\_22

CGCGACCGCCAATCTTACCTTTTTTGATAAAATCAGCCAAACCTATCCCATCGCGGACAATCTCGGCTTTGTGCTGACGA  
TCGCTGTCGTGCTCTTTGGCGCGATGCTACTGATCACCACGCTGTTATCATCGTATCGCTATGTGCTAAAGCCTGTGTTG

ATTTTGCTATTAATCATGGGCGCGGTGACCAGTTATTTTACTGACACTTATGGCACGGTCTATGATACGACCATGCTCCA  
AAATGCCCTACAGACCGACCAAGCCGAGACCAAGGATCTATTAAACGCAGCGTTTATCATGCGTATCATTGGTTTGGGTG  
TGCTACCAAGTTTGCTTGTGGCTTTTGTTAAGGTGGATTATCCGACTTGGGGCAAGGGTTTGATGCGCCGATTGGGCTTG  
ATCGTGGCAAGTCTTGCGCTGATTTTACTGCCTGTGGTGGCGTTCAGCAGTCATTATGCCAGTTTCTTTCGCGTGCATAA  
GCCGCTGCGTAGCTATGTCAATCCGATCATGCCAATCTACTCGGTGGGTAAAGCTTGCCAGTATTGAGTATAAAAAAGCCA  
GTGCGCCAAAAGATACCATTTATCACGCCAAAGACGCGGTACAAGCAACCAAGCCTGATATGCGTAAGCCACGCCTAGTG  
GTGTTTCGTCGTCGGTGAGACGGCACGCGCCGATCATGTCAGCTTCAATGGCTATGAGCGCGATACTTTCCACAGCTTGC  
CAAGATCGATGGCGTGACCAATTTTAGCAATGTCACATCGTGCGGCACATCGACGGCGTATTCTGTGCCGTGTATGTTCA  
GCTATCTGGGCGCGGATGAGTATGATGTCGATACCGCCAAATACCAAGAAAATGTGCTGGATACGCTGGATCGCTTGGGC  
GTAAGTATCTTGTGGCGTGATAATAATTCGGACTCAAAAGGCGTGATGGATAAGCTGCCAAAAGCGCAATTTGCCGATTA  
TAAATCCGCGACCAACAACGCCATCTGCAACACCAATCCTTATAACGAATGCCGCGATGTCGGTATGCTCGTTGGCTTAG  
ATGACTTTGTCGCTGCCAATAACGGCAAAGATATGCTGATCATGCTGCACCAAATGGGCAATCACGGGCCTGCGTATTTT  
AAGCGATATGATGAAAAGTTTGCCAAATTCACGCCAGTGTGTGAAGGTAATGAGCTTGCCAAGTGCGAACATCAGTCCTT  
GATCAATGCTTATGACAATGCCTTGCTTGCCACCGATGATTTTCATCGCTCAAAGTATCCAGTGGCTGCAGACGCACAGCA  
ATGCCTATGATGTCTCAATGCTGTATGTCAGCGATCATGGCGAAAGTCTGGGTGAGAACGGTGTCTATCTACATGGTATG  
CCAAATGCCTTTGCACCAAAAAGAACAGCGCAGTGTGCCTGCATTTTTCTGGACGGATAAGCAAACCTGGCATCACGCCAAT  
GGCAACCGATACCGTCCTGACCCATGACGCGATCACGCCGACATTATTAAAGCTGTT

>Salmonella\_enterica\_MCR-1\_23

TAATACCCACCGTTTATTTTTGAGTAGTTTCTCATGATGCAGCATACTTCTGTGTGGTACCGACGCTCGGTCAGTCCG  
TTTGTCTTGTGGCGAGTGTTGCCGTTTTCTTGACCGCGACCGCCAATCTTACCTTTTTTGATAAAATCAGCCAAACCTA  
TCCCATCGCGGACAATCTCGGCTTTGTGCTGACGATCGCTGTCGTGCTCTTTGGCGCGATGCTACTGATCACCACGCTGT  
TATCATCGTATCGCTATGTGCTAAAGCCTGTGTTGATTTTGCTATTAATCATGGGCGCGGTGACCAGTTATTTTACTGAC  
ACTTATGGCACGGTCTATGATACGACCATGCTCCAAAATGCCCTACAGACCGACCAAGCCGAGACCAAGGATCTATTA  
CGCAGCGTTTATCATGCGTATCATTGGTTTGGGTGTGCTACCAAGTTTGCTTGTGGCTTTTGTTAAGGTGGATTATCCGA  
CTTGGGGCAAGGGTTTGATGCGCCGATTGGGCTTGATCGTGGCAAGTCTTGCGCTGATTTTACTGCCTGTGGTGGCGTTC  
AGCAGTCATTATGCCAGTTTCTTTCGCGTGCATAAGCCGCTGCGTAGCTATGTCAATCCGATCATGCCAATCTACTCGGT  
GGGTAAGCTTGCCAGTATTGAGTATAAAAAAGCCAGTGCGCCAAAAGATACCA

>Uncultured\_bacterium\_MCR-2.4\_24

ATGACATCACATCACTCTTGGTATCGCTACTCCATCAATCCTTTTGTACTGATGGGTTTGGTGGCGTTATTTTTGGCGGC  
AACAGCGAACCTGACATTTTTTGAAAAAGCGATGGCGGTCTATCCTGTATCGGATAACTTAGGCTTTATCATCTCAATGG  
CGGTTGCACTGATGGGTGCTATGCTATTGATTGTCGTTCTGTTTTCTATCGTTATGTGCTCAAGCCTGTGCTGATTTTG  
CTTTTGATGATGGGTGCGGTAACCAGTTATTTTACCGATACTTATGGCACAGTCTATGATACGACCATGCTACAAAATGC  
CCTGCAAACCGACCAAGCTGAGTCCAAGGACTTGATGAATTTGGCGTTTTTTGTGCGGATTATTGGGCTTGGTGTTTTGC  
CGAGCATAGTGGTGGCGTGGGTCAAGGTGGATTATCCAACATGGGGCAAAGGCCTGATTCAGCGTGCGATGACGTGGGGT  
GTCAGCCTTGTGCTGTTGCTTGTGCCGATTGGGTATTTAGCAGTCAGTATGCGAGTTTCTTTCGGGTGCATAAGCCAGT  
GCGTTTTTATATCAACCCGATTACGCCGATTTATTCGGTGGGTAAGCTTGCCAGTATCGAGTACAAAAAAGCCACTGCGC

CAAAAGACACCATCTATCATGCCAAAGATGCCGTGCAGACCACCAAGCCGAGCGAGCGTAAGCCACGCCTAGTGGTGTT  
GTCGTCGGTGAGACGGTGCGCGCTGACCATGTGCAGTTCAATGGCTATAGCCGTGAGACTTTCCCGCAGCTTGCCAAAGT  
TGATGGCTTGGCGAACTTTAGCCAAGTGACATCGTGTGGCACATCGACGGCGTATTCTGTGCCGTGTATGTTTCAGCTATC  
TGGGTCAAGATGACTATGATGTCGATACCGCCAAATACCAAGAAAATGTCCTAGATACGCTTGACCGCTTGGGCGTGGAT  
ATCTTGTGGCGTGATAATAATTCAGACTCAAAAGGCGTGATGGATAAGCTGCCTGCCACGCAGTATTTTGATTATAAATC  
AGCGACCAACAACACCATCTGCAACACCAATCCCTATAACGAATGTCGTGATGTCGGTATGCTTGTTGGGCTAGACGACT  
ATGTCAGCGCCAATAATGGCAAAGATATGCTTATCATGCTACACCAAATGGGCAATCATGGGCCGGCGTACTTTAAGCGT  
TATGATGAGCAATTTGCCAAATTCACCCCTGTGTGCGAAGGCAATGAGCTTGCCAAATGCGAACATCAATCGCTCATCAA  
TGCCTATGATAATGCACTACTTGCCACCGATGATTTTATCGCCAAAAGTATCGATTGGCTAAAAACACATGAAGCAAAC  
ACGATGTCGCCATGCTCTATGTCAGCGACCACGGCGAGAGCTTGGGCGAAAATGGTGTCTATTTGCATGGTATGCCAAAT  
GCCTTTGCACCAAAAAGAACAGCGTGCCGTACCTGCGTTTTTTTTGGTCAAATAATACATCGTTCAAGCCAACTGCCAGCGA  
TACTGCATTGACCCATGATGCAATTACGCCGACACTGCTTAAGCTGTTTGATGTCACAGCGGGCAAGGTCAAAGACCGCA  
CGGCATTTATCCAGTAA

>Moraxella\_pluranimalium\_mcr-2.2\_25

ATGACATCACAGCACTCTTGGTATCGCTACTCCATCAATCCTTTTGTACTGATGGGTTTGGTGGCGTTATTTTTGGCGGC  
AACAGCGAACCTGACATTTTTTTGAAAAAGCGATGGCGGTCTATCCTGTATCGGATAACTTAGGCTTTATCATCTCAATGG  
CGGTTGCACTGATGGGTGCTATGCTATTGATTGTCGTGCTATTATCCTATCGCTATGTGCTAAAGCCTGTGCTGATTTTA

TTACTTATCATGGGTGCGGTGACGAGCTATTTTACCGATACTTATGGCACGGTCTATGATACCACCATGCTCCAAAATGC  
CATGCAAACCGACCAAGCTGAATCTAAAGACTTGATGAATTTGGCGTTTTTTGTGCGGATTATCGGGCTTGGCGTGTTGC  
CAAGTGTGTTGGTCGCATTTGCCAAAGTCAATTATCCAACATGGGGCAAAGGCCTGATTCAGCGTGCGATGACGTGGGGT  
GTCAGCCTTGTGCTGTTGCTTGTGCCGATTGGGCTATTTAGCAGTCAGTATGCGAGTTTCTTTCGGGTGCATAAGCCAGT  
GCGTTTTTATATCAATCCGATTACGCCGATTTATTCGGTGGGCAAGCTTGCCAGTATCGAGTACAAAAAAGCCACTGCAC  
CAACAGACACCATCTATCATGCCAAAGATGCCGTGCAGACCACCAAGCCTAGCGAGCGTAAGCCACGCCTAGTAGTGTTT  
GTCGTCCGTGAGACGGCGCGTGCTGACCATGTGCAGTTCAATGGCTATGGCCGTGAGACTTTCCACAGCTTGCCAAAGT  
TGATGGCTTGGCGAATTTTAGCCAAGTGACATCGTGTGGCACATCGACAGCGTATTCTGTGCCGTGTATGTTTAGCTATT  
TGGGTCAAGATGACTATGATGTCGATACCGCCAAATACCAAGAAAATGTGCTAGATACGCTTGACCGCTTGGGCGTGGAT  
ATCTTGTGGCGTGATAATAATTCAGACTCAAAAGGCGTGATGGATAAGCTACCTACCACGCAGTATTTTGATTATAAATC  
AGCGACCAACAACACCATCTGTAACACCAATCCCTTTAATGAATGCCGTGATGTCGGTATGCTTGTGGGCTAGATGACT  
ATGTCAGTGCCAATAATGGCAAAGATATGCTCATCATGCTACACCAAATGGGCAATCATGGGCCGGCGTACTTTAAGCGT  
TATGATGAGCAATTTGCCAAATTCACCCCTGTGTGCGAAGGCAATGAGCTTGCCAAATGCGAACACCAATCACTCATCAA  
TGCCTATGATAATGCACTACTTGCCACCGATGATTTTATCGCCAAAAGTATCGATTGGCTAAAAACACATGAAGCAAAT  
ACGATGTCGCTATGCTCTATGTCAGCGACCACGGCGAGAGCTTGGGCGAGAATGGTGTCTATCTGCATGGTATGCCAAAT  
GCCTTTGCACCAAAAGAACAGCGAGCCGTGCCTGCGTTTTTTTGGTCAAATAATACGACATTCAAGCCAACTGCCAGCGA  
CACTGTGCTGACGCATGATGCGATTACCCCGACATTGCTTAAGCTGTTTGATGTCACAGCCGACAAGGTCAAAGACCGCA  
CGGCATTTATCCAGTAA



>Moraxella\_pluranimalium\_MCR-2.2\_26

TGCACTATTTTATTTATCTGCACAATATATCTAGATTCTCCAACGACATTGAAGTATAATCGCCAACTTGTATTGTATAT  
GGCATTGTGGGTAATCTTTATGACATCACAGCACTCTTGGTATCGCTACTCCATCAATCCTTTTGTACTGATGGGTTTG  
GTGGCGTTATTTTTGGCGGCAACAGCGAACCTGACATTTTTTGAAAAAGCGATGGCGGTCTATCCTGTATCGGATAACTT  
AGGCTTTATCATCTCAATGGCGGTTGCACTGATGGGTGCTATGCTATTGATTGTCGTGCTATTATCCTATCGCTATGTGC  
TAAAGCCTGTGCTGATTTTATTACTTATCATGGGTGCGGTGACGAGCTATTTTACCGATACTTATGGCACGGTCTATGAT  
ACCACCATGCTCCAAAATGCCATGCAAACCGACCAAGCTGAATCTAAAGACTTGATGAATTTGGCGTTTTTTGTGCGGAT  
TATCGGGCTTGGCGTGTTGCCAAGTGTGTTGGTTCGATTTGCCAAAGTCAATTATCCAACATGGGGCAAAGGCCTGATTC  
AGCGTGCGATGACGTGGGGTGTCAGCCTTGTGCTGTTGCTTGTGCCGATTGGGCTATTTAGCAGTCAGTATGCGAGTTTC  
TTTCGGGTGCATAAGCCAGTGCGTTTTTATATCAATCCGATTACGCCGATTTATTCGGTGGGCAAAGCTTGCCAGTATCGA  
GTACAAAAAAGCCACTGCACCAACAGACACCATCTATCATGCCAAAGATGCCGTGCAGACCACCAAGCCTAGCGAGCGTA  
AGCCACGCCTAGTAGTGTTTCGTCGTCGGTGAGACGGCGCGTGCTGACCATGTGCAGTTCAATGGCTATGGCCGTGAGACT  
TTCCACAGCTTGCCAAAGTTGATGGCTTGGCGAATTTTAGCCAAGTGACATCGTGTGGCACATCGACAGCGTATTCTGT  
GCCGTGTATGTTTAGCTATTTGGGTCAAGATGACTATGATGTCGATACCGCCAAATACCAAGAAAATGTGCTAGATACGC  
TTGACCGCTTGGGCGTGGATATCTTGTGGCGTGATAATAATTCAGACTCAAAGGCGTGATGGATAAGCTACCTACCACG  
CAGTATTTTGATTATAAATCAGCGACCAACAACACCATCTGTAACACCAATCCCTTTAATGAATGCCGTGATGTCGGTAT  
GCTTGTGGGCTAGATGACTATGTCAGTGCCAATAATGGCAAAGATATGCTCATCATGCTACACCAAATGGGCAATCATG  
GGCCGGCGTACTTTAAGCGTTATGATGAGCAATTTGCCAAATTCACCCCTGTGTGCGAAGGCAATGAGCTTGCCAAATGC  
GAACACCAATCACTCATCAATGCCTATGATAATGCACTACTTGCCACCGATGATTTTATCGCCAAAAGTATCGATTGGCT

AAAAACACATGAAGCAAACACTACGATGTCGCTATGCTCTATGTCAGCGACCACGGCGAGAGCTTGGGCGAGAATGGTGTCT  
ATCTGCATGGTATGCCAAATGCCTTTGCACCAAAAGAACAGCGAGCCGTGCCTGCGTTTTTTTTGGTCAAATAATACGACA  
TTCAAGCCAACTGCCAGCGACACTGTGCTGACGCATGATGCGATTACCCCGACATTGCTTAAGCTGTTTGATGTCACAGC  
CGACAAGGTCAAAGACCGCACGGCATTATCCAGTAAGTTATCAGCATCACCCAATCCCAAGCCATCATACTACATCATC  
GTGTGATGGCAAAGGGCGGTTTTGCAATGTGTTTTGCAATGTTTTTTTAGGAATGTA

>Moraxella\_pluranimalium\_mcr-2\_27

ATGACATCACAGCACTCTTGGTATCGCTACTCCATCAATCCTTTTGTACTGATGGGTTTGGTGGCGTTATTTTTGGCGGC  
AACAGCGAACCTGACATTTTTTGA AAAAAGCGATGGCGGTCTATCCTGTATCGGATAACTTAGGCTTTATCATCTCAATGG  
CGGTTGCACTGATGGGTGCTATGCTATTGATTGTCGTGCTATTATCCTATCGCTATGTGCTAAAGCCTGTGCTGATTTTA  
TTACTTATCATGGGTGCGGTGACGAGCTATTTTACCGATACTTATGGCACGGTCTATGATACCACCATGCTCCAAAATGC  
CATGCAAACCGACCAAGCTGAATCTAAAGACTTGATGAATTTGGCGTTTTTTGTGCGGATTATCGGGCTTGGCGTGTTGC  
CAAGTGTGTTGGTCGCATTTGCCAAAGTCAATTATCCAACATGGGGCAAAGGCCTGATTCAGCGTGCGATGACGTGGGGT  
GTCAGCCTTGTGCTGTTGCTTGTGCCGATTGGGCTATTTAGCAGTCAGTATGCGAGTTTCTTTCGGGTGCATAAGCCAGT  
GCGTTTTTATATCAATCCGATTACGCCGATTTATTCGGTGGGCAAGCTTGCCAGTATCGAGTACAAAAAAGCCACTGCAC  
CAACAGACACCATCTATCATGCCAAAGATGCCGTGCAGACCACCAAGCCTAGCGAGCGTAAGCCACGCCTAGTAGTGTTT  
GTCGTCGGTGAGACGGCGCGTGCTGACCATGTGCAGTTCAATGGCTATGGCCGTGAGACTTTCCACAGCTTGCCAAAGT  
TGATGGCTTGGCGAATTTTAGCCAAGTGACATCGTGTGGCACATCGACAGCGTATTCTGTGCCGTGTATGTTTAGCTATT  
TGGGTCAAGATGACTATGATGTCGATACCGCCAAATACCAAGAAAATGTGCTAGATACGCTTGACCGCTTGGGCGTGAT

ATCTTGTGGCGTGATAATAATTCAGACTCAAAAGGCGTGATGGATAAGCTACCTACCACGCAGTATTTTGATTATAAATC  
AGCGACCAACAACACCATCTGTAACACCAATCCCTTTAATGAATGCCGTGATGTCGGTATGCTTGTTGGGCTAGATGACT  
ATGTCAGTGCCAATAATGGCAAAGATATGCTCATCATGCTACACCAAATGGGCAATCATGGGCCGGCGTACTTTAAGCGT  
TATGATGAGCAATTTGCCAAATTCACCCCTGTGTGCGAAGGCAATGAGCTTGCCAAATGCGAACACCAATCACTCATCAA  
TGCCTATGATAATGCACTACTTGCCACCGATGATTTTATCGCCAAAAGTATCGATTGGCTAAAAACACATGAAGCAAAC  
ACGATGTCGCTATGCTCTATGTCAGCGACCACGGCGAGAGCTTGGGCGAGAATGGTGTCTATCTGCATGGTATGCCAAAT  
GCCTTTGCACCAAAAGAACAGCGAGCCGTGCCTGCGTTTTTTTTGGTCAAATAATACGACATTCAAGCCAACTGCCAGCGA  
CACTGTGCTGACGCATGATGCGATTACCCCGACATTGCTTAAGCTGTTTGATGTCACAGCCGACAAGGTCAAAGACCGCA  
CGGCATTTATCCAGTAA

>Uncultured\_bacterium\_MCR-2.5\_28

ATGACATCACAGCACTCTTGGTATCGCTACTCCATCAATCCTTTTGTACTGATGGGTTTGGTGGCGTTTTTTTTGGCAGC  
GACAGCGAACCTGACATTTTTTGAAAAAGCGATGGCGGTCTATCCTGTATCGGATAACTTAGGCTTTATCGTCTCAATGG  
CGGTTGCGCTGATGGGTGCTATGCTATTGATTGTCGTGCTATTATCCTATCGCTATGTGCTAAAGCCTGTCCTGATTTTG  
CTACTGATTATGGGTGCGGTGACGAGCTATTTTACCGATACTTATGGCACGGTCTATGATACCACCATGCTCCAAAATGC  
CATGCAAACCGACCAAGCCGAGTCTAAAGACTTGATGAATTTGGCGTTTTTTGTGCGGATTATCGGGCTTGGTGTGTTGC  
CAAGTCTATTGGTCGCAGTTGCCAAAGTTAATTATCCAACATGGGGCAAAAGCCTGATTCAGCGTGCGATGACGTGGGGT  
GTCAGCCTTGTGCTGTTGCTTGTGCCGATTGGACTATTTAGCAGTCAGTATGCGAGTTTCTTTCGGGTGCATAAGCCAGT  
GCGTTTTTATATCAATCCGATTACGCCGATTTATTCGGTGGGTAAGCTTGCCAGTATCGAGTACAAAAAAGCCACTGCGC

CGACAGACACCATCTATCATGCCAAAGATGCCGTGCAGACCACCAAGCCTAGCGAGCGTAAGCCACGCCTAGTGGTGTTTC  
GTCGTGCGGTGAGACGGCTCGTGCTGACCATGTGCAGTTCAATGGCTATGGCCGTGAGACTTTCCACAGCTTGCTAAGGT  
CGATGGCTTGGCGAATTTTAGCCAAGTGACATCGTGTGGCACATCGACGGCGTATTCTGTGCCGTGTATGTTTCAGCTATC  
TGGGTCAAGATGACTATGATGTCGATACCGCCAAATACCAAGAAAATGTGCTAGATACGCTTGACCGCTTGGGCGTGGGT  
ATCTTGTGGCGTGATAATAATTCAGACTCAAAAGGCGTGATGGATAAGCTACCTGCCACGCAGTATTTTGATTATAAATC  
AGCAACCAACAACACCATCTGTAACACCAACCCTTATAATGAATGTCGTGATGTCGGTATGCTTGTTGGGCTAGATGACT  
ATGTCAGCACCAATAATGGTAAAGATATGCTCATCATGCTACACCAAATGGGCAATCATGGGCCGGCGTACTTTAAGCGT  
TATGATGAGCAATTTGCCAAATTCACCCCCGTGTGCGAAGGCAACGAGCTTGCCAAATGCGAACATCAATCGCTCATCAA  
TGCCTATGATAATGCGCTACTTGCCACCGATGATTTTATCGCCAAAAGTATCGATTGGCTAAAAACACATGAAGCAAAC  
ACGATGTCGCCATGCTCTATGTCAGCGACCACGGCGAGAGTTTGGGCGAGAATGGCGTCTATTTGCATGGTATGCCAAAT  
GCCTTTGCACCAAAAGAACAGCGAGCCGTGCCTGCGTTTTTTTTGGTCAAATAATACGACATTCAAGCCAACTGCCAGCGA  
CACTGTGCTGACGCATGATGCGATTACGCCAACACTGCTTAAGCTGTTTGATGTCACAGCGGGCAAGGTCAAAGACCGCA  
CGGCATTTATCCAGTAA

>Uncultured\_bacterium\_MCR-2.7\_29

ATGACATCACAGCACTCTTGGTATCGCTACTCCATCAATCCTTTTGTACTGATGGGTTTGGTGGCGTTTTTTTTGGCAGC  
GACAGCGAACCTGACATTTTTTTGAAAAAGCGATGGCGGTCTATCCTGTATCGGATAACTTAGGCTTTATCGTCTCAATGG  
CGGTTGCGCTGATGGGTGCTATGCTATTGATTGTCGTGCTATTATCCTATCGCTATGTGCTAAAGCCTGTCCTGATTTTG  
CTACTGATTATGGGTGCGGTGACGAGCTATTTTACCGATACTTATGGCACGGTCTATGATACCACCATGCTCCAAAATGC

CATGCAAACCGACCAAGCCGAGTCTAAAGACTTGATGAATTTGGCGTTTTTTGTGCGGATTATCGGGCTTGGTGTGTTGC  
CAAGTGTGTTGGTCGCAGTTGCCAAAGTCAATTATCCAACATGGGGCAAAGGCCTGATTACAGCGTGCGATGACGTGGGGT  
GTCAGCCTTGTGCTGTTGCTTGTGCCGATTGGACTATTTAGCAGTCAGTATGCGAGTTTCTTTCGGGTGCATAAGCCAGT  
GCGTTTTTATATTAACCCGATTACGCCGATTTATTCGGTGGGTAAAGCTTGCCAGTATCGAGTACAAAAAAGCCACTGCGC  
CAACAGACACTATCTATCATGCCAAAGATGCCGTGCAGACCACCAAGCCGAGCGAGCGTAAGCCACGCCTAGTGGTGTTC  
GTCGTCCGTGAGACGGCTCGTGCTGACCATGTGCAGTTCAATGGCTATGGCCGCGAGACTTTCCACAGCTTGCCAAAGT  
TGACGGCTTGGCGAACTTTAGCCAAGTGACATCGTGTGGCACATCGACGGCGTATTCTGTGCCGTGTATGTTTAGCTATC  
TGGGTCAAGATGACTATGATGTCGATACCGCCAAATACCAAGAAAATGTGCTGGATACGCTTGACCGCTTGGGCGTGGGC  
ATCTTGTGGCGTGATAATAATTCAGACTCAAAAGGTGTGATGGATAAGCTACCTGCCACGCAGTATTTTGATTATAAATC  
AGCGACCAACAACACCATCTGTAGCACCAACCCCTATAATGAATGTCGTGATGTCGGTATGCTTGTCGGGCTAGATGACT  
ATGTCAGCGCCAATAATGGCAAAGATATGCTCATCATGCTACACCAAATGGGCAATCATGGGCCGGCGTACTTTAAGCGT  
TATGATGAGCAATTTGCCAAATTCACCCCTGTGTGCGAAGGCAACGAGCTTGCCAAATGCGAACATCAATCGCTCATCAA  
TGCCTATGATAATGCGCTACTTGCCACCGATGATTTTATCGCCAAAAGTATCGATTGGCTAAAAACACATGAAGCGAACT  
ACGATGTCGCCATGCTGTATGTCAGCGACCACGGCGAGAGCTTGGGTGAGAATGGCGTCTATCTGCATGGTATGCCAAAT  
GCCTTTGCACCAAAAGAACAGCGAGCCGTGCCTGCGTTTTTTTGGTCAAATAATACATCGTTCAAGCCAACTGCCAGCGA  
TACTGTGCTGACTCATGATGCGATTACGCCGACACTGCTTAAGCTGTTTGATGTCACAGCCGACAAGGTCAAAGACCGCA  
CGGCATTTATCCAGTAA

ATGACACAGCATAGTCCTTGGTACCGCCGTCCGGTCAATCCCTATCTGTTGATGAGCGTGGTTCGCTTTATTTTTGTTCAGC  
GACAGCAAACCTAACTTTCTTTGATAAAATCACCAATACTTATCCGATGGCACAAAACGCAGGCTTTGTGATCTCAACGG  
CGCTTGTGCTATTTGGGGCGATGCTATTGATTACTGTGCTGTTATCGTATCGCTATGTGCTTAAGCCTGTGTTGATTTTG  
CTGCTTATCATGGGTGCGGTGACGAGCTATTTTACCGATACTTATGGCACCGTTTATGACACCACCATGCTCCAAAATGC  
CTTGCAAACCTGACCAAGCCGAGTCTAAGGACTTGATGAATATGGCGTTTTTTGTGCGGATTATCGGGCTTGGCGTGTTGC  
CAAGTATCTTGGTGGCGTGGGTCAAGGTGGATTATCCGACATTGGGTAAAGAGTCTGATTCAGCGTGCGATGACTTGGGGT  
GTGGCAGTGGTGATGGCACTTGTGCCGATTTTGGCATTTAGTAGTCACTACGCCAGTTTCTTTCGTGAACATAAGCCACT  
GCGTAGCTATGTCAATCCCGTGATGCCGATTTATTCAGTAGGTAAGCTTGCCAGTATTGAGTACAAAAAAGCCACCGCGC  
CAAAAGACACCATCTATCATGCCAAAGATGCTGTACAGACGACGACGCCTGCCGAGCGTAAGCCACGACTCGTGGTGTTTC  
GTCGTCCGTGAGACGGCTCGAGCTGACCATGTGCAGTTTAATGGCTATAGTCGTGAGACTTTTCCGCAGCTTGCCAAGAT  
TGACAACCTAGCCAATTTTAGCCAAGTGACATCGTGTGGCACATCGACGGCGTACTCTGTGCCGTGTATGTTCAGTTATC  
TGGGTCAAGATGACTATGATGTGATACCGCCAAATACCAAGAAAACGTGCTGGATACGCTTGACCGACTGGGTGTGGGT  
ATCCTGTGGCGGGATAATAATTCAGACTCAAAGGCGTGATGGATAAACTGCCTGCTTCGCAGTATTTTGATTATAAATC  
AGCGACCAACAACACCATCTGTAACACCAATCCTTACAACGAATGTCGTGATGTCGGTATGTTGGTGGGGCTAGATGATT  
ATGTGAGTACCAATCAAGGCAAAGATATGCTCATCATGCTACACCAAATGGGTAATCATGGGCCGGCGTACTTCAAGCGT  
TATGACGAGCAATTTGCCAAATACACCCCTGTGTGCGAAGGTAATGAACTTGCCAAGTGTGAACACCAATCGCTCATCAA  
CGCCTATGATAATGCACTGCTTGCGACCGATGATTTTATCGCCAAAAGTATCGATTGGCTAAAAACGCATCAGGCCAACT  
ATGATGTTGCCATGCTCTATGTCAGCGACCACGGCGAGAGTCTGGGTGAAAATGGCGTCTATCTGCATGGTATGCCAAAT

GCCTTTGCACCAAAAGAACAGCGAGCGGTACCGGCATTCTTTTGGTCAAATAATCCATCGTTCACGCCAACTGCCAGCGA  
CACTGTGCTGACACATGATGCGATTACGCCGACTCTACTGAAGCTGTTTGATGTCACAGCGGATAAGGTCAAAGACCGCA  
CCGCATTCATCCGCTGA

>Moraxella\_sp.\_mcr-6\_31

ATGACACAGCATAGTCCTTGGTACCGCCGTCCGGTCAATCCCTATCTGTTGATGAGCGTGGTCGCTTTATTTTTGTCAGC  
GACAGCAAACCTAACTTTCTTTGATAAAATCACCAATACTTATCCGATGGCACAAAACGCAGGCTTTGTGATCTCAACGG  
CGCTTGTGCTATTTGGGGCGATGCTATTGATTACTGTGCTGTTATCGTATCGCTATGTGCTTAAGCCTGTGTTGATTTTG  
CTGCTTATCATGGGTGCGGTGACGAGCTATTTTACCGATACTTATGGCACCGTTTATGACACCACCATGCTCCAAAATGC  
CTTGCAAACCTGACCAAGCCGAGTCTAAGGACTTGATGAATATGGCGTTTTTTGTGCGGATTATCGGGCTTGGCGTGTTGC  
CAAGTATCTTGGTGGCGTGGGTCAAGGTGGATTATCCGACATTGGGTAAGAGTCTGATTCAGCGTGCGATGACTTGGGGT  
GTGGCAGTGGTGATGGCACTTGTGCCGATTTTGGCATTTAGTAGTCACTACGCCAGTTTCTTTCGTGAACATAAGCCACT  
GCGTAGCTATGTCAATCCCGTGATGCCGATTTATTCAGTAGGTAAGCTTGCCAGTATTGAGTACAAAAAAGCCACCGCGC  
CAAAAGACACCATCTATCATGCCAAAGATGCTGTACAGACGACGACGCCTGCCGAGCGTAAGCCACGACTCGTGGTGTTTC  
GTCGTCGGTGAGACGGCTCGAGCTGACCATGTGCAGTTTAATGGCTATAGTCGTGAGACTTTTCCGCAGCTTGCCAAGAT  
TGACAACCTAGCCAATTTTAGCCAAGTGACATCGTGTGGCACATCGACGGCGTACTCTGTGCCGTGTATGTTTCAGTTATC  
TGGGTCAAGATGACTATGATGTCGATACCGCCAAATACCAAGAAAACGTGCTGGATACGCTTGACCGACTGGGTGTGGGT  
ATCCTGTGGCGGGATAATAATTCAGACTCAAAGGCGTGATGGATAAACTGCCTGCTTCGCAGTATTTTGATTATAAATC

AGCGACCAACAACACCATCTGTAACACCAATCCTTACAACGAATGTCGTGATGTCGGTATGTTGGTGGGGCTAGATGATT  
ATGTGAGTACCAATCAAGGCAAAGATATGCTCATCATGCTACACCAAATGGGTAATCATGGGCCGGCGTACTTCAAGCGT  
TATGACGAGCAATTTGCCAAATACACCCCTGTGTGCGAAGGTAATGAACTTGCCAAGTGTGAACACCAATCGCTCATCAA  
CGCCTATGATAATGCACTGCTTGCAGCCGATGATTTTATCGCCAAAAGTATCGATTGGCTAAAAACGCATCAGGCCAACT  
ATGATGTTGCCATGCTCTATGTCAGCGACCACGGCGAGAGTCTGGGTGAAAATGGCGTCTATCTGCATGGTATGCCAAAT  
GCCTTTGCACCAAAAAGAACAGCGAGCGGTACCGGCATTCTTTTGGTCAAATAATCCATCGTTCACGCCAACTGCCAGCGA  
CACTGTGCTGACACATGATGCGATTACGCCGACTCTACTGAAGCTGTTTGATGTCACAGCGGATAAGGTCAAAGACCGCA  
CCGCATTCATCCGCTGA

>Uncultured\_bacterium\_MCR-2.6\_32

ATGACATCACAGCACTCTTGGTATCGCTACTCCATCAATCCCTTTGTACTGATGGGTTTGGTGGCGTTATTTTTGGCAGC  
GACAGCGAACCTGGCATTTTTTTGAAAAAGCGATGGCGGTCTATCCTGTATCGGATAACTTAGGCTTTATCATCTCAATGG  
CGGTTGCACTGATGGGTGCTATGCTATTGATTGTCGTGCTGTTATCCTATCGCTATGTGCTAAAGCCTGTGCTGATTTTG  
CTACTGATTATGGGTGCAGTGACGAGCTATTTTACCGATACTTATGGCACGGTCTATGACACCACCATGCTCCAAAATGC  
CATGCAAACCGACCAAGCCGAGTCTAAGGACTTGATGAATTTGGCGTTTTTTGTGCGGATTATCGGGCTTGGTGTGTTGC  
CAAGTGTGTTGGTCGCAGTTGCCAAAGTCAATTATCCAACATGGGGCAAAGGCCTGATTCAGCGTGCGATGACGTGGGGT  
GTCAGCCTTGCGCTGTTGCTTGTGCCGATTGGGCTATTTAGCAGCCAGTATGCGAGTTTCTTTCGTGTGCATAAGCCAGT  
GCGTTTTTATATCAACCCGATTACGCCGATTTATTCGGTGGGCAAGCTTGCCAGTATCGAGTACAAAAAAGCCACTGCAC



CAACAGACACCATCTATCATGCCAAAGATGCCGTACAGACCACCAAGCCTAGCGAGCGTAAGCCCCGTCTAGTGGTGTTT  
GTCGTCGGTGAGACGGCGCGTGCTGACCATGTGCAGTTCAATGGCTATGGCCGTGAGACTTTCCACAGCTTGCTAAAGT  
TGATGGCTTGGCGAACTTTAGCCAAGTGACATCGTGTGGCACATCGACAGCGTATTCTGTGCCGTGTATGTTTAGCTATT  
TGGGTCAAGATGACTATGATGTCGATACCGCCAAATACCAAGAAAATGTGCTAGATACGCTTGACCGCTTGGGCGTGGGT  
ATCTTGTGGCGTGATAATAATTCAGACTCAAAAGGTGTGATGGATAAGCTACCTGCCACGCAGTATTTTGATTATAAATC  
AGCGACCAACAACACCATCTGTAACACCAATCCTTATAACGAATGTCGTGATGTTGGTATGCTTGTCTGGGCTAGATGACT  
ATGTCAGCGCCAATAATGGCAAAGATATGCTCATCATGCTACACCAAATGGGCAATCATGGGCCGGCGTACTTTAAGCGT  
TATGATGAGCAATTTGCCAAATTCACCCCTGTGTGCGAAGGCAACGAGCTTGCCAAATGCGAACATCAATCGCTCATCAA  
TGCCTATGATAATGCGCTACTTGCCACCGATGATTTTATCGCCAAAAGTATCGATTGGCTAAAAACACATGAAGCGAACT  
ATGATGTCGCCATGCTCTATGTCAGCGACCACGGCGAGAGCTTGGGTGAGAATGGCGTCTATTTGCACGGTATGCCAAAT  
GCCTTTGCGCCAAAAGAACAGCGAGCCGTACCTGCATTTTTTTGGTCAAATAATACGACATTTAAGCCAACTGCCAGCGA  
TACTGCATTGACCCATGATGCGATTACGCCGACACTGCTTAAGCTGTTTGATGTCACAGCCGACAAGGTCAAAGACCGCA  
CGGCATTTATCCAGTAA

>Uncultured\_bacterium\_33

TTTCTCATGATGCAGCATACTTCTGTGTGGTACCGACGCTCGGTCAGTCCGTTTGTTCCTTGTGGCGAGTGTTGCCGTTTT  
CTTGACCGCGACCGCCAATCTTACCTTTTTTGATAAAATCAGCCAAACCTATCCCATCGCGGACAATCTCGGCTTTATGC  
TGACGATCGCTGTCGTGCTCTTTGGCGCGATGCTACTGATCACCACGCTGTTATCATCGTATCGCTATGTGCTAAAGCCT  
GTGTTGATTTTGCTATTAATCATGGGCGCGGTGACCAGTTATTTTACTGACACTTATGGCACGGTCTATGATACGACCAT

GCTCCAAAATGCCCTACAGACCGACCAAGCCGAGACCAAGGATCTATTAAACGCAGCGTTTATCATGCGTATCATTGGTT  
TGGGTGTGCTACCAAGTTTGCTTGTGGCTTTTGTAAAGGTGGATTATCCGACTTGGGGCAAGGGTTTGATGCGCCGATTG  
GGCTTGATCGTGGCAAGTCTTGCGCTGATTTTACTGCCTGTGGTGGCGTTCAGCAGTCATTATGCCAGTTTCTTTCGCGT  
GCATAAGCCGCTGCGTAGCTATGTCAATCCGATCAT

>Uncultured\_bacterium\_34

CAGCATACTTCTGTGTGGTACCGACGCTCGGTCAGTCCGTTTGTTCCTTGTGGCGAGTGTTGCCGTTTCTTGACCGCGAC  
CGCCAATCTTACCTTTTTTGATAAAATCAGCCAAACCTATCCCATCGCGGACAATCTCGGCTTTGTGCTGACGATCGCTG  
TCGTGCTCTTTGGCGCGATGCTACTGATCACCACGCTGTTATCATCGTATCGCTATGTGCTAAAGCCTGTGTTGATTTTG  
CTATTAATCATGGGCGCGGTGACCAGTTATTTTACTGACACTTATGGCACGGTCTATGATACGACCATGCTCCAAAATGC  
CCTACAGACCGACCAAGCCGAGACCAAGGATCTATTAAACGCAGCGTTTATCATGCGTATCATTGGTTTGGGTGTGCTAC  
CAAGTTTGCTTGTGGCTTTTGTAAAGGTGGATTATCCGACTTGGGGCAAGGGTTTGATGCGCCGATTGGGCTTGATCGTG  
GCAAGTCTTGCGCTGATTTTACTGCCTGTGGTGGCGTTCAGCAGTCATTATGCCAGTTTCTTTCGCGTGCATAAGCCGCT  
GCGTAGCTATGTCA

>Uncultured\_bacterium\_35

CAGCATACTTCTGTGTGGTACCGACGCTCGGTCAGTCCGTTTGTTCCTTGTGGCGAGTGTTGCCGTTTCTTGACCGCGAC  
CGCCAATCTTACCTTTTTTGATAAAATCAGCCAAACCTATCCCATCGCGGACAATCTCGGCTTTGTGCTGACGATCGCTG  
TCGTGCTCTTTGGCGCGATGCTACTGATCACCACGCTGTTATCATCGTATCGCTATGTGCTAAAGCCTGTGTTGATTTTG

CTATTAATCATGGGCGCGGTGACCAGTTATTTTACTGACACTTATGGCACGGTCTATGATACGACCATGCTCCAAAATGC  
CCTACAGACCGACCAAGCCGAGACCAAGGATCTATTAACGCAGCGTTTATCATGCGTATCATTGGTTTGGGTGTGCTAC  
CAAGTTTGCTTGTGGCTTTTGTAAAGGTGGATTATCCGACTTGGGGCAAGGGTTTGATGCGCCGATTGGGCTTGATCGTG  
GCAAGTCTTGCGCTGATTTTACTGCCTGTGGTGGCGTTCAGCAGTCATTATGCCAGTTTCTTTCGCGTGCATAA

>Uncultured\_bacterium\_36

CAGCATACTTCTGTGTGGTACCGACGCTCGGTCAGTCCGTTTGTTCCTTGTGGCGAGTGTTGCCGTTTTCTTGACCGCGAC  
CGCCAATCTTACCTTTTTTGATAAAATCAGCCAAACCTATCCCATCGCGGACAATCTCGGCTTTGTGCTGACGATCGCTG  
TCGTGCTCTTTGGCGCGATGCTACTGATCACCACGCTGTTATCATCGTATCGCTATGTGCTAAAGCCTGTGTTGATTTTG  
CTATTAATCATGGGCGCGGTGACCAGTTATTTTACTGACACTTATGGCACGGTCTATGATACGACCATGCTCCAAAATGC  
CCTACAGACCGACCAAGCCGAGACCAAGGATCTATTAACGCAGCGTTTATCATGCGTATCATTGGTTTGGGTGTGCTAC  
CAAGTTTGCTTGTGGCTTTTGTAAAGGTGGATTATCCGACTTGGGGCAAGGGTTTGATGCGCCGATTGGGCTTGATCGTG  
GCAAGTCTTGCGCTGATTTTACTGCCTGTGGTGGCGTTCAGCAGTCATTATGCCAGTTTCTTTCGCGTGCATAA

>Uncultured\_bacterium\_37

CAGCATACTTCTGTGTGGTACCGACGCTCGGTCAGTCCGTTTGTTCCTTGTGGCGAGTGTTGCCGTTTTCTTGACCGCGAC  
CGCCAATCTTACCTTTTTTGATAAAATCAGCCAAACCTATCCCATCGCGGACAATCTCGGCTTTGTGCTGACGATCGCTG  
TCGTGCTCTTTGGCGCGATGCTACTGATCACCACGCTGTTATCATCGTATCGCTATGTGCTAAAGCCTGTGTTGATTTTG

CTATTAATCATGGGCGCGGTGACCAGTTATTTTACTGACACTTATGGCACGGTCTATGATACGACCATGCTCCAAAATGC  
CCTACAGACCGACCAAGCCGAGACCAAGGATCTATTAAACGCAGCGTTTATCATGCGTATCATTGGTTTGGGTGTGCTAC  
CAAGTTTGCTTGTGGCTTTTGTAAAGGTGGATTATCCGACTTGGGGCAAGGGTTTGATGCGCCGATTGGGCTTGATCGTG  
GCAAGTCTTGCGCTGATTTTACTGCCTGTGGTGGCGTTCAGCAGTCATTATGCCAGTTTCTTTCGCGTGCATAA

>Uncultured\_bacterium\_38

CAGCATACTTCTGTGTGGTACCGACGCTCGGTTCAGTCCGTTTGTTCCTTGTGGCGAGTGTTGCCGTTTCTTGACCGCGAC  
CGCCAATCTTACCTTTTTTGATAAAATCAGCCAAACCTATCCCATCGCGGACAATCTCGGCTTTGTGCTGACGATCGCTG  
TCGTGCTCTTTGGCGCGATGCTACTGATCACCACGCTGTTATCATCGTATCGCTATGTGCTAAAGCCTGTGTTGATTTTG  
CTATTAATCATGGGCGCGGTGACCAGTTATTTTACTGACACTTATGGCACGGTCTATGATACGACCATGCTCCAAAATGC  
CCTACAGACCGACCAAGCCGAGACCAAGGATCTATTAAACGCAGCGTTTATCATGCGTATCATTGGTTTGGGTGTGCTAC  
CAAGTTTGCTTGTGGCTTTTGTAAAGGTGGATTATCCGACTTGGGGCAAGGGTTTGATGCGCCGATTGGGCTTGATCGTG  
GCAAGTCTTGCGCTGATTTTACTGCCTGTGGTGGCGTTCAGCAGTCATTATGCCAGTTTCTTTCGCGTGCATA

>Uncultured\_bacterium\_39

CAGCATACTTCTGTGTGGTACCGACGCTCGGTTCAGTCCGTTTGTTCCTTGTGGCGAGTGTTGCCGTTTCTTGACCGCGAC  
CGCCAATCTTACCTTTTTTGATAAAATCAGCCAAACCTATCCCATCGCGGACAATCTCGGCTTTGTGCTGACGATCGCTG

TCGTGCTCTTTGGCGCGATGCTACTGATCACCACGCTGTTATCATCGTATCGCTATGTGCTAAAGCCTGTGTTGATTTTG  
CTATTAATCATGGGCGCGGTGACCAGTTATTTTACTGACACTTATGGCACGGTCTATGATACGACCATGCTCCAAAATGC  
CCTACAGACCGACCAAGCCGAGACCAAGGATCTATTAAACGCAGCGTTTATCATGCGTATCATTGGTTTGGGTGTGCTAC  
CAAGTTTGCTTGTGGCTTTTGTAAAGGTGGATTATCCGACTTGGGGCAAGGGTTTGATGCGCCGATTGGGCTTGATCGTG  
GCAAGTCTTGCGCTGATTTTACTGCCTGTGGTGGCGTTCAGCAGTCATTATGCCAGTTTCTTTCGCGTGCATA

>Uncultured\_bacterium\_40

CAGCATACTTCTGTGTGGTACCGACGCTCGGTCAGTCCGTTTGTTCCTTGTGGCGAGTGTTGCCGTTTTCTTGACCGCGAC  
CGCCAATCTTACCTTTTTTTGATAAAATCAGCCAAACCTATCCCATCGCGGACAATCTCGGCTTTGTGCTGACGATCGCTG  
TCGTGCTCTTTGGCGCGATGCTACTGATCACCACGCTGTTATCATCGTATCGCTATGTGCTAAAGCCTGTGTTGATTTTG  
CTATTAATCATGGGCGCGGTGACCAGTTATTTTACTGACACTTATGGCACGGTCTATGATACGACCATGCTCCAAAATGC  
CCTACAGACCGACCAAGCCGAGACCAAGGATCTATTAAACGCAGCGTTTATCATGCGTATCATTGGTTTGGGTGTGCTAC  
CAAGTTTGCTTGTGGCTTTTGTAAAGGTGGATTATCCGACTTGGGGCAAGGGTTTGATGCGCCGATTGGGCTTGATCGTG  
GCAAGTCTTGCGCTGATTTTACTGCCTGTGGTGGCGTTCAGCAGTCATTATGCCAGTTTCTTTCGCGTGCATA

>Uncultured\_bacterium\_41

CAGCATACTTCTGTGTGGTACCGACGCTCGGTCAGTCCGTTTGTTCCTTGTGGCGAGTGTTGCCGTTTTCTTGACCGCGAC

CGCCAATCTTACCTTTTTTGATAAAATCAGCCAAACCTATCCCATCGCGGACAATCTCGGCTTTGTGCTGACGATCGCTG  
TCGTGCTCTTTGGCGCGATGCTACTGATCACCACGCTGTTATCATCGTATCGCTATGTGCTAAAGCCTGTGTTGATTTTG  
CTATTAATCATGGGCGCGGTGACCAGTTATTTTACTGACACTTATGGCACGGTCTATGATACGACCATGCTCCAAAATGC  
CCTACAGACCGACCAAGCCGAGACCAAGGATCTATTAACGCAGCGTTTATCATGCGTATCATTGGTTTGGGTGTGCTAC  
CAAGTTTGCTTGTGGCTTTTGTTAAGGTGGATTATCCGACTTGGGGCAAGGGTTTGATGCGCCGATTGGGCTTGATCGTG  
GCAAGTCTTGCGCTGATTTTACTGCCTGTGGTGGCGTTCAGCAGTCATTATGCCAGTTTCTTTCGCGTGCATA

>Uncultured\_bacterium\_42

CAGCATACTTCTGTGTGGTACCGACGCTCGGTCAGTCCGTTTGTTCTTGTGGCGAGTGTTGCCGTTTTCTTGACCGCGAC  
CGCCAATCTTACCTTTTTTGATAAAATCAGCCAAACCTATCCCATCGCGGACAATCTCGGCTTTGTGCTGACGATCGCTG  
TCGTGCTCTTTGGCGCGATGCTACTGATCACCACGCTGTTATCATCGTATCGCTATGTGCTAAAGCCTGTGTTGATTTTG  
CTATTAATCATGGGCGCGGTGACCAGTTATTTTACTGACACTTATGGCACGGTCTATGATACGACCATGCTCCAAAATGC  
CCTACAGACCGACCAAGCCGAGACCAAGGATCTATTAACGCAGCGTTTATCATGCGTATCATTGGTTTGGGTGTGCTAC  
CAAGTTTGCTTGTGGCTTTTGTTAAGGTGGATTATCCGACTTGGGGCAAGGGTTTGATGCGCCGATTGGGCTTGATCGTG  
GCAAGTCTTGCGCTGATTTTACTGCCTGTGGTGGCGTTCAGCAGTCATTATGCCAGTTTCTTTCGCGTGCATA

>Uncultured\_bacterium\_43

CAGCATACTTCTGTGTGGTACCGACGCTCGGTCAGTCCGTTTGTTCCTTGTGGCGAGTGTTGCCGTTTTCTTGACCGCGAC  
CGCCAATCTTACCTTTTTTGATAAAATCAGCCAAACCTATCCCATCGCGGACAATCTCGGCTTTGTGCTGACGATCGCTG  
TCGTGCTCTTTGGCGCGATGCTACTGATCACCACGCTGTTATCATCGTATCGCTATGTGCTAAAGCCTGTGTTGATTTTG  
CTATTAATCATGGGCGCGGTGACCAGTTATTTTACTGACACTTATGGCACGGTCTATGATACGACCATGCTCCAAAATGC  
CCTACAGACCGACCAAGCCGAGACCAAGGATCTATTAAACGCAGCGTTTATCATGCGTATCATTGGTTTGGGTGTGCTAC  
CAAGTTTGCTTGTGGCTTTTGTTAAGGTGGATTATCCGACTTGGGGCAAGGGTTTGATGCGCCGATTGGGCTTGATCGTG  
GCAAGTCTTGCGCTGATTTTACTGCCTGTGGTGGCGTTCAGCAGTCATTATGCCAGTTTCTTTCGCGTGCATA

>Uncultured\_bacterium\_44

CAGCATACTTCTGTGTGGTACCGACGCTCGGTCAGTCCGTTTGTTCCTTGTGGCGAGTGTTGCCGTTTTCTTGACCGCGAC  
CGCCAATCTTACCTTTTTTGATAAAATCAGCCAAACCTATCCCATCGCGGACAATCTCGGCTTTGTGCTGACGATCGCTG  
TCGTGCTCTTTGGCGCGATGCTACTGATCACCACGCTGTTATCATCGTATCGCTATGTGCTAAAGCCTGTGTTGATTTTG  
CTATTAATCATGGGCGCGGTGACCAGTTATTTTACTGACACTTATGGCACGGTCTATGATACGACCATGCTCCAAAATGC  
CCTACAGACCGACCAAGCCGAGACCAAGGATCTATTAAACGCAGCGTTTATCATGCGTATCATTGGTTTGGGTGTGCTAC  
CAAGTTTGCTTGTGGCTTTTGTTAAGGTGGATTATCCGACTTGGGGCAAGGGTTTGATGCGCCGATTGGGCTTGATCGTG  
GCAAGTCTTGCGCTGATTTTACTGCCTGTGGTGGCGTTCAGCAGTCATTATGCCAGTTTCTTTCGCGTGCAT

>Uncultured\_bacterium\_45

CAGCATACTTCTGTGTGGTACCGACGCTCGGTCAGTCCGTTTGTTCCTTGTGGCGAGTGTTGCCGTTTTCTTGACCGCGAC  
CGCCAATCTTACCTTTTTTGATAAAATCAGCCAAACCTATCCCATCGCGGACAATCTCGGCTTTGTGCTGACGATCGCTG  
TCGTGCTCTTTGGCGCGATGCTACTGATCACCACGCTGTTATCATCGTATCGCTATGTGCTAAAGCCTGTGTTGATTTTG  
CTATTAATCATGGGCGCGGTGACCAGTTATTTTACTGACACTTATGGCACGGTCTATGATACGACCATGCTCCAAAATGC  
CCTACAGACCGACCAAGCCGAGACCAAGGATCTATTAAACGCAGCGTTTATCATGCGTATCATTGGTTTGGGTGTGCTAC  
CAAGTTTGCTTGTGGCTTTTGTTAAGGTGGATTATCCGACTTGGGGCAAGGGTTTGATGCGCCGATTGGGCTTGATCGTG  
GCAAGTCTTGCGCTGATTTTACTGCCTGTGGTGGCGTTCAGCAGTCATTATGCCAGTTTCTTTCGCGTGCAT

>Uncultured\_bacterium\_46

CAGCATACTTCTGTGTGGTACCGACGCTCGGTCAGTCCGTTTGTTCCTTGTGGCGAGTGTTGCCGTTTTCTTGACCGCGAC  
CGCCAATCTTACCTTTTTTGATAAAATCAGCCAAACCTATCCCATCGCGGACAATCTCGGCTTTGTGCTGACGATCGCTG  
TCGTGCTCTTTGGCGCGATGCTACTGATCACCACGCTGTTATCATCGTATCGCTATGTGCTAAAGCCTGTGTTGATTTTG  
CTATTAATCATGGGCGCGGTGACCAGTTATTTTACTGACACTTATGGCACGGTCTATGATACGACCATGCTCCAAAATGC  
CCTACAGACCGACCAAGCCGAGACCAAGGATCTATTAAACGCAGCGTTTATCATGCGTATCATTGGTTTGGGTGTGCTAC  
CAAGTTTGCTTGTGGCTTTTGTTAAGGTGGATTATCCGACTTGGGGCAAGGGTTTGATGCGCCGATTGGGCTTGATCGTG  
GCAAGTCTTGCGCTGATTTTACTGCCTGTGGTGGCGTTCAGCAGTCATTATGCCAGTTTCTTTCGCGTG

>Uncultured\_bacterium\_47

TCTGTGTGGTACCGACGCTCGGTCAGTCCGTTTGTTCCTTGTGGCGAGTGTTGCCGTTTTCTTGACCGCGACCGCCAATCT



TACCTTTTTTGATAAAATCAGCCAAACCTATCCCATCGCGGACAATCTCGGCTTTGTGCTGACGATCGCTGTCGTGCTCT  
TTGGCGCGATGCTACTGATCACCACGCTGTTATCATCGTATCGCTATGTGCTAAAGCCTGTGTTGATTTTGCTATTAATC  
ATGGGCGCGGTGACCAGTTATTTTACTGACACTTATGGCACGGTCTATGATACGACCATGCTCCAAAATGCCCTACAGAC  
CGACCAAGCCGAGACCAAGGATCTATTAACGCAGCGTTTATCATGCGTATCATTGGTTTGGGTGTGCTACCAAGTTTGC  
TTGTGGCTTTTGTTAAGGTGGATTATCCGACTTGGGGCAAGGGTTTGATGCGCCGATTGGGCTTGATCGTGGCAAGTCTT  
GCGCTGATTTTACTGCCTGTGGTGGCGTTCAGCAGTCATTATGCCAGTTTCTTTCGCGTGCATA

>Uncultured\_bacterium\_48

CAGCATACTTCTGTGTGGTACCGACGCTCGGTCAGTCCGTTTGTTCTTGTGGCGAGTGTTGCCGTTTTCTTGACCGCGAC  
CGCCAATCTTACCTTTTTTGATAAAATCAGCCAAACCTATCCCATCGCGGACAATCTCGGCTTTGTGCTGACGATCGCTG  
TCGTGCTCTTGGCGCGCTGCTACTGATCACCACGCTGTTATCATCGTATCGCTATGTGCTAAAGCCTGTGTTGATTTG  
CTATTAATCATGGGCGCGGTGACCAGTTATTTTACTGACACTTATGGCACGGTCTATGATACGACCATGCTCCAAAATGC  
CCTACAGACCGACCAAGCCGAGACCAAGGATCTATTAACGCAGCGTTTATCATGCGTATCATTGGTTTGGGTGTGCTAC  
CAAGTTTGCTTGTGGCTTTTGTTAAGGTGGATTATCCGACTTGGGGCAAGGGTTTGATGCGCCGATTGGGCTTGATCGTG  
GCAAGTCTTGCGCTGATTTTACTGCCTGTGGTGGCGTTCAGCAGTCATTATGCCAGTTTCTTTCGCG

>Uncultured\_bacterium\_49

CAGCATACTTCTGTGTGGTACCGACGCTCGGTTCAGTCCGTTTGTTCCTTGTGGCGAGTGTTGCCGTTTTCTTGACCGCGAC  
CGCCAATCTTACCTTTTTTGATAAAATCAGCCAAACCTATCCCATCGCGGACAATCTCGGCTTTGTGCTGACGATCGCTG  
TCGTGCTCTTTGGCGCGATGCTACTGATCACCACGCTGTTATCATCGTATCGCTATGTGCTAAAGCCTGTGTTGATTTTG  
CTATTAATCATGGGCGCGGTGACCAGTTATTTTACTGACACTTATGGCACGGTCTATGATACGACCATGCTCCAAAATGC  
CCTACAGACCGACCAAGCCGAGACCAAGGATCTATTAAACGCAGCGTTTATCATGCGTATCATTGGTTTGGGTGTGCTAC  
CAAGTTTGCTTGTGGCTTTTGTAAAGGTGGATTATCCGACTTGGGGCAAGGGTTTGATGCGCCGATTGGGCTTGATCGTG  
GCAAGTCTTGCGCTGATTTTACTGCCTGTGGTGGCGTTCAGCAGTCATTATGCCAGTTTCTTTC

>Uncultured\_bacterium\_50

CAGCATACTTCTGTGTGGTACCGACGCTCGGTTCAGTCCGTTTGTTCCTTGTGGCGAGTGTTGCCGTTTTCTTGACCGCGAC  
CGCCAATCTTACCTTTTTTGATAAAATCAGCCAAACCTATCCCATCGCGGACAATCTCGGCTTTGTGCTGACGATCGCTG  
TCGTGCTCTTTGGCGCGATGCTACTGATCACCACGCTGTTATCATCGTATCGCTATGTGCTAAAGCCTGTGTTGATTTTG  
CTATTAATCATGGGCGCGGTGACCAGTTATTTTACTGACACTTATGGCACGGTCTATGATACGACCATGCTCCAAAATGC  
CCTACAGACCGACCAAGCCGAGACCAAGGATCTATTAAACGCAGCGTTTATCATGCGTATCATTGGTTTGGGTGTGCTAC  
CAAGTTTGCTTGTGGCTTTTGTAAAGGTGGATTATCCGACTTGGGGCAAGGGTTTGATGCGCCGATTGGGCTTGATCGTG  
GCAAGTCTTGCGCTGATTTTACTGCCTGTGGTGGCGTTCAGCAGTCATTATGCCAGTTTCTTT

>Uncultured\_bacterium\_50

ACTTCTGTGTGGTACCGACGCTCGGTCAGTCCGTTTGTTCCTTGTGGCGAGTGTTGCCGTTTTCTTGACCGCGACCGCCAA  
TCTTACCTTTTTTGATAAAATCAGCCAAACCTATCCCATCGCGGACAATCTCGGCTTTGTGCTGACGATCGCTGTCGTGC  
TCTTTGGCGCGATGCTACTGATCACCACGCTGTTATCATCGTATCGCTATGTGCTAAAGCCTGTGTTGATTTTGCTATTA  
ATCATGGGCGCGGTGACCAGTTATTTTACTGACACTTATGGCACGGTCTATGATACGACCATGCTCCAAAATGCCCTACA  
GACCGACCAAGCCGAGACCAAGGATCTATTAAACGCAGCGTTTATCATGCGTATCATTGGTTTGGGTGTGCTACCAAGTT  
TGCTTGTGGCTTTTGTTAAGGTGGATTATCCGACTTGGGGCAAGGGTTTGATGCGCCGATTGGGCTTGATCGTGGCAAGT  
CTTGCGCTGATTTTACTGCCTGTGGTGGCGTTCAGCAGTCATTATGCCAGTTTCTTTC
