# Supplementary material for: Molecular Detection of Colistin Resistance mcr-1 Gene in Multidrug-Resistant Escherichia coli Isolated from Chicken
Source: MDPI journal article supplement (doi:10.3390/antibiotics11010097), 2022-01-13
Supplement: s1 [file s1]

**Supplementary File S2:** A total of 91 MCR-1 proteins of *E. coli* origin retrieved from NCBI database.

>strain\_L40\_MCR-1.1\_Nigeria\_1

ATGATGCAGCATACTTCTGTGTGGTACCGACGCTCGGTCAGTCCGTTTGTTCCTTGTGGCGAGTGTTGCCGTTTTCTTGAC  
CGCGACCGCCAATCTTACCTTTTTTGATAAAATCAGCCAAACCTATCCCATCGCGGACAATCTCGGCTTTGTGCTGACGA  
TCGCTGTCGTGCTCTTTGGCGCGATGCTACTGATCACCACGCTGTTATCATCGTATCGCTATGTGCTAAAGCCTGTGTTG  
ATTTTGCTATTAATCATGGGCGCGGTGACCAGTTATTTTACTGACACTTATGGCACGGTCTATGATACGACCATGCTCCA  
AAATGCCCTACAGACCGACCAAGCCGAGACCAAGGATCTATTAAACGCAGCGTTTATCATGCGTATCATTGGTTTGGGTG  
TGCTACCAAGTTTGCTTGTGGCTTTTGTTAAGGTGGATTATCCGACTTGGGGCAAGGGTTTGATGCGCCGATTGGGCTTG  
ATCGTGGCAAGTCTTGCGCTGATTTTACTGCCTGTGGTGGCGTTCAGCAGTCATTATGCCAGTTTCTTTCGCGTGCATAA  
GCCGCTGCGTAGCTATGTCAATCCGATCATGCCAATCTACTCGGTGGGTAAGCTTGCCAGTATTGAGTATAAAAAAGCCA  
GTGCGCCAAAAGATACCATTTATCACGCCAAAGACGCGGTACAAGCAACCAAGCCTGATATGCGTAAGCCACGCCTAGTG  
GTGTTTCGTCGTCGGTGAGACGGCACGCGCCGATCATGTCAGCTTCAATGGCTATGAGCGCGATACTTCCCACAGCTTGC  
CAAGATCGATGGCGTGACCAATTTTAGCAATGTCACATCGTGCGGCACATCGACGGCGTATTCTGTGCCGTGTATGTTCA  
GCTATCTGGGCGCGGATGAGTATGATGTCGATACCGCCAAATACCAAGAAAATGTGCTGGATACGCTGGATCGCTTGGGC  
GTAAGTATCTTGTGGCGTGATAATAATTCGGACTCAAAAGGCGTGATGGATAAGCTGCCAAAAGCGCAATTTGCCGATTA  
TAAATCCGCGACCAACAACGCCATCTGCAACACCAATCCTTATAACGAATGCCGCGATGTCCGTATGCTCGTTGGCTTAG  
ATGACTTTGTGCTGCCAATAACGGCAAAGATATGCTGATCATGCTGCACCAAATGGGCAATCACGGGCCTGCGTATTTT  
AAGCGATATGATGAAAAGTTTGCCAAATTCACGCCAGTGTGTGAAGGTAATGAGCTTGCCAAGTGCGAACATCAGTCCTT

GATCAATGCTTATGACAATGCCTTGCTTGCCACCGATGATTTTCATCGCTCAAAGTATCCAGTGGCTGCAGACGCACAGCA  
ATGCCTATGATGTCTCAATGCTGTATGTCAGCGATCATGGCGAAAGTCTGGGTGAGAACGGTGTCTATCTACATGGTATG  
CCAAATGCCTTTGCACCAAAAGAACAGCGCAGTGTGCCTGCATTTTTCTGGACGGATAAGCAAACCTGGCATCACGCCAAT  
GGCAACCGATACCGTCCTGACCCATGACGCGATCACGCCGACATTATTAAAGCTGTTTGATGTCACCGCGGACAAAGTCA  
AAGACCGCACCGCATTTCATCCGCTGA

>strain\_L39\_MCR-1.1\_Nigeria\_2

ATGATGCAGCATACTTCTGTGTGGTACCGACGCTCGGTTCAGTCCGTTTGTTCCTGTGGCGAGTGTTGCCGTTTTCTTGAC  
CGCGACCGCCAATCTTACCTTTTTTGATAAAATCAGCCAAACCTATCCCATCGCGGACAATCTCGGCTTTGTGCTGACGA  
TCGCTGTCGTGCTCTTTGGCGCGATGCTACTGATCACCACGCTGTTATCATCGTATCGCTATGTGCTAAAGCCTGTGTTG  
ATTTTGCTATTAATCATGGGCGCGGTGACCAGTTATTTTACTGACACTTATGGCACGGTCTATGATACGACCATGCTCCA  
AAATGCCCTACAGACCGACCAAGCCGAGACCAAGGATCTATTAAACGCAGCGTTTATCATGCGTATCATTGGTTTGGGTG  
TGCTACCAAGTTTGCTTGTGGCTTTTGTTAAGGTGGATTATCCGACTTGGGGCAAGGGTTTGATGCGCCGATTGGGCTTG  
ATCGTGGCAAGTCTTGCGCTGATTTTACTGCCTGTGGTGGCGTTCAGCAGTCATTATGCCAGTTTCTTTTCGCGTGCATAA  
GCCGCTGCGTAGCTATGTCAATCCGATCATGCCAATCTACTCGGTGGGTAAAGCTTGCCAGTATTGAGTATAAAAAAGCCA  
GTGCGCCAAAAGATACCATTATCACGCCAAAGACGCGGTACAAGCAACCAAGCCTGATATGCGTAAGCCACGCCTAGTG  
GTGTTTCGTGTCGGTGAGACGGCACGCGCCGATCATGTCAGCTTCAATGGCTATGAGCGCGATACTTTCCACAGCTTGC  
CAAGATCGATGGCGTGACCAATTTTAGCAATGTCACATCGTGCGGCACATCGACGGCGTATTCTGTGCCGTGTATGTTCA  
GCTATCTGGGCGCGGATGAGTATGATGTCGATACCGCCAAATACCAAGAAAATGTGCTGGATACGCTGGATCGCTTGGGC

GTAAGTATCTTGTGGCGTGATAATAATTCGGACTCAAAAGGCGTGATGGATAAGCTGCCAAAAGCGCAATTTGCCGATTA  
TAAATCCGCGACCAACAACGCCATCTGCAACACCAATCCTTATAACGAATGCCGCGATGTCGGTATGCTCGTTGGCTTAG  
ATGACTTTTGTGCTGCCAATAACGGCAAAGATATGCTGATCATGCTGCACCAAATGGGCAATCACGGGCCTGCGTATTTT  
AAGCGATATGATGAAAAGTTTGCCAAATTCACGCCAGTGTGTGAAGGTAATGAGCTTGCCAAGTGCGAACATCAGTCCTT  
GATCAATGCTTATGACAATGCCTTGCTTGCCACCGATGATTTTCATCGCTCAAAGTATCCAGTGGCTGCAGACGCACAGCA  
ATGCCTATGATGTCTCAATGCTGTATGTCAGCGATCATGGCGAAAGTCTGGGTGAGAACGGTGTCTATCTACATGGTATG  
CCAAATGCCTTTGCACCAAAAGAACAGCGCAGTGTGCCTGCATTTTTCTGGACGGATAAGCAAACCTGGCATCACGCCAAT  
GGCAACCGATACCGTCCTGACCCATGACGCGATCACGCCGACATTATTAAAGCTGTTTGATGTCACCGCGGACAAAGTCA  
AAGACCGCACCGCATTCATCCGCTGA

>MT070408.1 Escherichia coli strain L36 phosphoethanolamine--lipid A transferase MCR-1.1 (mcr-1) gene, mcr-1.1 allele, complete cds

ATGATGCAGCATACTTCTGTGTGGTACCGACGCTCGGTCAGTCCGTTTGTTCTTGTGGCGAGTGTTGCCGTTTTCTTGAC  
CGCGACCGCCAATCTTACCTTTTTTGATAAAATCAGCCAAACCTATCCCATCGCGGACAATCTCGGCTTTGTGCTGACGA  
TCGCTGTCGTGCTCTTTGGCGCGATGCTACTGATCACCACGCTGTTATCATCGTATCGCTATGTGCTAAAGCCTGTGTTG  
ATTTTGCTATTAATCATGGGCGCGGTGACCAGTTATTTTACTGACACTTATGGCACGGTCTATGATACGACCATGCTCCA  
AAATGCCCTACAGACCGACCAAGCCGAGACCAAGGATCTATTAAACGCAGCGTTTATCATGCGTATCATTGGTTTGGGTG  
TGCTACCAAGTTTGCTTGTGGCTTTTGTTAAGGTGGATTATCCGACTTGGGGCAAGGGTTTGATGCGCCGATTGGGCTTG  
ATCGTGGCAAGTCTTGCGCTGATTTTACTGCCTGTGGTGGCGTTCAGCAGTCATTATGCCAGTTTCTTTCGCGTGCATAA  
GCCGCTGCGTAGCTATGTCAATCCGATCATGCCAATCTACTCGGTGGGTAAAGCTTGCCAGTATTGAGTATAAAAAAGCCA  
GTGCGCCAAAAGATACCATTATCACGCCAAAGACGCGGTACAAGCAACCAAGCCTGATATGCGTAAGCCACGCCTAGTG

GTGTTCTGTCGTCGGTGAGACGGCACGCGCCGATCATGTCAGCTTCAATGGCTATGAGCGCGATACTTTCCCACAGCTTGC  
CAAGATCGATGGCGTGACCAATTTTAGCAATGTCACATCGTGCGGCACATCGACGGCGTATTCTGTGCCGTGTATGTTCA  
GCTATCTGGGCGCGGATGAGTATGATGTCGATACCGCCAAATACCAAGAAAATGTGCTGGATACGCTGGATCGCTTGGGC  
GTAAGTATCTTGTGGCGTGATAATAATTCGGACTCAAAGGGCGTGATGGATAAGCTGCCAAAAGCGCAATTTGCCGATTA  
TAAATCCGCGACCAACAACGCCATCTGCAACACCAATCCTTATAACGAATGCCGCGATGTCGGTATGCTCGTTGGCTTAG  
ATGACTTTGTGCTGCCAATAACGGCAAAGATATGCTGATCATGCTGCACCAAATGGGCAATCACGGGCCTGCGTATTTT  
AAGCGATATGATGAAAAGTTTGCCAAATTCACGCCAGTGTGTGAAGGTAATGAGCTTGCCAAGTGCGAACATCAGTCCTT  
GATCAATGCTTATGACAATGCCTTGCTTGCCACCGATGATTTTCATCGCTCAAAGTATCCAGTGGCTGCAGACGCACAGCA  
ATGCCTATGATGTCTCAATGCTGTATGTCAGCGATCATGGCGAAAGTCTGGGTGAGAACGGTGTCTATCTACATGGTATG  
CCAAATGCCTTTGCACCAAAAGAACAGCGCAGTGTGCCTGCATTTTTCTGGACGGATAAGCAAACCTGGCATCACGCCAAT  
GGCAACCGATACCGTCCTGACCCATGACGCGATCACGCCGACATTATTAAAGCTGTTTGATGTCACCGCGGACAAAGTCA  
AAGACCGCACCGCATTTCATCCGCTGA

>MT070407.1 Escherichia coli strain L29 phosphoethanolamine--lipid A transferase MCR-1.1 (mcr-1) gene, mcr-1.1 allele, complete cds

ATGATGCAGCATACTTCTGTGTGGTACCGACGCTCGGTCAGTCCGTTTGTTCTTGTGGCGAGTGTTGCCGTTTTCTTGAC  
CGCGACCGCCAATCTTACCTTTTTTGATAAAATCAGCCAAACCTATCCCATCGCGGACAATCTCGGCTTTGTGCTGACGA  
TCGCTGTCGTGCTCTTTGGCGCGATGCTACTGATCACCACGCTGTTATCATCGTATCGCTATGTGCTAAAGCCTGTGTTG  
ATTTTGCTATTAATCATGGGCGCGGTGACCAGTTATTTTACTGACACTTATGGCACGGTCTATGATACGACCATGCTCCA  
AAATGCCCTACAGACCGACCAAGCCGAGACCAAGGATCTATTAAACGCAGCGTTTATCATGCGTATCATTGGTTTGGGTG  
TGCTACCAAGTTTGCTTGTGGCTTTTGTTAAGGTGGATTATCCGACTTGGGGCAAGGGTTTGATGCGCCGATTGGGCTTG

ATCGTGGCAAGTCTTGCGCTGATTTTACTGCCTGTGGTGGCGTTCAGCAGTCATTATGCCAGTTTCTTTCGCGTGCATAA  
GCCGCTGCGTAGCTATGTCAATCCGATCATGCCAATCTACTCGGTGGGTAAGCTTGCCAGTATTGAGTATAAAAAAGCCA  
GTGCGCCAAAAGATACCATTTATCACGCCAAAGACGCGGTACAAGCAACCAAGCCTGATATGCGTAAGCCACGCCTAGTG  
GTGTTTCGTCGTCGGTGAGACGGCACGCGCCGATCATGTCAGCTTCAATGGCTATGAGCGCGATACTTTCCCACAGCTTGC  
CAAGATCGATGGCGTGACCAATTTTAGCAATGTCACATCGTGCGGCACATCGACGGCGTATTCTGTGCCGTGTATGTTCA  
GCTATCTGGGCGCGGATGAGTATGATGTCGATACCGCCAAATACCAAGAAAATGTGCTGGATACGCTGGATCGCTTGGGC  
GTAAGTATCTTGTGGCGTGATAATAATTCGGACTCAAAGGCGTGATGGATAAGCTGCCAAAAGCGCAATTTGCCGATTA  
TAAATCCGCGACCAACAACGCCATCTGCAACACCAATCCTTATAACGAATGCCGCGATGTCGGTATGCTCGTTGGCTTAG  
ATGACTTTGTGCTGCCAATAACGGCAAAGATATGCTGATCATGCTGCACCAAATGGGCAATCACGGGCCTGCGTATTTT  
AAGCGATATGATGAAAAGTTTGCCAAATTCACGCCAGTGTGTGAAGGTAATGAGCTTGCCAAGTGCGAACATCAGTCCTT  
GATCAATGCTTATGACAATGCCTTGCTTGCCACCGATGATTTTCATCGCTCAAAGTATCCAGTGGCTGCAGACGCACAGCA  
ATGCCTATGATGTCTCAATGCTGTATGTCAGCGATCATGGCGAAAGTCTGGGTGAGAACGGTGTCTATCTACATGGTATG  
CCAAATGCCTTTGCACCAAAAGAACAGCGCAGTGTGCCTGCATTTTTCTGGACGGATAAGCAAACCTGGCATCACGCCAAT  
GGCAACCGATACCGTCCTGACCCATGACGCGATCACGCCGACATTATTAAAGCTGTTTGATGTCACCGCGGACAAAGTCA  
AAGACCGCACCGCATTTCATCCGCTGA

>MT070406.1 Escherichia coli strain L27 phosphoethanolamine--lipid A transferase MCR-1.1 (mcr-1) gene, mcr-1.1 allele, complete cds

ATGATGCAGCATACTTCTGTGTGGTACCGACGCTCGGTTCAGTCCGTTTGTTCCTTGTGGCGAGTGTTGCCGTTTTCTTGAC  
CGCGACCGCCAATCTTACCTTTTTTGATAAAATCAGCCAAACCTATCCCATCGCGGACAATCTCGGCTTTGTGCTGACGA  
TCGCTGTCGTGCTCTTTGGCGCGATGCTACTGATCACCACGCTGTTATCATCGTATCGCTATGTGCTAAAGCCTGTGTTG

ATTTTGCTATTAATCATGGGCGCGGTGACCAGTTATTTTACTGACACTTATGGCACGGTCTATGATACGACCATGCTCCA  
AAATGCCCTACAGACCGACCAAGCCGAGACCAAGGATCTATTAAACGCAGCGTTTATCATGCGTATCATTGGTTTGGGTG  
TGCTACCAAGTTTGCTTGTGGCTTTTGTAAAGGTGGATTATCCGACTTGGGGCAAGGGTTTGATGCGCCGATTGGGCTTG  
ATCGTGGCAAGTCTTGCGCTGATTTTACTGCCTGTGGTGGCGTTCAGCAGTCATTATGCCAGTTTCTTTCGCGTGCATAA  
GCCGCTGCGTAGCTATGTCAATCCGATCATGCCAATCTACTCGGTGGGTAAAGCTTGCCAGTATTGAGTATAAAAAAGCCA  
GTGCGCCAAAAGATACCATTTATCACGCCAAAGACGCGGTACAAGCAACCAAGCCTGATATGCGTAAGCCACGCCTAGTG  
GTGTTTCGTCGTCGGTGAGACGGCACGCGCCGATCATGTCAGCTTCAATGGCTATGAGCGCGATACTTTCCACAGCTTGC  
CAAGATCGATGGCGTGACCAATTTTAGCAATGTCACATCGTGCGGCACATCGACGGCGTATTCTGTGCCGTGTATGTTCA  
GCTATCTGGGCGCGGATGAGTATGATGTCGATACCGCCAAATACCAAGAAAATGTGCTGGATACGCTGGATCGCTTGGGC  
GTAAGTATCTTGTGGCGTGATAATAATTCGGA CTCAAAGGCGTGATGGATAAGCTGCCAAAAGCGCAATTTGCCGATTA  
TAAATCCGCGACCAACAACGCCATCTGCAACACCAATCCTTATAACGAATGCCGCGATGTCGGTATGCTCGTTGGCTTAG  
ATGACTTTGTCGCTGCCAATAACGGCAAAGATATGCTGATCATGCTGCACCAAATGGGCAATCACGGGCCTGCGTATTTT  
AAGCGATATGATGAAAAGTTTGCCAAATTCACGCCAGTGTGTGAAGGTAATGAGCTTGCCAAGTGCGAACATCAGTCCTT  
GATCAATGCTTATGACAATGCCTTGCTTGCCACCGATGATTTTCATCGCTCAAAGTATCCAGTGGCTGCAGACGCACAGCA  
ATGCCTATGATGTCTCAATGCTGTATGTCAGCGATCATGGCGAAAGTCTGGGTGAGAACGGTGTCTATCTACATGGTATG  
CCAAATGCCTTTGCACCAAAAGAACAGCGCAGTGTGCCTGCATTTTTCTGGACGGATAAGCAA ACTGGCATCACGCCAAT  
GGCAACCGATACCGTCCTGACCCATGACGCGATCACGCCGACATTATTAAAGCTGTTTGATGTCACCGCGGACAAAGTCA  
AAGACCGCACCGCATTTCATCCGCTGA

>MT070405.1 Escherichia coli strain L26 phosphoethanolamine--lipid A transferase MCR-1.1 (mcr-1) gene, mcr-1.1 allele, complete cds

ATGATGCAGCATACTTCTGTGTGGTACCGACGCTCGGTGAGTCCGTTTGTTCCTGTGGCGAGTGTTGCCGTTTTCTTGAC  
CGCGACCGCCAATCTTACCTTTTTTTGATAAAATCAGCCAAACCTATCCCATCGCGGACAATCTCGGCTTTGTGCTGACGA  
TCGCTGTCGTGCTCTTTGGCGCGATGCTACTGATCACCACGCTGTTATCATCGTATCGCTATGTGCTAAAGCCTGTGTTG  
ATTTTGCTATTAATCATGGGCGCGGTGACCAGTTATTTTACTGACACTTATGGCACGGTCTATGATACGACCATGCTCCA  
AAATGCCCTACAGACCGACCAAGCCGAGACCAAGGATCTATTAACGCAGCGTTTATCATGCGTATCATTGGTTTGGGTG  
TGCTACCAAGTTTGCTTGTGGCTTTTGTTAAGGTGGATTATCCGACTTGGGGCAAGGGTTTGATGCGCCGATTGGGCTTG  
ATCGTGGCAAGTCTTGCGCTGATTTTACTGCCTGTGGTGGCGTTCAGCAGTCATTATGCCAGTTTCTTTCGCGTGCATAA  
GCCGCTGCGTAGCTATGTCAATCCGATCATGCCAATCTACTCGGTGGGTAAAGCTTGCCAGTATTGAGTATAAAAAAGCCA  
GTGCGCCAAAAGATACCATTTATCACGCCAAAGACGCGGTACAAGCAACCAAGCCTGATATGCGTAAGCCACGCCTAGTG  
GTGTTTCGTCGTCGGTGAGACGGCACGCGCCGATCATGTCAGCTTCAATGGCTATGAGCGCGATACTTTCCACAGCTTGC  
CAAGATCGATGGCGTGACCAATTTTAGCAATGTCACATCGTGCGGCACATCGACGGCGTATTCTGTGCCGTGTATGTTCA  
GCTATCTGGGCGCGGATGAGTATGATGTCGATACCGCCAAATACCAAGAAAATGTGCTGGATACGCTGGATCGCTTGGGC  
GTAAGTATCTTGTGGCGTGATAATAATTCGGACTCAAAGGCGTGATGGATAAGCTGCCAAAAGCGCAATTTGCCGATTA  
TAAATCCGCGACCAACAACGCCATCTGCAACACCAATCCTTATAACGAATGCCGCGATGTCGGTATGCTCGTTGGCTTAG  
ATGACTTTGTGCTGCCAATAACGGCAAAGATATGCTGATCATGCTGCACCAAATGGGCAATCACGGGCCTGCGTATTTT  
AAGCGATATGATGAAAAGTTTGCCAAATTCACGCCAGTGTGTGAAGGTAATGAGCTTGCCAAGTGCGAACATCAGTCCTT  
GATCAATGCTTATGACAATGCCTTGCTTGCCACCGATGATTTTCATCGCTCAAAGTATCCAGTGGCTGCAGACGCACAGCA  
ATGCCTATGATGTCTCAATGCTGTATGTCAGCGATCATGGCGAAAGTCTGGGTGAGAACGGTGTCTATCTACATGGTATG  
CCAAATGCCTTTGCACCAAAAGAACAGCGCAGTGTGCCTGCATTTTTCTGGACGGATAAGCAAACCTGGCATCACGCCAAT

GGCAACCGATACCGTCCTGACCCATGACGCGATCACGCCGACATTATTAAAGCTGTTTGATGTCACCGCGGACAAAGTCA  
AAGACCGCACCGCATTTCATCCGCTGA

>MT070404.1 Escherichia coli strain L23 phosphoethanolamine--lipid A transferase MCR-1.1 (mcr-1) gene, mcr-1.1 allele, complete  
cds

ATGATGCAGCATACTTCTGTGTGGTACCGACGCTCGGTCAGTCCGTTTGTTCCTTGTGGCGAGTGTTGCCGTTTTCTTGAC  
CGCGACCGCCAATCTTACCTTTTTTGATAAAATCAGCCAAACCTATCCCATCGCGGACAATCTCGGCTTTGTGCTGACGA  
TCGCTGTCGTGCTCTTTGGCGCGATGCTACTGATCACCACGCTGTTATCATCGTATCGCTATGTGCTAAAGCCTGTGTTG  
ATTTTGCTATTAATCATGGGCGCGGTGACCAGTTATTTTACTGACACTTATGGCACGGTCTATGATACGACCATGCTCCA  
AAATGCCCTACAGACCGACCAAGCCGAGACCAAGGATCTATTAAACGCAGCGTTTATCATGCGTATCATTGGTTTGGGTG  
TGCTACCAAGTTTGCTTGTGGCTTTTGTAAAGGTGGATTATCCGACTTGGGGCAAGGGTTTGATGCGCCGATTGGGCTTG  
ATCGTGGCAAGTCTTGCGCTGATTTTACTGCCTGTGGTGGCGTTCAGCAGTCATTATGCCAGTTTCTTTCGCGTGCATAA  
GCCGCTGCGTAGCTATGTCAATCCGATCATGCCAATCTACTCGGTGGGTAAGCTTGCCAGTATTGAGTATAAAAAAGCCA  
GTGCGCCAAAAGATACCATTTATCACGCCAAAGACGCGGTACAAGCAACCAAGCCTGATATGCGTAAGCCACGCCTAGTG  
GTGTTTCGTCGTCGGTGAGACGGCACGCGCCGATCATGTCAGCTTCAATGGCTATGAGCGCGATACTTCCCACAGCTTGC  
CAAGATCGATGGCGTGACCAATTTTAGCAATGTCACATCGTGCGGCACATCGACGGCGTATTCTGTGCCGTGTATGTTCA  
GCTATCTGGGCGCGGATGAGTATGATGTCGATACCGCCAAATACCAAGAAAATGTGCTGGATACGCTGGATCGCTTGGGC  
GTAAGTATCTTGTGGCGTGATAATAATTCGGACTCAAAAGGCGTGATGGATAAGCTGCCAAAAGCGCAATTTGCCGATTA  
TAAATCCGCGACCAACAACGCCATCTGCAACACCAATCCTTATAACGAATGCCGCGATGTCGGTATGCTCGTTGGCTTAG  
ATGACTTTGTGCTGCCAATAACGGCAAAGATATGCTGATCATGCTGCACCAAATGGGCAATCACGGGCCTGCGTATTTT  
AAGCGATATGATGAAAAGTTTGCCAAATTCACGCCAGTGTGTGAAGGTAATGAGCTTGCCAAGTGCGAACATCAGTCCTT



GATCAATGCTTATGACAATGCCTTGCTTGCCACCGATGATTTTCATCGCTCAAAGTATCCAGTGGCTGCAGACGCACAGCA  
ATGCCTATGATGTCTCAATGCTGTATGTCAGCGATCATGGCGAAAGTCTGGGTGAGAACGGTGTCTATCTACATGGTATG  
CCAAATGCCTTTGCACCAAAAGAACAGCGCAGTGTGCCTGCATTTTTCTGGACGGATAAGCAAACCTGGCATCACGCCAAT  
GGCAACCGATAACCGTCCTGACCCATGACGCGATCACGCCGACATTATTAAAGCTGTTTGATGTCACCGCGGACAAAGTCA  
AAGACCGCACCGCATTTCATCCGCTGA

>MN879260.1 Escherichia coli strain SAUVM\_E7 phosphoethanolamine--lipid A transferase MCR-1.1 (mcr-1) gene, mcr-1.1 allele, partial cds

ATGATGCAGCATACTTCTGTGTGGTACCGACGCTCGGTCAGTCCGTTTGTTCTTGTGGCGAGTGTTGCCGTTTTCTTGAC  
CGCGACCGCCAATCTTACCTTTTTTGATAAAATCAGCCAAACCTATCCCATCGCGGACAATCTCGGCTTTGTGCTGACGA  
TCGCTGTCGTGCTCTTTGGCGCGATGCTACTGATCACCACGCTGTTATCATCGTATCGCTATGTGCTAAAGCCTGTGTTG  
ATTTTGCTATTAATCATGGGCGCGGTGACCAGTTATTTTACTGACACTTATGGCACGGTCTATGATACGACCATGCTCCA  
AAATGCCCTACAGACCGACCAAGCCGAGACCAAGGATCTATTAAACGCAGCGTTTATCATGCGTATCATTGGTTTGGGTG  
TGCTACCAAGTTTGCTTGTGGCTTTTGTTAAGGTGGATTATCCGACTTGGGGCAAGGGTTTGATGCGCCGATTGGGCTTG  
ATCGTGGCAAGTCTTGCGCTGATTTTACTGCCTGTGGTGGCGTTCAGCAGTCATTATGCCAGTTTCTTTGCGGTGCATAA  
GCCGCTGCGTAGCTATGTCAATCCGATCATGCCAATCTACTCGGTGGGTAAAGCTTGCCAGTATTGAGTATAAAAAAGCCA  
GTGCGCCAAAAGATAACCATTTATCACGCCAAAGACGCGGTACAAGCAACCAAGCCTGATATGCGTAAGCCACGCCTAGTG  
GTGTTTCGTCGTGCGTGAGACGGCACGCGCCGATCATGTCAGCTTCAATGGCTATGAGCGCGATACTTTCCACAGCTTGC  
CAAGATCGATGGCGTGACCAATTTTAGCAATGTCACATCGTGCGGCACATCGACGGCGTATTCTGTGCCGTGTATGTTCA  
GCTATCTGGGCGCGGATGAGTATGATGTCGATACCGCCAAATACCAAGAAAATGTGCTGGATACGCTGGATCGCTTGGGC  
GTAAGTATCTTGTGGCGTGATAATAATTCGGAATCAAAGGCGTGATGGATAAGCTGCCAAAAGCGCAATTTGCCGATTA

TAAATCCGCGACCAACAACGCCATCTGCAACACCAATCCTTATAACGAATGCCGCGATGTCGGTATGCTCGTTGGCTTAG  
ATGACTTTTGTGCTGCCAATAACGGCAAAGATATGCTGATCATGCTGCACCAAATGGGCAATCACGGGCCTGCGTATTTT  
AAGCGATATGATGAAAAGTTTGCCAAATTCACGCCAGTGTGTGAAGGTAATGAGCTTGCCAAGTGCGAACATCAGTCCTT  
GATCAATGCTTATGACAATGCCTTGCTTGCCACCGATGATTTTCATCGCTCAAAGTATCCAGTGGCTGCAGACGCACAGCA  
ATGCCTATGATGTCTCAATGCTGTATGTCAGCGATCATGGCGAAAGTCTGGGTGAGAACGGTGTCTATCTACATGGTATG  
CCAAATGCCTTTGCACCAAAAGAACAGCGCAGTGTGCCTGCATTTTTCTGGACGGATAAGCAAACCTGGCATCACGCCAAT  
GGCAACCGATACCGTCCTGACCCATGACGCGATCACGCCGACATTATTAAAGCTGTTTGATGTCACCGCGGACAAAGTCA  
AAGACCGCACCGCATTCATCCGCTGA

>MN879256.1 Escherichia coli strain SAUVM\_E2 phosphoethanolamine--lipid A transferase MCR-1.1 (mcr-1) gene, mcr-1.1 allele,  
partial cds

ATGATGCAGCATACTTCTGTGTGGTACCGACGCTCGGTCAGTCCGTTTGTTCTTGTGGCGAGTGTTGCCGTTTTCTTGAC  
CGCGACCGCCAATCTTACCTTTTTTGATAAAATCAGCCAAACCTATCCCATCGCGGACAATCTCGGCTTTGTGCTGACGA  
TCGCTGTCGTGCTCTTTGGCGCGATGCTACTGATCACCACGCTGTTATCATCGTATCGCTATGTGCTAAAGCCTGTGTTG  
ATTTTGCTATTAATCATGGGCGCGGTGACCAGTTATTTTACTGACACTTATGGCACGGTCTATGATACGACCATGCTCCA  
AAATGCCCTACAGACCGACCAAGCCGAGACCAAGGATCTATTAAACGCAGCGTTTATCATGCGTATCATTGGTTTGGGTG  
TGCTACCAAGTTTGCTTGTGGCTTTTGTTAAGGTGGATTATCCGACTTGGGGCAAGGGTTTGATGCGCCGATTGGGCTTG  
ATCGTGGCAAGTCTTGCGCTGATTTTACTGCCTGTGGTGGCGTTCAGCAGTCATTATGCCAGTTTCTTTCGCGTGCATAA  
GCCGCTGCGTAGCTATGTCAATCCGATCATGCCAATCTACTCGGTGGGTAAAGCTTGCCAGTATTGAGTATAAAAAAGCCA  
GTGCGCCAAAAGATACCATTTATCACGCCAAAGACGCGGTACAAGCAACCAAGCCTGATATGCGTAAGCCACGCCTAGTG  
GTGTTTCGTGTCGGTGAGACGGCACGCGCCGATCATGTCAGCTTCAATGGCTATGAGCGCGATACTTTCCACAGCTTGC

CAAGATCGATGGCGTGACCAATTTTAGCAATGTCACATCGTGCGGCACATCGACGGCGTATTCTGTGCCGTGTATGTTCA  
GCTATCTGGGCGCGGATGAGTATGATGTCGATACCGCCAAATACCAAGAAAATGTGCTGGATACGCTGGATCGCTTGGGC  
GTAAGTATCTTGTGGCGTGATAATAATTCGGACTCAAAAGGCGTGATGGATAAGCTGCCAAAAGCGCAATTTGCCGATTA  
TAAATCCGCGACCAACAACGCCATCTGCAACACCAATCCTTATAACGAATGCCGCGATGTCGGTATGCTCGTTGGCTTAG  
ATGACTTTGTGCTGCCAATAACGGCAAAGATATGCTGATCATGCTGCACCAAATGGGCAATCACGGGCCTGCGTATTTT  
AAGCGATATGATGAAAAGTTTGCCAAATTCACGCCAGTGTGTGAAGGTAATGAGCTTGCCAAGTGCGAACATCAGTCCTT  
GATCAATGCTTATGACAATGCCTTGCTTGCCACCGATGATTTTCATCGCTCAAAGTATCCAGTGGCTGCAGACGCACAGCA  
ATGCCTATGATGTCTCAATGCTGTATGTCAGCGATCATGGCGAAAGTCTGGGTGAGAACGGTGTCTATCTACATGGTATG  
CCAAATGCCTTTGCACCAAAAGAACAGCGCAGTGTGCCTGCATTTTTCTGGACGGATAAGCAAACCTGGCATCACGCCAAT  
GGCAACCGATACCGTCCTGACCCATGACGCGATCACGCCGACATTATTAAAGCTGTTTGATGTCACCGCGGACAAAGTCA  
AAGACCGCACCGCATTCATCCGCTGA

>MN879255.1 Escherichia coli strain SAUVM\_E1 MCR-1 family phosphoethanolamine--lipid A transferase (mcr-1) gene, partial cds

ATGATGCAGCATACTTCTGTGTGGTACCGACGCTCGGTCAGTCCGTTTGTTCCTTGTGGCGAGTGTTGCCGTTTTCTTGAC  
CGCGACCGCCAATCTTACCTTTTTTGATAAAATCAGCCAAACCTATCCCATCGCGGACAATCTCGGCTTTGTGCTGACGA  
TCGCTGTCGTGCTCTTTGGCGCGATGCTACTGATCACCACGCTGTTATCATCGTATCGCTATGTGCTAAAGCCTGTGTTG  
ATTTTGCTATTAATCATGGGCGCGGTGACCAGTTATTTTACTGACACTTATGGCACGGTCTATGATACGACCATGCTCCA  
AAATGCCCTACAGACCGACCAAGCCGAGACCAAGGATCTATTAAACGCAGCGTTTATCATGCGTATCATTGGTTTGGGTG  
TGCTACCAAGTTTGCTTGTGGCTTTTGTTAANGTGGATTATCCGACTTGGGGCAAGGGTTTGATGCGCCGATTGGGCTTG  
ATCGTGGCAAGTCTTGCGCTGATTTTACTGCCTGTGGTGGCGTTCAGCAGTCATTATGCCAGTTTCTTTTCGCGTGCATAA

GCCGCTGCGTAGCTATGTCAATCCGATCATGCCAATCTACTCGGTGGGTAAGCTTGCCAGTATTGAGTATAAAAAAGCCA  
GTGCGCCAAAAGATACCATTTATCACGCCAAAGACGCGGTACAAGCAACCAAGCCTGATATGCGTAAGCCACGCCTAGTG  
GTGTTTCGTCGTCGGTGAGACGGCACGCGCCGATCATGTCAGCTTCAATGGCTATGAGCGCGATACTTTCCCACAGCTTGC  
CAAGATCGATGGCGTGACCAATTTTAGCAATGTCACATCGTGCGGCACATCGACGGCGTATTCTGTGCCGTGTATGTTCA  
GCTATCTGGGCGCGGATGAGTATGATGTGCGATACCGCCAAATACCAAGAAAATGTGCTGGATACGCTGGATCGCTTGGGC  
GTAAGTATCTTGTGGCGTGATAATAATTCGGACTCAAAAGGCGTGATGGATAAGCTGCCAAAAGCGCAATTTGCCGATTA  
TAAATCCGCGACCAACAACGCCATCTGCAACACCAATCCTTATAACGAATGCCGCGATGTCGGTATGCTCGTTGGCTTAG  
ATGACTTTGTGCGCTGCCAATAACGGCAAAGATATGCTGATCATGCTGCACCAAATGGGCAATCACGGGCCTGCGTATTTT  
AAGCGATATGATGAAAAGTTTGCCAAATTCACGCCAGTGTGTGAAGGTAATGAGCTTGCCAAGTGCGAACATCAGTCCTT  
GATCAATGCTTATGACAATGCCTTGCTTGCCACCGATGATTTTCATCGCTCAAAGTATCCAGTGGCTGCAGACGCACAGCA  
ATGCCTATGATGTCTCAATGCTGTATGTCAGCGATCATGGCGAAAGTCTGGGTGAGAACGGTGTCTATCTACATGGTATG  
CCAAATGCCTTTGCACCAAAAGAACAGCGCAGTGTGCCTGCATTTTTCTGGACGGATAAGCAAACCTGGCATCACGCCAAT  
GGCAACCGATACCGTCCTGACCCATGACGCGATCACGCCGACATTATTAAAGCTGTTTGATGTCACCGCGGACAAAGTCA  
AAGACCGCACCGCATTTCATCCGCTGA

>MN367316.1 Escherichia coli strain AF19 phosphoethanolamine--lipid A transferase MCR-1.1 (mcr-1) gene, mcr-1.1 allele, complete cds

ATGATGCAGCATACTTCTGTGTGGTACCGACGCTCGGTTCAGTCCGTTTGTTCCTGTGGCGAGTGTTGCCGTTTTCTTGAC  
CGCGACCGCCAATCTTACCTTTTTTGATAAAATCAGCCAAACCTATCCCATCGCGGACAATCTCGGCTTTGTGCTGACGA  
TCGCTGTCGTGCTCTTTGGCGCGATGCTACTGATCACCACGCTGTTATCATCGTATCGCTATGTGCTAAAGCCTGTGTTG  
ATTTTGCTATTAATCATGGGCGCGGTGACCAGTTATTTTACTGACACTTATGGCACGGTCTATGATACGACCATGCTCCA

AAATGCCCTACAGACCGACCAAGCCGAGACCAAGGATCTATTAAACGCAGCGTTTATCATGCGTATCATTGGTTTGGGTG  
TGCTACCAAGTTTGCTTGTGGCTTTTGTAAAGGTGGATTATCCGACTTGGGGCAAGGGTTTGATGCGCCGATTGGGCTTG  
ATCGTGGCAAGTCTTGCGCTGATTTTACTGCCTGTGGTGGCGTTCAGCAGTCATTATGCCAGTTTCTTTCGCGTGCATAA  
GCCGCTGCGTAGCTATGTCAATCCGATCATGCCAATCTACTCGGTGGGTAAAGCTTGCCAGTATTGAGTATAAAAAAGCCA  
GTGCGCCAAAAGATAACCATTTATCACGCCAAAGACGCGGTACAAGCAACCAAGCCTGATATGCGTAAGCCACGCCTAGTG  
GTGTTTCGTCGTCGGTGAGACGGCACGCGCCGATCATGTCAGCTTCAATGGCTATGAGCGCGATACTTTCCACAGCTTGC  
CAAGATCGATGGCGTGACCAATTTTAGCAATGTCACATCGTGCGGCACATCGACGGCGTATTCTGTGCCGTGTATGTTCA  
GCTATCTGGGCGCGGATGAGTATGATGTCGATACCGCCAAATACCAAGAAAATGTGCTGGATACGCTGGATCGCTTGGGC  
GTAAGTATCTTGTGGCGTGATAATAATTCGGA CTCAAAGGCGTGATGGATAAGCTGCCAAAAGCGCAATTTGCCGATTA  
TAAATCCGCGACCAACAACGCCATCTGCAACACCAATCCTTATAACGAATGCCGCGATGTCGGTATGCTCGTTGGCTTAG  
ATGACTTTGTGCTGCCAATAACGGCAAAGATATGCTGATCATGCTGCACCAAATGGGCAATCACGGGCCTGCGTATTTT  
AAGCGATATGATGAAAAGTTTGCCAAATTCACGCCAGTGTGTGAAGGTAATGAGCTTGCCAAGTGCGAACATCAGTCCTT  
GATCAATGCTTATGACAATGCCTTGCTTGCCACCGATGATTTTCATCGCTCAAAGTATCCAGTGGCTGCAGACGCACAGCA  
ATGCCTATGATGTCTCAATGCTGTATGTCAGCGATCATGGCGAAAGTCTGGGTGAGAACGGTGTCTATCTACATGGTATG  
CCAAATGCCTTTGCACCAAAAGAACAGCGCAGTGTGCCTGCATTTTTCTGGACGGATAAGCAA ACTGGCATCACGCCAAT  
GGCAACCGATACCGTCCTGACCCATGACGCGATCACGCCGACATTATTAAAGCTGTTTGATGTCACCGCGGACAAAGTCA  
AAGACCGCACCGCATTTCATCCGCTGA

>MN367315.1 Escherichia coli strain AF17 phosphoethanolamine--lipid A transferase MCR-1.1 (mcr-1) gene, mcr-1.1 allele, complete cds

ATGATGCAGCATACTTCTGTGTGGTACCGACGCTCGGT CAGTCCGTTTGTCTTGTGGCGAGTGTTGCCGTTTTCTTGAC

CGCGACCGCCAATCTTACCTTTTTTGATAAAATCAGCCAAACCTATCCCATCGCGGACAATCTCGGCTTTGTGCTGACGA  
TCGCTGTCGTGCTCTTTGGCGCGATGCTACTGATCACCACGCTGTTATCATCGTATCGCTATGTGCTAAAGCCTGTGTTG  
ATTTTGCTATTAATCATGGGCGCGGTGACCAGTTATTTTACTGACACTTATGGCACGGTCTATGATACGACCATGCTCCA  
AAATGCCCTACAGACCGACCAAGCCGAGACCAAGGATCTATTAACGCAGCGTTTATCATGCGTATCATTGGTTTGGGTG  
TGCTACCAAGTTTGCTTGTGGCTTTTGTTAAGGTGGATTATCCGACTTGGGGCAAGGGTTTGATGCGCCGATTGGGCTTG  
ATCGTGGCAAGTCTTGCGCTGATTTTACTGCCTGTGGTGGCGTTCAGCAGTCATTATGCCAGTTTCTTTCGCGTGCATAA  
GCCGCTGCGTAGCTATGTCAATCCGATCATGCCAATCTACTCGGTGGGTAAAGCTTGCCAGTATTGAGTATAAAAAAGCCA  
GTGCGCCAAAAGATACCATTTATCACGCCAAAGACGCGGTACAAGCAACCAAGCCTGATATGCGTAAGCCACGCCTAGTG  
GTGTTTCGTCGTCGGTGAGACGGCACGCGCCGATCATGTCAGCTTCAATGGCTATGAGCGCGATACTTTCCACAGCTTGC  
CAAGATCGATGGCGTGACCAATTTTAGCAATGTCACATCGTGCGGCACATCGACGGCGTATTCTGTGCCGTGTATGTTCA  
GCTATCTGGGCGCGGATGAGTATGATGTCGATACCGCCAAATACCAAGAAAATGTGCTGGATACGCTGGATCGCTTGGGC  
GTAAGTATCTTGTGGCGTGATAATAATTCGGACTCAAAGGCGTGATGGATAAGCTGCCAAAAGCGCAATTTGCCGATTA  
TAAATCCGCGACCAACAACGCCATCTGCAACACCAATCCTTATAACGAATGCCGCGATGTCGGTATGCTCGTTGGCTTAG  
ATGACTTTGTCGCTGCCAATAACGGCAAAGATATGCTGATCATGCTGCACCAAATGGGCAATCACGGGCCTGCGTATTTT  
AAGCGATATGATGAAAAGTTTGCCAAATTCACGCCAGTGTGTGAAGGTAATGAGCTTGCCAAGTGCGAACATCAGTCCTT  
GATCAATGCTTATGACAATGCCTTGCTTGCCACCGATGATTTTCATCGCTCAAAGTATCCAGTGGCTGCAGACGCACAGCA  
ATGCCTATGATGTCTCAATGCTGTATGTCAGCGATCATGGCGAAAGTCTGGGTGAGAACGGTGTCTATCTACATGGTATG  
CCAAATGCCTTTGCACCAAAAGAACAGCGCAGTGTGCCTGCATTTTTCTGGACGGATAAGCAAACCTGGCATCACGCCAAT  
GGCAACCGATACCGTCCTGACCCATGACGCGATCACGCCGACATTATTAAAGCTGTTTGATGTCACCGCGGACAAAGTCA

AAGACCGCACCGCATTTCATCCGCTGA

>MN367313.1 Escherichia coli strain AF15 phosphoethanolamine--lipid A transferase MCR-1.1 (mcr-1) gene, mcr-1.1 allele, complete cds

ATGATGCAGCATACTTCTGTGTGGTACCGACGCTCGGTCACTCCGTTTGTTCCTGTGGCGAGTGTTGCCGTTTTCTTGAC  
CGCGACCGCCAATCTTACCTTTTTTGATAAAATCAGCCAAACCTATCCCATCGCGGACAATCTCGGCTTTGTGCTGACGA  
TCGCTGTCGTGCTCTTTGGCGCGATGCTACTGATCACCACGCTGTTATCATCGTATCGCTATGTGCTAAAGCCTGTGTTG  
ATTTTGCTATTAATCATGGGCGCGGTGACCAGTTATTTTACTGACACTTATGGCACGGTCTATGATACGACCATGCTCCA  
AAATGCCCTACAGACCGACCAAGCCGAGACCAAGGATCTATTAAACGCAGCGTTTATCATGCGTATCATTGGTTTGGGTG  
TGCTACCAAGTTTGCTTGTGGCTTTTGTTAAGGTGGATTATCCGACTTGGGGCAAGGGTTTGATGCGCCGATTGGGCTTG  
ATCGTGGCAAGTCTTGCGCTGATTTTACTGCCTGTGGTGGCGTTCAGCAGTCATTATGCCAGTTTCTTTCGCGTGCATAA  
GCCGCTGCGTAGCTATGTCAATCCGATCATGCCAATCTACTCGGTGGGTAAAGCTTGCCAGTATTGAGTATAAAAAAGCCA  
GTGCGCCAAAAGATACCATTTATCACGCCAAAGACGCGGTACAAGCAACCAAGCCTGATATGCGTAAGCCACGCCTAGTG  
GTGTTTCGTCGTCGGTGAGACGGCACGCGCCGATCATGTCAGCTTCAATGGCTATGAGCGCGATACTTTCCACAGCTTGC  
CAAGATCGATGGCGTGACCAATTTTAGCAATGTCACATCGTGCGGCACATCGACGGCGTATTCTGTGCCGTGTATGTTCA  
GCTATCTGGGCGCGGATGAGTATGATGTCGATACCGCCAAATACCAAGAAAATGTGCTGGATACGCTGGATCGCTTGGGC  
GTAAGTATCTTGTGGCGTGATAATAATTCGGACTCAAAAGGCGTGATGGATAAGCTGCCAAAAGCGCAATTTGCCGATTA  
TAAATCCGCGACCAACAACGCCATCTGCAACACCAATCCTTATAACGAATGCCGCGATGTCGGTATGCTCGTTGGCTTAG  
ATGACTTTGTGCTGCCAATAACGGCAAAGATATGCTGATCATGCTGCACCAAATGGGCAATCACGGGCCTGCGTATTTT  
AAGCGATATGATGAAAAGTTTGCCAAATTCACGCCAGTGTGTGAAGGTAATGAGCTTGCCAAGTGCGAACATCAGTCCTT  
GATCAATGCTTATGACAATGCCTTGCTTGCCACCGATGATTTTCATCGCTCAAAGTATCCAGTGGCTGCAGACGCACAGCA

ATGCCTATGATGTCTCAATGCTGTATGTCAGCGATCATGGCGAAAGTCTGGGTGAGAACGGTGTCTATCTACATGGTATG  
CCAAATGCCTTTGCACCAAAAGAACAGCGCAGTGTGCCTGCATTTTTCTGGACGGATAAGCAAACCTGGCATCACGCCAAT  
GGCAACCGATAACCGTCCTGACCCATGACGCGATCACGCCGACATTATTAAAGCTGTTTGATGTCACCGCGGACAAAGTCA  
AAGACCGCACCGCATTTCATCCGCTGA

>MH484519.1 Escherichia coli strain P0001 plasmid pP0001 insertion sequence ISAp11 transposase (tnpA) gene, complete cds; and  
phosphoethanolamine--lipid A transferase MCR-1.1 (mcr-1) and hypothetical protein genes, complete cds

CTTAATCACGGATTCACTCGTGAAATGGCAGAAGATGCTCTTGGAACAAATTTGTCCAGGCCAGAGAAGAACATCTGGA  
ATTGCAGCAACAGCGTGACAATTCACAGGACATGCACTAATTAAGAAAAAAGCCCGGTTTTCGGGCTTTTAAGAGCTGA  
ATTTACAATCCAAGTGCAACAAAAAAGAAGTACTCATCACTAGAATATAATTTTGTTCACACAAAAACCAATTCCA  
AATGATGAGTACTTCCTACCGACATCTTACAATAAACGAGCGAGAAAAGATAATGATTTTACTCGCACAGGGCAAAAAAC  
AAGCAGAAATTGCCAAAGCACTGGGACGTAGCTCCAGCACCATTTCTCGCGAGCTGAAACGACACGCTCTAGAAAGCTAC  
AGTGCAACGAACGCACAAAACAGCTATTTGAAGCATCGTCAAAATAGCAAAGCACAGCGCAAATTAGAGCAGCCTGAATA  
TTTCAATTTGGTGCAAGAAAAGTTTCTGACAGAAAACCTGGTCGCCCCGAACAAATCAGCGCACGATTAAAATTGGAAAAAT  
CTGAATTATCCATTAGTTATTCAACCATTTATCGTGGTATTTATTCAGGGTTGTTTGATATAGGCGAACGCAAAGCCAGT  
CGCAAACCTGCGCCACAAAGGCAAAACACGGCATAAAAAAATCATCATGAAAAACGTGGCAAATTCAGATATCCAACC  
A  
TTTGAACGACCGTCCCATTTTCGGCGCAAAATCGCAGTCGCTTTGGACATTGGGAAGCCGATACCGTACTGGGTAAAGCGG  
GTGGAGCTTGTTTGCTGACGCTGACGGAACGCAAAAGTCGTTTTGAGTTGGTGAAGAAAATTCCTGCCAAAAAAGCCGAA  
GCAGTCCAAAAAGCCATGATTGAATTGCTGGATTACATATATTGCGGTCAATTACGCCAGACCGTGGTAAAGAATTTGC  
CCAACATCGTTTGGTAACAGAAGCACTGGGTGTAGAATTTTACTTCCCCGAGCCGCATCAACCGTGGACACGGGGAACGA



ATGAAAATACAAATGGGTACTTCGTGAATACTTTCCGAAGCACCAAGACATCAATCAGTGGAGCGAAGTTGATATTCAA  
CAGGTGATCAATAAACTGAATTTACGACCACGTAAATGTTTAGGTTGGAAAACACCTTATGAAGTTTACTTCAAAAAATC  
GTTGCACTTGGTTTGACAATTCAAGATACAAATTATAAATACTCTCAAGTGTATATTCAGTATGGGATTGCGCAATGATT  
GCCTAATAAAATTTCTGAAATATTTCTGTATCGCATAATTTTTTATATCAGATAAATTGTACTGGATTTCTTAAAAAATT  
GCAGTATAATTGCCGCAATTATCCCACCGTTTATTTTTTGAGTAGTTTCTCATGATGCAGCATACTTCTGTGTGGTACCG  
ACGCTCGGTCAGTCCGTTTGTTCTTGTTGGCGAGTGTTGCCGTTTTCTTGACCGCGACCGCCAATCTTACCTTTTTTGATA  
AAATCAGCCAAACCTATCCCATCGCGGACAATCTCGGCTTTGTGCTGACGATCGCTGTCGTGCTCTTTGGCGCGATGCTA  
CTGATCACCACGCTGTTATCATCGTATCGCTATGTGCTAAAGCCTGTGTTGATTTTGCTATTAATCATGGGCGCGGTGAC  
CAGTTATTTTACTGACACTTATGGCACGGTCTATGATACGACCATGCTCCAAAATGCCCTACAGACCGACCAAGCCGAGA  
CCAAGGATCTATTAAACGCAGCGTTTATCATGCGTATCATTGGTTTGGGTGTGCTACCAAGTTTGCTTGTGGCTTTTGTT  
AAGGTGGATTATCCGACTTGGGGCAAGGGTTTGATGCGCCGATTGGGCTTGATCGTGGCAAGTCTTGCGCTGATTTTACT  
GCCTGTGGTGGCGTTCAGCAGTCATTATGCCAGTTTCTTTCGCGTGCATAAGCCGCTGCGTAGCTATGTCAATCCGATCA  
TGCCAATCTACTCGGTGGGTAAGCTTGCCAGTATTGAGTATAAAAAAGCCAGTGCGCCAAAAGATACCATTTATCACGCC  
AAAGACGCGGTACAAGCAACCAAGCCTGATATGCGTAAGCCACGCCTAGTGGTGTTTCGTCGTCGGTGAGACGGCACGCGC  
CGATCATGTCAGCTTCAATGGCTATGAGCGCGATACTTTCCCACAGCTTGCCAAGATCGATGGCGTGACCAATTTTAGCA  
ATGTCACATCGTGCGGCACATCGACGGCGTATTCTGTGCCGTGTATGTTTCACTATCTGGGCGCGGATGAGTATGATGTC  
GATACCGCCAAATACCAAGAAAATGTGCTGGATACGCTGGATCGCTTGGGCGTAAGTATCTTGTGGCGTGATAATAATTC  
GGACTCAAAGGCGTGATGGATAAGCTGCCAAAAGCGCAATTTGCCGATTATAAATCCGCGACCAACAACGCCATCTGCA  
ACACCAATCCTTATAACGAATGCCGCGATGTCGGTATGCTCGTTGGCTTAGATGACTTTGTCGCTGCCAATAACGGCAAA

GATATGCTGATCATGCTGCACCAAATGGGCAATCACGGGCCTGCGTATTTTAAGCGATATGATGAAAAGTTTGCCAAATT  
CACGCCAGTGTGTGAAGGTAATGAGCTTGCCAAGTGCGAACATCAGTCCTTGATCAATGCTTATGACAATGCCTTGCTTG  
CCACCGATGATTTTCATCGCTCAAAGTATCCAGTGGCTGCAGACGCACAGCAATGCCTATGATGTCTCAATGCTGTATGTC  
AGCGATCATGGCGAAAGTCTGGGTGAGAACGGTGTCTATCTACATGGTATGCCAAATGCCTTTGCACCAAAGAAGACAGCG  
CAGTGTGCCTGCATTTTTCTGGACGGATAAGCAAACCTGGCATCACGCCAATGGCAACCGATACCGTCCTGACCCATGACG  
CGATCACGCCGACATTATTAAGCTGTTTGATGTCACCGCGGACAAAGTCAAAGACCGCACCGCATTTCATCCGCTGATTT  
CTCCCTGTATTTTTTCCAAACCCACCGCACACTCCATTTCGTATTATGGGCGGTGGGGTGGGGTTTGTTATGCCGTATTTA  
TCAAATAAACGCCTACTTGCTGAGATGAGTATCGCTCTTGTCATGGCGATCGTTGCCACGCTGACCCTTGAGCACAGTCA  
GATTGATCTGATGGTCGCTGATTGGTTTTATCTGGGTATGGGGCATTGGATGGTTGCCAAGCAAGCTTTTTTGCCAGATT  
TGCTACTGTATTCTGGACTAAAAAAGCTGCTGATGGCGATGCTGATCTACTTGCTGGTTGCGACCATTGCGCGTGCTTAT  
CATGAGAAAAAGGGCAATGCTATCACTGCCAAGTGGCTTGTCAGTGACAAAATTCGCGTGCGTGAGCTTGCGTATCT  
GGTGCTGACTTTGATCCTAGTGCCGACAGTTGTCGCGTCATTGAAGGCATATACTCATGTGGTCTGCCCTGTGCATTTGA  
CGATTTTTGATGGTACGCTGCCGTATTTGCCGATGCTTGATAGTATGCGTAACACCATTCTGATAAGTGCTTTCCTGCG  
GCGCATGCCAGTAGCGGATTTGCGCTGTTTGCCTTTGCGTTTGCGCCAAGTTTGCGCCGCGTCGTGGTGCGATCATCAT  
CGTGGTGATGGCATTGGGCTGGGCGATGGGCTGCTATAAGATGATTATTGGCGATCATTTTTTGAGCCATACGGTGGTGT  
CGATGATGCTTGCGTGGGCGATGTCGGCAGGGCTTGCGTGGGTGTTTTTAAGAAGGGTGAACAAGTTCAAGGAAAAAAA  
ATCAACCCCAAACAGAAATAACAGCTACAAAAATGGACAGTAATAATGCAATAAAAGTAATGTTGAGCCATATGTTGGAC  
GAGA

>MK405590.1 Escherichia coli strain CR4 plasmid phosphoethanolamine--lipid A transferase MCR-1.1 (mcr-1) gene, mcr-1.1 allele, complete cds

ATGATGCAGCATACTTCTGTGTGGTACCGACGCTCGGTGAGTCCGTTTGTTCCTGTGGCGAGTGTTGCCGTTTTCTTGAC  
CGCGACCGCCAATCTTACCTTTTTTGATAAAATCAGCCAAACCTATCCCATCGCGGACAATCTCGGCTTTGTGCTGACGA  
TCGCTGTCGTGCTCTTTGGCGCGATGCTACTGATCACCACGCTGTTATCATCGTATCGCTATGTGCTAAAGCCTGTGTTG  
ATTTTGCTATTAATCATGGGCGCGGTGACCAGTTATTTTACTGACACTTATGGCACGGTCTATGATACGACCATGCTCCA  
AAATGCCCTACAGACCGACCAAGCCGAGACCAAGGATCTATTAACGCAGCGTTTATCATGCGTATCATTGGTTTGGGTG  
TGCTACCAAGTTTGCTTGTGGCTTTTGTTAAGGTGGATTATCCGACTTGGGGCAAGGGTTTGATGCGCCGATTGGGCTTG  
ATCGTGGCAAGTCTTGCGCTGATTTTACTGCCTGTGGTGGCGTTCAGCAGTCATTATGCCAGTTTCTTTCGCGTGCATAA  
GCCGCTGCGTAGCTATGTCAATCCGATCATGCCAATCTACTCGGTGGGTAAAGCTTGCCAGTATTGAGTATAAAAAAGCCA  
GTGCGCCAAAAGATACCATTTATCACGCCAAAGACGCGGTACAAGCAACCAAGCCTGATATGCGTAAGCCACGCCTAGTG  
GTGTTTCGTCGTCGGTGAGACGGCACGCGCCGATCATGTCAGCTTCAATGGCTATGAGCGCGATACTTTCCACAGCTTGC  
CAAGATCGATGGCGTGACCAATTTTAGCAATGTCACATCGTGCGGCACATCGACGGCGTATTCTGTGCCGTGTATGTTCA  
GCTATCTGGGCGCGGATGAGTATGATGTCGATACCGCCAAATACCAAGAAAATGTGCTGGATACGCTGGATCGCTTGGGC  
GTAAGTATCTTGTGGCGTGATAATAATTCGGACTCAAAGGCGTGATGGATAAGCTGCCAAAAGCGCAATTTGCCGATTA  
TAAATCCGCGACCAACAACGCCATCTGCAACACCAATCCTTATAACGAATGCCGCGATGTCGGTATGCTCGTTGGCTTAG  
ATGACTTTGTGCTGCCAATAACGGCAAAGATATGCTGATCATGCTGCACCAAATGGGCAATCACGGGCCTGCGTATTTT  
AAGCGATATGATGAAAAGTTTGCCAAATTCACGCCAGTGTGTGAAGGTAATGAGCTTGCCAAGTGCGAACATCAGTCCTT  
GATCAATGCTTATGACAATGCCTTGCTTGCCACCGATGATTTTCATCGCTCAAAGTATCCAGTGGCTGCAGACGCACAGCA  
ATGCCTATGATGTCTCAATGCTGTATGTCAGCGATCATGGCGAAAGTCTGGGTGAGAACGGTGTCTATCTACATGGTATG  
CCAAATGCCTTTGCACCAAAAGAACAGCGCAGTGTGCCTGCATTTTTCTGGACGGATAAGCAAACCTGGCATCACGCCAAT

GGCAACCGATACCGTCCTGACCCATGACGCGATCACGCCGACATTATTAAAGCTGTTTGATGTCACCGCGGACAAAGTCA  
AAGACCGCACCGCATTTCATCCGCTGA

>LC427672.1 Escherichia coli plasmid pIVRIKOL-2 mcr-1 gene for phosphoethanolamine transferase MCR1, complete cds

ATGATGCAGCATACTTCTGTGTGGTACCGACGCTCGGTCAGTCCGTTTGTTCTTGTGGCGAGTGTTGCCGTTTTCTTGAC  
CGCGACCGCCAATCTTACCTTTTTTGATAAAATCAGCCAAACCTATCCCATCGCGGACAATCTCGGCTTTGTGCTGACGA  
TCGCTGTCGTGCTCTTTGGCGCGATGCTACTGATCACCACGCTGTTATCATCGTATCGCTATGTGCTAAAGCCTGTGTTG  
ATTTTGCTATTAATCATGGGCGCGGTGACCAGTTATTTTACTGACACTTATGGCACGGTCTATGATACGACCATGCTCCA  
AAATGCCCTACAGACCGACCAAGCCGAGACCAAGGATCTATTAAACGCAGCGTTTATCATGCGTATCATTGGTTTGGGTG  
TGCTACCAAGTTTGCTTGTGGCTTTTGTTAAGGTGGATTATCCGACTTGGGGCAAGGGTTTGATGCGCCGATTGGGCTTG  
ATCGTGGCAAGTCTTGCGCTGATTTTACTGCCTGTGGTGGCGTTCAGCAGTCATTATGCCAGTTTCTTTCGCGTGCATAA  
GCCGCTGCGTAGCTATGTCAATCCGATCATGCCAATCTACTCGGTGGGTAAGCTTGCCAGTATTGAGTATAAAAAAGCCA  
GTGCGCCAAAAGATACCATTTATCACGCCAAAGACGCGGTACAAGCAACCAAGCCTGATATGCGTAAGCCACGCCTAGTG  
GTGTTGTCGTCGTCGGTGAGACGGCACGCGCCGATCATGTCAGCTTCAATGGCTATGAGCGCGATACTTTCCACAGCTTGC  
CAAGATCGATGGCGTGACCAATTTTAGCAATGTCACATCGTGCGGCACATCGACGGCGTATTCTGTGCCGTGTATGTTCA  
GCTATCTGGGCGCGGATGAGTATGATGTCGATACCGCCAAATACCAAGAAAATGTGCTGGATACGCTGGATCGCTTGGGC  
GTAAGTATCTTGTGGCGTGATAATAATTCGGACTCAAAGGCGTGATGGATAAGCTGCCAAAAGCGCAATTTGCCGATTA  
TAAATCCGCGACCAACAACGCCATCTGCAACACCAATCCTTATAACGAATGCCGCGATGTCGGTATGCTCGTTGGCTTAG  
ATGACTTTGTGCTGCCAATAACGGCAAAGATATGCTGATCATGCTGCACCAAATGGGCAATCACGGGCCTGCGTATTTT  
AAGCGATATGATGAAAAGTTTGCCAAATTCACGCCAGTGTGTGAAGGTAATGAGCTTGCCAAGTGCGAACATCAGTCCTT

GATCAATGCTTATGACAATGCCTTGCTTGCCACCGATGATTTTCATCGCTCAAAGTATCCAGTGGCTGCAGACGCACAGCA  
ATGCCTATGATGTCTCAATGCTGTATGTCAGCGATCATGGCGAAAGTCTGGGTGAGAACGGTGTCTATCTACATGGTATG  
CCAAATGCCTTTGCACCAAAAGAACAGCGCAGTGTGCCTGCATTTTTCTGGACGGATAAGCAAACCTGGCATCACGCCAAT  
GGCAACCGATACCGTCCTGACCCATGACGCGATCACGCCGACATTATTAAAGCTGTTTGATGTCACCGCGGACAAAGTCA  
AAGACCGCACCGCATTTCATCCGCTGA

>MH602243.1 Escherichia coli strain TA007 isolate R54 plasmid phosphoethanolamine transferase MCR-1 (mcr-1) gene, complete cds

ATGATGCAGCATACTTCTGTGTGGTACCGACGCTCGGTTCAGTCCGTTTGTTCTTGTGGCGAGTGTTGCCGTTTTCTTGAC  
CGCGACCGCCAATCTTACCTTTTTTGATAAAATCAGCCAAACCTATCCCATCGCGGACAATCTCGGCTTTGTGCTGACGA  
TCGCTGTCGTGCTCTTTGGCGCGATGCTACTGATCACCACGCTGTTATCATCGTATCGCTATGTGCTAAAGCCTGTGTTG  
ATTTTGCTATTAATCATGGGCGCGGTGACCAGTTATTTTACTGACACTTATGGCACGGTCTATGATACGACCATGCTCCA  
AAATGCCCTACAGACCGACCAAGCCGAGACCAAGGATCTATTAAACGCAGCGTTTATCATGCGTATCATTGGTTTGGGTG  
TGCTACCAAGTTTGCTTGTGGCTTTTGTTAAGGTGGATTATCCGACTTGGGGCAAGGGTTTGATGCGCCGATTGGGCTTG  
ATCGTGGCAAGTCTTGCGCTGATTTTACTGCCTGTGGTGGCGTTCAGCAGTCATTATGCCAGTTTCTTTTCGCGTGCATAA  
GCCGCTGCGTAGCTATGTCAATCCGATCATGCCAATCTACTCGGTGGGTAAAGCTTGCCAGTATTGAGTATAAAAAAGCCA  
GTGCGCCAAAAGATACCATTATCACGCCAAAGACGCGGTACAAGCAACCAAGCCTGATATGCGTAAGCCACGCCTAGTG  
GTGTTTCGTCGTGGTGAGACGGCACGCGCCGATCATGTCAGCTTCAATGGCTATGAGCGCGATACTTTCCACAGCTTGC  
CAAGATCGATGGCGTGACCAATTTTAGCAATGTCACATCGTGCGGCACATCGACGGCGTATTCTGTGCCGTGTATGTTCA  
GCTATCTGGGCGCGGATGAGTATGATGTCGATACCGCCAAATACCAAGAAAATGTGCTGGATACGCTGGATCGCTTGGGC  
GTAAGTATCTTGTGGCGTGATAATAATTCGGACTCAAAGGCGTGATGGATAAGCTGCCAAAAGCGCAATTTGCCGATTA

TAAATCCGCGACCAACAACGCCATCTGCAACACCAATCCTTATAACGAATGCCGCGATGTCGGTATGCTCGTTGGCTTAG  
ATGACTTTTGTGCTGCCAATAACGGCAAAGATATGCTGATCATGCTGCACCAAATGGGCAATCACGGGCCTGCGTATTTT  
AAGCGATATGATGAAAAGTTTGCCAAATTCACGCCAGTGTGTGAAGGTAATGAGCTTGCCAAGTGCGAACATCAGTCCTT  
GATCAATGCTTATGACAATGCCTTGCTTGCCACCGATGATTTTCATCGCTCAAAGTATCCAGTGGCTGCAGACGCACAGCA  
ATGCCTATGATGTCTCAATGCTGTATGTCAGCGATCATGGCGAAAGTCTGGGTGAGAACGGTGTCTATCTACATGGTATG  
CCAAATGCCTTTGCACCAAAAGAACAGCGCAGTGTGCCTGCATTTTTCTGGACGGATAAGCAAACCTGGCATCACGCCAAT  
GGCAACCGATACCGTCCTGACCCATGACGCGATCACGCCGACATTATTAAAGCTGTTTGATGTCACCGCGGACAAAGTCA  
AAGACCGCACCGCATTCATCCGCTGA

>MH602242.1 Escherichia coli strain TA007 isolate R53 plasmid phosphoethanolamine transferase MCR-1 (mcr-1) gene, complete cds

ATCCCACCGTTTATTTTTTGAGTAGTTTCTCATGATGCAGCATACTTCTGTGTGGTACCGACGCTCGGTCAGTCCGTTTG  
TTCTTGTGGCGAGTGTTGCCGTTTTCTTGACCGCGACCGCCAATCTTACCTTTTTTGATAAAATCAGCCAAACCTATCCC  
ATCGCGGACAATCTCGGCTTTGTGCTGACGATCGCTGTCGTGCTCTTTGGCGCGATGCTACTGATCACCACGCTGTTATC  
ATCGTATCGCTATGTGCTAAAGCCTGTGTTGATTTTGCTATTAATCATGGGCGCGGTGACCAGTTATTTTACTGACACTT  
ATGGCACGGTCTATGATACGACCATGCTCCAAAATGCCCTACAGACCGACCAAGCCGAGACCAAGGATCTATTAAACGCA  
GCGTTTATCATGCGTATCATTGGTTTGGGTGTGCTACCAAGTTTGCTTGTGGCTTTTGTTAAGGTGGATTATCCGACTTG  
GGGCAAGGGTTTGATGCGCCGATTGGGCTTGATCGTGGCAAGTCTTGCGCTGATTTTACTGCCTGTGGTGGCGTTCAGCA  
GTCATTATGCCAGTTTCTTTCGCGTGCATAAGCCGCTGCGTAGCTATGTCAATCCGATCATGCCAATCTACTCGGTGGGT  
AAGCTTGCCAGTATTGAGTATAAAAAAGCCAGTGCGCCAAAAGATACCATTATCACGCCAAAGACGCGGTACAAGCAAC  
CAAGCCTGATATGCGTAAGCCACGCCTAGTGGTGTTCGTGTCGGTGAGACGGCACGCGCCGATCATGTCAGCTTCAATG

GCTATGAGCGCGATACTTTCCACAGCTTGCCAAGATCGATGGCGTGACCAATTTTAGCAATGTCACATCGTGCGGCACA  
TCGACGGCGTATTCTGTGCCGTGTATGTTTCAGCTATCTGGGCGCGGATGAGTATGATGTCGATACCGCCAAATACCAAGA  
AAATGTGCTGGATACGCTGGATCGCTTGGGCGTAAGTATCTTGTGGCGTGATAATAATTCGGACTCAAAGGCGTGATGG  
ATAAGCTGCCAAAAGCGCAATTTGCCGATTATAAATCCGCGACCAACAACGCCATCTGCAACACCAATCCTTATAACGAA  
TGCCGCGATGTCGGTATGCTCGTTGGCTTAGATGACTTTGTCGCTGCCAATAACGGCAAAGATATGCTGATCATGCTGCA  
CCAAATGGGCAATCACGGGCCTGCGTATTTAAGCGATATGATGAAAAGTTTGCCAAATTCACGCCAGTGTGTGAAGGTA  
ATGAGCTTGCCAAGTGCGAACATCAGTCCTTGATCAATGCTTATGACAATGCCTTGCTTGCCACCGATGATTTTCATCGCT  
CAAAGTATCCAGTGGCTGCAGACGCACAGCAATGCCTATGATGTCTCAATGCTGTATGTCAGCGATCATGGCGAAAGTCT  
GGGTGAGAACGGTGTCTATCTACATGGTATGCCAAATGCCTTTGCACCAAAGAAGACAGCGCAGTGTGCCTGCATTTTCT  
GGACGGATAAGCAAACCTGGCATCACGCCAATGGCAACCGATACCGTCCTGACCCATGACGCGATCACGCCGACATTATTA  
AAGCTGTTTGATGTCACCGCGGACAAAGTCAAAGACCGCACCGCATTTCATCCGCTGATTTCTCCCTGTATTTTTTCCAAA  
CCCACCGCACACTCCATTCGTAT

>MH602241.1 Escherichia coli strain TA007 isolate R51 plasmid phosphoethanolamine transferase MCR-1 (mcr-1) gene, complete cds

TCCCACCGTTTATTTTTTGAGTAGTTTCTCATGATGCAGCATACTTCTGTGTGGTACCGACGCTCGGTCAGTCCGTTTGT  
TCTTGTGGCGAGTGTTGCCGTTTTCTTGACCGCGACCGCCAATCTTACCTTTTTTGATAAAATCAGCCAAACCTATCCCA  
TCGCGGACAATCTCGGCTTTGTGCTGACGATCGCTGTCGTGCTCTTTGGCGCGATGCTACTGATCACCACGCTGTTATCA  
TCGTATCGCTATGTGCTAAAGCCTGTGTTGATTTTGCTATTAATCATGGGCGCGGTGACCAGTATTTTACTGACACTTA  
TGGCACGGTCTATGATACGACCATGCTCCAAAATGCCCTACAGACCGACCAAGCCGAGACCAAGGATCTATTAAACGCAG  
CGTTTATCATGCGTATCATTGGTTTGGGTGTGCTACCAAGTTTGCTTGTGGCTTTTGTAAAGGTGGATTATCCGACTTGG

GGCAAGGGTTTGATGCGCCGATTGGGCTTGATCGTGGCAAGTCTTGCGCTGATTTTACTGCCTGTGGTGGCGTTCAGCAG  
TCATTATGCCAGTTTCTTTCGCGTGCATAAGCCGCTGCGTAGCTATGTCAATCCGATCATGCCAATCTACTCGGTGGGTA  
AGCTTGCCAGTATTGAGTATAAAAAAGCCAGTGCGCCAAAAGATACCATTTATCACGCCAAAGACGCGGTACAAGCAACC  
AAGCCTGATATGCGTAAGCCACGCCTAGTGGTGTTCGTTCGTTCGGTGAGACGGCACGCGCCGATCATGTCAGCTTCAATGG  
CTATGAGCGCGATACTTTCCACAGCTTGCCAAGATCGATGGCGTGACCAATTTTAGCAATGTCACATCGTGCGGCACAT  
CGACGGCGTATTCTGTGCCGTGTATGTTTCAGCTATCTGGGCGCGGATGAGTATGATGTCGATACCGCCAAATACCAAGAA  
AATGTGCTGGATACGCTGGATCGCTTGGGCGTAAGTATCTTGTGGCGTGATAATAATTCCGACTCAAAGGCGTGATGGA  
TAAGCTGCCAAAAGCGCAATTTGCCGATTATAAATCCGCGACCAACAACGCCATCTGCAACACCAATCCTTATAACGAAT  
GCCGCGATGTCGGTATGCTCGTTGGCTTAGATGACTTTGTCGCTGCCAATAACGGCAAAGATATGCTGATCATGCTGCAC  
CAAATGGGCAATCACGGGCCTGCGTATTTTAAGCGATATGATGAAAAGTTTGCCAAATTCACGCCAGTGTGTGAAGGTAA  
TGAGCTTGCCAAGTGCGAACATCAGTCCTTGATCAATGCTTATGACAATGCCTTGCTTGCCACCGATGATTTTCATCGCTC  
AAAGTATCCAGTGGCTGCAGACGCACAGCAATGCCTATGATGTCTCAATGCTGTATGTCAGCGATCATGGCGAAAGTCTG  
GGTGAGAACGGTGTCTATCTACATGGTATGCCAAATGCCTTTGCACCAAAGAAGACAGCGCAGTGTGCCTGCATTTTTCTG  
GACGGATAAGCAAACCTGGCATCACGCCAATGGCAACCGATACCGTCCTGACCCATGACGCGATCACGCCGACATTATTAA  
AGCTGTTTGATGTCACCGCGGACAAAGTCAAAGACCGCACCGCATTCATCCGCTGATTTCTCCCTGTATTTTTTCCAAAC  
CCACCGCACACTCCATT

>MH602240.1 Escherichia coli strain TA007 isolate R50 plasmid phosphoethanolamine transferase MCR-1 (mcr-1) gene, complete cds

TATCCCACCGTTTATTTTTTGAGTAGTTTCTCATGATGCAGCATACTTCTGTGTGGTACCGACGCTCGGTTCAGTCCGTTT  
GTTCTTGTGGCGAGTGTGCGGTTTTCTTGACCGCGACCGCCAATCTTACCTTTTTTGATAAAATCAGCCAAACCTATCC



CATCGCGGACAATCTCGGCTTTGTGCTGACGATCGCTGTCGTGCTCTTTGGCGCGATGCTACTGATCACCACGCTGTTAT  
CATCGTATCGCTATGTGCTAAAGCCTGTGTTGATTTTGTCTATTAATCATGGGCGCGGTGACCAGTTATTTTACTGACACT  
TATGGCACGGTCTATGATACGACCATGCTCCAAAATGCCCTACAGACCGACCAAGCCGAGACCAAGGATCTATTAACGC  
AGCGTTTATCATGCGTATCATTGGTTTGGGTGTGCTACCAAGTTTGCTTGTGGCTTTTGTTAAGGTGGATTATCCGACTT  
GGGGCAAGGGTTTGATGCGCCGATTGGGCTTGATCGTGGCAAGTCTTGCGCTGATTTTACTGCCTGTGGTGGCGTTCAGC  
AGTCATTATGCCAGTTTCTTTCGCGTGCATAAGCCGCTGCGTAGCTATGTCAATCCGATCATGCCAATCTACTCGGTGGG  
TAAGCTTGCCAGTATTGAGTATAAAAAAGCCAGTGCGCCAAAAGATACCATTTATCACGCCAAAGACGCGGTACAAGCAA  
CCAAGCCTGATATGCGTAAGCCACGCCTAGTGGTGTTCGTCGTCGGTGAGACGGCACGCGCCGATCATGTCAGCTTCAAT  
GGCTATGAGCGCGATACTTTCCACAGCTTGCCAAGATCGATGGCGTGACCAATTTTAGCAATGTCACATCGTGCGGCAC  
ATCGACGGCGTATTCTGTGCCGTGTATGTTTCAGCTATCTGGGCGCGGATGAGTATGATGTCGATACCGCCAAATACCAAG  
AAAATGTGCTGGATACGCTGGATCGCTTGGGCGTAAGTATCTTGTGGCGTGATAATAATTCGGACTCAAAGGCGTGATG  
GATAAGCTGCCAAAAGCGCAATTTGCCGATTATAAATCCGCGACCAACAACGCCATCTGCAACACCAATCCTTATAACGA  
ATGCCGCGATGTCGGTATGCTCGTTGGCTTAGATGACTTTGTGCTGCCAATAACGGCAAAGATATGCTGATCATGCTGC  
ACCAAATGGGCAATCACGGGCCTGCGTATTTTAAGCGATATGATGAAAAGTTTGCCAAATTCACGCCAGTGTGTGAAGGT  
AATGAGCTTGCCAAGTGCGAACATCAGTCCTTGATCAATGCTTATGACAATGCCTTGCTTGCCACCGATGATTTTCATCGC  
TCAAAGTATCCAGTGGCTGCAGACGCACAGCAATGCCTATGATGTCTCAATGCTGTATGTCAGCGATCATGGCGAAAGTC  
TGGGTGAGAACGGTGTCTATCTACATGGTATGCCAAATGCCTTTGCACCAAAAGAACAGCGCAGTGTGCCTGCATTTTC  
TGGACGGATAAGCAAACCTGGCATCACGCCAATGGCAACCGATACCGTCCTGACCCATGACGCGATCACGCCGACATTATT  
AAAGCTGTTTGATGTCACCGCGGACAAAGTCAAAGACCGCACCGCATTTCATCCGCTGATTTCTCCCTGTATTTTTTCCAA

ACCCACCGCACACTCCATTCGTATT

>MH602239.1 Escherichia coli strain TA007 isolate R49 plasmid phosphoethanolamine transferase MCR-1 (mcr-1) gene, complete cds

ATCCCACCGTTTATTTTTTGAGTAGTTTCTCATGATGCAGCATACTTCTGTGTGGTACCGACGCTCGGTCAGTCCGTTTG  
TTCTTGTGGCGAGTGTTGCCGTTTTCTTGACCGCGACCGCCAATCTTACCTTTTTTGATAAAATCAGCCAAACCTATCCC  
ATCGCGGACAATCTCGGCTTTGTGCTGACGATCGCTGTCGTGCTCTTTGGCGCGATGCTACTGATCACCACGCTGTTATC  
ATCGTATCGCTATGTGCTAAAGCCTGTGTTGATTTTGCTATTAATCATGGGCGCGGTGACCAGTTATTTTACTGACACTT  
ATGGCACGGTCTATGATACGACCATGCTCCAAAATGCCCTACAGACCGACCAAGCCGAGACCAAGGATCTATTAAACGCA  
GCGTTTATCATGCGTATCATTGGTTTGGGTGTGCTACCAAGTTTGCTTGTGGCTTTTGTTAAGGTGGATTATCCGACTTG  
GGGCAAGGGTTTGATGCGCCGATTGGGCTTGATCGTGGCAAGTCTTGCGCTGATTTTACTGCCTGTGGTGGCGTTCAGCA  
GTCATTATGCCAGTTTCTTTCGCGTGCATAAGCCGCTGCGTAGCTATGTCAATCCGATCATGCCAATCTACTCGGTGGGT  
AAGCTTGCCAGTATTGAGTATAAAAAAGCCAGTGCGCCAAAAGATACCATTTATCACGCCAAAGACGCGGTACAAGCAAC  
CAAGCCTGATATGCGTAAGCCACGCCTAGTGGTGTTTCGTTCGTTCGGTGAGACGGCACGCGCCGATCATGTCAGCTTCAATG  
GCTATGAGCGCGATACTTTCCACAGCTTGCCAAGATCGATGGCGTGACCAATTTTAGCAATGTCACATCGTGCGGCACA  
TCGACGGCGTATTCTGTGCCGTGTATGTTTCAAGCTATCTGGGCGCGGATGAGTATGATGTCGATACCGCCAAATACCAAGA  
AAATGTGCTGGATACGCTGGATCGCTTGGGCGTAAGTATCTTGTGGCGTGATAATAATTCGGACTCAAAGGCGTGATGG  
ATAAGCTGCCAAAAGCGCAATTTGCCGATTATAAATCCGCGACCAACAACGCCATCTGCAACACCAATCCTTATAACGAA  
TGCCGCGATGTCGGTATGCTCGTTGGCTTAGATGACTTTGTCGCTGCCAATAACGGCAAAGATATGCTGATCATGCTGCA  
CCAAATGGGCAATCACGGGCCTGCGTATTTAAGCGATATGATGAAAAGTTTGCCAAATTCACGCCAGTGTGTGAAGGTA  
ATGAGCTTGCCAAGTGCGAACATCAGTCCTTGATCAATGCTTATGACAATGCCTTGCTTGCCACCGATGATTCATCGCT

CAAAGTATCCAGTGGCTGCAGACGCACAGCAATGCCTATGATGTCTCAATGCTGTATGTCAGCGATCATGGCGAAAGTCT  
GGGTGAGAACGGTGTCTATCTACATGGTATGCCAAATGCCTTTGCACCAAAGAAGACAGCGCAGTGTGCCTGCATTTTTCT  
GGACGGATAAGCAAACCTGGCATCACGCCAATGGCAACCGATACCGTCCTGACCCATGACGCGATCACGCCGACATTATTA  
AAGCTGTTTGATGTCACCGCGGACAAAGTCAAAGACCGCACCGCATTTCATCCGCTGATTTCTCCCTGTATTTTTTCCAAA  
CCCACCGCACACTCCATTCGTA

>MH602238.1 Escherichia coli strain TA007 isolate R48 plasmid phosphoethanolamine transferase MCR-1 (mcr-1) gene, complete cds

TATCCCACCGTTTATTTTTTGAGTAGTTTCTCATGATGCAGCATACTTCTGTGTGGTACCGACGCTCGGTCAGTCCGTTT  
GTTCTTGTGGCGAGTGTGCGGTTTTCTTGACCGCGACCGCCAATCTTACCTTTTTTGATAAAATCAGCCAAACCTATCC  
CATCGCGGACAATCTCGGCTTTGTGCTGACGATCGCTGTCGTGCTCTTTGGCGCGATGCTACTGATCACCACGCTGTTAT  
CATCGTATCGCTATGTGCTAAAGCCTGTGTTGATTTTGCTATTAATCATGGGCGCGGTGACCAGTTATTTTACTGACACT  
TATGGCACGGTCTATGATACGACCATGCTCCAAAATGCCCTACAGACCGACCAAGCCGAGACCAAGGATCTATTAACGC  
AGCGTTTATCATGCGTATCATTGGTTTGGGTGTGCTACCAAGTTTGCTTGTGGCTTTTGTAAAGGTGGATTATCCGACTT  
GGGGCAAGGGTTTGATGCGCCGATTGGGCTTGATCGTGGCAAGTCTTGCGCTGATTTTACTGCCTGTGGTGGCGTTCAGC  
AGTCATTATGCCAGTTTCTTTCGCGTGCATAAGCCGCTGCGTAGCTATGTCAATCCGATCATGCCAATCTACTCGGTGGG  
TAAGCTTGCCAGTATTGAGTATAAAAAAGCCAGTGCGCCAAAAGATACCATTTATCACGCCAAAGACGCGGTACAAGCAA  
CCAAGCCTGATATGCGTAAGCCACGCCTAGTGGTGTTCGTCGTCGGTGAGACGGCACGCGCCGATCATGTCAGCTTCAAT  
GGCTATGAGCGCGATACTTTCCACAGCTTGCCAAGATCGATGGCGTGACCAATTTTAGCAATGTCACATCGTGCGGCAC  
ATCGACGGCGTATTCTGTGCCGTGTATGTTTCAGCTATCTGGGCGCGGATGAGTATGATGTCGATACCGCCAAATACCAAG  
AAAATGTGCTGGATACGCTGGATCGCTTGGGCGTAAGTATCTTGTGGCGTGATAATAATTCGGACTCAAAGGCGTGATG

GATAAGCTGCCAAAAGCGCAATTTGCCGATTATAAATCCGCGACCAACAACGCCATCTGCAACACCAATCCTTATAACGA  
ATGCCGCGATGTCGGTATGCTCGTTGGCTTAGATGACTTTGTGCTGCCAATAACGGCAAAGATATGCTGATCATGCTGC  
ACCAAATGGGCAATCACGGGCCTGCGTATTTTAAGCGATATGATGAAAAGTTTGCCAAATTCACGCCAGTGTGTGAAGGT  
AATGAGCTTGCCAAGTGCGAACATCAGTCCTTGATCAATGCTTATGACAATGCCTTGCTTGCCACCGATGATTTTCATCGC  
TCAAAGTATCCAGTGGCTGCAGACGCACAGCAATGCCTATGATGTCTCAATGCTGTATGTCAGCGATCATGGCGAAAGTC  
TGGGTGAGAACGGTGTCTATCTACATGGTATGCCAAATGCCTTTGCACCAAAGAAGAACAGCGCAGTGTGCCTGCATTTTTC  
TGGACGGATAAGCAAACCTGGCATCACGCCAATGGCAACCGATACCGTCCTGACCCATGACGCGATCACGCCGACATTATT  
AAAGCTGTTTGATGTCACCGCGGACAAAGTCAAAGACCGCACCGCATTTCATCCGCTGATTTCTCCCTGTATTTTTTCCAA  
ACCCACCGCACACTCCATTCGTATTA

>MH602237.1 Escherichia coli strain TA007 isolate R45 plasmid phosphoethanolamine transferase MCR-1 (mcr-1) gene, complete cds

ATGATGCAGCATACTTCTGTGTGGTACCGACGCTCGGTCAGTCCGTTTGTTCCTTGTGGCGAGTGTTGCCGTTTTCTTGAC  
CGCGACCGCCAATCTTACCTTTTTTGATAAAATCAGCCAAACCTATCCCATCGCGGACAATCTCGGCTTTGTGCTGACGA  
TCGCTGTCGTGCTCTTTGGCGCGATGCTACTGATCACCACGCTGTTATCATCGTATCGCTATGTGCTAAAGCCTGTGTTG  
ATTTTGCTATTAATCATGGGCGCGGTGACCAGTTATTTTACTGACACTTATGGCACGGTCTATGATACGACCATGCTCCA  
AAATGCCCTACAGACCGACCAAGCCGAGACCAAGGATCTATTAAACGCAGCGTTTATCATGCGTATCATTGGTTTGGGTG  
TGCTACCAAGTTTGCTTGTGGCTTTTGTTAAGGTGGATTATCCGACTTGGGGCAAGGGTTTGATGCGCCGATTGGGCTTG  
ATCGTGGCAAGTCTTGCGCTGATTTTACTGCCTGTGGTGGCGTTCAGCAGTCATTATGCCAGTTTCTTTCGCGTGCATAA  
GCCGCTGCGTAGCTATGTCAATCCGATCATGCCAATCTACTCGGTGGGTAAAGCTTGCCAGTATTGAGTATAAAAAAGCCA  
GTGCGCCAAAAGATACCATTATCACGCCAAAGACGCGGTACAAGCAACCAAGCCTGATATGCGTAAGCCACGCCTAGTG

GTGTTTCGTCGTCGGTGAGACGGCACGCGCCGATCATGTCAGCTTCAATGGCTATGAGCGCGATACTTTCCCACAGCTTGC  
CAAGATCGATGGCGTGACCAATTTTAGCAATGTCACATCGTGCGGCACATCGACGGCGTATTCTGTGCCGTGTATGTTCA  
GCTATCTGGGCGCGGATGAGTATGATGTCGATACCGCCAAATACCAAGAAAATGTGCTGGATACGCTGGATCGCTTGGGC  
GTAAGTATCTTGTGGCGTGATAATAATTCGGACTCAAAGGGCGTGATGGATAAGCTGCCAAAAGCGCAATTTGCCGATTA  
TAAATCCGCGACCAACAACGCCATCTGCAACACCAATCCTTATAACGAATGCCGCGATGTCGGTATGCTCGTTGGCTTAG  
ATGACTTTGTGCGCTGCCAATAACGGCAAAGATATGCTGATCATGCTGCACCAAATGGGCAATCACGGGCCTGCGTATTTT  
AAGCGATATGATGAAAAGTTTGCCAAATTCACGCCAGTGTGTGAAGGTAATGAGCTTGCCAAGTGCGAACATCAGTCCTT  
GATCAATGCTTATGACAATGCCTTGCTTGCCACCGATGATTTTCATCGCTCAAAGTATCCAGTGGCTGCAGACGCACAGCA  
ATGCCTATGATGTCTCAATGCTGTATGTCAGCGATCATGGCGAAAGTCTGGGTGAGAACGGTGTCTATCTACATGGTATG  
CCAAATGCCTTTGCACCAAAAGAACAGCGCAGTGTGCCTGCATTTTTCTGGACGGATAAGCAAACCTGGCATCACGCCAAT  
GGCAACCGATACCGTCCTGACCCATGACGCGATCACGCCGACATTATTAAAGCTGTTTGATGTCACCGCGGACAAAGTCA  
AAGACCGCACCGCATTTCATCCGCTGA

>MH395740.1 Escherichia coli plasmid pRMCR55 phosphoethanolamine transferase MCR-1 (mcr-1) gene, complete cds

GCCGCATTATCCCACCGTTTATTTTTTGAGTAGTTTCTCATGATGCAGCATACTTCTGTGTGGTACCGACGCTCGGTCAG  
TCCGTTTGTTCCTTGTGGCGAGTGTTGCCGTTTTCTTGACCGCGACCGCCAATCTTACCTTTTTTGATAAAATCAGCCAAA  
CCTATCCCATCGCGGACAATCTCGGCTTTGTGCTGACGATCGCTGTCGTGCTCTTTGGCGCGATGCTACTGATCACCACG  
CTGTTATCATCGTATCGCTATGTGCTAAAGCCTGTGTTGATTTTGCTATTAATCATGGGCGCGGTGACCAGTTATTTTAC  
TGACACTTATGGCACGGTCTATGATACGACCATGCTCCAAAATGCCCTACAGACCGACCAAGCCGAGACCAAGGATCTAT  
TAAACGCAGCGTTTATCATGCGTATCATTGGTTTGGGTGTGCTACCAAGTTTGCTTGTGGCTTTTGTAAAGGTGGATTAT

CCGACTTGGGGCAAGGGTTTGATGCGCCGATTGGGCTTGATCGTGGCAAGTCTTGCGCTGATTTTACTGCCTGTGGTGGC  
GTTTACAGCAGTCATTATGCCAGTTTCTTTTCGCGTGCATAAGCCGCTGCGTAGCTATGTCAATCCGATCATGCCAATCTACT  
CGGTGGGTAAAGCTTGCCAGTATTGAGTATAAAAAAGCCAGTGCGCCAAAAGATACCATTTATCACGCCAAAGACGCGGTA  
CAAGCAACCAAGCCTGATATGCGTAAGCCACGCCTAGTGGTGTTCGTTCGTTCGGTGAGACGGCACGCGCCGATCATGTCAG  
CTTCAATGGCTATGAGCGCGATACTTTCCACAGCTTGCCAAGATCGATGGCGTGACCAATTTTAGCAATGTCACATCGT  
GCGGCACATCGACGGCGTATTCTGTGCCGTGTATGTTTACAGCTATCTGGGCGCGGATGAGTATGATGTCGATACCGCCAAA  
TACCAAGAAAATGTGCTGGATACGCTGGATCGCTTGGGCGTAAGTATCTTGTGGCGTGATAATAATTTCGGACTCAAAGG  
CGTGATGGATAAGCTGCCAAAAGCGCAATTTGCCGATTATAAATCCGCGACCAACAACGCCATCTGCAACACCAATCCTT  
ATAACGAATGCCGCGATGTCGGTATGCTCGTTGGCTTAGATGACTTTGTCGCTGCCAATAACGGCAAAGATATGCTGATC  
ATGCTGCACCAAATGGGCAATCACGGGCCTGCGTATTTTAAGCGATATGATGAAAAGTTTGCCAAATTCACGCCAGTGTG  
TGAAGGTAATGAGCTTGCCAAGTGCGAACATCAGTCCTTGATCAATGCTTATGACAATGCCTTGCTTGCCACCGATGATT  
TCATCGCTCAAAGTATCCAGTGGCTGCAGACGCACAGCAATGCCTATGATGTCTCAATGCTGTATGTCAGCGATCATGGC  
GAAAGTCTGGGTGAGAACGGTGTCTATCTACATGGTATGCCAAATGCCTTTGCACCAAAGAAGACAGCGCAGTGTGCCTGC  
ATTTTTCTGGACGGATAAGCAAACCTGGCATCACGCCAATGGCAACCGATACCGTCCTGACCCATGACGCGATCACGCCGA  
CATTATTAAAGCTGTTTGATGTCACCGCGGACAAAAGTCAAAGACCGCACCGCATTTCATCCGCTGATTTCTCCCTGTATTT  
TTTCAAACCCACCGCACACTCCATTCGTATTATGG

>KX580711.1 Escherichia coli strain ZJ276 plasmid transposase, phosphoethanolamine transferase (mcr-1), and hypothetical protein genes, complete cds

TTCCAAATGATGAGTACTTCTACCGACATCTTACAATAAACGAGCGAGAAAAGATAATGATTTTACTCGCACAGGGCAA  
AAAACAAGCAGAAATTGCCAAAGCACTGGGACGTAGCTCCAGCACCATTTCTCGCGAGCTGAAACGACACGCTCTAGAAA

GCTACAGTGCAACGAACGCACAAAACAGCTATTTGAAGCATCGTCAAAATAGCAAAGCACAGCGCAAATTAGAGCAGCCT  
GAATATTTCAATTTGGTGCAAGAAAAGTTTCTGACAGAAAACCTGGTCGCCCCGAACAAATCAGCGCACGATTAAAATTGGA  
AAAATCTGAATTATCCATTAGTTATTCAACCATTTATCGTGGTATTTATTCAGGGTTGTTTGATATAGGCGAACGCAAAG  
CCAGTCGCAAACCTGCGCCACAAAGGCAAAACACGGCATACAAAAAATCATCATGAAAAACGTGGCAAATTCAGATATCC  
AACCATTTGAACGACCGTCCCATTTTCGGCGCAAAATCGCAGTCGCTTTGGACATTGGGAAGCCGATACCGTACTGGGTAA  
AGCGGGTGGAGCTTGTTTGCTGACGCTGACGGAACGCAAAAGTCGTTTTGAGTTGGTGAAGAAAATTCCTGCCAAAAAAG  
CCGAAGCAGTCCAAAAAGCCATGATTGAATTGCTGGATTCACATATATTGCGGTCAATTACGCCAGACCGTGGTAAAGAA  
TTTGCCCAACATCGTTTGGTAAACAGAAGCACTGGGTGTAGAATTTTACTTCCCCGAGCCGCATCAACCGTGGACACGGGG  
AACGAATGAAAATACAAATGGGTACTTCGTGAATACTTTCCGAAGCACCAAGACATCAATCAGTGGAGCGAAGTTGATA  
TTCAACAGGTGATCAATAAACTGAATTTACGACCACGTAAATGTTTAGGTTGGAAAACACCTTATGAAGTTTACTTCAAA  
AAATCGTTGCACTTGGTTTGACAATTCAAGATACAAATTATAAATACTCTCAAGTGTATATTCAGTATGGGATTGCGCAA  
TGATTGCCTAATAAAAATTTCTGAAATATTTCTGTATCGCATAATTTTTTATATCAGATAAATTGTACTGGATTTCTTAAA  
AAATTGCAGTATAATTGCCGCAATTATCCCACCGTTTATTTTTTGAGTAGTTTCTCATGATGCAGCATACTTCTGTGTGG  
TACCGACGCTCGGTCAGTCCGTTTGTTCTTGTGGCGAGTGTTGCCGTTTTCTTGACCGCGACCGCCAATCTTACCTTTTT  
TGATAAAATCAGCCAAACCTATCCCATCGCGGACAATCTCGGCTTTGTGCTGACGATCGCTGTCGTGCTCTTTGGCGCGA  
TGCTACTGATCACCACGCTGTTATCATCGTATCGCTATGTGCTAAAGCCTGTGTTGATTTTGCTATTAATCATGGGCGCG  
GTGACCAGTTATTTTACTGACACTTATGGCACGGTCTATGATACGACCATGCTCCAAAATGCCCTACAGACCGACCAAGC  
CGAGACCAAGGATCTATTAAACGCAGCGTTTATCATGCGTATCATTGGTTTGGGTGTGCTACCAAGTTTGCTTGTGGCTT  
TTGTTAAGGTGGATTATCCGACTTGGGGCAAGGGTTTGATGCGCCGATTGGGCTTGATCGTGGCAAGTCTTGCGCTGATT

TTACTGCCTGTGGTGGCGTTCAGCAGTCATTATGCCAGTTTCTTTTCGCGTGCATAAGCCGCTGCGTAGCTATGTCAATCC  
GATCATGCCAATCTACTCGGTGGGTAAGCTTGCCAGTATTGAGTATAAAAAAGCCAGTGCGCCAAAAGATAACCATTTATC  
ACGCCAAAGACGCGGTACAAGCAACCAAGCCTGATATGCGTAAGCCACGCCTAGTGGTGTTCGTCGTCGGTGAGACGGCA  
CGCGCCGATCATGTCAGCTTCAATGGCTATGAGCGCGATACTTTCCACAGCTTGCCAAGATCGATGGCGTGACCAATTT  
TAGCAATGTCACATCGTGCGGCACATCGACGGCGTATTCTGTGCCGTGTATGTTTCACTATCTGGGCGCGGATGAGTATG  
ATGTCGATACCGCCAAATACCAAGAAAATGTGCTGGATACGCTGGATCGCTTGGGCGTAAGTATCTTGTGGCGTGATAAT  
AATTCGGACTCAAAGGCGTGATGGATAAGCTGCCAAAAGCGCAATTTGCCGATTATAAATCCGCGACCAACAACGCCAT  
CTGCAACACCAATCCTTATAACGAATGCCGCGATGTCGGTATGCTCGTTGGCTTAGATGACTTTGTGCGCTGCCAATAACG  
GCAAAGATATGCTGATCATGCTGCACCAAATGGGCAATCACGGGCCTGCGTATTTTAAGCGATATGATGAAAAGTTTGCC  
AAATTCACGCCAGTGTGTGAAGGTAATGAGCTTGCCAAGTGCGAACATCAGTCCTTGATCAATGCTTATGACAATGCCTT  
GCTTGCCACCGATGATTTTCATCGCTCAAAGTATCCAGTGGCTGCAGACGCACAGCAATGCCTATGATGTCTCAATGCTGT  
ATGTCAGCGATCATGGCGAAAGTCTGGGTGAGAACGGTGTCTATCTACATGGTATGCCAAATGCCTTTGCACCAAAAGAA  
CAGCGCAGTGTGCCTGCATTTTTCTGGACGGATAAGCAAACCTGGCATCACGCCAATGGCAACCGATACCGTCCTGACCCA  
TGACGCGATCACGCCGACATTATTAAAGCTGTTTGATGTCACCGCGGACAAAGTCAAAGACCGCACCGCATTTCATCCGCT  
GATTTCTCCCTGTATTTTTTCCAAACCCACCGCACACTCCATTCGTATTATGGGCGGTGGGGTGGGGTTTGTTATGCCGT  
ATTTATCAAATAAACGCCTACTTGCTGAGATGAGTATCGCTCTTGTCATGGCGATCGTTGCCACGCTGACCCTTGAGCAC  
AGTCAGATTGATCTGATGGTCGCTGATTGGTTTTATCTGGGTATGGGGCATTGGATGGTTGCCAAGCAAGCTTTTTTGCC  
AGATTTGCTACTGTATTCTGGACTAAAAAAGCTGCTGATGGCGATGCTGATCTACTTGCTGGTTGCGACCATTTGCCGTG  
CTTATCATGAGAAAAAGGGCAATGCTATCACTGCCAAGTGGCTTGTCAGTGACAAAATTTTCGCGTGCCTGAGCTTGCG



TATCTGGTGCTGACTTTGATCCTAGTGCCGACAGTTGTCGCGTCATTGAAGGCATATACTCATGTGGTCTGCCCTGTGCA  
TTTGACGATTTTTGATGGTACGCTGCCGTATTTGCCGATGCTTGATAGTATGCGTAACACCATTCTGATAAGTGCTTTC  
CTGCGGCGCATGCCAGTAGCGGATTTGCGCTGTTTGCCTTTTCGCTTTGCGCCAAGTTTTCGCGCCGCCGTCGTGGTGCGATC  
ATCATCGTGGTGATGGCATTGGGCTGGGCGATGGGCTGCTATAAGATGATTATTGGCGATCATTTTTTGAGCCATACGGT  
GGTGTGCGATGATGCTTGCGTGGGCGATGTCGGCAGGGCTTGCGTGGGTGTTTTTAAAGAAGGGTGAACAAGTTTAATCGG  
CTGAATTTACAATCCAAGTGCAACAAAAAAGAAGTACTCATCACTAGAATATAATTTTGTTCACACAAAAACCACT  
TCCAAATGATGAGTAC

>LC193130.1 Escherichia coli tnpA, mcr-1 genes for transposase, phosphoethanolamine transferase, hypothetical protein, complete cds, strain: NCGM-EC88

ATACGCTGAATTTACAATCCAAGTGCAACAAAAAAGAAGGACTAATCACTAGAATAGAATTTTGTTCACAAAAAAA  
CCAATTAAAAAAGATGAGTAAAAACTACCGACATCTTACAATAAACGAGCGAGAAAAGATAATGATTTTACTCGCACAGG  
GCAAAAAACAAGCAGAAATTGCCAAAGCACTGGGACGTAGCTCCAGCACCATTTCTCGCGAGCTGAAACGACACGCTCTA  
GAAAGCTACAGTGCAACGAACGCACAAAACAGCTATTTGAAGCATCGTCAAAATAGCAAAGCACAGCGCAAATTAGAGC  
A

GCCTGAATATTTCAATTTGGTGCAAGAAAAGTTTCTGACAGAAAAGTGGTCGCCCCGAACAAATCAGCGCACGATTAAAAT  
TGGA AAAAATCTGAATTATCCATTAGTTATTCAACCATTTATCGTGGTATTTATTCAGGGTTGTTTGATATAGGCGAACGC  
AAAGCCAGTCGCAAACTGCGCCACAAAGGCAAAACACGGCATACAAAAAATCATCATGAAAAACGTGGCAAAATTCAGA  
T

ATCCAACCATTTGAACGACCGTCCCATTTGGGCGCAAAATCGCAGTCGCTTTGGACATTGGGAAGCCGATACCGTACTGG  
GTAAAGCGGGTGGAGCTTGTTTGCTGACGCTGACGGAACGCAAAAGTCGTTTTGAGTTGGTGAAGAAAATTCCTGCCAAA

AAAGCCGAAGCAGTCCAAAAAGCCATGATTGAATTGCTGGATTCACATATATTGCGGTCAATTACGCCAGACCGTGGTAA  
AGAATTTGCCCAACATCGTTTGGTAACAGAAGCACTGGGTGTAGAATTTTACTTCCCCGAGCCGCATCAACCGTGGACAC  
GGGGAACGAATGAAAATACAAATGGGTACTTTCGTGAATACTTTCCGAAGCACCAAGACATCAATCAGTGGAGCGAAGTT  
GATATTCAACAGGTGATCAATAAACTGAATTTACGACCACGTAAATGTTTAGGTTGGAAAACACCTTATGAAGTTTACTT  
CAAAAAATCGTTGCACTTGGTTTGACAATTCAAGATACAAATTATAAATACTCTCAAGTGTATATTCAGTATGGGATTGC  
GCAATGATTGCCTAATAAAATTTCTGAAATATTTCTGTATCGCATAATTTTTTATATCAGATAAATTGTACTGGATTCT  
TAAAAAATTGCAGTATAATTGCCGCAATTATCCCACCGTTTATTTTTTGAGTAGTTTCTCATGATGCAGCATACTTCTGT  
GTGGTACCGACGCTCGGTCAGTCCGTTTGTCTTGTGGCGAGTGTTGCCGTTTCTTGACCGCGACCGCCAATCTTACCT  
TTTTTGATAAAATCAGCCAAACCTATCCCATCGCGGACAATCTCGGCTTGTGCTGACGATCGCTGTCGTGCTCTTTGGC  
GCGATGCTACTGATCACCACGCTGTTATCATCGTATCGCTATGTGCTAAAGCCTGTGTTGATTTTGCTATTAATCATGGG  
CGCGGTGACCAGTTATTTTACTGACACTTATGGCACGGTCTATGATACGACCATGCTCCAAAATGCCCTACAGACCGACC  
AAGCCGAGACCAAGGATCTATTAAACGCAGCGTTTATCATGCGTATCATTGGTTTGGGTGTGCTACCAAGTTTGCTTGTG  
GCTTTTGTTAAGGTGGATTATCCGACTTGGGGCAAGGGTTTGATGCGCCGATTGGGCTTGATCGTGGCAAGTCTTGCGCT  
GATTTTACTGCCTGTGGTGGCGTTCAGCAGTCATTATGCCAGTTTCTTTCGCGTGCATAAGCCGCTGCGTAGCTATGTCA  
ATCCGATCATGCCAATCTACTCGGTGGGTAAGCTTGCCAGTATTGAGTATAAAAAAGCCAGTGCGCCAAAAGATACCATT  
TATCACGCCAAAGACGCGGTACAAGCAACCAAGCCTGATATGCGTAAGCCACGCCTAGTGGTGTTTCGTGTCGGTGAGAC  
GGCACGCGCCGATCATGTCAGCTTCAATGGCTATGAGCGCGATACTTTCCCACAGCTTGCCAAGATCGATGGCGTGACCA  
ATTTTAGCAATGTCACATCGTGCGGCACATCGACGGCGTATTCTGTGCCGTGTATGTTTCACTATCTGGGCGCGGATGAG  
TATGATGTCGATACCGCCAAATACCAAGAAAATGTGCTGGATACGCTGGATCGCTTGGGCGTAAGTATCTTGTGGCGTGA

TAATAATTCGGACTCAAAAGGCGTGATGGATAAGCTGCCAAAAGCGCAATTTGCCGATTATAAAATCCGCGACCAACAACG  
CCATCTGCAACACCAATCCTTATAACGAATGCCGCGATGTCGGTATGCTCGTTGGCTTAGATGACTTTGTCGCTGCCAAT  
AACGGCAAAGATATGCTGATCATGCTGCACCAAATGGGCAATCACGGGCCTGCGTATTTTAAGCGATATGATGAAAAGTT  
TGCCAAATTCACGCCAGTGTGTGAAGGTAATGAGCTTGCCAAGTGCGAACATCAGTCCTTGATCAATGCTTATGACAATG  
CCTTGCTTGCCACCGATGATTTTCATCGCTCAAAGTATCCAGTGGCTGCAGACGCACAGCAATGCCTATGATGTCTCAATG  
CTGTATGTCAGCGATCATGGCGAAAGTCTGGGTGAGAACGGTGTCTATCTACATGGTATGCCAAATGCCTTTGCACCAA  
AGAACAGCGCAGTGTGCCTGCATTTTTCTGGACGGATAAGCAAACCTGGCATCACGCCAATGGCAACCGATACCGTCCTGA  
CCCATGACGCGATCACGCCGACATTATTAAAGCTGTTTGATGTCACCGCGGACAAAGTCAAAGACCGCACCGCATTTCATC  
CGCTGATTTCTCCCTGTATTTTTTCCAAACCCACCGCACACTCCATTCGTATTATGGGCGGTGGGGTGGGGTTTGTTATG  
CCGTATTTATCAAATAAACGCCTACTTGCTGAGATGAGTATCGCTCTTGTCATGGCGATCGTTGCCACGCTGACCCTTGA  
GCACAGTCAGATTGATCTGATGGTCGCTGATTGGTTTTATCTGGGTATGGGGCATTGGATGGTTGCCAAGCAAGCTTTTT  
TGCCAGATTTGCTACTGTATTCTGGACTAAAAAAGCTGCTGATGGCGATGCTGATCTACTTGCTGGTTGCGACCATTTCG  
CGTGCTTATCATGAGAAAAAGGGCAATGCTATCACTGCCAAGTGGCTTGACGTATAGGAAATTGAAAAACCAGTCGATAC  
CATTGTCCACGCCTTATGCCACGTGAGCCTTTCTGCTTTTCCCACCACTCCGGTGGTTTCCCTCTCTGTATGGTCGATTT  
TTATACCGTAACAGGCTGTTTTTTATACTTTACCGATTCCCGGGCACACTTAGCCTGTGTCAGGCCGGCATATACCTCA  
GTAGACTGATATCCCGCGCGTTTTTCTTCAGCCCTGATACATTACAGCCCCGCAATGGCCCCGGCGGTATACCATCCGGCAG  
CCACACAGCACGCATTCTGAACGGGTCACGACTCAGGAACTGTTTCACCATTTGTGCATAGCACACTTTCGCCACTGGTTC  
CGGTTTATCCATCCCCAGTGACGGTACACCTGCGGCAGCTTCTCTCCACACACACGGTTGGCAAGGAACCCGAAGTACC  
TCACCATCTTAAAAAACTTCTCCGGGATGTGCTGTTTCAGCCTCGCGACCAGCTCACGCTGTGTCAGCGTTTCCGTGCGC

GTTTCTCCCGTTTTGTGGTCCAGGTAACGGAAGCTCAGGCTTGCCCCCTCCGTTGTAATGAGCCAGTCGGGAAGCCGCTAT  
TGGTGGCTTCTTCAGATAACGACCCAGGTAGCGTGCCGTATTCCGCCCTCCGGCTGTCTTCTTCGACATGTACACATGCC  
AGTATTTTCCGCCGGATTTACAGCACCAGGCTTCTCCACTGTGATTCCGTCGTGATATGTGACAACGACTCCGGCATTGCC  
ATCCCCTCTGACCACGCTTTCAGAAGCAGCTGCCGCATATTCCACATCCACCGTGAACGCATCGCGTCTTTCAGGAAGCT  
CAGCTTTTTTCCACTGACCATGCTTATTCAGACCTCCACAGGTTACAGACACATGTACATGCGGATGCCAGTTGAGACGAC  
GGCCATACGTGTGGATGGCGCAGAAGATAACGGGTTCCAGCCCCCGTTTTTCGGGCGGCATACAGCAGATTCTCCACCGCC  
AGACGGCACACGTCATTCAGCAGCCAGCGGTTGCTTTCGAACACCGGCCACAGCGTGTCCGGCAGGGTGAAGACCAGATG  
TACCCAGTCGCAGTCAGGAAGACGATTCAGCTGTGTTGCTGTCCACAGGTCTGTGGCCTTCTTTCGCGAGGACGGGCAGG  
CACGGCTGCCGCATGAGTTGGTCAGGTACTTTACGTGCTGACAGTCCGGGTTATCACACCCGAACCTCTTTTACACCCAGT  
ATCCGTGTGCCGCAGGCCAGCATTTTGGTGACGGCTTCAACCTCGATATCGCGCAGACCGCCCGCATCCAGGAAGGACGT  
CCAGCACTGGTTGGCTGTGAACAGACGTTTCAGAGGGCGGGGAGTAAAACCGGACAACATGAGGATGGATTAAACCCCGG  
TATCCTGTAGCAGGGTAAGGGCTGCTGTATCGCCACGGCGCTTCAGGATGGAGGTCGTCACCATCGCAGGTGGTGGGTCC  
ATGGGTTTGAGCATTTTCATCCAGTCCCATTCTCGTTGTGAGAGCTTCTCAGCACCAACAGAGAGCAGAACTGTATCGAT  
ACTTTTGCGGGTCAACATAAGGGGATGAGTCCTTAATAAAACAGGTCCTCAGAGCATAACATATTCTGCGGGGCGTGCGGC  
AACAACAGGACGAACCGGGGCGGTTTTCAATTTGCAGCCGCCAGGCTGCCGTGGTTCTCCAGTGACAAAATTTGCGGTG  
CGTGAGCTTGCGTATCTGGTGCTGACTTTGATCCTAGTGCCGACAGTTGTGCGGTCATTGAAGGCATATACTCATGTGGT  
CTGCCCTGTGCATTTGACGATTTTTGATGGTACGCTGCCGTATTTGCCGATGCTTGATAGTATGCGTAACACCATTCTG  
ATAAGTGCTTTCCTGCGGCGCATGCCAGTAGCGGATTTGCGCTGTTTGCTTTGCGTTTGCGCCAAGTTTGCGCCGCCGT  
CGTGGTGCGATCATCATCGTGGTGATGGCATTGGGCTGGGCGATGGGCTGCTATAAGATGATTATTGGCGATCATTTTTT

GAGCCATACGGTGGTGTTCGATGATGCTTGCGTGGGCGATGTCGGCAGGGCTTGCGTGGGTGTTTTTAAGAAGGGTGAAC  
AAGTTTAATCGGCTGAATTTACAATCCAAGTGCAACAAAAAAGAAGTACTCATCAACTAGAATATAATTTTGTTCAC  
ACAAAAACCACTTCCAAATGATGAGTACTT

>KX886345.1 Escherichia coli transposase (tnpA), MCR-1 (mcr-1), hypothetical protein, and transcriptional regulator (ydfA) genes,  
complete cds

ATCCTCTTATCCAGAGGGGGCATTAGTAACGTTTGATAGGCCATTTGAAATAATTGCCAATTCATATGAAGAATACCGTA  
CTCCAGTGTATGCGGTTTCTTTTCGAAGGATGAGTTTAGTGAAGATATTAAGACTTTTGAGTCATTGCACGACGCATCT  
GAATATAAAAATAAGATGCTTCAGGAGCACGGGCTTAACCAGGATGATATCTTAATCACACCTGTAACAAGAGAAGAAAT  
CGCCTTTAAAGGAATTAAGGACGCTGTTAATGACGCTAATATGGCAGTGATGGAACAGGCGGGGGATTTCGTCCAGAGAAT  
CACCAGAAGAGATACTCGCCAGTATTTAGCTAACGAGCATATGATCTCCGGGCTTGAAAACCTTCCTGGTTAAAGACCGT  
TCTCAGTTCAGTTCCTGCAATGGGGATATCGTTGTGGAGGCGGAAATTACCAGGGGGGAAGGTGGTCTTTATCACCTTGC  
GGTCGCTGGTAAGCATGGCTTAGAGCGTGGTGATGCAGTTGCCAGAGTGGATGTTACGGAGCAGCAATTTGCCGCGATCA  
CTGGAAAAACACCTTCTGAAGTTTTAACGGGGGACCAAACATCGGCTCGTGTTCCGGTAATTACAGGTATCCATTTAGT  
ACAAGGGCTATTGAAAATGTGAATAAACTGGAACAACAGAAGGATTATGTCTATTTCTCAACACATGAAGGCCTGAATGC  
TGAAATAAAAGATTTAGCTCTCTCAAGGATGCTATTGAGTGGGGCCGGGTGAATGCGAGCTACATGATCTCAATAAGC  
GCGATACTGTCATTTATCGCGTCGAGTCTGAACATATTTCTCAGGGGATTGACGCTGTAATGAAAAATGCTGAACGCGTG  
GAGCGTCATGAAATTGAGAAAGCACAGGGACGGGATTGCACGCCGGAAGACGGCAAGATTCTTGAGGCAATTGATCGCTT  
TGAGGACAAGTTCAGAGGGGAAGGACTGAAGTTCGAAAGGGAGAAGGCCGAATCCGATTTGCTTAATCACGGATTCATC  
GTGAAATGGCAGAAGATGCTCTTGGAACAATTTGTCCAGGCCAGAGAAGAACATCTGGAATTGCAGCAACAGCGTGAC  
AATTCACAGGACATGCACTAATTAAGAAAAAAGCCCGTTTTTCGGGCTTTTTAAGAGCTGAATTTACAATCCAAGTGCAA

CAAAAAAGAAGTACTCATCAACTAGAAATATAATTTGTTTCCACACAAAAACCATTTCCAAATGATGAGTACTTCCTAC  
CGACATCTTACAATAAACGAGCGAGAAAAGATAATGATTTTACTCGCACAGGGCAAAAAACAAGCAGAAATTGCCAAAGC  
ACTGGGACGTAGCTCCAGCACCATTTCTCGCGAGCTGAAACGACACGCTCTAGAAAGCTACAGTGCAACGAACGCACAAA  
ACAGCTATTTGAAGCATCGTCAAAATAGCAAAGCACAGCGCAAATTAGAGCAGCCTGAATATTTCAATTTGGTGCAAGAA  
AAGTTTCTGACAGAAAACCTGGTCGCCCCGAACAAATCAGCGCACGATTAATAATTGGAAAAATCTGAATTATCCATTAGTTA  
TTCAACCATTTATCGTGGTATTTATTCAGGGTTGTTTGATATAGGCGAACGCAAAGCCAGTCGCAAACCTGCGCCACAAAG  
GCAAAACACGGCATACAAAAAATCATCATGAAAAACGTGGCAAATTCAGATATCCAACCATTTGAACGACCGTCCCATT  
TCGGCGCAAATCGCAGTCGCTTTGGACATTGGGAAGCCGATACCGTACTGGGTAAAGCGGGTGGAGCTTGTTTGCTGAC  
GCTGACGGAACGCAAAGTCGTTTTGAGTTGGTGAAGAAAATTCCTGCCAAAAAGCCGAAGCAGTCCAAAAAGCCATGA  
TTGAATTGCTGGATTCACATATATTGCGGTCAATTACGCCAGACCGTGGTAAAGAATTTGCCCAACATCGTTTGGTAACA  
GAAGCACTGGGTGTAGAATTTTACTTCCCCGAGCCGCATCAACCGTGGACACGGGGAACGAATGAAAATACAAATGGGTT  
ACTTCGTGAATACTTTCCGAAGCACCAAGACATCAATCAGTGGAGCGAAGTTGATATTCAACAGGTGATCAATAAACTGA  
ATTTACGACCACGTAAATGTTTAGGTTGGAAAACACCTTATGAAGTTTACTTCAAAAAATCGTTGCACTTGGTTTGACAA  
TTCAAGATACAAATTATAAATACTCTCAAGTGTATATTCAGTATGGGATTGCGCAATGATTGCCTAATAAAATTTCTGAA  
ATATTTCTGTATCGCATAATTTTTTATATCAGATAAATTGTACTGGATTTCTTAAAAAATTGCAGTATAATTGCCGTAAT  
TATCCCACCGTTTATTTTTTGAGTAGTTTCTCATGATGCAGCATACTTCTGTGTGGTACCGACGCTCGGTCAGTCCGTTT  
GTTCTTGTGGCGAGTGTTGCCGTTTTCTTGACCGCGACCGCCAATCTTACCTTTTTTGATAAAATCAGCCAAACCTATCC  
CATCGCGGACAATCTCGGCTTTGTGCTGACGATCGCTGTCGTGCTCTTTGGCGCGATGCTACTGATCACCACGCTGTTAT  
CATCGTATCGCTATGTGCTAAAGCCTGTGTTGATTTTGCTATTAATCATGGGCGCGGTGACCAGTTATTTTACTGACACT

TATGGCACGGTCTATGATACGACCATGCTCCAAAATGCCCTACAGACCGACCAAGCCGAGACCAAGGATCTATTAAACGC  
AGCGTTTATCATGCGTATCATTGGTTTGGGTGTGCTACCAAGTTTGCTTGTGGCTTTTGTAAAGGTGGATTATCCGACTT  
GGGGCAAGGGTTTGATGCGCCGATTGGGCTTGATCGTGGCAAGTCTTGCGCTGATTTTACTGCCTGTGGTGGCGTTCAGC  
AGTCATTATGCCAGTTTCTTTCGCGTGCATAAGCCGCTGCGTAGCTATGTCAATCCGATCATGCCAATCTACTCGGTGGG  
TAAGCTTGCCAGTATTGAGTATAAAAAAGCCAGTGCGCCAAAAGATACCATTTATCACGCCAAAGACGCGGTACAAGCAA  
CCAAGCCTGATATGCGTAAGCCACGCCTAGTGGTGTTCGTCGTCGGTGAGACGGCACGCGCCGATCATGTCAGCTTCAAT  
GGCTATGAGCGCGATACTTTCCACAGCTTGCCAAGATCGATGGCGTGACCAATTTTAGCAATGTCACATCGTGCGGCAC  
ATCGACGGCGTATTCTGTGCCGTGTATGTTTCACTATCTGGGCGCGGATGAGTATGATGTCGATACCGCCAAATACCAAG  
AAAATGTGCTGGATACGCTGGATCGCTTGGGCGTAAGTATCTTGTGGCGTGATAATAATTCGGACTCAAAAGGCGTGATG  
GATAAGCTGCCAAAAGCGCAATTTGCCGATTATAAATCCGCGACCAACAACGCCATCTGCAACACCAATCCTTATAACGA  
ATGCCGCGATGTCGGTATGCTCGTTGGCTTAGATGACTTTGTGCTGCCAATAACGGCAAAGATATGCTGATCATGCTGC  
ACCAAATGGGCAATCACGGGCCTGCGTATTTTAAGCGATATGATGAAAAGTTTGCCAAATTCACGCCAGTGTGTGAAGGT  
AATGAGCTTGCCAAGTGCGAACATCAGTCCTTGATCAATGCTTATGACAATGCCTTGCTTGCCACCGATGATTTTCATCGC  
TCAAAGTATCCAGTGGCTGCAGACGCACAGCAATGCCTATGATGTCTCAATGCTGTATGTCAGCGATCATGGCGAAAGTC  
TGGGTGAGAACGGTGTCTATCTACATGGTATGCCAAATGCCTTTGCACCAAAAGAACAGCGCAGTGTGCCTGCATTTTTC  
TGGACGGATAAGCAAACCTGGCATCACGCCAATGGCAACCGATACCGTCCTGACCCATGACGCGATCACGCCGACATTATT  
AAAGCTGTTTGATGTCACCGCGGACAAAGTCAAAGACCGCACCGCATTTCATCCGCTGATTTCTCCCTGTATTTTTTCAA  
ACCCACCGCACACTCCATTCGTATTATGGGCGGTGGGGTGGGGTTTGTATGCCGTATTTATCAAATAAACGCCTACTTG  
CTGAGATGAGTATCGCTCTTGTTCATGGCGATCGTTGCCACGCTGACCCTTGAGCACAGTCAGATTGATCTGATGGTCGCT

GATTGGTTTTATCTGGGTATGGGGCATTGGATGGTTGCCAAGCAAGCTTTTTTGCCAGATTGCTACTGTATTCTGGACT  
AAAAAAGCTGCTGATGGCGATGCTGATCTACTTGCTGGTTGCGACCATTTGCCGTGCTTATCATGAGAAAAAGGGCAATG  
CTATCACTGCCAAGTGGCTTGTCCCAGTGACAAAATTTGCGGTGCGTGAGCTTGCGTATCTGGTGCTGACTTTGATCCTA  
GTGCCGACAGTTGTCGCGTCATTGAAGGCATATACTCATGTGGTCTGCCCTGTGCATTTGACGATTTTTGATGGTACGCT  
GCCGTATTTGCCGATGCTTGATAGTATGCGTAACACCATTCTGATAAGTGCTTTCCTGCGGGCGCATGCCAGTAGCGGAT  
TTGCGCTGTTTGCCTTTGCGTTTGCGCCAAGTTTGCGCCGCCGTGCGTGGTGCGATCATCATCGTGGTGATGGCATTGGGC  
TGGGCGATGGGCTGCTATAAGATGATTATTGGCGATCATTTTTTGAGCCATACGGTGGTGTGCGATGATGCTTGCGTGGGC  
GATGTCGGCAGGGCTTGCGTGGGTGTTTTTAAGAAGGGTGAACAAGTTCAAGGAAAAAATCAACCCCAAACAGAAATA  
ACAGCTACAAAAATGGACAGTAATAATGCAATAAAAGTAATGTTGAGCCATATGTTGGACGAGTCTTTTAAGACTAATGA  
GGCTGTTAATGCCATTGTAATGAACTAATGATAATAATGGCTGCAAATAAATATTGTACAATGTTTTTTATTGTACTTG  
GTTGCTCCCCAATTCTTTCTCTGTAATTTGCATCAACATTAGATATCCATTGAAGTAATAGAGCAATAAAACAGCCTACT  
CCGCAAACGGTGAATTGCACAGACGTCGGGTTTGAATCAAACAACGAGATCGCTAAGTTATATAAGTATACCGCGCCTGA  
AATCACCCCGACAATAAATAGAGATGAGTATAATCCGAAGAATAATGTATTGCTTTCCTTTAAGGAATATATTAAAG  
CCGCTTTTTCGTATTCTTTCATGATTTAATCCAGTCTATAAGTATAAGAACCAACAAAACACTGTCCAGGATTCATTTTCTG  
TGAGCATATGAAATCCCATCCAGAGTGATGATACTGGCAGAAACACGCCCACAGCCGAATTATTAGTCTGGCGGAGAAT  
ATCCTTATCAGGAGTATCAATAGTGATAAGAACAGAAAAAGAGTGATCATGTGGAAAAACATTCACATCACCTATAACAC  
TATTAAGATAGCCTGCCAGATATCCATTTAGACAGGCTATATACAGGGTTCAATTCATTCTATGAAAGGTGTATAGGGA  
TTGCTGATGTTTGTGTGATCAAAAATCTAATATTAATAGATGAGAACTAATATACATATTTCCAGACGGATGGGGGGAT  
TTTATCGTAGAGTTTATTCATTGTGAGTTCTGCAAGCCTGTGATCGGCGGCGGCATTAAACGACTCAAGCTCAGAAGGAG



GGAGGCTGTTTTGGTTTTTTTCAATAATCTTTTCAAGTGTGTCGAGTGTGAGCAACGTCTTAACTGAAAGAGCCAGTCT  
TGTTTTGTTTTTATTGTACAATTCCTGAAGAACATCCTTGTCCTATAGTAGCTACAACGATGTTTGATTCTACTGCTGG  
ATTTATTTCTTACTTTTTTGTGTAAACTCAAATCCCAGTTTCCCGGTTGCTTTGTCAACCAGTTTTACTTTTGCTGAAAA  
TTCTTTGTTTGTTTTTTGACTAATGAAACCTTTCAATTCACTTGTAACCTCTTTTGTTAT

>KX458104.1 Escherichia coli strain NDM132 plasmid pls1 insertion sequence ISAp1 integrase (int) gene, complete cds; mcr-1 (mcr-1) and hypothetical protein genes, complete cds; insertion sequence truncated ISAp1, complete sequence; insertion sequence ISKpn26 transposase (tnp) gene, complete cds; and insertion sequence truncated ISAp1, complete sequence

CAGCCAGAAGATGCTGGTGGCTCGATATAAAAAATGGTTGGGTAATGGTGGATTGTTTTCTGTTTCATCATACCAAACCTA  
AGAAAAAAGCAAAAAACAAACTACTGTGGCTAAGCCTCAACTTAAAGAGGCTGAATTTACAATCCAAGTGCAACAAAAA  
AAGAAGTACTCATCAACTAGAAATATAATTTTGTTCACACAAAAACCATTTCCAAATGATGAGTACTTCCTACCGACAT  
CTTACAATAAACGAGCGAGAAAAGATAATGATTTTACTCGCACAGGGCAAAAAACAAGCAGAAATTGCCAAAGCACTGGG  
ACGTAGCTCCAGCACCATTCTCGCGAGCTGAAACGACACGCTCTAGAAAGCTACAGTGCAACGAACGCACAAAACAGCT  
ATTTGAAGCATCGTCAAAATAGCAAAGCACAGCGCAAATTAGAGCAGCCTGAATATTTCAATTTGGTGCAAGAAAAGTTT  
CTGACAGAAAACCTGGTCGCCCCGAACAAATCAGCGCACGATTAAAATTGGAAAAATCTGAATTATCCATTAGTTATTCAAC  
CATTTATCGTGGTATTTATTCAGGGTTGTTTGATATAGGCGAACGCAAAGCCAGTCGCAAACCTGCGCCACAAAGGCAAAA  
CACGGCATACAAAAAATCATCATGAAAAACGTGGCAAAATTCAGATATCCAACCATTGTAACGACCGTCCCATTTCGGCG  
CAAAATCGCAGTCGCTTTGGACATTGGGAAGCCGATACCGTACTGGGTAAAGCGGGTGGAGCTTGTTTGCTGACGCTGAC  
GGAACGCAAAAGTCGTTTTGAGTTGGTGAAGAAAATTCCTGCCAAAAAAGCCGAAGCAGTCCAAAAAGCCATGATTGAAT  
TGCTGGATTACATATATTGCGGTCAATTACGCCAGACCGTGGTAAAGAATTTGCCCAACATCGTTTGGTAACAGAAGCA  
CTGGGTGTAGAATTTTACTTCCCCGAGCCGCATCAACCGTGGACACGGGGAACGAATGAAAATACAAATGGGTTACTTCG

TGAATACTTTCCGAAGCACCAAGACATCAATCAGTGGAGCGAAGTTGATATTCAACAGGTGATCAATAAACTGAATTTAC  
GACCACGTAAATGTTTAGGTTGGAAAACACCTTATGAAGTTTACTTCAAAAAATCGTTGCACTTGGTTTGACAATTCAAG  
ATACAAATTATAAATACTCTCAAGTGTATATTCAGTATGGGATTGCGCAATGATTGCCTAATAAAAATTTCTGAAATATTT  
CTGTATCGCATAATTTTTTATATCAGATAAATTGTACTGGATTTCTTAAAAAATTGCAGTATAATTGCCGCAATTATCCC  
ACCGTTTATTTTTTTAATAGTTTCTCATGATGCAGCATACTTCTGTGTGGTACCGACGCTCGGTGAGTCCGTTTGTTCTT  
GTGGCGAGTGTGCGGTTTTCTTGACCGCGACCGCCAATCTTACCTTTTTTGATAAAATCAGCCAAACCTATCCCATCGC  
GGACAATCTCGGCTTTGTGCTGACGATCGCTGTCGTGCTCTTTGGCGCGATGCTACTGATCACCACGCTGTTATCATCGT  
ATCGCTATGTGCTAAAGCCTGTGTTGATTTTGCTATTAATCATGGGCGCGGTGACCAGTTATTTTACTGACACTTATGGC  
ACGGTCTATGATACGACCATGCTCCAAAATGCCCTACAGACCGACCAAGCCGAGACCAAGGATCTATTAAACGCAGCGTT  
TATCATGCGTATCATTGGTTTGGGTGTGCTACCAAGTTTGCTTGTGGCTTTTGTTAAGGTGGATTATCCGACTTGGGGCA  
AGGGTTTGATGCGCCGATTGGGCTTGATCGTGGCAAGTCTTGCGCTGATTTTACTGCCTGTGGTGGCGTTCAGCAGTCAT  
TATGCCAGTTTCTTTCGCGTGCATAAGCCGCTGCGTAGCTATGTCAATCCGATCATGCCAATCTACTCGGTGGGTAAGCT  
TGCCAGTATTGAGTATAAAAAAGCCAGTGCGCCAAAAGATACCATTTATCACGCCAAAGACGCGGTACAAGCAACCAAGC  
CTGATATGCGTAAGCCACGCCTAGTGGTGTTCGTCGTCGGTGAGACGGCACGCGCCGATCATGTCAGCTTCAATGGCTAT  
GAGCGCGATACTTTCCACAGCTTGCCAAGATCGATGGCGTGACCAATTTTAGCAATGTCACATCGTGCGGCACATCGAC  
GGCGTATTCTGTGCCGTGTATGTTTCACTATCTGGGCGCGGATGAGTATGATGTCGATACCGCCAAATACCAAGAAAATG  
TGCTGGATACGCTGGATCGCTTGGGCGTAAGTATCTTGTGGCGTGATAATAATTCGGACTCAAAGGCGTGATGGATAAG  
CTGCCAAAAGCGCAATTTGCCGATTATAAATCCGCGACCAACAACGCCATCTGCAACACCAATCCTTATAACGAATGCCG  
CGATGTCGGTATGCTCGTTGGCTTAGATGACTTTGTCGCTGCCAATAACGGCAAAGATATGCTGATCATGCTGCACCAA

TGGGCAATCACGGGCCTGCGTATTTTAAGCGATATGATGAAAAGTTTGCCAAATTCACGCCAGTGTGTGAAGGTAATGAG  
CTTGCCAAGTGCGAACATCAGTCCTTGATCAATGCTTATGACAATGCCTTGCTTGCCACCGATGATTTTCATCGCTCAAAG  
TATCCAGTGGCTGCAGACGCACAGCAATGCCTATGATGTCTCAATGCTGTATGTCAGCGATCATGGCGAAAGTCTGGGTG  
AGAACGGTGTCTATCTACATGGTATGCCAAATGCCTTTGCACCAAAGAAGAACAGCGCAGTGTGCCTGCATTTTTCTGGACG  
GATAAGCAAACCTGGCATCACGCCAATGGCAACCGATACCGTCCTGACCCATGACGCGATCACGCCGACATTATTAAAGCT  
GTTTGATGTCACCGCGGACAAAGTCAAAGACCGCACCGCATTTCATCCGCTGATTTCTCCCTGTATTTTTTCCAAACCCAC  
CGCACACTCCATTTCGTATTATGGGCGGTGGGGTGGGGTTTGTTATGCCGTATTTATCAAATAAACGCCTACTTGCTGAGA  
TGAGTATCGCTCTTGTCATGGCGATCGTTGCCACGCTGACCCTTGAGCACAGTCAGATTGATCTGATGGTCGCTGATTGG  
TTTTATCTGGGTATGGGGCATTGGATGGTTGCCAAGCAAGCTTTTTTGCCAGATTGCTACTGTATTCTGGACTAAAAAA  
GCTGCTGATGGCGATGCTGATCTACTTGCTGGTTGCGACCATTTGCCGTGCTTATCATGAGAAAAAGGGCAATGCTATCA  
CTGCCAAGTGGCTTGTCAGTGACAAAATTTGCGGTGCGTGAGCTTGCGTATCTGGTGCTGACTTTGATCCTAGTGCCG  
ACAGTTGTCGCGTCATTGAAGGCATATACTCATGTGGTCTGCCCTGTGCATTTGACGATTTTTGATGGTACGCTGCCGTA  
TTTGCCGATGCTTGATAGTATGCGTAACACCATTCTGATAAGTGCTTTCCTGCGGCGCATGCCAGTAGCGGATTTGCGC  
TGTTTGCCTTTGCGTTTGCGCCAAGTTTGCGCCGCCGTCGTGGTGCGATCATCATCGTGGTGATGGCATTGGGCTGGGCG  
ATGGGCTGCTATAAGATGATTATTGGCGATCATTTTTTGAGCCATACGGTGGTGTCGATGATGCTTGCGTGGGCGATGTC  
GGCAGGGCTTGCGTGGGTGTTTTTTAAGAAGGGTGAACAAGTTTAATCGGCTGAATTTACAATCCAAGTGCAACAAAAAA  
AGAAGTACTCATCAACTAGAAATATAATTTGTTTCCACACAAAAACCACTTCCAAATGATGAGTACTTCCTACCGACATC  
TTACAATAAACGAGCGAGAAAAGATAATGATTTTACTCGCACAGGGCAAAAAACAAGCAGAAATTGCCAAAGCACTGGGA  
CGTAGCTCCAGCACCATTTCTCGCGAGCTGAAACGACACGCTCTAGGGAAGGTGCGAACAAGTTCCTGATATGAGATCAT

CATATTCATCCGGAGCGCATCCCAGAGGGACATCATGAGCCATCAACTCACCTTCGCCGATAGTGAATTCAGCACTAAGC  
GCCGTCAGACCCGAAAAGAGATTTTCCTCTCCCGCATGGAGCAGATTTTGCCATGGCAGAATATGACCGCTGTCATCGAG  
CCGTTTTATCCCAAGGCGGGCAATGGCCGACGGCCCTATCCGCTGGAGACCATGCTGCGTATTCACTGCATGCAGCATTG  
GTACAACCTGAGCGACGGTGCCATGGAAGATGCCCTGTACGAAATCGCCTCCATGCGCCTGTTTGCCCGATTATCCCTGG  
ATAGCGCCCTGCCGGATCGCACCACCATCATGAATTTCCGCCACCTGCTCGAGCAGCATCAACTGGCCCGTCAATTGTTC  
AAGACCATCAATCGCTGGCTGGCCGAAGCAGGCGTCATGATGACCCAAGGCACTTTGGTGGATGCCACCATCATTGAGGC  
ACCCAGCTCTACCAAGAACAAAGAGCAGCAACGCGATCCGGAGATGCATCAGACCAAGAAAGGCAATCAGTGGCACTTTG  
GCATGAAGGCCACATTGGTGTGATGCCAAGAGTGGCCTGACCCACAGCCTGGTCACCACCGCGGCCAACGAGCATGAC  
CTCAATCAGCTGGGTAATCTGCTTCATGGAGAGGAGCAATTTGTCTCAGCCGATGCCGGCTACCAAGGAGCGCCACAGCG  
CGAGGAGCTGGCCGAGGTGGATGTGGACTGGCTGATCGCCGAGCGTCCCGGCAGGGTAAAAACCTTGAAGCAGCATCCGC  
GCAAGAACAAAACGGCCATCAACATCGAATACATGAAAGCCAGCATCCGTGCCAGGGTGGAGCACCCGTTTCGCATCATC  
AAGCGGCAGTTCGGCTTCGTGAAAGCCAGATACAAGGGGCTGCTGAAAAACGATAACCAACTGGCGATGTTATTCACCCT  
GGCCAACCTGTTTCGGGTGGACCAAATGATACGTCAGTGGGAGAGATCTCAGTAAAAACCGGAAATAACGCCAGAAATGG  
TGGA AAAAATAGCCTAAATAGGCTGATTCGATGTGTTTGCGGGAAAAAAATCGGCCCAGATCCGCGAAATTTTAATCAGC  
GAGTCAGCTTGGGAAGAAATGACCTGCTTATTCGCACCTTCCCTAGAAAGCTACAGTGCAACGAACGCACAAAACAGCTA  
TTTGAAGCATCGTCAAAATAGCAAAGCACAGCGCAAATTAGAGCAGCCTGAATATTTCAATTTGGTGCAAGAAAAGTTTC  
TGACAGAAAACCTGGTCGCCCCGAACAAATCAGCGCACGATTAAAATTGGA AAAATCTGAATTATCCATTAGTTATTCAACC  
ATTTATCGTGGTATTTATTCAGGGTTGTTTGATATAGGCGAACGCAAAGCCAGTCGCAAACCTGCGCCACAAAGGCAAAAC  
ACGGCATACAAAAAATCATCATGAAAAACGTGGCAA AATTCAGATATCCAACCATTTGAACGACCGTCCCATTTCGGCGC

AAAATCGCAGTCGCTTTGGACATTGGGAAGCCGATACCGTACTGGGTAAAGCGGGTGGAGCTTGTTTGCTGACGCTGACG  
GAACGCAAAAGTCGTTTTGAGTTGGTGAAGAAAATTCTTGCCAAAAAAGCCGAAGCAGTCCAAAAAGCCATGATTGAATT  
GCTGGATTCACATATATTGCGGTCAATTACGCCAGACCGTGGTAAAGAATTTGCCCAACATCGTTTGGTAACAGAAGCAC  
TGGGTGTAGAATTTTACTTCCCCGAGCCGCATCAACCGTGGACACGGGGAACGAATGAAAATACAAATGGGTTACTTCGT  
GAATACTTTCCGAAGCACCAAGACATCAATCAGTGGAGCGAAGTTGATATTCAACAGGTGATCAATAAACTGAATTTACG  
ACCACGTAAATGTTTAGGTTGGAAAACACCTTATGAAGTTTACTTCAAAAAATCGTTGCACTTGGTTTGACAATTCAAGA  
GACTAAAAGAGAAGGGAGTGAAAATGGAAGTGGGCATTATGGTGTGCATCGTGTTGTTACTCTCCGTGGCGGCGGCGTGG  
ATCAGTAATAAGACAGTTGATTTGCTCGAAAGATTCTATTTCAAGCGTCCGCTGAGCATGGAGTACGCGGCATGGCTACG  
TGTAATGTGTGCAGGCTTGTTATTGGTTTTTATTCAGGTGCTCCACAATTTACACTTCTGTATACCCTTAACTTGTC  
CGCTTATTAATCTTGGAATCCAGACAATGAAATTAAATGGCGTGTACAAATATAAAAGAACGG

>NG\_050417.1 Escherichia coli SHP45 pHNSHP45 mcr-1 gene for phosphoethanolamine--lipid A transferase MCR-1.1, complete CDS

CGCATAATTTTTTATATCAGATAAATTGTACTGGATTTCTTAAAAAATTGCAGTATAATTGCCGTAATTATCCCACCGTT  
TATTTTTTGAGTAGTTTCTCATGATGCAGCATACTTCTGTGTGGTACCGACGCTCGGTCAGTCCGTTTGTTCCTGTGGCG  
AGTGTTGCCGTTTTCTTGACCGCGACCGCCAATCTTACCTTTTTTGATAAAAATCAGCCAAACCTATCCCATCGCGGACAA  
TCTCGGCTTTGTGCTGACGATCGCTGTCGTGCTCTTTGGCGCGATGCTACTGATCACCACGCTGTTATCATCGTATCGCT  
ATGTGCTAAAGCCTGTGTTGATTTTGCTATTAATCATGGGCGCGGTGACCAGTTATTTTACTGACACTTATGGCACGGTC  
TATGATACGACCATGCTCCAAAATGCCCTACAGACCGACCAAGCCGAGACCAAGGATCTATTAAACGCAGCGTTTATCAT  
GCGTATCATTGGTTTGGGTGTGCTACCAAGTTTGCTTGTGGCTTTTGTAAAGGTGGATTATCCGACTTGGGGCAAGGGTT  
TGATGCGCCGATTGGGCTTGATCGTGGCAAGTCTTGCGCTGATTTTACTGCCTGTGGTGGCGTTCAGCAGTCATTATGCC

AGTTTCTTTCGCGTGCATAAGCCGCTGCGTAGCTATGTCAATCCGATCATGCCAATCTACTCGGTGGGTAAGCTTGCCAG  
TATTGAGTATAAAAAAGCCAGTGCGCCAAAAGATACCATTTATCACGCCAAAGACGCGGTACAAGCAACCAAGCCTGATA  
TGCGTAAGCCACGCCTAGTGGTGTTCGTCGTCGGTGAGACGGCACGCGCCGATCATGTCAGCTTCAATGGCTATGAGCGC  
GATACTTTCCACAGCTTGCCAAGATCGATGGCGTGACCAATTTTAGCAATGTCACATCGTGCGGCACATCGACGGCGTA  
TTCTGTGCCGTGTATGTTTCAGCTATCTGGGCGCGGATGAGTATGATGTCGATACCGCCAAATACCAAGAAAATGTGCTGG  
ATACGCTGGATCGCTTGGGCGTAAGTATCTTGTGGCGTGATAATAATTCGGACTCAAAGGCGTGATGGATAAGCTGCCA  
AAAGCGCAATTTGCCGATTATAAATCCGCGACCAACAACGCCATCTGCAACACCAATCCTTATAACGAATGCCGCGATGT  
CGGTATGCTCGTTGGCTTAGATGACTTTGTGCGTGCCAATAACGGCAAAGATATGCTGATCATGCTGCACCAAATGGGCA  
ATCACGGGCCTGCGTATTTTAAGCGATATGATGAAAAGTTTGCCAAATTCACGCCAGTGTGTGAAGGTAATGAGCTTGCC  
AAGTGCGAACATCAGTCCTTGATCAATGCTTATGACAATGCCTTGCTTGCCACCGATGATTTTCATCGCTCAAAGTATCCA  
GTGGCTGCAGACGCACAGCAATGCCTATGATGTCTCAATGCTGTATGTCAGCGATCATGGCGAAAGTCTGGGTGAGAACG  
GTGTCTATCTACATGGTATGCCAAATGCCTTTGCACCAAAAGAACAGCGCAGTGTGCCTGCATTTTTCTGGACGGATAAG  
CAAACCTGGCATCACGCCAATGGCAACCGATACCGTCCTGACCCATGACGCGATCACGCCGACATTATTAAAGCTGTTTGA  
TGTCACCGCGGACAAAGTCAAAGACCGCACCGCATTTCATCCGCTGATTTCTCCCTGTATTTTTTCCAAACCCACCGCACA  
CTCCATTTCGTATTATGGGCGGTGGGGTGGGGTTTGTATGCCGTATTTATCAAATAAACGCCTACT

>LC114017.1 *Escherichia coli* mcr-1 gene for phosphoethanolamine-lipid A transferase MCR-1, complete cds, strain: M165

ATGATGCAGCATACTTCTGTGTGGTACCGACGCTCGGTCAGTCCGTTTGTTCCTTGTGGCGAGTGTTGCCGTTTTCTTGAC  
CGCGACCGCCAATCTTACCTTTTTTGATAAAATCAGCCAAACCTATCCCATCGCGGACAATCTCGGCTTTGTGCTGACGA  
TCGCTGTCGTGCTCTTTGGCGCGATGCTACTGATCACCACGCTGTTATCATCGTATCGCTATGTGCTAAAGCCTGTGTTG

ATTTTGCTATTAATCATGGGCGCGGTGACCAGTTATTTTACTGACACTTATGGCACGGTCTATGATACGACCATGCTCCA  
AAATGCCCTACAGACCGACCAAGCCGAGACCAAGGATCTATTAAACGCAGCGTTTATCATGCGTATCATTGGTTTGGGTG  
TGCTACCAAGTTTGCTTGTGGCTTTTGTTAAGGTGGATTATCCGACTTGGGGCAAGGGTTTGATGCGCCGATTGGGCTTG  
ATCGTGGCAAGTCTTGCGCTGATTTTACTGCCTGTGGTGGCGTTCAGCAGTCATTATGCCAGTTTCTTTCGCGTGCATAA  
GCCGCTGCGTAGCTATGTCAATCCGATCATGCCAATCTACTCGGTGGGTAAAGCTTGCCAGTATTGAGTATAAAAAAGCCA  
GTGCGCCAAAAGATACCATTTATCACGCCAAAGACGCGGTACAAGCAACCAAGCCTGATATGCGTAAGCCACGCCTAGTG  
GTGTTTCGTCGTCGGTGAGACGGCACGCGCCGATCATGTCAGCTTCAATGGCTATGAGCGCGATACTTTCCACAGCTTGC  
CAAGATCGATGGCGTGACCAATTTTAGCAATGTCACATCGTGCGGCACATCGACGGCGTATTCTGTGCCGTGTATGTTCA  
GCTATCTGGGCGCGGATGAGTATGATGTCGATACCGCCAAATACCAAGAAAATGTGCTGGATACGCTGGATCGCTTGGGC  
GTAAGTATCTTGTGGCGTGATAATAATTCGGA CTCAAAGGCGTGATGGATAAGCTGCCAAAAGCGCAATTTGCCGATTA  
TAAATCCGCGACCAACAACGCCATCTGCAACACCAATCCTTATAACGAATGCCGCGATGTCGGTATGCTCGTTGGCTTAG  
ATGACTTTGTCGCTGCCAATAACGGCAAAGATATGCTGATCATGCTGCACCAAATGGGCAATCACGGGCCTGCGTATTTT  
AAGCGATATGATGAAAAGTTTGCCAAATTCACGCCAGTGTGTGAAGGTAATGAGCTTGCCAAGTGCGAACATCAGTCCTT  
GATCAATGCTTATGACAATGCCTTGCTTGCCACCGATGATTTTCATCGCTCAAAGTATCCAGTGGCTGCAGACGCACAGCA  
ATGCCTATGATGTCTCAATGCTGTATGTCAGCGATCATGGCGAAAGTCTGGGTGAGAACGGTGTCTATCTACATGGTATG  
CCAAATGCCTTTGCACCAAAAGAACAGCGCAGTGTGCCTGCATTTTTCTGGACGGATAAGCAA ACTGGCATCACGCCAAT  
GGCAACCGATACCGTCCTGACCCATGACGCGATCACGCCGACATTATTAAAGCTGTTTGATGTCACCGCGGACAAAGTCA  
AAGACCGCACCGCATTTCATCCGCTGA

>NG\_068217.1 Escherichia coli 803\_18 mcr-1 gene for phosphoethanolamine--lipid A transferase MCR-1.26, complete CDS

ATAATTTTTATATCAGATAAATTGTACTGGATTTCTTAAAAAATTGCAGTATAATTGCCGCAATTATCCCACCGTTTAT  
TTTTTGAGTAGTTTCTCACGATGCAGCATACTTCTGTGTGGTACCGACGCTCGGTGAGTCCGTTTGTTCCTTGTGGCGAGT  
GTTGCCGTTTTCTTGACCGCGACCGCCAATCTTACCTTTTTTGATAAAATCAGCCAAACCTATCCCATCGCGGACAATCT  
CGGCTTTGTGCTGACGATCGCTGTCGTGCTCTTTGGCGCGATGCTACTGATCACCACGCTGTTATCATCGTATCGCTATG  
TGCTAAAGCCTGTGTTGATTTTGCTATTAATCATGGGCGCGGTGACCAGTTATTTTACTGACACTTATGGCACGGTCTAT  
GATACGACCATGCTCCAAAATGCCCTACAGACCGACCAAGCCGAGACCAAGGATCTATTAAACGCAGCGTTTATCATGCG  
TATCATTGGTTTGGGTGTGCTACCAAGTTTGCTTGTGGCTTTTGTTAAGGTGGATTATCCGACTTGGGGCAAGGGTTTGA  
TGCGCCGATTGGGCTTGATCGTGGCAAGTCTTGCGCTGATTTTACTGCCTGTGGTGGCGTTCAGCAGTCATTATGCCAGT  
TTCTTTCGCGTGCATAAGCCGCTGCGTAGCTATGTCAATCCGATCATGCCAATCTACTCGGTGGGTAAGCTTGCCAGTAT  
TGAGTATAAAAAAGCCAGTGCGCCAAAAGATACCATTTATCACGCCAAAGACGCGGTACAAGCAACCAAGCCTGATATGC  
GTAAGCCACGCCTAGTGGTGTTCGTGTCGGTGAGACGGCACGCGCCGATCATGTCAGCTTCAATGGCTATGAGCGCGAT  
ACTTTCCACAGCTTGCCAAGATCGATGGCGTGACCAATTTTAGCAATGTCACATCGTGCGGCACATCGACGGCGTATTC  
TGTGCCGTGTATGTTTACGCTATCTGGGCGCGGATGAGTATGATGTCGATACCGCCAAATACCAAGAAAATGTGCTGGATA  
CGCTGGATCGCTTGGGCGTAAGTATCTTGTGGCGTGATAATAATTCGGACTCAAAGGCGTGATGGATAAGCTGCCAAAA  
GCGCAATTTGCCGATTATAAATCCGCGACCAACAACGCCATCTGCAACACCAATCCTTATAACGAATGCCGCGATGTCGG  
TATGCTCGTTGGCTTAGATGACTTTGTGCTGCCAATAACGGCAAAGATATGCTGATCATGCTGCACCAAATGGGCAATC  
ACGGGCCTGCGTATTTAAGCGATATGATGAAAAGTTTGCCAAATTCACGCCAGTGTGTGAAGGTAATGAGCTTGCCAAG  
TGCGAACATCAGTCCTTGATCAATGCTTATGACAATGCCTTGCTTGCCACCGATGATTCATCGCTCAAAGTATCCAGTG  
GCTGCAGACGCACAGCAATGCCTATGATGTCTCAATGCTGTATGTCAGCGATCATGGCGAAAGTCTGGGTGAGAACGGTG



TCTATCTACATGGTATGCCAAATGCCTTTGCACCAAAAGAACAGCGCAGTGTGCCTGCATTTTTCTGGACGGATAAGCAA  
ACTGGCATCACGCCAATGGCAACCGATACCGTCCTGACCCATGACGCGATCACGCCGACATTATTAAAGCTGTTTGATGT  
CACCGCGGACAAAGTCAAAGACCGCACCGCATTCATCCGCTGATTTCTCCCTGTATTTTTTCCAAACCCACCGCACACTC  
CATTCGTATTATGGGCGGTGGGGTGGGGTTTGTTATGCCGTATTTATCAAATAAACGCCTACT

>MN879258.1 Escherichia coli strain SAUVM\_E5 MCR-1 family phosphoethanolamine--lipid A transferase (mcr-1) gene, partial cds

ATGATGCAGCATACTTCTGTGTGGTACCGACGCTCGGTTCAGTCCGTTTGTTCTTGTGGCGAGTGTTGCCGTTTTCTTGAC  
CGCGACCGCCAATCTTACCTTTTTTGATAAAATCAGCCAAACCTATCCCATCGCGGACAATCTCGGCTTTGTGCTGACGA  
TCGCTGTCGTGCTCTTTGGCGCGATGCTACTGATCACCACGCTGTTATCATCGTATCGCTATGTGCTAAAGCCTGTGTTG  
ATTTTGCTATTAATCATGGGCGCGGTGACCAGTTATTTTACTGACACTTATGGCACGGTCTATGATACGACCATGCTCCA  
AAATGCCCTACAGACCGACCAAGCCGAGACCAAGGATCTATTAAACGCAGCGTTTATCATGCGTATCATTGGTTTGGGTG  
TGCTACCAAGTTTGCTTGTGGCTTTTGTTAAGGTGGATTATCCGACTTGGGGCAAGGGTTTGATGCGCCGATTGGGCTTG  
ATCGTGGCAAGTCTTGCGCTGATTTTACTGCCTGTGGTGGCGTTCAGCAGTCATTATGCCAGTTTCTTTTCGCGTGCATAA  
GCCGCTGCGTAGCTATGTCAATCCGATCATGCCAATCTACTCGGTGGGTAAGCTTGCCAGTATTGAGTATAAAAAAGCCA  
GTGCGCCAAAAGATACCATTTATCACGCCAAAGACGCGGTACAAGCAACCAAGCCTGATATGCGTAAGCCACGCCTAGTG  
GTGTTTCGTGTCGGTGAGACGGCACGCGCCGATCATGTCAGCTTCAATGGCTATGAGCGCGATACTTTCCACAGCTTGC  
CAAGATCGATGGCGTGACCAATTTTAGCAATGTCACATCGTGCGGCACATCGACGGCGTATTCTGTGCCGTGTATGTTCA  
GCTATCTGGGCGCGGATGAGTATGATGTGATACCGCCAAATACCAAGAAAATGTGCTGGATACGCTGGATCGCTTGGGC  
GTAAGTATCTTGTGGCGTGATAATAATTCGGACTCAAAGGCGTGATGGATAAGCTGCCAAAAGCGCAATTTGCCGATTA  
TAAATCCGCGACCAACAACGCCATCTGCAACACCAATCCTTATAACGAATGCCGCGATGTCCGTATGCTCGTTGGCTTAG

ATGACTTTGTCGCTGCCAATAACGGCAAAGATATGCTGATCATGCTGCACCAAATGGGCAATCACGGGCCTGCGTATTTT  
AAGCGATATGATGAAAAGTTTGCCAAATTCACGCCAGTGTGTGAAGGTAATGAGCTTGCCAAGTGCGAACATCAGTCCTT  
GATCAATGCTTATGACAATGCCTTGCTTGCCACCGATGATTTTCATCGCTCAAAGTATCCAGTGGCTGCAGACGCACAGCA  
ATGCCTATGATGTCTCAATGCTGTATGTCAGCGATCATGGCGAAAGTCTGGGTGAGAACGGTGTCTATCTACATGGTATG  
CCAAATGCCTTTGCACCAAAAGAACAGCGCAGTGTGCCTGCATTTTTCTGGACGGATAAGCAAACCTGGCATCACGCCAAT  
GGCAACCGATACCGTCCTGACCCATGACGCGATCACGCCGACATTATTAAAGCTGTTTGATGTCACCGCGGACAAAGTCA  
AAGACCGCACCGCATNCATCCGCTGA

>KY685070.1 Escherichia coli strain HKSH\_MCR\_161103180\_EC phosphoethanolamine lipid A transferase (mcr1) gene, mcr1.8 allele, complete cds

ATGATGCAGCATACTTCTGTGTGGTACCGACGCTCGGTCAGTCCGTTTGTTCTTGTGGCGAGTGTTGCCGTTTTCTTGAC  
CGCGACCGCCAATCTTACCTTTTTTGATAAAATCAGCCAAACCTATCCCATCGCGGACAATCTCGGCTTTGTGCTGACGA  
TCGCTGTCGTGCTCTTTGGCGCGATGCTACTGATCACCACGCTGTTATCATCGTATCGCTATGTGCTAAAGCCTGTGTTG  
ATTTTGCTATTAATCATGGGCGCGGTGACCAGTTATTTTACTGACACTTATGGCACGGTCTATGATACGACCATGCTCCA  
AAATGCCCTACAGACCGACCAAGCCGAGACCAAGGATCTATTAAACGCAGCGTTTATCATGCGTATCATTGGTTTGGGTG  
TGCTACCAAGTTTGCTTGTGGCTTTTGTTAAGGTGGATTATCCGACTTGGGGCAAGGGTTTGATGCGCCGATTGGGCTTG  
ATCGTGGCAAGTCTTGCGCTGATTTTACTGCCTGTGGTGGCGTTCAGCAGTCATTATGCCAGTTTCTTTCGCGTGCATAA  
GCCGCTGCGTAGCTATGTCAATCCGATCATGCCAATCTACTCGGTGGGTAAGCTTGCCAGTATTGAGTATAAAAAAGCCA  
GTGCGCCAAAAGATAACCATTTATCACGCCAAAGACGCGGTACAAGCAACCAAGCCTGATATGCGTAAGCCACGCCTAGTG  
GTGTTTCGTCGTGCGTGAGACGGCACGCGCCGATCATGTCAGCTTCAATGGCTATGAGCGCGATACTTTCCACAGCTTGC  
CAAGATCGATGGCGTGACCAATTTTAGCAATGTCACATCGTGCGGCACATCGACGGCGTATTCTGTGCCGTGTATGTTCA

GCTATCTGGGCGCGGATGAGTATGATGTGCGATACCGCCAAATACCAAGAAAATGTGCTGGATACGCTGGATCGCTTGGGC  
GTAAGTATCTTGTGGCGTGATAATAATTCGGACTCAAAAGGCGTGATGGATAAGCTGCCAAAAGCGCAATTTGCCGATTA  
TAAATCCGCGACCAACAACGCCATCTGCAACACCAATCCTTATAACGAATGCCGCGATGTCCGGTATGCTCGTTGGCTTAG  
ATGACTTTGTGCTGCCAATAACGGCAAAGATATGCTGATCATGCTGCACCAAATGGGCAATCACGGGCCTGCGTATTTT  
AAGCGATATGATGAAAAGTTTGCCAAATTCACGCCAGTGTGTGAAGGTAATGAGCTTGCCAARTGCGAACATCAGTCCTT  
GATCAATGCTTATGACAATGCCTTGCTTGCCACCGATGATTTTCATCGCTCAAAGTATCCAGTGGCTGCAGACGCACAGCA  
ATGCCTATGATGTCTCAATGCTGTATGTCAGCGATCATGGCGAAAGTCTGGGTGAGAACGGTGTCTATCTACATGGTATG  
CCAAATGCCTTTGCACCAAAAGAACAGCGCAGTGTGCCTGCATTTTTCTGGACGGATAAGCAAACCTGGCATCACGCCAAT  
GGCAACCGATACCGTCCTGACCCATGACGCGATCACGCCGACATTATTAAAGCTGTTTGATGTCACCGCGGACAAAGTCA  
AAGACCGCACCGCATTTCATCCGCTGA

>NG\_068218.1 Escherichia coli 844\_18 mcr-1 gene for phosphoethanolamine--lipid A transferase MCR-1.27, complete CDS

CGCATAATTTTTTATATCAGATAAATTGTACTGGATTTCTTAAAAAATTGCAGTATAATTGCCGCAATTATCCCACCGTT  
TATTTTTTGAGTAGTTTCTCATGATGCAGCATACTTCTGTGTGGTGCCGACGCTCGGTCAGTCCGTTTGTTCTTGTGGCG  
AGTGTTGCCGTTTTCTTGACCGCGACCGCCAATCTTACCTTTTTTGATAAAATCAGCCAAACCTATCCCATCGCGGACAA  
TCTCGGCTTTGTGCTGACGATCGCTGTCGTGCTCTTTGGCGCGATGCTACTGATCACCACGCTGTTATCATCGTATCGCT  
ATGTGCTAAAGCCTGTGTTGATTTTGCTATTAATCATGGGCGCGGTGACCAGTTATTTTACTGACACTTATGGCACGGTC  
TATGATACGACCATGCTCCAAAATGCCCTACAGACCGACCAAGCCGAGACCAAGGATCTATTAAACGCAGCGTTTATCAT  
GCGTATCATTGGTTTGGGTGTGCTACCAAGTTTGCTTGTGGCTTTTGTAAAGGTGGATTATCCGACTTGGGGCAAGGGTT  
TGATGCGCCGATTGGGCTTGATCGTGGCAAGTCTTGCGCTGATTTTACTGCCTGTGGTGGCGTTCAGCAGTCATTATGCC

AGTTTCTTTCGCGTGCATAAGCCGCTGCGTAGCTATGTCAATCCGATCATGCCAATCTACTCGGTGGGTAAGCTTGCCAG  
TATTGAGTATAAAAAAGCCAGTGCGCCAAAAGATACCATTTATCACGCCAAAGACGCGGTACAAGCAACCAAGCCTGATA  
TGCGTAAGCCACGCCTAGTGGTGTTCGTCGTCGGTGAGACGGCACGCGCCGATCATGTCAGCTTCAATGGCTATGAGCGC  
GATACTTTCCACAGCTTGCCAAGATCGATGGCGTGACCAATTTTAGCAATGTCACATCGTGCGGCACATCGACGGCGTA  
TTCTGTGCCGTGTATGTTTCAGCTATCTGGGCGCGGATGAGTATGATGTCGATACCGCCAAATACCAAGAAAATGTGCTGG  
ATACGCTGGATCGCTTGGGCGTAAGTATCTTGTGGCGTGATAATAATTCGGACTCAAAGGCGTGATGGATAAGCTGCCA  
AAAGCGCAATTTGCCGATTATAAATCCGCGACCAACAACGCCATCTGCAACACCAATCCTTATAACGAATGCCGCGATGT  
CGGTATGCTCGTTGGCTTAGATGACTTTGTGCGTGCCAATAACGGCAAAGATATGCTGATCATGCTGCACCAAATGGGCA  
ATCACGGGCCTGCGTATTTTAAGCGATATGATGAAAAGTTTGCCAAATTCACGCCAGTGTGTGAAGGTAATGAGCTTGCC  
AAGTGCGAACATCAGTCCTTGATCAATGCTTATGACAATGCCTTGCTTGCCACCGATGATTTTCATCGCTCAAAGTATCCA  
GTGGCTGCAGACGCACAGCAATGCCTATGATGTCTCAATGCTGTATGTCAGCGATCATGGCGAAAGTCTGGGTGAGAACG  
GTGTCTATCTACATGGTATGCCAAATGCCTTTGCACCAAAAGAACAGCGCAGTGTGCCTGCATTTTTCTGGACGGATAAG  
CAAACCTGGCATCACGCCAATGGCAACCGATACCGTCCTGACCCATGACGCGATCACGCCGACATTATTAAAGCTGTTTGA  
TGTCACCGCGGACAAAGTCAAAGACCGCACCGCATTTCATCCGCTGATTTCTCCCTGTATTTTTTCCAAACCCACCGCACA  
CTCCATTTCGTATTATGGGCGGTGGGGTGGGGTTTGTATGCCGTATTTATCAAATAAACGCCTACT

>NG\_065944.1 Escherichia coli NIG-EC49 mcr-1 gene for phosphoethanolamine--lipid A transferase MCR-1.22, complete CDS

ATGATGCAGCATACTTCTGTGTGGTACCGACGCTCGGTCAGTCCGTTTGTCTTGTGGCGAGTGTTGCCGTTTTCTTGAC  
CGCGACCGCCAATCTTACCTTTTTTGATAAAATCAGCCAAACCTATCCCATCGCGGACAATCTCGGCTTTGTGCTGACGA  
TCGCTGTCGTGCTCTTTGGCGCGATGCTACTGATCACCACGCTGTTATCATCGTATCGCTATGTGCTAAAGCCTGTGTTG

ATTTTGCTATTAATCATGGGCGCGGTGACCAGTTATTTTACTGACACTTATGGCACGGTCTATGATACGACCATGCTCCA  
AAATGCCCTACAGACCGACCAAGCCGAGACCAAGGATCTATTAAACGCAGCGTTTATCATGCGTATCATTGGTTTGGGTG  
TGCTACCAAGTTTGCTTGTGGCTTTTGTTAAGGTGGATTATCCGACTTGGGGCAAGGGTTTGATGCGCCGATTGGGCTTG  
ATCGTGGCAAGTCTTGCGCTGATTTTACTGCCTGTGGTGGCGTTCAGCAGTCATTATGCCAGTTTCTTTCGCGTGCATAA  
GCCGCTGCGTAGCTATGTCAATCCGATCATGCCAATCTACTCGGTGGGTAAAGCTTGCCAGTATTGAGTATAAAAAAGCCA  
GTGCGCCAAAAGATACCATTTATCACGCCAAAGACGCGGTACAAGCAACCAAGCCTGATATGCGTAAGCCACGCCTAGTG  
GTGTTTCGTCGTCGGTGAGACGGCACGCGCCGATCATGTCAGCTTCAATGGCTATGAGCGCGATACTTTCCACAGCTTGC  
CAAGATCGATGGCGTGACCAATTTTAGCAATGTCACATCGTGCGGCACATCGACGGCGTATTCTGTGCCGTGTATGTTCA  
GCTATCTGGGCGCGGATGAGTATGATGTCGATACCGCCAAATACCAAGAAAATGTGCTGGATACGCTGGATCGCTTGGGC  
GTAAGTATCTTGTGGCGTGATAATAATTCGGA CTCAAAGGCGTGATGGATAAGCTGCCAAAAGCGCAATTTGCCGATTA  
TAAATCCGCGACCAACAACGCCATCTGCAACACCAATCCTTATAACGAATGCCGCGATGTCGGTATGCTCGTTGGCTTAG  
ATGACTTTGTCGCTGCCAATAACGGCAAAGATATGCTGATCATGCTGCACCAAATGGGCAATCACGGGCCTGCGTATTTT  
AAGCGATATGATGAAAAGTTTGCCAAATTCACGCCAGTGTGTGAAGGTAATGAGCTTGCCAAGTGCGAACATCAGTTCTT  
GATCAATGCTTATGACAATGCCTTGCTTGCCACCGATGATTTTCATCGCTCAAAGTATCCAGTGGCTGCAGACGCACAGCA  
ATGCCTATGATGTCTCAATGCTGTATGTCAGCGATCATGGCGAAAGTCTGGGTGAGAACGGTGTCTATCTACATGGTATG  
CCAAATGCCTTTGCACCAAAAAGAACAGCGCAGTGTGCCTGCATTTTTCTGGACGGATAAGCAA ACTGGCATCACGCCAAT  
GGCAACCGATACCGTCCTGACCCATGACGCGATCACGCCGACATTATTAAAGCTGTTTGATGTCACCGCGGACAAAGTCA  
AAGACCGCACCGCATTTCATCCGCTGA

>MN017134.1 Escherichia coli strain NIG-EC49 phosphoethanolamine--lipid A transferase MCR-1.22 (mcr-1) gene, mcr-1.22 allele, complete cds

ATGATGCAGCATACTTCTGTGTGGTACCGACGCTCGGTCACTCCGTTTGTTCCTGTGGCGAGTGTTGCCGTTTTCTTGAC  
CGCGACCGCCAATCTTACCTTTTTTTGATAAAATCAGCCAAACCTATCCCATCGCGGACAATCTCGGCTTTGTGCTGACGA  
TCGCTGTCGTGCTCTTTGGCGCGATGCTACTGATCACCACGCTGTTATCATCGTATCGCTATGTGCTAAAGCCTGTGTTG  
ATTTTGCTATTAATCATGGGCGCGGTGACCAGTTATTTTACTGACACTTATGGCACGGTCTATGATACGACCATGCTCCA  
AAATGCCCTACAGACCGACCAAGCCGAGACCAAGGATCTATTAACGCAGCGTTTATCATGCGTATCATTGGTTTGGGTG  
TGCTACCAAGTTTGCTTGTGGCTTTTGTAAAGGTGGATTATCCGACTTGGGGCAAGGGTTTGATGCGCCGATTGGGCTTG  
ATCGTGGCAAGTCTTGCGCTGATTTTACTGCCTGTGGTGGCGTTCAGCAGTCATTATGCCAGTTTCTTTCGCGTGCATAA  
GCCGCTGCGTAGCTATGTCAATCCGATCATGCCAATCTACTCGGTGGGTAAAGCTTGCCAGTATTGAGTATAAAAAAGCCA  
GTGCGCCAAAAGATACCATTTATCACGCCAAAGACGCGGTACAAGCAACCAAGCCTGATATGCGTAAGCCACGCCTAGTG  
GTGTTTCGTCGTCGGTGAGACGGCACGCGCCGATCATGTCAGCTTCAATGGCTATGAGCGCGATACTTTCCACAGCTTGC  
CAAGATCGATGGCGTGACCAATTTTAGCAATGTCACATCGTGCGGCACATCGACGGCGTATTCTGTGCCGTGTATGTTCA  
GCTATCTGGGCGCGGATGAGTATGATGTCGATACCGCCAAATACCAAGAAAATGTGCTGGATACGCTGGATCGCTTGGGC  
GTAAGTATCTTGTGGCGTGATAATAATTCGGACTCAAAGGCGTGATGGATAAGCTGCCAAAAGCGCAATTTGCCGATTA  
TAAATCCGCGACCAACAACGCCATCTGCAACACCAATCCTTATAACGAATGCCGCGATGTCGGTATGCTCGTTGGCTTAG  
ATGACTTTGTGCTGCCAATAACGGCAAAGATATGCTGATCATGCTGCACCAAATGGGCAATCACGGGCCTGCGTATTTT  
AAGCGATATGATGAAAAGTTTGCCAAATTCACGCCAGTGTGTGAAGGTAATGAGCTTGCCAAGTGCGAACATCAGTTCTT  
GATCAATGCTTATGACAATGCCTTGCTTGCCACCGATGATTTTCATCGCTCAAAGTATCCAGTGGCTGCAGACGCACAGCA  
ATGCCTATGATGTCTCAATGCTGTATGTCAGCGATCATGGCGAAAGTCTGGGTGAGAACGGTGTCTATCTACATGGTATG  
CCAAATGCCTTTGCACCAAAAGAACAGCGCAGTGTGCCTGCATTTTTCTGGACGGATAAGCAAACCTGGCATCACGCCAAT

GGCAACCGATACCGTCCTGACCCATGACGCGATCACGCCGACATTATTAAAGCTGTTTGATGTCACCGCGGACAAAGTCA  
AAGACCGCACCGCATTTCATCCGCTGA

>NG\_065451.1 Escherichia coli QHYN2016-F200 mcr-1 gene for phosphoethanolamine--lipid A transferase MCR-1.21, complete CDS

ATGATGCAGCATACTTCTGTGTGGTACCGACGCTCGGTCAGTCCGTTTGTTCTTGTGGCGAGTGTTGCCGTTTTCTTGAC  
CGCGACCGCCAATCTTACCTTTTTTGATAAAATCAGCCAAACCTATCCCATCGCGGACAATCTCGGCTTTGTGCTGACGA  
TCGCTGTCGTGCTCTTTGGCGCGATGCTACTGATCACCACGCTGTTATCATCGTATCGCTATGTGCTAAAGCCTGTGTTG  
ATTTTGCTATTAATCATGGGCGCGGTGACCAGTTATTTTACTGACACTTATGGCACGGTCTATGATACGACCATGCTCCA  
AAATGCCCTACAGACCGACCAAGCCGAGACCAAGGATCTATTAAACGCAGCGTTTATCATGCGTATCATTGGTTTGGGTG  
TGCTACCAAGTTTGCTTGTGGCTTTTGTTAAGGTGGATTATCCGACTTGGGGCAAGGGTTTGATGCGCCGATTGGGCTTG  
ATCGTGGCAAGTCTTGCGCTGATTTTACTGCCTGTGGTGGCGTTCAGCAGTCATTATGCCAGTTTCTTTCGCGTGCATAA  
GCCGCTGCGTAGCTATGTCAATCCGATCATGCCAATCTACTCGGTGGGTAAAGCTTGCCAGTATTGAGTATAAAAAAGCCA  
GTGCGCCAAAAGATACCATTTATCACGCCAAAGACGCGGTACAAGCAACCAAGCCTGATATGCGTAAGCCACGCCTAGTG  
GTGTTTCGTCGTCGGTGAGACGGCACGCGCCGATCATGTCAGCTTCAATGGCTATGAGCGCGATACTTTCCACAGCTTGC  
CAAGATCGATGGCGTGACCAATTTTAGCAATGTCACATCGTGCGGCACATCGACGGCGTATTCTGTGCCGTGTATGTTCA  
GCTATCTGGGCGCGGATGAGTATGATGTCGATACCGCCAAATACCAAGAAAATGTGCTGGATACGCTGGATCGCTTGGGC  
GTAAGTATCTTGTGGCGTGATAATAATTCGGACTCAAAGGCGTGATGGATAAGCTGCCAAAAGCGCAATTTGCCGATTA  
TAAATCCGCGACCAACAACGCCATCTGCAACACCAATCCTTATAACGAATGCCGCGATGTCGGTATGCTCGTTGGCTTAG  
ATGACTTTGTGCTGCCAATAACGGCAAAGATATGCTGATCATGCTGCACCAAATGGGCAATCACGGGCCTGCGTATTTT  
AAGCGATATGATGAAAAGTTTGCCAAATTCACGTCAGTGTGTGAAGGTAATGAGCTTGCCAAGTGCGAACATCAGTCCTT

GATCAATGCTTATGACAATGCCTTGCTTGCCACCGATGATTTTCATCGCTCAAAGTATCCAGTGGCTGCAGACGCACAGCA  
ATGCCTATGATGTCTCAATGCTGTATGTCAGCGATCATGGCGAAAGTCTGGGTGAGAACGGTGTCTATCTACATGGTATG  
CCAAATGCCTTTGCACCAAAAGAACAGCGCAGTGTGCCTGCATTTTTCTGGACGGATAAGCAAACCTGGCATCACGCCAAT  
GGCAACCGATACCGTCCTGACCCATGACGCGATCACGCCGACATTATTAAAGCTGTTTGATGTCACCGCGGACAAAGTCA  
AAGACCGCACCGCATTTCATCCGCTGA

>NG\_065450.1 Escherichia coli mcr-1 gene for phosphoethanolamine--lipid A transferase MCR-1.20, complete CDS

ATGATGCAGCATACTTCTGTGTGGTACCGACGCTCGGTCACTCCGTTTGTTCTTGTGGCGAGTGTTGCCGTTTTCTTGAC  
CGCGACCGCCAATCTTACCTTTTTTGATAAAATCAGCCAAACCTATCCCATCGCGGACAATCTCGGCTTTGTGCTGACGA  
TCGCTGTCGTGCTCTTTGGCGCGCTGCTACTGATCACCACGCTGTTATCATCGTATCGCTATGTGCTAAAGCCTGTGTTG  
ATTTTGCTATTAATCATGGGCGCGGTGACCAGTTATTTTACTGACACTTATGGCACGGTCTATGATACGACCATGCTCCA  
AAATGCCCTACAGACCGACCAAGCCGAGACCAAGGATCTATTAAACGCAGCGTTTATCATGCGTATCATTGGTTTGGGTG  
TGCTACCAAGTTTGCTTGTGGCTTTTGTTAAGGTGGATTATCCGACTTGGGGCAAGGGTTTGATGCGCCGATTGGGCTTG  
ATCGTGGCAAGTCTTGCGCTGATTTTACTGCCTGTGGTGGCGTTCAGCAGTCATTATGCCAGTTTCTTTTCGCGTGCATAA  
GCCGCTGCGTAGCTATGTCAATCCGATCATGCCAATCTACTCGGTGGGTAAAGCTTGCCAGTATTGAGTATAAAAAAGCCA  
GTGCGCCAAAAGATACCATTATCACGCCAAAGACGCGGTACAAGCAACCAAGCCTGATATGCGTAAGCCACGCCTAGTG  
GTGTTTCGTCGTCGGTGAGACGGCACGCGCCGATCATGTCAGCTTCAATGGCTATGAGCGCGATACTTTCCACAGCTTGC  
CAAGATCGATGGCGTGACCAATTTTAGCAATGTCACATCGTGCGGCACATCGACGGCGTATTCTGTGCCGTGTATGTTCA  
GCTATCTGGGCGCGGATGAGTATGATGTCGATACCGCCAAATACCAAGAAAATGTGCTGGATACGCTGGATCGCTTGGGC  
GTAAGTATCTTGTGGCGTGATAATAATTCGGACTCAAAGGCGTGATGGATAAGCTGCCAAAAGCGCAATTTGCCGATTA



TAAATCCGCGACCAACAACGCCATCTGCAACACCAATCCTTATAACGAATGCCGCGATGTCGGTATGCTCGTTGGCTTAG  
ATGACTTTTGTGCTGCCAATAACGGCAAAGATATGCTGATCATGCTGCACCAAATGGGCAATCACGGGCCTGCGTATTTT  
AAGCGATATGATGAAAAGTTTGCCAAATTCACGCCAGTGTGTGAAGGTAATGAGCTTGCCAAGTGCGAACATCAGTCCTT  
GATCAATGCTTATGACAATGCCTTGCTTGCCACCGATGATTTTCATCGCTCAAAGTATCCAGTGGCTGCAGACGCACAGCA  
ATGCCTATGATGTCTCAATGCTGTATGTCAGCGATCATGGCGAAAGTCTGGGTGAGAACGGTGTCTATCTACATGGTATG  
CCAAATGCCTTTGCACCAAAAGAACAGCGCAGTGTGCCTGCATTTTTCTGGACGGATAAGCAAACCTGGCATCACGCCAAT  
GGCAACCGATACCGTCCTGACCCATGACGCGATCACGCCGACATTATTAAAGCTGTTTGATGTCACCGCGGACAAAGTCA  
AAGACCGCACCGCATTCATCCGCTGA

>MK965884.1 Escherichia coli strain CY307223 truncated MCR family phosphoethanolamine--lipid A transferase (mcr) gene,  
complete cds

ATGATGCAGCATACTTCTGTGTGGTACCGACGCTCGGTCAGTCCGTTTGTTCTTGTGGCGAGTGTTGCCGTTTTCTTGAC  
CGCGACCGCCAATCTTACCTTTTTTGATAAAATCAGCCAAACCTATCCCATCGCGGACAATCTCGGCTTTGTGCTGACGA  
TCGCTGTCGTGCTCTTTGGCGCGATGCTACTGATCACCACGCTGTTATCATCGTATCGCTATGTGCTAAAGCCTGTGTTG  
ATTTTGCTATTAATCATGGGCGCGGTGACCAGTTATTTTACTGACACTTATGGCACGGTCTATGATACGACCATGCTCCA  
AAATGCCCTACAGACCGACCAAGCCGAGACCAAGGATCTATTAAACGCAGCGTTTATCATGCGTATCATTGGTTTGGGTG  
TGCTACCAAGTTTGCTTGTGGCTTTTGTTAAGGTGGATTATCCGACTTGGGGCAAGGGTTTGATGCGCCGATTGGGCTTG  
ATCGTGGCAAGTCTTGCGCTGATTTTACTGCCTGTGGTGGCGTTCAGCAGTCATTATGCCAGTTTCTTTCGCGTGCATAA  
GCCGCTGCGTAGCTATGTCAATCCGATCATGCCAATCTACTCGGTGGGTAAAGCTTGCCAGTATTGAGTATAAAAAAGCCA  
GTGCGCCAAAAGATACCATTTATCACGCCAAAGACGCGGTACAAGCAACCAAGCCTGATATGCGTAAGCCACGCCTAGTG  
GTGTTTCGTGTCGGTGAGACGGCACGCGCCGATCATGTCAGCTTCAATGGCTATGAGCGCGATACTTTCCACAGCTTGC

CAAGATCGATGGCGTGACCAATTTTAGCAATGTCACATCGTGCGGCACATCGACGGCGTATTCTGTGCCGTGTATGTTCA  
GCTATCTGGGCGCGGATGAGTATGATGTGCGATACCGCCAAATACCAAGAAAATGTGCTGGATACGCTGGATCGCTTGGGC  
GTAAGTATCTTGTGGCGTGATAATAATTCGGACTCAAAAGGCGTGATGGATAAGCTGCCAAAAGCGCAATTTGCCGATTA  
TAAATCCGCGACCAACAACGCCATCTGCAACACCAATCCTTATAACGAATGCCGCGATGTCGGTATGCTCGTTGGCTTAG  
ATGACTTTGTGCTGCCAATAACGGCAAAGATATGCTGATCATGCTGCACCAAATGGGCAATCACGGGCCTGCGTATTTT  
AAGCGATATGATGAAAAGTTTGCCAAATTCACGCCAGTGTGTGAAGGTAATGAGCTTGCCAAGTGCGAACATCAGTCCTT  
GATCAATGCTTATGACAATGCCTTGCTTGCCACCGATGATTTTCATCGCTCAAAGTATCCAGTGACTGCAGACGCACAGCA  
ATGCCTATGATGTCTCAATGCTGTATGTCAGCGATCATGGCGAAAGTCTGGGTGAGAACGGTGTCTATCTACATGGTATG  
CCAAATGCCTTTGCACCAAAAGAACAGCGCAGTGTGCCTGCATTTTTCTGGACGGATAAGCAAACCTGGCATCACGCCAAT  
GGCAACCGATACCGTCCTGACCCATGACGCGATCACGCCGACATTATTAAAGCTGTTTGATGTCACCGCGGACAAAGTCA  
AAGACCGCACCGCATTCATCCGCTGA

>MK965883.1 Escherichia coli strain QHYN2016-F200 phosphoethanolamine--lipid A transferase MCR-1.21 (mcr-1) gene, mcr-1.21 allele, complete cds

ATGATGCAGCATACTTCTGTGTGGTACCGACGCTCGGTCAGTCCGTTTGTTCTTGTGGCGAGTGTTGCCGTTTTCTTGAC  
CGCGACCGCCAATCTTACCTTTTTTGATAAAATCAGCCAAACCTATCCCATCGCGGACAATCTCGGCTTTGTGCTGACGA  
TCGCTGTCGTGCTCTTTGGCGCGATGCTACTGATCACCACGCTGTTATCATCGTATCGCTATGTGCTAAAGCCTGTGTTG  
ATTTTGCTATTAATCATGGGCGCGGTGACCAGTTATTTTACTGACACTTATGGCACGGTCTATGATACGACCATGCTCCA  
AAATGCCCTACAGACCGACCAAGCCGAGACCAAGGATCTATTAAACGCAGCGTTTATCATGCGTATCATTGGTTTGGGTG  
TGCTACCAAGTTTGCTTGTGGCTTTTGTTAAGGTGGATTATCCGACTTGGGGCAAGGGTTTGATGCGCCGATTGGGCTTG  
ATCGTGGCAAGTCTTGCGCTGATTTTACTGCCTGTGGTGGCGTTCAGCAGTCATTATGCCAGTTTCTTTTCGCGTGCATAA

GCCGCTGCGTAGCTATGTCAATCCGATCATGCCAATCTACTCGGTGGGTAAGCTTGCCAGTATTGAGTATAAAAAAGCCA  
GTGCGCCAAAAGATACCATTTATCACGCCAAAGACGCGGTACAAGCAACCAAGCCTGATATGCGTAAGCCACGCCTAGTG  
GTGTTTCGTCGTCGGTGAGACGGCACGCGCCGATCATGTCAGCTTCAATGGCTATGAGCGCGATACTTTCCCACAGCTTGC  
CAAGATCGATGGCGTGACCAATTTTAGCAATGTCACATCGTGCGGCACATCGACGGCGTATTCTGTGCCGTGTATGTTCA  
GCTATCTGGGCGCGGATGAGTATGATGTGCGATACCGCCAAATACCAAGAAAATGTGCTGGATACGCTGGATCGCTTGGGC  
GTAAGTATCTTGTGGCGTGATAATAATTCGGACTCAAAAGGCGTGATGGATAAGCTGCCAAAAGCGCAATTTGCCGATTA  
TAAATCCGCGACCAACAACGCCATCTGCAACACCAATCCTTATAACGAATGCCGCGATGTCGGTATGCTCGTTGGCTTAG  
ATGACTTTGTGCGCTGCCAATAACGGCAAAGATATGCTGATCATGCTGCACCAAATGGGCAATCACGGGCCTGCGTATTTT  
AAGCGATATGATGAAAAGTTTGCCAAATTCACGTCAGTGTGTGAAGGTAATGAGCTTGCCAAGTGCGAACATCAGTCCTT  
GATCAATGCTTATGACAATGCCTTGCTTGCCACCGATGATTTTCATCGCTCAAAGTATCCAGTGGCTGCAGACGCACAGCA  
ATGCCTATGATGTCTCAATGCTGTATGTCAGCGATCATGGCGAAAGTCTGGGTGAGAACGGTGTCTATCTACATGGTATG  
CCAAATGCCTTTGCACCAAAAGAACAGCGCAGTGTGCCTGCATTTTTCTGGACGGATAAGCAAACCTGGCATCACGCCAAT  
GGCAACCGATACCGTCCTGACCCATGACGCGATCACGCCGACATTATTAAAGCTGTTTGATGTCACCGCGGACAAAGTCA  
AAGACCGCACCGCATTTCATCCGCTGA

>MK754161.1 Escherichia coli strain CTX148 plasmid pCTX148 phosphoethanolamine--lipid A transferase MCR-1.1 (mcr-1) gene,  
mcr-1.1 allele, complete cds

GTCAACATAAGGGGATGAGTCCTTAATAAAACAGGTCCTCAGAGCATACATATTCTGCGGGGCGTGCGGCAACAACAGGA  
CGAACCGGGGCGGTTTTCAATTTGCAGCCGCCAGGCTGCCGTGGTTCCTTTTCGGTGCGAGAGAAAGGAAAACAGGTGTTA  
TGGTATCGTGGACCATATACATGTTTGCCAGACAACCAAAAACCAGTACGGATGGATAAATCATCGACATAACAAGAGTC  
ATTGTCATTTTCAGAACGACTTCTGACAATTTTTATGGCCTGAACTAACCCTCCCGCAAGGTCGCCGCGAATTTACCGCT

GGATATTAATTGATATTCATCCTCCTTTATATATTTTTTTAATGCTGAAGATATTGCCCTGTGTTATTCAGTGCATTAA  
GGCACTCACAACAAATATAGTAGGTTGCAGAAGACCCCGTTTTCTTCCCGTAGTCTGTTTCTACATCAATCAGGTGTGTA  
AGAGCACGCTTTACATTTATGCCATCATTTAACATTCCAGATAAATCTTCATATAAACTTATTCTGGAATACCTGAATGT  
GTATTTTGCCAGCCAGTGGGATATTCCAGAGAAATCAATTTCTATCGAATTGAGTTTCTCAAATATATCTTTTATCGCCA  
TGTCCCCTCCGGGAGCATTGAGTATTTATCTTCGTCAATGGGGGATATGAAGTGTGCGGACAGCGGATCTACCAGGCCAT  
GATTAATCAGGTGTAATAAGTGCTGATTACGGGTAATTCCTCCAAGTTCATAGTGCCAGTATGATTTTGCTTCCAGACGC  
CCGGACTGACGATATAACTGAAAAAACGTGCGTCGGGTGAGACGACTTCTGCTATAACCGTTCTTCCCGTTACGCCTTT  
ATAACAGTGCTCGCAACCGTCAAGATTGCGCAACCGGACCTGTTCCGGCAGGCAATTTTCTCAATGAGTTTCCGTTCTT  
CTGTACTCAGTTTGTCTGCCATTTACGCATAAGTGCGCTTACAGTAAGGACAGAGTTTTTGTACCAGCCGTTGACTCAGC  
AGACCGATAAACAGAAGAGGATCTGCAATTAGCCTGGCCTGAATATTCTCCATTTCAAGGCGCTCAATAATATTCAGGGC  
ATCGTTGGCGTGTAAGGTCGTCAACAGAAGGTGGCCTGTCATCGAGGCTTTGATTGCTGCTAATGCCGATGCGTGATCAC  
GAATTTGCGCGTTCAGTATCGCGTCTGGATCAAGTCGCATAGCGGATTTAATCGCGTCAACCCAGCCATCGACGGAATCC  
CTGACTGCCGTCTGTATTGCGCCGGAATGCGGCCCTCCGGCGGTGATTCAATGGTGAAAAGGCGTTTTTCGGGGGAGACG  
CATATTATCGTTATGGTTGAAACCAAACGTGCTCAGATAGGCTTCTGAAGCCGTTCTCAGAGTCGTTGACTTACCGGACC  
CTGTAGGGCCGGATAAAACGATAATTCCTTCCGGGCGTTGTAACATTCGCCTGATTGTCTGGATTTGTTGTGGCATGTAG  
CCAAGTTCTTCGAAAGTGGGAATATCCTCGCTGTCATCTTTAATCAGGCGGAAGACCGCGTACACACCACCCACGCACGG  
ATAATGCGAATAGCGCGCCCCAAAAAGATTTACAGGCTTCAGAAAATTCTCTGCGATACGTGCATCCTGCGGTATTGCCG  
GGTCAAACCTGCGTACCTTTGATAACATCGCTCATTCCAGAATAGGCAGCACCCAGCAATTCCAGCCCTTCTTTACGCGGG  
ATGACATCCAGAATTTCCAGTTCCCATGCACGCGTGCTTCGACATAAGTGAACCTCGGAACCGTCCCGACCAGGTGTGAT

GTGCAAATCGGAACTTCCCAGGTTGTTTGCTTTCGCCAGGTAGCTAATGACCTTTTCCTGGTTGCTGTTTAAGTGTTGTG  
ATGAGTTTGAATCAGACCTTCTTTTCGCTGTCCTGGTAGCGGGATGCGATAACATCAAGAGTGGTCCAGGTTATATTTACC  
TTTCCGGGATATTTAACATTCAGAGTGCCAATATAAGCCTGAACAGCACGCTGTCCTTTACTGTTATCAGCGATATAAAC  
ATGAACAGGTTTATCGTCTTTTTTCAGATATACTGACGTATACAACATCAGAAATATCTTTTCCGGGATAGTCTGCGTCAG  
AAAAAACATTATGTGTCGTCTCTTTCAATAGCATTAAAGAATAAGCTGGCGTTTCTCTGTACCATTCTGAATCCAGACG  
CCATTACCGGTGATTGATGCCACCTTATAAGAAGTACCAGGAATACTTTGCCCCGACCTTGACATCAGTTACTGACCCGTC  
CAGGAGAGAAATTCGTGCTGACATTTGTTGTGGTGTACCAAATATTTCAATAACACGAAGTGATTTAGCGGCTACACGTT  
GCGCTGGTATATCGGTATCTGCAAGAGAAGAATACCCGGAAGAGGGCGTTATTGCTGGCGTTGCGGACGCTACACCATT  
AAATCAAGATTACGCAATTCAGTACAGCCTTCTGACGCGCCAGCTTTGCTTCGTAAATTACCGTTTCAGCCTGAATCTG  
CTCTACCTGTAAAATGGTCGGAGATGAATATTTTATTTTCGTCTTTTGGCGTGCTTTCAGATTCTGTTGCGTAAGCAAGTG  
AACTGAAAAACAGACAGAAATAATCGTTGGTTTAATTATTTTAAACATAGAATGCACCTTTAATCTCATAATTCAGTCT  
TCCTTCTTCCAGTTTTATTCCCTGCATACTGGAAGCGAACGGCAGGTTTCATGAAAGTTAGCGAAAAGTATTGAAGGCGGGG  
TGCTGGTCTGAATCATTAATTCATACTCGTTCCACGGGAGAATTATTGGACGGCCTTCTTCATCTGTTTTTGTGTTTTCA  
ATTTCTGCCAGGTGAGTTTTAACCTCATTTTTTGTGCAAATGTTGTCAGGCGTTCCTGAATATCTGTTGCCTGTGGCAA  
TGTGTCCGGGGTAATTGGATCAGGTGAAACGTCAAACTGACAGGAAGAGAAAATCCCCGGCGCTGCCTTCTGGCAATA  
CAAAAGTTGCTGTGGTTGTCCCCTGGAATATTTCTCGTATCCGTGTGCTGAAGTCCTCGACCGTAACGCCGCTCAGTTCC  
TTATATGATGTGCGTAACAGCCCGTCATTACCGGATGTGCTGCATTCAGCAAGGTCAAAACGCCATCCGGCGATCGATAA  
GGGCAGTGCATCCCATTTATCAATGCATTTATCAATAAATGGTTTTATTTAGGTAAATGTTGCCACGGTGGGGCAATCT  
GTATTGCCTGTTTGTCTGCCATTTCTTTTGCCAGACGAAGACGTGCAGCTTCTGCCGCAGCTTCTTTTCCCGGTATTCC

TGGTACATGGTGATCCCGTTCAGAGCAGTATGGCCAGAATGGCACTTCCGCCATAAATCATGAACTGACGTTTTCGGGA  
TACGCGAGTAAACGCCGCCTCTTTTCGGCGGTTTTTTTACGTCAATCAACGCAGACAGAGTGAGTGAGGGGAGTGCCTGGC  
TGATATCCCATGATTCAGGCTGGTATAGTTTCCAGCCGGGTCTGGTGTTTCATTAAACTCAAGAAATGTTGTCAGAGCA  
CTCATGATCTGACTTTTGTACCTACAACATCGTTGACGAGAACGTTATTGACGCAGGAAACAAAGCCATAAAGATCACC  
GAGTTCGCAGATAGCGTATCCGTCAGGTTTCGATGAGGGGTTTTATCATCAGTGCCAGTGACCAGAATGAGGACGCCCCCTG  
TGGAAGATCCTCTTTTCTGATAAATGCCACCATCGTTTTGGTTTCATTTTCTGAATCCTGATACTGACAGGAGAGAAAA  
TATTCAGCGTCGTTTTTCTTGCGAATGTACGCGCATTCTTTTCTTCTGAAGGAAGCGTTTTCCAGTCCAGACCGGAGAA  
AAAAGCACGCTTGTTTTTAATAACCGAAGTGAAATTCCGGTTATTCTGATTATTCTCAGACAAAGTGACCTCCAAAAAAA  
CTCCCTGTGTTTTTTCAGGGAGTTTTCAGTTAATTAGTTCACATTTTTTATTACTGCACTGGAGCCGGAATTAAGCACAT  
TTGGTGTAATCAAAACGACCAGAATCGTGTCGCCGTCTTCGCTGTTAATGCCACCCCCAAGTCCAAAGAAGGAGGGGGTT  
ATTACACCTTGCTTACTGGTTTTCCGGTTTGATTGCTGGAATCCACTCAGAATAACTGTCTGGCCTGATTTTCAGGTCAAT  
AGTCTGATTAATTGTTTTCAAATCCACATTCGGTGTTTGTGCTTTACTGCCGCCACTTTCGAACACCTCAAAAGTAGGTT  
TGTCAGACAGACTCATTGAGAACAGCAATTGCAGGTTTTGTGAATCCGGCTGAATGTATGGAAGCAGAGTCATATTGAAT  
CCGGTCGTTATTGTTGCCGCATTTCAGTGACGTGGATGATCCCACATTGGCGGTGGAATCGGTTGTGACACTTTCAATGAA  
GCCCTGCTGATTGGCAATTTGCATAGGGACGGGCGTCAGGTTTTTAGTCACAGCGGAGTTTTGCGTTACGACACTGACGC  
TGCCTTGTGACGACAGGGCTTTCAGAAATGCTTTTGAGCCAGCCAGCTTACCGTCCACGATGGATACACCACTGGTAATA  
ACATTCTCGGCGGCATTACCAAATGAGCCACCAAGACTCAGACCAAGATGACCATCATTAATACTGCGTTCCAGTCGAT  
TCCCGCCTGTTCTTGCTTGATTCTTGATACTCAGGATTTCAACGTTTCAGCACAACTGACGACTCATTTATTATTGC  
GCTTGTTACAATCTCCTGAACGCTGTCCAGTACATCCGGGGTATCTGTTACTGTCAGTGAACCAGTGGACAGATACATG

CGCCCTGTGCCTGGTGTGTCAGCATTGAGGAACTTCGCTTTTCAGGTCGTTGTACAGCGATGATTTTCATTTCCACGGTTGT  
AGTTTGCGTATTTGATGCGTCGCCAGTCATACCGCCAGAGCTGGTAGAGCCGGTACTGCCGCTGGAAGACATTGTGCCGC  
TCACAACTTTTGAGTTGTATGCCACATTGCTGTCCATATATGTGATCGGGAATGAGCGCGTTTCCAGATAGAAGAATGTG  
ATACGACCTTTATCGTATTTCCAGGATATTCCCAGCCGTGAGGATACGGTTTGCAGTAGGGCAGGAAGCCCGGAGATATT  
CAGTTCCGGGAGTGATGTACCGCCAGAAGAGACTTTTACTGGCTGACTGCCTACTGACGCCAGAGGAACCATTCCATTTG  
CATCCGGTGCTGGAATTGATCCTGTCATTTGTTGTGTTGAGCCAGTGCCTGTACCGTTCAGATAGGTCCAGACATCGGCG  
CTGATTTCGTACCGGGATATGACAGGTTTGTGTGATGCGTTGTGCGATCTGGCGTAGCTCAATATCTGAACGAGTATTAAT  
CACAATCGGGCAGGGCGGCGCTGATTGCTTTACCTGCTTTTCAATAATTGGCGTTGTATTAATCCATTGTTTTGTTGAGT  
CCTGGATAACCGGGTTATTACGAATTTTTTTCGCGTATTCAGTCGCTTTTTGTGCGTCTTTTTCGGCTGCAAGTTCATTA  
GTATTGATTTTTTTGAAGTTTGCACAGCCTGATAATAAAAAAGAGGATATTAATAAAACAAAGCAATTTTTTATTCATATT  
TAATTA ACTCCGGTACTGGAATGATAACTGTGCATCCTATTTTCATCGTGAGAGCGGGTTAACGATATAACTGTGTGCGAAA  
AGGTTTTGTATCTGCACGCCGCCATCTGAAGGAGTCGTGACAACAATAAGACGTTTGCCACGTTTCCTGGCTGTTTTAAT  
AAATCGAACAATAAACTGAACAACTTTTGATTCCCGTAAGTTGTTACCGATGGCTACACTATTAAGAACCAACGTTTTTT  
CAGGTGCAGATAAAAAGTCAAAAATAATCAAAATTTTCATCGCAAAGATAATGGTGTTTTAGAAGGGGAAGGTGTTTCATGG  
CGTTTATAAATATCACAGAAATCAAAATATTTAACGTCAGTGTCAATTGATTAGCAATTCTGCTAAAAGTGTTGATTTTCC  
AGTTCAGTTTCGCCTATAATCAGAATATGTTTTTCAGAGTTTATCAAAACATCAATGGCTTCTTTCATCATATTCATAT  
TCATATTCATATTCATATTTATCATATTCGAGTGTTTTATTCTCATAATAGAATCCTGTCTTTGCTAATCAATAGTATCT  
TTATTGCGAGGATTATTCAGATACGTCTGTTTTATCGTGATTATCAAGGTCTGGATTAGTAATCACATTGCCTCCGGCAA  
CCATGACTTTTTTTTCCTCCAGCTTTAGGGAGATAAATTTCTGCAATTTTTGCTATTTTCATCCATGACTTCTTGTGTAAAC

AGGTTTGAATGTCAACATGATTGTTACGGGCGATATCCACGCGGCGTTTAAACTCTGGTTCTTCAAACCAGATTATTTT  
GTTGGCAATAAATGGTCGGCTAAATTCAGTGGTTATAATTTACGGATTGCAATATTTCTGGCTTTATTCTTCTTATCCC  
GGAGAGACACAATTTCTTCAGGAAGAAGAACCGGGCGCTCTATTACATCATCATTCCGTGTACGTGAACTTCCTCCCTTA  
CCACCACCACTGGATATTGAGCGTTTGGATATTTTCATATCACGCACCCCAATCTCTTCTGAAATCTTTTTAGCCAGAGC  
ATTTTTTGATTTTCGGCGGATAGTAAAGCACAAACAGCACTGTTTTCAGTGAATGTGGTCCATCCTTCCTGACCGTACATAT  
CGCTTTTTTGCCCTTGTCCTTCATTCTGAAGAATGAACATAAAGCGAAGGTTATAACCTGCTGTAAAACCAACAGCGCGT  
TCAATGACCTCCGATTTACCCATTGATGTAAATTCATCCAGGAGAATAAGGCACTGGTATTTACAGGTCCGGGTTATGTTT  
CGGCAGTTCACGACAGTTTTCATTAACCAGTAATGAGAAGAAAAGGTTTACAATTTTCTCATGAGTGATTAAGGCATCCG  
GTGTCAGACCAAGATAAATTGACATGGGTTTTTTACGAATATCCCGGATATCAAAATCACTGAAATTCGTCGCTTCAGCA  
GTAACAGGGTTGCTGAATATATTCAGTGGTGATGAAAAGTTCGTTTTTATACTTCCCCTTGTCGATCTGGTGCTGACAT  
GAACTCAAAGAAGAATGATTTTGTTTTATCGCTAATCCAGCTACGATTTTCAACTTCCTGTCCCATCCATGCGGCGAGAT  
CTTTTCCATTATCGGGAATCGACGTTTTTCAGTATGGCGCTGATGGAAACAAGGACGTCCGGTGCAATTATGACCTTTGGCT  
TTCTGGTCCAGGTGAAAACGCTCCTTATCCAGCAGGTAAAGCCCTAACCCGACAAAAAGGTTGCGTGCAGAATCAGACCA  
TATAGGATCATCACTTGCCGGGATAAGGATTGCGGCAATTTTTGCCAGGTCCGTTTCACGAAGTAAATCACTGCGACTGA  
CGCAATCCAGAGGATTCCAGCGGTGAGAGCGTATCTGTCCTTTAATTGCCTGGTCGATAGTTTCCGCGTATCCGGCGGGC  
GCAAAGAGAAAGCATTTTTTGCCCTAATTCTTTTTGCCTGAATCCGGCTGATAAAAACCAGTTTTCAAGTTTGATATCCAG  
TATGACCATACTTCCTGGATAGTTTACGCAGTTGGGGATAACAATCCCCACCCCTTTACCAGAACGTGTCGGGGCATAAA  
GAATTAAAAATTGTTGTCCGGCGAAATAAATAAATTGTTTTTTGTATCTCCCCTTGAACATTTTACCGATGAGTATTGGT  
GGATGTTTGTAAGGTGATTTTTTATCCGGGAAAAAACCTGATTTACTCAGGTCCATATCAGTTGCGAGCCGGGCGTCACC



GTAGATGACTTTTTTAGGCATAATCCCAATCACGACAATTAACATGAATATGGCAAAGAATATTAATGGAACGCTGAATC  
CAAACCATGCCATAAAAACGAGTTTTTTATATTGTGGGTGCCAGAAAATGTTGAGATTACAGAATGGAATGTATCCCAC  
TTGAGCAAAGACATATCAACGGATGAATATCTTAATGCTGTGTATCCACCGAGATAGTTTGAGGCTATAAGCACACCCAC  
AAGAAGCAGTAACAGGAAGAGAATTAACCCCCCATCTTTTTTGCATTCATAGTTATCTCCACAATTTACATTGTGCTCA  
AAAAACGATTTTTTTCTTCGGGTTCGTAATACAGTTCAGTCATTCTGGTATGGTTGAAAAAAGAATGACATCAATTGAT  
GTTTTTATCGTGCGCATGATGAGGTCCATATCAACAGTCATACCAACATCAGATTGTTTTACAATACTTGCCAGTCGTGA  
AAATGAGGCATAAGTATTATTAGCATGAATGGTACTGATTGAGCCTTCATGCCCTGTATTAAGCGCCTCCAGATAACTCC  
ATGCTTCGTTACCCCTAAGTTCAGCAAGAAAGATGTGATCTGGCTTTAATCGCATACACGCTTCAATGATTTCCCTCGCT  
TCAACGGTATTTTTTTTTGTAGAAAAGCCGGATATGGTTTGGATGCAGCGGCAGAGACATTTCCGGTACATCTTCAACGGT  
TATATAACGCCGTTTCAGGTGGAAAGATATCTGCAATTGCCTTTGCTATAGTTGTCTTACCGGAGCCAGTCCCACCGACGA  
TTAAAAAATTAAGACGGTCTTTAACTGCCTCTCTTAAAAATCGAGCTTTAGATTGACCATCTGGACGCCGGGATAATTCA  
TACAGGTAGCGTTGCCGTTTCAGTCAGGATGGCTTCGTGTTTCGTGCGCAATCCTGACATTATCAAAACGCCCTGTTCCGAC  
ATAATCATCTATAGTAAAGCGCGTTAATGATGGCTTACGGATAGATATCACAACGCTGTTATTTTCTGTTGCAGGTGGAA  
TGATGATTTGTCCACGTTCCCCACCGGAAGAACTACCGATGCAATGGGATTATCATGGCTAAGTGGTATTTTTATCTTT  
GATAAGTTCGTCAGAGTTTTGGCAAGTGTCAATTAAATTATCAAAAGTCGCGTCTGGCGCATCTTTAGATTCCCAGCCATT  
TTTCCCTTCAAACCATATTGTTCCCTGGCTTATTCACAGATATTTCTGTGACATGTTCAATATTAAGAACAGACTGGATAC  
CCGTCATATCCAGATATCGTCTTGCGGTTTTACTGTTATCTCGTGGTTGTGATGTATTACTGGTATCTCTGATGTTATTC  
ATATCAATTGCTTTACTGAATTACTGAAGTTCATATACGGATGAAAAGTCGATATTTTCGCGGAACAATAACAGACAATAC  
AGTCCCCTGATTAATATATGCCGTGGGGGAATATTTATCGTATTGTCCAGCGTTGTTTTTGCCATTTCTTTTGTTGCGT

CAGATGTGTTTTCGTAGGTGATATTGCTGTTTGAGCCTGTTTGTTGCGTGCTGTTTTTCAGAATATCTAAACCATCACCA  
AGTAATGACAGCAGCAATGCACCACCAAAACGCTGACCAAAATGATTATCGACCCATGCAGGAAGGCCGGAAGCACCCAG  
ACTGTCAGTGCCAAGTGCGCCAATGCGCACATTGACATTTTCATCTTTGAGCGTTGTCCAGTTAACGAACACACGGGCTA  
CTCCCTGTGTCATGACTTTATTCTGCTCCCCGATCAGTAATGCTCCTTTACGGGCAAGAAGCACTTCGCCGTTATCCGAC  
CAGACGTCTCGTGTTAACTGACACATTGTGATACCGGGATAAGAGGTTACGATTTTCGTTTTGAGCACACAGGATAATGC  
TGTTCCCGCAGATAACAGATATCGGCGGTTGAGCACAGGGGATACCTTTCCGTCTGCGTACTGACTGCCCTGTAAATCAT  
CTCTTTCCTGGTTTTTTTTCGCCTTGTTCCCTGATTGTCGATCTTCACCATTGTGTCGCCCATCAGTTGTCCGACGGATTTT  
GGCAATGGTTGTGGTTGGTTTGGATCTCCACTGGCGGTTTGGGGAGTGCCGTTGGCTATCACATTGACGGCTGTTTGATC  
GGCCTTTTGTGATGCTGGCGCTGACGGGGCATTGTCTGCCTGTTTCTGTTCTTGCTCCTCCTGTGCTTTCCTGCGGTTAG  
CGGCATCGAGTTTTTCTTTTCTTCGATGTTTTTCATCATTGTTGTCAGTGAAACGCCATTGTTGGTATTTGTGACCAGT  
GTCTCGTCAGACTTCTCAAGAGGTGTTTGCTGAACGACCTGTTCTCGTGAAAGAACTTTAAACAAGATAATGATCACAAA  
TAACGCGGCAATCAGTAATATGATGAGGATTAATATTTTTTTTGGTGCTGCTTTACCTTTTACTTCGATAATTCCGCGAT  
TTCCCGCGTCATTATTTTTTTCATCATCTTTATTTTTTCATAGCTGAACTTCTCTACTCGTGTTTTTCCGTTTGACGTACC  
TTTTTTATTCCACGGACGATTAACGATTGATGATGTTCTGATATCTGCAACCTGATCACCCAGGCGCAAACGGAGATTTT  
CAGCCACGTCATAGTAAACCATTGTGTTTTTATTTCTGTCTCCGTTAACCAGATGTTCAATTTCCATCGGCATCAACACGA  
TAAAGGACCGGAATTTCTGTTTATTAGTCCATCTCATACATGTAAATTGCGCATTATCCCATACCTGATAAGGGAAAAT  
TGATTTGTCCCCCTTGAGTTGATAATGACCATTAATTATTCCACCATCAGTGCATGGAAATGGCTTTTCAGTCATTACGG  
TAGCTGACGGTGGTTTCGGATAATTAAAACGCAGAATATACGTGGGTTGTTTCGTGGTTGATATCAGGTAAAGAGGATAT  
ATATGCTTATTGGTCTGAACGGTAACGTTTGTATCCGTTTCTTCTGCTTTTGGACGCAGAAACAGAGTGTTGTCCCTGAC

CGATACTGACCAGGCTTCTGGATCACCAATTCCGACATCTTTTATTGTTTCGTCTTGTCCGAACCTTAATTGTTGTTTGTG  
CGCCTGCTTTTACGCGCACATTAAATACATCCTGCTCGTTATAATCTACGGTCTGAATACGCCCCGTCTCGTTCCGATGGT  
GTGCCGTACATAGCTGCTAAAGCACCAGGTACTTGTAGCATCGACAAAAGAACTATCGCAGTAGTGCGTTTAAGCATCAT  
TTTATAACCTCTGGATCAGGTTGGTAGCTCAGAACTTGCAGTCCCAGCGGATTCACAAGGCGCTCTTTTTCTGTTTTGAT  
ATCTTTATCCCAGTCAAAAGAAATCGTCGAAATCCACTCTGTTGCTCTGTATCCGGGGGCGGGTTTACCAGATAAATCCA  
GTACCATTTTTTTGAAACGCACCTGCGCCATATCCTTCCTTAGAAGGATTACTGAATTAATCTGGACCTTAATTTTGTAG  
TTGTTTTTCAGAATGTTCAGTGGTGAGGAATCAGCACGAATCATGGTGTGATAAGCTGAAAACACCTTTTGGGAAGACAT  
TGTTTTTACTGTATCGGCCTGTTCCCTGGATAGTCTGCCAGTCGTATGCTTCATAGTTAATGAGATATTTTGACAGGAAAT  
ATTTAGTCTCAACATCCTGATAACTTTCCTTAGCATCAGATAATTGAGGGGCAATATCAGTATATCCAGTGCTGTTATCC  
ACTCGCACAAGGAACGGTACAGCGGTTTTTAATGGAGCAAGGGAGGCTATTGCGAAACCAAGAATGCAAATTACAACAAA  
TTCACCAATGGCGAGAATGGTAAATGTTTTTGCCTTTTTCTTTATGATTTCAATTTCACTACGCTCAAAGTCACGTATGG  
CCTTGAAATAATCCTTTTTTTTCGTTCTTTTCTTCAAATTTCTTTTTGGAGGCTTCTTTTTTTGAATGTTTATAATAGTTT  
GTGTTTTCCATTAATAATCACCTGCTTTGATCTGTTCAATTGCTGTGTTTAACTCAAACCATCCCCCTTTTTTCTGCACA  
GGATTGGGGGTGTGAGAACATGCACTAATTAATAGCGCGGAGGCAATTATGAGGGGGATTTTCATATTGTTTTCCGTTCT  
GTATAAAACAGAGAAATTAACCGTTCAGGCGTTTCAGGAGTTCTGGTATCCAGATATCAGGAGCTACATCTCCTTTTTCA  
GCAATAATCTCATCAAAAATAGACAGGCCAGTTTCAGAGCCAGAAAGCACGGGGATAAACTCATCGAATCCAAACAAATC  
CATTTTGGCGAAAACAGAAGAGCCAGATTGCTTGATGAGCATGGTCCTTGACTCCTTCGTCAGTTCTTTGAGTTTTTCAA  
ACTCTTTTTCAGTAAGCCCAATTTCTTTATATCCTTCCCATTTTGCATCGGGATTGGGCAGGAGAATTTTCGTTGCGGTT  
TGTTGTACCAGCGCCGCAAAAATTGCGCAGTTTATGGCGTCTTCCGGGGACTGTGATGTTAACCACATCATTTACCTTT

CATGCGCCCCGCTTTCAGTGCGCTTTTAATCATGCTTTGTGTCATGGGAAAGTTTGCTGGCATCCAGAACTCTTCAATAA  
TGGAGAGCATCAGATTGCCGCCGCGTTGCATGATTTCTTTGTAGAAAAACAGGACCGCGAGTAAAGGTTACAGGCAGGA  
TGAATACCGTTTTTTTGTGTCCAGGACAACGGTTGTATCAAATCCCACTTTTTTATGATGCAGTGGATTGAAGGTATTCCG  
GGGGGAATCCACCGCCCAGGCATATTCGCCGTTGTCGCACCATTTGGCGAGACGCGTCTGAAGTTCAGGACTGACTATAT  
CGAGAAGAAGGGCTGTCCGGCGTTCTTCGACAGGCATTTCGCATAATGCTTTCCACGGCAGCGTTTAATTCAATGCCATGT  
TCATCAGAACAGGGGTTGCCCTGATTGTCTCGTGCCAGAACCTGTGTCCAGCGTTTCAGAAATGCGAGAAGTCTGTGCCA  
GACGGGAGATTCCGGGCCTTCTGCCAGTTGCCACGGATTGCAGCCTGTATAGATACCTTCCTGCAACGTGAAATAGCTCC  
CTCCGTATGCGCGGACAAAAAGTTCGGTAGAACGGTTGTAATCCACAACAAACATTAAAGGGTCAAAGCGTTGAAGAAAG  
CCGCTGGCTGTTGCTTCAAATGTTGTTTTCCCTGTGCCTGTTGCGCCAAGAAACATTGCGTGTCCGGCAATTTTTTGTCC  
GGTAACATTTTTTTCCGGTGGGCTGTAATGTGTATTGAACCAGTAAACGCTGCCTGAATCCGTTTTTAAAGGCATTATGG  
CGGAGCCATCACCAATAGGATTGCCTGATTTTTTCCCGGAGGAATAATTGTGAAAAGACATCAGACAGGCCAGGTTGGTA  
ATTGTTCTTCGGGTATCCAGTGGACGCCTCTTATTCAGCGGCATATGACTGAAAAAAACAAAAGGTGATGCGAGTGAGGC  
GCGACTGAAGCGGAATCCCTTACCCGAAGTAATAAACTCAGCAGAGAGCTTTATACCATTGCTTCTGGCCTGATCTGGTG  
TATCACCGAATACCGTTAATGCGCAGTGTAGTGAACCAAACAACGTAATTCCGGCTGCGACCGCTTCTTTACCAGCTTCG  
AGTTCTTCCTGCTGTATTTTGGCTGCATCATTAGCTGATTGTAGTTTGTTTAACTGTGAATCGATATTCTTCAGGGTTTT  
TGTTGGTGACTCAAAAATAAAGGATTGAGTAAGAATAAATTCATAGGGTTGTTTGAGAAGGAAATCCCATTGTCCGGGGG  
TTGTTTCTATCGGGAAATCCTTCAAAATATAATTCGTTGCGAATTTTTTACTATCCGATTCGTTGTTACGCAGTTCAAGA  
ACATCAGCACCAAAATACCATTGAGAATCACAATGCTGGATGATAAGGGGGTGGATGATAAAGGAATCATGTTGTGTTT  
TGCATTTAGCAATAGTGATAGATAGTCTGCCACCTCACTAATATAAGTATTGTAAACGGATAATAAAGAAGCGTTAAATG

GTAGAAGTGCTTTTTGCGCCTGTTGTGTCATTTATTTCATGCGCTCGATTCCGGTATCAACATCATCGTAGGGTATCCCA  
AATGTCAGATAACCATGTTGATTTATAGAATGCGCTGGATGTGAACAGAGCAAGGTATTTTTTTGAAAACCTGCTTAGAAA  
ATCATTGTCAAAATTCCATTCTCCATTGATGGTTGCTCTTTTCTTGATAAGATGAGTCCATAAATACAGGTGCGCTTCCT  
TTCCTAACCCAATCAGGAAGTTTTTAACGCTGTTAAATAAATTTGTAAGAACATTATCGTTCTCTGTCTCAAATGGAATG  
CCTGCTACAACAAGTGAAGCCAGCATTTTCCTGTCAGAAGTAAAGATAATACTGTCTGTTATATGGAAGCGATAATCGGG  
ATATTCACGAGCAACATCCATATTGTCACTGTTTTTTAATTTGATTTTGTGCATATATGTTACCTGACAGATGAATAACC  
AATAATTAAATCTCTGTGGCGGATTTTTAACAAAAGCCCCATAAGGTTTAAACGGATGACTCTTAGTGCGTTTGAGTCAT  
TTTCACAGGCCAGTTTTACTATAAAAAGAAACAGCGCACATATGACAGGAATAATTATCCCTTTTATACCCCAAAGGAAA  
ATAGCGGGGAAGCCTGTCAGAACAGCGAAAAAAGCCGTGAACAATAACAACATTAAGGGTATACCAGCAATTAACGCAG  
G  
ACGGTTAAACCCGTTATAAGTCATGAATGACTCACTGACATGTTTCATTTACTTTGTCCATAACTCACCATGAAAAAAGCC  
GCAATTCACACATAAGGTAAATATGCGGCACAGTTGTATATATGGATTACTTATTTGAAGAGTTCAGCGCCCAGTTCCC  
GGCGTAAAGTGCACCGCCAGCGAGGGAACAATAGACAAGCGCCATTCCCTACATCAGACCAGCTTTTCTTCTCCATGAATG  
CCATGATGACGTTATAGATCAGGTAACACAAAGCACAAACACCACCAAAGCTAAATGCCCATGTCTTAAGTTCTGTCATG  
GTATTTGTTGCGGTGTCGAGTCCACCTGCATAGGCAACGGAGGCAGTTAGTGACAGGAAAAACGCCAGAATAAAATACTG  
CAAAGTTGATTTGACTTTCATTAATACTAAAATCTCCAAAAACATCCCAGTCCGGTGATGTTTTCTCTTCATCGTTCGGGGG  
GGTTATTTCTGATTCATCAGTTTTTTCACGGATTGATGGCACGATATAGTTATTCGCGTTACGAATAACCCGTTCCAGAT  
AAGAAGTGTTGTTAAATTTCTTTTCTTTTATAAATCCTGTTGATTCGTTACCCGAATAATACAAAGATAAAGCGCGGAGA  
ATTTTTTGATTACTACTACCCTCCTTTTGTCTCAGATAATTGTCCGTCAGGACTGCCGCTCCTGCTTTTATATTTGTACA  
CGGGTCAAAAACCTGTTTTATTAGTCAGATTGAGTGATGGGAAATTTTTGCTGTATATCTGTGTCAGACCTGCACTAAACC

TTTTATTTTCTGCTGTTAATTTTCTGCATATTCAATAGCTCCTTTTTCATCTTTAAAATACTTACTTGTTCCGTCAGAA  
ACATTCGCTATTACATATGGATTAGCCCCTGATTCAGTCATAATCAGGGCATTTCATCGTATCGGGTGATACATCAGGGGC  
ACACTGACTTATCAGTGCTGCCAGAACAGCCGCTGATAACTGCATAAGGGATTATCTCCTGATATTAAATTCGTGAAGA  
TCGTTTTTTCCTGCGGGGGCGACGAACGATACTGTCCAGCTCATTAGCGCCGGAAGAAGTTCTTTCAGCGAGACAATTT  
TTCCCTGACAGGTATAAGGGATTTTGCCCCCGGACATTGTTCAAAGTCTGATTTGTACAGGTCGTATAAAACAAGCGTA  
TGTTTTACATCCTGTGACAGATAATTATGTTTATTCTGGATGTTACCTTGTTTCGATATTTTTGATAACATCTGCTGAACG  
ATGAATTAAATCTGTGTAGATTTCGGGTGTTTTTAAGAGGATTTATTTTTATATATTCAGAAGCAAGCTGAATAAGATTGC  
ATCGTAAGATAAGGACTTCACGAGTGGCAATATCAAGCTCGCTGACATCATCATTATCCTGCATGGGTATCTCCGGTAAA  
GATTTTCTGGACTGAAGTCCGCGCCGTAGCGATATATCCGGCCACATAATGATGTGTTCGGATATGCAGACTCCAGTTCA  
GAATCCCCTTGTCAGGGGATATTTAGTTAATGAGTACAATAGCCTCTTCTGGAATGGAGGAAGGAACGGGAACGCCCAT  
TCATTCCCCTGATTATCGACAATCTTCTTATTTTTTACTTTTCCTAACATTGCTGAATGTTTTGTTTGCTGCTGCAAAGC  
AGACATCAGACCTTCTGTATCGGCAGACCAGATATAAACTCGCTTACCGTAAATAATATGATGAATATCATAAACGGGTG  
TTATACCGATTTGCTCAGATGTTAACGTTCCCTCCTGAATTACGTTTGTCTGGATATTTATAAAGATAGTCATTGATAACA  
TTTGCGAAATGGACAAATTCAATTGCTTCCTGTTTTGCAGGAAGCAACTTCATTTCGCTGTATGGTTTGGTTATTGTTATC  
TGTCAGATAGTAACTGCCTATTGACAGGAATATCAGGAGCAAGCTGAAGAACCAACCCATAGCGATTACTCCTGTTGTGT  
GTCTTTAATTGTGATTACGCATTGTGCAATATTCCTGAATGCGTATAACGGTTTATCTGCTGAAAGATAAAGCATCAGCG  
TATCTTTTAATGCAGATTCAAAGTTTCCCCGGAAAATAAGAGGAGCATCTATTCTGTAGTTCACAGGAGTATCCCATACA  
AGATTCCAGGTGAATTACCACACGGCGAACTTGACGCCCATTCTGTGAGGCCATCCCGCAGCGTCGAACCTTTTTTAAG  
ATTCCAGGTGAGTTTTTCTGTCTGTTTTTGCGGAACGGTGACAGGCGTTAGCGATTTTGTAGGTAACCTTGTCAGAGGAAA

CTGGTGTCTGACAGGAGATGCAGGGGTTTTGTCAGGAGATACAGGTGCTTTTTGTGATGTTTTCCCTTTCTGTTGTTGA  
AAATCAATCAGAAGATGTCTTTTTTCGGTGTCTTAATTACCGTCAGACCGTAGTTGCGAAGCATTTTATCCAGGACATA  
AGGCCATTGATCGTTGCCCTGCCAGGATATCGTGCGACGGAAAGTTTTCGTTACCTCCGGGGATATTTAGCCGTCCAGT  
CCGATGGGACAATTTCTTTTAATGCTTTTTGCAGCGAGCCTTTACCATCATGGCGAACAAAGTAAATTTGCTTTTCAGGT  
GTTGATGGGCCTGTAAGCGTGGTGGCCGGAACAGCGTTGTTAGCGTTTTTTTTTCAGAAAACCGCTTTTTGACATTAGCGG  
TGGTTGTTTACAGGACGCGGTTTTGTCTGCTGATCAGTCTTTTGTGCCGTTTGTGCCTGATGGTTGTTGCTACTGATTGGCT  
TTGCGGGAGGGAGTGCTGGTTGTTTACAGAAATGCTGTTTACAGTTGCTCCTTTGGCTGCTGTTTTTATCTCACCAGATGAAGTT  
ATGCTGTTTGTGTTGGCTTCAGAAAACCTATTATTGCTGCCCTGGTTTTTTGGCGCTGTCGCTGATTGCTCAGAACGTGG  
TTTTACGGTTTCTGCAATACGAGGCGCGGGAGTTACGTTTATGGCTTCCTTTTTGAGATAATTATCATTGCTGTATTGAA  
CAGTGCTGTTTGGCTGTGACACGGGCTGCTGAAGGACCACCCCGTTATAGTATGTGTCTGCCCTTACCTGCTCAATTGTG  
GTATTCAGTTCATACCAACCTCCTTTTGCCTGTGCGGGTTCAGGGGCATGGGAACACGCATTCAGCAATAATGTGGTGGG  
AATAATAATGATCTTTTTCATGGTTAACCCACAGGAACGTCCGAACCTTACTCATGATTTTTGAGATCGCCGCAGGGTCTGC  
GGTCGTGCATTGATTAAGAAACGCTTTTCGGGCATCAAAGGTTTTGCTCCAGCGAATAGATCCCTTTTTCTTTTTGATGA  
TATTAAAGAAGTCCTTTTCGGCGCTTTTGCATTCGCTCCCGCCGCGCTACCGATAGCTTTACCGTACAGACAAAGAACG  
GAAGCACACGGATCAGACGCATATACGGGGGCAGAGAGTGCGATAGCACTTGCGGCAACCATCGATAAAATGATGGATT  
CATGGTGTTCCTCCATATTTAGGCAAAAGAAAACCCGCACGAGGCGGGTATGAATGAGCCATTAAAGGCGGAATTGCAC  
TCTTTGTTTAGTTTTGATATCTATCCTGGTGCATCATCAGAACAGAATACTGGAGTTAAGTTGGCTATGGCGCGGTTTTA  
TTTAAATGTTCCGTTTGAAGAAAAGGATTTGGCTAAACAAAAAGGGGCGCAATGGGACCAAGAACAACGGAAATGGTTTG  
TTCCACAGGGGAAAAATCCAATTTATTTTATTCGGTGGATAAAAGAATTAAATGAACATGATTACAATGTTTTTTCGCAA

CGTTTTTATATTGCGGAAAGTCACCAGTCTTGTTGGCGCTGTAAGAAAACAACCTCCTGTGTTTGGTATTTTTTTACCTCG  
TTGGTATAAGTATAGAGACGTTATTTGGGGAGTTGATCCTGCCGAATGGGAAGATTGTATATTAGATGAATGGTATGAAA  
CATCCTCCCCTAAGGGTATGGAGTATTTTGATTCAAAGAAAAATATGATTTATCGGTGGTTAACCAGTAGAGTATGGTGG  
ACTGATTTAACGAAAATTGAAATAATTTCAACCTCTGCTCTCTCAAGGATTAATGAGTATTCAAATTATATTATCCATC  
CCATAGCAAAACAGCAAAAATGAAGTATTACGCGAATCATTGTTGTCATTGTAACGCAATGCAAGGTGATTTTATGATGT  
TTAATGAGCCAGGGGGCGTGTTCTTCCCTGTAACATATGAACAGGCGGAGAAAATAAGATTCCATGAAGTCAATGAAACA  
ATATTTGCCAAAGCAAGTTATAGTTTAATACCCGAAGCCGGAGGTTTCATAGATCTTTAAGCAAGATAAGACCCGCACGA  
GGCGGGTATTCTTTTAAATAGAATCACCTTGCTATAGGGAAGGTGATTCTATTGTAAACGTTCCATTAGATCCCGCACTG  
TCTTCTGTACTCTTCTTTTTGTGCGTTGTTCTAATGCAGCACGAACATTAGAACTATTTATCAACTGGTCACTGCGTAC  
AGCCAAAAAAGCCCGCTTTGCGAGCTGTTTTTAATGAAGGATTATTGCATCATATTTTTAAATGCTTTACCCGATTGCT  
CTTTTTGAATGGCTTCACGCGCATTTTCGCAGTTTTGACCAGACATATCCCCTTTGCTGCATTTTTCGACAACATCTTGG  
GCTTGTTCAAGATGTTCAAGTGTAGTAACTGACATCATAAACTTTGTCTTCACAAGCAGCTAAAAGGAAGCATGACAAGAT  
AGTTAAAGTGCTTATGAATTTTTTCATTCTGAACACCTATTGCATCATTAATTTAACTTTTCTCGACTAACAGCCTCTTG  
TCTTGCATTTTCAGACGCGATTAGCTGTCTCTCTGCAATATCATATTGCTTCAATTGTAGCTCCATTGTCAATTTTTCTG  
TATTCAATTGGTTAGATAAGTCAGCTTTTTTTTTGCGGAGTATCTGCTGACGCGAACTCCTTCTGTAAACGTGGTTAATCTC  
TTAGCCCTTTCCTGCATTTTATTGTTGAAATTTTCATAGAATTTGATCTTAGCCAGGATTGCATCATATTTTTGTTGCGT  
CTCTGCAATGTTGCTTGATAAGTCATATTGCGATCGCAAAGAGCTAAGATCTGATTTTGCATTTTGTATTGTTGATA  
GAGAATCCTTCATATAGCTGGATGCGCTATCAAAGCCATTGCTGAAATCAGTGAAGCCTTCGAGTCTTTTCTTCTGTTCT  
TCAGCGTATCTTATGGTCTGTTTCATATTGTTGCTTGAGTTGCTCAAGCTGTCTTGCCGCTTCAGCGGCACGATTTAGCCC



TTCTTCAACTGTTTTAGCTATCGCTGTAACGTCTACTACTGGAATACCAGATGCAAAGATTGATGGTGATGTTACGGTAA  
TTATTCCAGCAAAGAGAAATGATAATACTTTATCTTTTCATGTTAATCACCCCGCTTTAAGTTTACTTCCACGGTTTAATC  
CCTGAACTAATGCTGATGCAGAACGACTTCCTGCATTAAAGAATGGATTTGGCATTGCTGGCAAATCCATTGGTGAAA  
GATCGGAGTCCTGATGCTCGCATAAAACCAGATGCAACCTTACCTCCAAAGCCATTAGCGGCTGATGTAAGGCCATTTAT  
ACCTACCCACCTGTTAATGTAGAACAGAGTGTGCCAACTTGTTCTATAAGGAATATGGAAATAATAGTAATAAGGAAAA  
AGTAACTACAATAGATAGTTTTATATCTCCATTAAACAGGGACAACCTGATTCAACGAACTAATTAAGAACTAAATGAT  
ATGCTATAGAATAAATTTAACAGTATATAGTTGAGACAACCTGCCGACCCATGCAGTAAACATATTTCTGGTCGATGAAAA  
TAGAGCGAAACAAATGAATAAAATGCCAGCGGAAAGAAGAATTCCAACCATGAAAGTTGATAGTGTCAAGAAAACAGTA  
G  
TGTAATAGATGAGAAGCATTCCGCCGATATAGCCAATCCCCCATACTAGATAAAACCCCATTTTTCTCAGCAATTTGGAAC  
TTTCCATAAATACTCATACTTGTATCAAGGAAGTTGTTTAAATTCGTAGATAGAGCGTTCACAAATTATCAACACTGGT  
TGCAGTTCCTGAACCTCCAGTAACAGCAGCAGAAAGGTTCGGAGCCAGCGTGCATTACAAAAGGAATAACAACTGGCTGT  
AATAAGGCGCTGAATAAGTGAATGCACCAACCAGGGCGAATGCACCGATATTCTTCGTCACCTCGTTCATAAGGATGTCA  
CGTTGGGCATACGTGATTTTCATATATTAGATAAATAACGTATAAGGCTATAGCCGCAAAAAATGTAGGAGATATTGCCTG  
TGCGACCTTAGCGGCGTTCGTCGCCGCTGTGGATTCAACAATGGTTGTTACTTTCTCAAGAAATTCTGAAACAATGTTCA  
TAGCTTAGTCCTTCTGGCAGATGAAGAGTTCACCAGAGGCACTAATATTTGGCTTCAGCTTAATTACCAGGTCTGTGCCG  
AAAAAAATTGCTTCTCCAATTTTTTGGAAATTTAATGTGGATTCTTCTTTATTGTAACATAAACGTTGTGGGTCGCTGT  
CGATGTTTTGGTTTTACGTGGTGTAACGCTTTTTTAATGATGTAATCGAGAGCGTGGCTGTTATGAGATGGTAAAGTGA  
TTAAATCGTCGTTTTTTTTTCATAATGTAGTTCTGATTTTTGAGGTTGAAGATAATTGTCGGTCAATGCTTTTGATTTTTT  
TTCGTATCTCAATTGGATTTCGCTCAGATAAGTTAGCAATGGATAAAGCCAGTTCGATTTGTAAAATTTTCCTTGTTTCG

ATGAGATTGATTTTTACTTGTGGTATATCACGGAAGACACCACAGCCGGTAATTGCTTTTGAAACGACACGTTCTGTATT  
CGCTATGCTTTTCTTTACTGTTCGAGGGGGGACATAACGTGCACGGCGAAGTTTCTCAGATTAGCTTTTGCTTGAGTCA  
TATTTGTATGCCATGAATAAATAAATGCTTTCTTCAAAGCCTGAATAAGCATAAACCAGTAATATGGTGGCTAAAGGCAA  
AGAAAAGGTGAAATGAATAACGGCATTTCAGAACTGAACCGGTTAATGTATATAAGACAAACGGTGCTGAAAGTATGAAAG  
CACCCAGCAGGAAAGAAAAAACATTGCACGCCATTTTAAATAAAAAATATTTTTATTAGGTGATGTTTTTTTCTGTACATT  
TCATCGTATCCTTCAGGGGGCTGTCACCTTCTCACGTTGTTGCTTCCATCGCGAGAGCTTCAACAAGTTCATTGATACAA  
GTCCGTTCTGCCGGAACCTCCCGACCTGTAACCGGGTCGAAAACGATATGCTCATTTC AACGTAACGCAGGCGATCGTA  
GATTTTTTGACGAGCTTTTATCTTAATCACGTCCAGCTCTGCATGTTTTAACTTTTCTCGTCTATCGCCGATGAAAAATA  
TTATCCATATGACAGCCATGATAATTGCCGTACAGGGGAGCATGTAGCTTAATACTTTTACAGCCACAGCAAATGTATCT  
TTGGCCCTTCCTGCTGCTGATTCAAGGATAAAAAAAGCTACAGTTATTATTATGACTGTGTATGTCTCGTATTTATTAC  
ACCTCTAATACCAAATTTGCGTAATGTGGCTTTAGTTACAATCTCTGAAAGAGAAACACCTTCATTTGCGTTTCGCATTG  
AATTTTCCTCATACTATTCCTGTGACACTTAACACCATCAATAAAATATGTAATGCAGTAATGTTTTTTAGCGTTTTTTT  
GTAGGCTTCAATAAAATCCTTATCCAGAAGTCTGATAATAAAATACATAGTGCATTCATCGCTGCTCCTGTAAGCGGAA  
TTAACAACGAAAGATGCATGATTTATTCCTTGTTTTCACTCTTGTCTTCGATGGTCATTACTTTAAGAGTTATTCCTTGC  
ATGTCTGTAACAATAACTCTTGTTCCCGCAGGGTAGTTTTTATTGTGTAACGTCTCAACAGGCCAGAATGTATACCAAT  
GAGTAATTGCCCCTTGCCGTTAACAATATCGTCACTGAGCGTAAATTCTTTTCCTTTAAAACGTGAATGCCCTGTGTTCA  
CCAGGAGAGTGTCTAATTTCTTATGTTTTTTGTCATAGAAGAACTTAATTATCGACGCCAGTATGCTGATTGACGCAAAG  
AAACATATATTGGCTTCTTGTGATATCGGAAGAAAAAAGCCATAATGGCGCTTGATAATGCACCAAGACTGATTAAGAG  
TAACCATCCCGTTCCGTTATAATTTCAAGTGCAATACACAGAAGAAACAGTGTAACCATAACATGGCTAATCTCCATG

ATAAAAGGCGGAGAGTGAATAAAGATAATAAAGGTGGTAACAAACGGCTAATACATTAAACAACAGACATAAACCGAAG  
A  
ATATGCCATTCAAACCTCCATATAAGCAGAGGCATCGTTGCTATCATGAGCGTCGAAGATCCCCAGTCTAGCCATCTTGGA  
AATATGGAGTCGATAATATGCTGTAGTCTTTCTCTTTCATTATTATCTCTTGTGATAGAAAGGAGAAAAAACCATGTTGA  
CATGGGAATTATATACAAAATGATAATGATGCATGTATAAGTTTTTCATTTTAATGGCTCACTCAGGAGTTAAGATAAGGA  
CGGTGATTAAAATAATATTGTCACCGTCCGCTATCTTTTTTAAGACAAATATTGTTGAGCCTGTTTCATATCAACTTTGG  
GAGTATCCTGTGATACGTTTTTTAGCAGTTCCTGATACCTGCAACCGAACTCACCAGGCTACTTGAATCAAGCGGCATC  
ATAACCAGTTTACTGTTTGATGCTGTGCCAATTGCCTGGAGTGCTTCAGTGTATTTCTGCGCAATAAAGTAATTAACAGA  
CTGAACATCACCTTCAGCGATTGCATCCGACACCAGTTTTGTGCGCGAGCTTCCGCTTCTGCCTGACGTCGCGTGCTT  
CAGACTGAAGAAATGCTGATTGCCGTTCCCCTTCCGCTTTCAGTATTTGAGACTGTTTTTCCCCTTCTGCCTTCAGAATT  
TCTGACTGGCGTATACCTTCCGCTTCAAGAATCCGGGCACGCTTAGTTCGTTCCGCTTTCATTTGCGCGTTCATCGCTTC  
AGTCAGTTCTTTTGGTGGTTTAACATCCCGAATTTCAATACGTGTGACCTTAATTCCCCACGGGTCAGTCGCATAATCGA  
CAACCGTTAACAGTTTAGAATTGATGCTGTCACGTTGAGAAAGCATATCGTCGAGATTCATTCCACCAACGACAGTTCGG  
ATATTGGTCATAACAAGATTTGAAATAGCTGATGCAAGATTATCGACTTCATAAGCTGCCTTCGCTGCATCAATGACCTG  
GACAAAACAAACAGCATCGATAGTTACGTTTGCATTGTCTTTCGAAATAACTTCCTGTTTAGGAATATCCAGGACGGTTT  
CCATCATGTTGATCCGTTGACCTATGCGGTCCATAAACGGGATCAGGAAGTGAAGACCGGGGGAAAGCGTATGGGTATAT  
TTACCAAAGCGTTCCACTGTCCAGGCATTACCTTGCGGCACGATTTTGACGGCAGATTTAACGAATATCAGCGCGACTAA  
AATTAATAAGAGTAACGGAATAGATGTAACCTATTGGCGTAATTATAGCGTCAATCATGATTAATCCTCTCCCCATTATC  
ACAATATGCTTCAACCGGAGTTTTTCTGCTTCATAATCACCGCGCCATGCTTCCGCATCGGCGGCATTTCCACCGCGTA  
ACTCTGCGTAATCCATTAATAGCTCGTGCCATTCTTCAAATGTTACGGTTTGTTTAGTGGAACCAAAATCAGCCATATGT

ATTCCTGCATTTTGTGGAGGTATCTCTTTGCAAATGAAATCTGAAATATGAACATCAACAGAAAAACACTTTCCTGCTT  
CTTTTCTTTTGAGAAGTTTTTCTGCATTCTTCAGCGGTCATAGGGAAGTCGCTGTAATGAGTCCATTTACAGGGGCCA  
CCACCTGGTTTTTTGATGGTTGCGTTTATTTGGTACTTAGGCATTCAAAAATACCTCCACTCGATCACCTGTCTTTCTTG  
AACACATCCAGCGGCGCAGTTCTGTAAAACTATCCTGGATCTCACAACGGGTACTTTTCATTGTGACAGTTGGTATATTG  
TCGTAGCTGGCATATGCAATCTCTTTTTTGGGTGTGCGCAATATGCCTTTGTCAATATCAAGAATCCTGAACGCGCTAAT  
TCTTCTTTTGTGCTCGTTAAATAGTGTTTCGTTTAGTTGCTGTTATCTGCTTCTGTGCTTCCTGGTAAATGTAGGTAAGCA  
CATCATAAGATTGTTGCTGTGTAATAAGGAAATTACGGCTAACATCCGTTGTTGTGAGCGTTTTATTATTTCTTAATCCC  
CAATAGGCCACGATGATATAGAGTGGATATCCTTTCAAATCTGCCACACATTCAGGAATGACAGGATTAATTTTAACTT  
ACGCGCCATATTTTCTCCCGGTTGTTTGTCTGAAATAGAAACATCCCCGGAATACAGCGTCATAAGCTAATTATGAAAAG  
TTGCAGCCACTCACTACAGGCTCTTTATCTGATTGTTTCATCATCATGCATAGCTAAACCCCTTACCTGGAGTGGAGACT  
GGCAAATCTGGTGTACTTCTGCGTTGCAGCCTGTACGACTTGCTCAGGGAGAGAGTGAGTGAGATTAACCAACGCGAGT  
TCACCAAATAAGGGGGTTTAAGTATGCAGAATGATATTTGCGGATAAAGAGTCGTTACCTGTGTAGATGGCGCGGCACGT  
CACTCTGTTACGTAGCCCGTTGCTGACAGATGCCAGCGGTGCTTGAAATGCACGAATAATAACCTCCTTATGCCAGGGCT  
TTAGGCAATGACCGCTGTCCGGGGTTGTTAAAGAGCATGAGATGACAAGCGTTCTAACGGGCGTCAAAGAGTGCTCATTT  
TCCAGGCAATGAGCACAAAAACGCGATGAACGAGCTTTTTACAATCATCTGGATAGTATTGTGTGTGCGACATTTAAAA  
CCTGTCAATGCCACAAGAGCGATCTAATGATCTGGATAACATCTAAAAAACAGAATAATATTCTGTTTGTAAATGATGT  
ACGATCTAAAAATCTAGATAATACTGTTTGTGTGGTTTATTCGATCGTGTGAGTGGGTGTATGCAGTCAAAAAAACTTTT  
TTTGAATATACAAAATTCTGAATTTCTGATTTTGTAAAGTTTTGTATGGGGAACGTCAGTAAAGAAGGGGCTTCAGTAGC  
TGTTCTGAAAACGATTTTGAAGCAGTCAGAGATGTGTGCTGAATCAAAAAGGAAACGAGCCAGGCTTGAACATCGTTGAT

CGATTGCGCCCATGCTGCTAAATTTGCAGGCAAGTTTTCCGCGATTTGTAAATGCAGAAAACGAGGTGCTGAAATTTTGT  
TCAAGAACGTAAATTTTTCAGATAAAGAAAACCCCCGTAATCTCGTGTTTTCCAGGCAGCGAAGATTAGCGGGGGCTGACAT  
CAAGGCAGAGCCTTGAGCTTATTTATTTTCAGGTATGCTTGTTACCTGAAATGGAGTTTAATTCCATGAGAAGGAAATATC  
AACTCTTACAGTGCAAGCTAAGTGCAGCTTGCTGTGATTAGCAAACGTCACCTGGTCTGAACTATCACCGGAAGAGCAGGT  
CCGTTTCTGGCAGGACTACGAAGCGGGAATTGAAAGCTCATTCTGGTCCCCCAGGAAAACAAAGGCGGAACAACAAAAC  
GTCGCCGGGGTGAACATTCCACTAAGCCAAAGTGTGAGAATCCAGCCTGGTTCCGTCCCGACAGCTATAAGGCGCTGGGC  
GGACAGTTGGGCCACGCTTACAATCGTCTCGTTAAAAAAGACCCGGTAACTGGTCAGTACACACTCAGAATGCACATGTC  
GTTGCATCCATTTTATGTGCTGAAACGTCAGAGTGTGGTCGCAAATATAAGTTCCGACCGGAAAAACAGCGGCTGCTCG  
ACGCAATATGGGTTGTACTTGTGAGTTTTTGTGATCGTGGATTGCACACTGTCGGCATGTCTGTCTCCCGCCTGGCAGAA  
GAAATAAGTCCAAAAGACAGTAAGGGAAACGTTATTCCTGAAACCGCAGTCACAGTATCGCGCCTTTCCCGTCTGCTGGC  
AGAGCAGGTTTGCTTTGGCACGTTGGGAACGTCAGAAAAGACGATATGGGATCGTGAATCCCGCCAGCGACTGCCGAAAT  
ACGTCTGGATCACCGAAACTGGCTGGAAAATGCTGGGAGTTGATCTGGTGAACTTCAGGAACAGCAACGTAAACGCCTT  
GCAGAAAGTGAAATCCGTCTGCAACTGATTAAAGAAGGCGTTATCCGCGAGGGCGAGGAAATCTCTGTTCACTCGGCTCG  
TAAACGCTGGTATGCGCAGCGTTCTCTCGATGCCATCAAGTCCGACGAGAGAAAAGCAGCAAAGCGCAAACGTGCCAATC  
GCCTTGCAAAACTGCCGTATGATGAACAGCGAAACGAAATTGCACGGTTTATTCTGAAACGTATGCCGCCGGACGAAGCG  
TACTGGTGCACTAAAGAAAGATTAGAGCAACTGGTAGCCAGGGATCTACGTCAGCTTGAACCTGGCCCTGACAGCTTCGCC  
ACCCCACTAGTTTAGCTGCCTGATACAATCGGCACTCTCTTCAGCCCCTTCGGGGCTTTTCGTGTTGCCTGCATTTTCATG  
AAATTCCTCATTTTTGACGACCGTTTTTCATTTGTCCCGCTCTGACAGTTTTTTGATGGCCACAATCGGGTATCGGAGC  
TAAACCGCCTTCGGTTATTAACAAAAACCCGCAAACGAATAACTTCAGAAAGCAGCAAACGTAGAAAGATCAAACCCGCAA

TATATTCTTAACCCCTGTTCTTTAATCCCCTGCGTTGCTTCGCCGCAGGGAAAATATTTATCTTTGAAACAACCTGTGGAT  
AATTACAAAAATGCCTTCGCTTGCAGCGGCTAACGCCGCGCCGCTCAGAATATAAAAAGTACCTCCCACCGCTTCGCGGCG  
GGCATATGGACTTCTGCCTAATGAAAAACAAAGCCCCCTCCAACCCTCCTACAAAAAAACGCTGCAAATACTCAGCCACAG  
CGCCCAACCCATCACTGAAAAGCGCCGCGCCGCCCCGCCCCGAAGGGCGGGAACAACATCGCTTTCAATAATGGATGTTGTA  
ACTAAGAAATTACATGGCTGTCAGTCTTCTGGCTGGAAGTACCAAGTACACGCTCGTAAGCGGTCCTGGCGGCCCCGCTAA  
CGCGGAGATACGCCCCGACTGCGGGTAAACCCTTGTCGGGACCACTCCGACCGCGCACAAAAGCTATTTTCATGGCTGAAA  
GCGGGTATGGCTTAGCAGGATGGGGATAGGTAAGGTGAAACCTATCAATCAGTACCGGCTTACGCCGGGCTTCGGCGGTT  
TTACTCCAGTATCATATGTAACAACGGAGTGCCGCCTTCCATGCCGCTGGCGCGGCATCAAAAAAGAAAGCCCCCAATG  
ACGGGGGAAATAGCGTTTTGATCAAAATAATAATGCTAGTGTGCTTCTTGCGTGCCATTCCAGGCACAACTAAATTTAA  
CGTTTCGTAACTACAAAGAAATCCGATGAGTTAATCACTTGCGAAATAAAAATCATATAGTAAATTACTATATGATTTT  
GCGTTGTTTCGGAGAATTAAAAAATGCCTTTGATTGAATACATCAACAAGTTCTATCGGGGGAATCAGGCATCGTTCGCC  
AGGCTGACCGGAGTTCAACCTGCGCAGGTAACACAGTGGATCAACAAAGGATTCATCGTGGTGAATCACACACTGTATAG  
TCCACGCCGAAAGCTGGGAATTTAATTCCTGGTCAATATTTGACATCCTCCACGCCCTGAAGGACGGGGATATAAGGCGC  
ACTGTATCCTGTTGTCTGGCAGAAAAAAGAAAGCCCCGTAGTTAATTTTTTCATTAACCCACGAGGCGATCCCAATACTTC  
AACAACACCAGGATAGACTTTTACCGCCCTTTACGCAATACCATGTATTTTCAAGTTTCTGGTCGATATATAATGTTGTT  
GGCGCTTGAGGCTTTCTGCCTCATGGCGAAAAGGTGGTTTGTATCTTGTTGTGCGGCAGAAAGAAGAAAGCCCCGTAGTT  
AATTTTTTCATTAACCCACGAGGCGATCCCAATGCTTGAACAACATCAGGATAGCCTCTTACCGCGCGTTACGCAAGGAGA  
AGAAGGCCATGAAACAGCCGAAAAACGCCCTGACCTGGTGTATTATAATCGTGTGCTGCACATTGTTAATATTCACGTAT  
CTGACCCGGAATCGTTTGTGCGAGGTCCGGCTGAAAGACGGAGACAGGGAGGTTACGGCAAGTCTGGCTTACGAATCCAA

CGGTAAGTAGCAACCCGGAGGCGGGCGAAAGCCCGCCTTTTTGGGGATGATGTGGTTCTGGCATTAAAGCGCCTTTACAAA  
GGGGGTATTCTGTACGGATACCCCCTTTTTCCATGTATTTTCAGGATATTAAGTGGTGAATATGGTATAATTAGTCAATA  
TGACAGCAATTATTGAGGCGAGTATGCAGCCCCAAAAAACACCCGTGATTGTGGTCAAAAAACGCCGCGTTCTGGTCATG  
CCAGAAAATCCTGTGGTGAATGAAAAGCCGCAGGAAGTACAAAAATCAGCAGTTAATGAAAACAAGAAAGTACAGAAGA  
A  
AGATGCTGTAGCAGAGAAAACACGTAAAAAGCAGCCTCAGCCCTGGTATTTGAAAAAACAAATCACTTTTCCCCCAAAT  
ATCCGAAAGAATATTTTGAAAAGTGTTTCAATAAAGTTCGTGCTGTTTTTCTGAACTATGGACAGACGAAAAAAGAAC  
TTGCCCTGAAAAGCGGGATTCTCCAGGACGTTGAGAAATACCTGGCGGATAACCCGGATGTGGATCTGACGATTGAAGA  
GTGGAATTGTGCGGTTCAAGGTGATGACGTTCCGGTGGCAATATCTTCAGAATTGTACTGTACCAGGCGCAACACGTTACG  
ACCTTTACGGGAAACCTGCTGGTACAGTAAAAAAAGCACACGCAACTTATGCGCAACTGGTTCTCGATGCCCGTAAGAAA  
GCCAGCGAGAAGAAACAATTAAAACGTAAGGGATAAAGCCCCGAAGGGCTTTATCATTTACGCCTGGCTGACTGTAGAAT  
CCAGTGATTTTTTCCGTTTTTCGTCCAGGCCGTGTTCTGTAAGCTGCAAGAGCCGCTTTCATTATTGCTGTTTTTGTCTGGC  
CTGTTTCGCAGTGCTTCCCGTTCCAGAATATCTTCGTAAACGTCCCCAAGCCGGACATTGGTCACTTTAGTTGCTCCCGAT  
TTTTTGCGGGTAGCTTCATTGATGAATCGGGCTGTGTCTGCATTGGTTTGTTCTGTTTTTGTCTGCTGGTATTACCGGAGT  
TTTCAAGTCAAGAGCCATTATATCACCTTTCGTGTGTTACATTAGCTTTACTGTGTAAAGCTAATGATGTAAAGCGATCG  
TATTACATCCATTAGGGATTGATGCCTAACTCTTGCGCCAAAAGCTCTATTTGTGCTTTAGCTGTAGAAAGGCTGGATGC  
GCGACGTACATCATGAACGCCAGCGCCTTCATTACAGGCCGCTTCAAAAATATCTAAATCTGAAATACGTGTACGAAGTG  
GCTGTATCCACACCGGGTTCTCCCGGAGTAACTTGTCGAGATCAATCGCTGCTTTTCTGTGGCGTGGTTTTGTCTGTGTTA  
ATTCTCGTGAAAAGTACCCAGGGTTGCAGGTCTGGATTGATCTGTTGAGCTGTGCGAACTTTTTCTGTTACATGAGTCAG  
CGTTTCTGCTTCGAAATCTGAAGACGGCTTAACGAGAGTAAGCAGAGTGTGAGCTACAGTTAAGGCGCTGCGAAATTCCT

TGCTGTCATGACCTGGACAGTCAATGATCAGCACTTCACATATTTTTTTCAGGCGCTTAATGACTTCTGATACATCGCCA  
TACTCTTCATAAACAGGAACCGGTAATAAGCCATTCTGCTTTCTTTTTTCGTTCCAGCTAAGAATATCATTGTTTTATC  
GGTCTTCAGAATGATGACCGTTCGTGAATTATTTACCAGATAAGAAGCCAGGTTTGTTGCTGTGGTGCTTTTTCTACAC  
CGCCTTTATCTGATGCGACAAGTAATGCTCTCCCATAGAAACCTCGGATATACAGTGTAAGGTTTATTTGTCTTTACA  
TTGTATTCAATTATAGTTACGTTGTAAAGATGTTTGTGTCTTTACAATGTAATTGCTTTTGTGCTTTACATTGTGTGTATG  
TTACAGGGTAACTTTTCAGGATGCGATTTTGCCTAGTGTGTTGTTGCGCCCGTAGCTCGCTGACGCTCACACGCGCAGTA  
CAGCGCCCCGCCCTGCTGCAATGCACCAGGACGGCGTAACTCGCTGGCGCTCGCGCTAACTGCGGCATTCTGCGGCGCA  
AATCAGCATTATCATGGCCTGTTGGTCTGTCTGGCTTTGCAGGGCGAAGGGATGGCCCTGTGCATCCTGGTATGTTCTG  
CAGCGGCTGCGCCGCGCTTCGGGGCGATGTGGCCCCGCTGCTCCCTGGTATTTTCTTCGCCCCCTTCTATCCGCTGGCGC  
GGATTAATAAATGAGCAAACCATCAAATAACTTGCTGTTTTTCAGGCAATAAATCTTGATAATACATCTAAATAGATGTAT  
TATTGTTTCATCGAAAGGGGATTGGCTCCTTTCCTTCTTAAGTCCAAACGGACAGGAGATTTAAATGAAAACATTGACT  
TTAATAACGGCACTGTTTCTGTTGGCGATGTGTTTGTATCTTCCTGGGGATATGAGCAAACGAACGTTAATTTCTACCA  
GGTTATTTCTGTTTCATGGCAAAAAACAGTAACTGTTTCAGGAGATTCGCGCTTCAGTTCATCGGACTCATTCAATGAGCG  
GATATAAGACTCCATTACTTAATGATTTCTGTGGTGAGCCATTAAAACGGCGAGTGCGTGATTATTACAGTTCGCCAGCA  
ATTGAAATTGAGGAATTCGAAACAGCATATAAAGGATCACCGGAAGAAAAACACGAGTTCACATCATACTACTAAGAAAA  
TAGTTGCAGGGGGTATCCCCTGCAACCATGTTAAAAATGTTAATAGTAGTATTTACCCAGGGGGTTTTAGTATGAATGAT  
GGGGTAAACTCCGTCCTTCAGGGCGTGGAATGCCGGGCTAATGCAGCAATGTAATGTTGCGCCCGTAGCTCGCTGAC  
GCTCACACACGCAGTACAGCGCCGCGCTTCGGGGCGATGTGGCCCCGCTGTTCCCTGGTATTTCTTTTCGCCCCCTTCTAT  
CCGCTGACGCGGATTAAGAAACGAGCAAATCATCAAGTAAATTGCTGTTTTTCAGGAAATAAATCTTGATAATACATCTAA



ATAGATGTATTATTGTTTCATCGAAAGGGGATTGGCTCCTTTCCTTCTTAAGTCCAAACGGACAGGAGATTTAAAATGAA  
TATCCAGGAAGCATTAAACGTTTTTGGATTATCCGGCGAATTAAGTAAAAAGATATCAAAGCAGCATAACAGAAAAGCCG  
CTTTAAAATATCATCCAGATCGTAACCCGTTAGGGGCTGAACTGATGAAAGCGGTAAATGCAGCTTTTGATGTCTTGATG  
GCAAATATTGATAAAATAAATCAGTTCAGAGCGCTGATGAACATGCACGATATAATTACGGTGATGACCTGGAAAAAGT  
ATTAAACGTTCTTTCTGGTTTATCTGGTCTGGTATTTGAAGTGATAGGTAAGTGGGTATGGATTAGTGGAGAACTATTA  
CACATAAGGAACTTTAAAAGAAATCGGGTGTAATGGGCGGCAAAGAAAAACAATGGTTTTATCGTCCAGACGAACAT  
AAAAGTTACTGGAATCGTGAAGAACACACGATAGAAGAAATCCGCGCAAATACGGTACAACCGGACAGCGCAGGGCGA  
C  
AGGGTGGCAACGCGTGGAACCAGAGCGTAACCAGAACGGGGGCGAGAAGCCCCGATATCATACCAGCCCGTCTTTTGG  
GGCATCGAACCCTAAAAAGACGGGAACAGCAGCCACGTAGCAAAAAGGGAAACAGATGAACTCTTTTTTTGAACAGTATCA  
CCCTGTCTTTGAAGTTGTCTGCCGTATCCTGGGGAACGGCTGGCGCGTGAACAACTTGATGATTGTCCGTCTCGTATAA  
AACTGACGTCACCGCAGTTTAAAAATTACTCTGTGCATATTCGGATGGAAAAAGACCGATTTTCTGTTGTGGGGAGTGTG  
GATAGTCGTTCCCTGGAGTAGTCCGTATCATGTTTGTACGTTATCCAGGAAGCGGAATCCCGTTGATATAGCAGCCAATAT  
CGAACGAAAAATTTTGCTAAATGCTTCGCAGGAGGTGTTACAGGCGATTGAGTATGAGAAACGCCAGGCGGCAAAAAAGG  
ACGAAATTCTGATCCTGAAAGGTATGTTATCGCAACTTGTCCAGCTTGAAAGCTGGTATGGGGCATTGACAGGCTTTAAA  
GCTGAAAATGGATTGAACGGTAAAGTCACCGAGCAGGGCGAGCGTTATGATTTGCAGATTAGGGGTTTGAGTATAGATCA  
ACTTGTTAAAATTACAGGATATTTGAAACAGTTATGAGAAAAACAAAGGGCGATTGACTTATTATCTTGAAGTGATTGA  
TAAAAAATACCATTTTGTAAAAAAAATAAGCAGTTATTCAAAGGAGTTCACTGACGGAAAAACAAAAAGAACAAGAGA  
A  
CGTTAAGTGAGCTGGTTTTTAATGAAAGTGAGGTCGAGGCAATAGACTTTACAAAAAATGGTTTAAGACCTGTTGATAAG

AATATTCTCTTAACTATGGTGAAAGAATATAAGGAGAGTGATGCATGACTATTGAAAATACACCGGAAAACATAAAGAAA  
TTACGAAAAAAAATTGGCCTTACCCAGACAGAGTGCGGTGAGATTTTTGGCGTAGGCTTAAGTACATGGCAGAAAAAAGA  
AGCTAAAACCCACAACCAGCTTAATTTATCGAAAGGTGAATTTGAGTACCTGTTATTACTTGCAGGGGAGCACCTGAAT  
ACGTCCTGCATAAAAAAGCTGAATCCCGCTCACCGGAGGAACCGTGAGCGAGAAGAAAAACACCACGACGCAGAAATCT  
A  
AGATATACAGTGTAAGGTTTATTTGTCTTTACATTGTAATTGTTCTTTGTCTTTACACAGTGTGTGTTTGTAACAGGGC  
GACTTTACATAATTGCGATTTTGCTGGTGTGTTGTTGCGCCCGTAGCTCGCTGACGCTCACACGCGCAGTACAGCGCCC  
CGCCCTGCTGCAATGCACCAGGACGGCGTGAAGTTCGCTGGCGCTCGCGCTAACTGCGGCATTCTGCGGCGCAAATCAGCA  
TGATCATAGCCTGTTGGTCTGTTCTGGCTTTGCAGGGCGAAGGGATGGCCCTGTGCATCCTGGTATGTTTCGTCAGCGGCT  
GCGCCGCGCTTCGGGGCGATGTGGCCCCGCTGCTCCCTGGTATTTTTTTTCGCCCTTCTATCCGCTGGCGCGGATTAAA  
AAATGAGCAAACCATCAAATAACTTGCTGTTTTTCAGGCAATAAATCTTGATAATACATCTAAATAGATGTATTATTATT  
CATCGAAAGGGGATTGGCTCCTTTCTTCTTAAGTCCAAACGGACAGGAGATTTAAATGAAATTCATTCAACCACGAA  
TCATGTTTTACATTGGAACGAGTAACGCTTTGCACGATTGTTCTTATTCATAAGGATACGGGACAACAGTATGTTGTCA  
TATTTACGGATAACAATAAAATTCGTGACTATAAGACCGGAATTGTTTCTCAGTTTGGTGAACCTTAAGCAGAGTGATATT  
GATTTAATTCTTTTCTATCGGGACGAATATGAAAAATATTTTGACTCGTTAAATAATGGCGAGGAGTATTTGAGTTTTAA  
AGAATATATCGGATGTATAAGGGGAAAATAAATTATGAAAGGTGTGTTTCAAGTTGCTGGAACAACCTGAACACGTTATCG  
ACAATCAAACTGAATGAGGTTTTTAAATGTCAACACGACAGATCGTACAGCTTGCTGACTCCCTTGTCAAAGGCTGGGA  
AACCAGAATTCGGGCAATGACGTGCACGGAGTGGGATCAATTCCGGTGGTGGTTAACTACCTGCAAGGGTATGAAATGT  
TTTAAATAACCGGGATAAATTCATATATGGGGAGAGTGTCATGCTCTCCCTTTCTTATTGGGTAGCGAGTTGTATTACAT  
ATTTAGCTTTACGTTGTAAAGATTTTATTGTCTTTACAGTGTGGTGTGTTTTCCGGCGGTTGCGCTGCGCTTAGGGGTAT

GTGGCTTCGCTGCTCCCTGGTATTTTCTTTCACCCTCCTATTTGTCCGATGACTTTTGACAACAACGCTATTTGTAAC  
TAATTAGTTGCATGTTGGCAAGGGATGGGATTATAGCGTATGGGGAAAGCAGATAAGCTACTGGCAAAATTTTTAAACAG  
TAAAAAACGTTTGAATGGGATGAACTCGTTGTTTTGTTTTCTTCTCTAGGATATGTCAAAAAGGAAATGCAGGGATCAA  
GAGTGCGATTTTTCAATGCTGAAATTAATCACACAATATTAATGCATCGCCACATCCAGAAAGTTATATTAAAGGTGGA  
ACGCTGAAAGCTATTAAACAGAACTTGAAAGAGGCTGGGGTTTTATGAAACATTTAAAATATAAAGGATATTTAGGTACG  
GTTGAGCCGGATTTTGAAAATAATATCCTGTATGGAAAGCTGGCATTATTCGTGATCTGGTGACTTATGAGGCAGAAAC  
ATTGGCTGACCTGGAACGGGAATTTAAACATCGGTTGATTTGTATTTACAGTCCTGTGTGGAGGACGGAAAGGAGCCTG  
ACACGCCCTTTAAAGGTGTGTTTAACGTCAGGCTTGATCCAGAGCTGCATCGTCGGGTCGCTGAAATGGCGATGGAAGAA  
GATTTGTCGCTGAATGCCTTTGTCAATAAGGCACTGGAAAAAGAAGTCAGTCATCATCGCGCAGGGGCTTAATCGCCCCCT  
TTTTGTTGCTCGCAGGCGTTGATGTTTCTTGGTATTACGGTGTAGTGTGTTGTATTTACAAACAATGCTTTACGGTGTAT  
TACGATGCATACTCTTTAATTGCTTGCAATCTCTTTTCACGTTTCGTTGCTTTGTTTCAGCTTTTTTCAATTCCTGAATAT  
GTACTCTTCATCTTTACCCGTGAGTTTTGAACCGGAGAGCAAGCGATTAACAACCTTTACGTCGAATTGCAGGGTAATCTT  
TGGTTTTATCGAGTATGGACAATATGCGGTCCTACTAAGAATCTGGCCTTTCCCTGATTCCACATAATGTAGAAAAAAT  
GCGATTGCGGACACGCCCAAAGCACTGTAAGGACGGCTACACCATCAAGACGAACTTTGATATAAAGGAATACGCGAC  
CACTCCAATAATTGCTAAGCAGAGACATAAATAAATTAAGAGGTTTTTGTGCGTTGTTTTTTTTGTGCGCGATCATGAT  
CATCTATGATTGCCAGTATCTTTTCTGGAGTTGCTTGAGCCATTTTTTTTCTTATCAGGGAGACGGAGTGTTCAATCAT  
CTGGCTTTACAATGTAAAGCTATGTTTGTCTTTACGGTGTAAATAATGAGATGTGCAGTTAAAAGTGTCAATCAGGTATC  
ATATAGTAAACACTATATGATTTTTCTGTAATAGGCTTAAAAAATTCTCGCTTACATTGTAAAGGTCTTTGTGTCTTTA  
CAGTGCACCACGTTGTAAATCACTGCCTTCTGTGGAGATAATCATGTTTTTTTCTGTTGGTGTGCGAAACACCGAAAGATG

ATCAGACTGCATACGGCATCACTGTTCCGGCTTTTGATTGTTTTGGTTTTGGATGTGTTTCTGCGGCTGATTCTCAGGCA  
GAAATACCCGCTATGGCGCGTGAAGCGATATTGGCAATCGTGGAAGATATGGTATTAAGCGGTGCTTATTCTGTTGATGA  
TATTCATGATGAAGGGTGTGTTGACTTATTCGGATCACTCCAATTATAAGCACTGTGATAGCTGGTTTTTGGTTGATGTCG  
ATTTAACATTAGACATGCCGTAGTCCGGCTATCGGGTCATGAGGACGCTGAAGAATATCGCAGGCATATATTTACAGTGT  
AAAGGTGTTTTCTGTCTTTACATTGTAAGGCTTATTGAATACTACACTGTAGTGCAATGTATGTGTTTTTATGACCTATCC  
CCGCGTTGTGCGGGGATTTTTTTTTGATAGCTAACCGCTCGCCGCAGTCTAGCGACCGAGCATAGCGAGCGAGTGACGAGG  
AAGCGGAAGATCCACCGTTGCCAGGAGAAAAGCAGGTACGCACTATGCATTCTGCCCTAGTGATGCTTTCACAAACCACG  
CGGCTGAACTATTACGCCATGAATCCAGCGCAAATCGGCATCACGATTTTCTTTTTTCATTTTTTCGCCACTTAAAGCC  
TTGCTTACGTGACTTTTTACCAGATTTTCGTGTAATTCCTTTTGCTTCTTCAATTGTGAAACCACCAGGCAAATTTGGCGC  
TTCTGCTTCCAGTGATGCCAGAGCAATTCATAAGCCCGGCGCTCAATATTGTCTCGCACGTCCAGGCTGCCGATTCGCT  
CCCTGATTTCTTTAATTAGTTTCTTGTCGTCGTCGGTAAATGTTGTCATCTCACTCTCCTTTGGCGTCAATGTTTACAGC  
CTGGCAAGCCTCTTTGAGCACCCAGTCAATAGCGTCTTTCCATGCCCCTGTTTCGACGGGAGGATTCGTGTGCTTTACCT  
GATCGTAGAAGCGTACTGCGTTTACCAGTCCTCTTGTTGGTGCTGCTATCGCAGGTGGTAAGTTGTAGAGTTCCTGAATT  
TCATAGTTCGGCCTGTCGTTGCAGTCTTCTTTTGTGCGGCACGTATTTCCAGTCACCAACCCACGTTTTACCCTGAGAGTC  
CGTAACGTCTTTTTTCACGTAACGATACCTCCATGCAACAACCCAGCTTCCAGCGATGCCAGTGCGATTTTCATAAGCCC  
GGCGTTCAATATTGTCTCGCACGTCCAAGCTGCCGATTCGCTCTCTGATTTCTTTAATCAGTCCCTTGTCGTCGTCGGTA  
AAAGTTGTCATTAGTGACTCCTTTTCATATCTATGGTTTTCTTGAATCAATTCGTCTAGTTTGAGTTTTATATTTTGCT  
GGTCTGATTTTGGTAATTTTCTCATGCTCTCTTCAGTTATTTTTTTCATATCAAGAAAAGCTCTTGCATAGAAGCGCAGG  
CTTGCCTCTTTTTCATGTTGTGCAACATAACCAGGTTGCGCCAGAAAATGCCGCAGACAGGCATAATGTGCACAAGGCACA

AATTGCAATGGCTGTTCTTGTACTGAAGGGTTTTACAGCCTTAGATAATGACTTCAACTTTTCTTCATATAATTTGTTGT  
TTTTTTCCTGGTTGCGTTTAATTCCAGATATGAGTTCAATAATATCATCTGTTAATTTTCTTTTACCTCAACACTTGTT  
TCTTTTAGATCGTTTTTTCCCTCTTCTACTTTTTCTTTTATTTCAATTATCCAGATCGCCGCACGTCTCAACAATATTCTT  
GAATCTTTGAATATAGTCATTTTCTACAGATGAAACGACCTGTCTGAAGCCCTCAGACAGGGCAGTGAAGTTAGCTTGTA  
ACTCATTGCTGAATTTTTCTGTATCTTTTGGTTCAGAAAAATTAATGAAATAACTGGATCATCTTTTGATATTTTATGC  
CCTGTCTCCTTGAATACATCAACAATAAAATTATCAATATCTTCACTGGAAACAGCCTTTTCAGGCTGTTTTAATTCTGG  
CTGATTAAGTGTACTCATATTATTCACCGTGTTTCATCGTCATAGATGCTATCTAATTGTTTGTAATGTCATTGAAGACT  
CGTTTTAATCGTGATTTAGCCATTAATCCAAAATGGTCGGACTCAAGAGCTTCTTTCAGTGTTAGTGATTTTTCTGTTAG  
CTCTTTGATGTCAGAGGCCAAAGGCATCACTTTTTCTGTCTGAATAACCACAACGCCAGCGATTACATCCTTGTTTTTTT  
CAATGAATTTAGTTTCTATTAATGGGATATTTTCAAGTGCTGGAATACCCTGAAATTCATTTATCCAGACAATAAGTTTT  
ACCTTACTTCCTTTAACCAGTTCTTTCAGTTCTTCAAATCCCTGCAAGGTATCCGCAAGAGCTTGTCCACCAACGATAAC  
AGTATGGATATAAACGTCTTGTTCTACATCTTCAAACATGTCCATAACACAGTTATCATTGAAATACTGAATTAACGGTA  
AAAATGTAGATGCGCCATTGTCAATAACAAAAGTATTCTGACTATTGGTCAGCATTGATTCGAACATTGGATCGAATTTG  
GATTGTATTACTTTGCTGTTTTTCAGTGATTTGTATCAAATCTGCATTTAATCTTTTTACTTTAACCGTAGTTGTATTAAC  
CGGGTCTGTGTCACCGACTACGATATTATCCATGTGATTTTCATCAATAAAGTATTGTGCCAGTATTGCGGTCGCGAATG  
ATTTTCCAACACCACCTTTACCCTGAAGGATGAAATTGATTGAGTTTTTCATTTATAATGCTCCTTTACTTAAAGATATT  
TATTTATGAATTTTTCATTCGTAGCACTTGGATCGTGCTCTATTTCTTTTTTGTCTCTACTAATGTTTGAAAAAAACCT  
TTTACCCCCCTCTCGGTTTCATCGCCTTTAGCTTCATTCTGATCAATTACATCTATGGTTTTTGCCTGTTCTTTTGGTTC  
AGTGCATTTTTGTCTTTTTTTAGCCCTCTCTGTCATATTTATATAAGTCTTTTGGGCTAGTTCTGTCTTGGTGTTGTTGT

TTATGTAATCAGCTATTTGCTCCCATGTATAATATTTCTTTGCTTCAAGTATATTTTGCAAATACATATTGAAGACAGCC  
TGTTTTGATTTTCGATTTTGTTCGTTTATAGCCTCGCATATTGGAGATAATAAACTCTCGATCTTTTTCATTTGTTACAT  
TTCCTCTCTCTCTACCTCCTACATTGGCATAATACCTTATTTAAAGCAATTTGCTCGCCGTTTGTGTGGGTGATTATG  
TGGGTTGTTTTGTGGGTTGTCAATGGGGGTGTGGTCTTTTTTGTGGGTAAAGTGTGGGTGATTATGTGGGTTGTGTGTT  
TTTGGTTGTGGGTTATTATGTGAGTCATTGTGTGGGCTGTATGCACGGCATTTTTTTGTTCCTTCTAAAACACAGGCACGAT  
ACCGATTGTACACAAGACCGTTCGCGTCATGTTACAATCGTGTGCCAAAGGGGGACGCCCCCTTGAAACCCCGAACGATG  
CAGCCGTTCTTATGCGGTTCTACGAACCTTGAGGACATATGAAGAAAAAACCAACAAAAACGTTTCATGTAACATTCAGA  
CTTACCGAAGAAGAATATGCTCCGTTTCGATAGGGCTATAAAAGAGCTTAATATTAGTAAGTCTGAATTTTTCAGGCTGCT  
TACTATTGGTAAAATAAACACATATGCATCTGATAAACGTAACATACCAGAATACAAACGTTGTCTTCTCAGTTGAGTT  
GGGCAGGAAACAACATAAATCAAATAGCGCACCGATTAAATTCAGATCATTTAAAAGGTATTATATCAGAATCGCTTTAT  
AAAAAGGTTTTAAATGGACTAATCGGTATTCGTGATCGCCTTCAGGAGATAGCTAAATGATTGTCAGATACGGTGGTGGT  
AATGATGGTATCGTTGATTATCTGATAAATGGTCGCAAAGCAGAACGCCAGTACACGCGTGATGAACTTGATCATCGTGT  
TGTTCTTGATGGTGATTTACAGACTACAGATAAGATTATTGATTCTATTGAAAACAAAAGTCAGGAACGTTATTTGCACA  
TTACTCTGTCTTTTCATGAAAGTCATGTGTGAATGAAGTGTTAAAGGCTGTTGTTGATGATTATAAAAAATTATTGATG  
AATGCTTATCATCCTGATGAATACTCTTTTTATGCGGAAGCTCATTTGCCTAAAATTCGTCATATCCAGGATAATAGCAC  
TGGTGAACTTGTTGAAAGAAAACCACATATTCATATTGTAATTCCTAAAGTAAATTTGATTACTGAAAAGTTCCTGAATC  
CAGTGGGAGATGTTACCAAAGGGCATAACAATTGAACAGCTTGATGCTATACAGGAATTTATTAATAATAAATATAATCTT  
GATAGCCCTAAAGACTATCCGCGTAAAGATGCGGATTACGGAAAAATTATAAGTAGAGTTAAGGGGGATCTTTACAAAGA  
GCATCACTCTGAATTGAAAGGTGAGTTGCTTTCGCGTATAGAGAACGAGAAAATTGAAAATTACTCTGTATTCAAAGATA

TTGTTGCAGAGTATGGTGAAC TTCGTATAAGAAATGCTGGTAAAACCAATGAGTATCTGGCTGTAAAATTGCCTGGAGAT  
AAAAAATACATAAACTTAAAAAGTCCTCTTTTTTCGTCAGAATTACATTGAGACAAGGACATTAACACTTGAGAAACCAAC  
ACACAAAGAGATAGAAAAGAGACTTAATACCTGGTTAAATAAAAACAAGCCAAGAGATTAAGCATATTTTAAACCAGGCGG  
AGAAAACAAGGGAAC TTTACAAGACATTAAGCCCTTCACAACAAATTGATTTCCTGCAAGAGAGGATAAAAAGAATATGAC  
TCAAGAGAAAAACTTAACGAAAGAAATTCTCAGCAAACGTCAGGACGAGCGGGAGGTTACAAGTCGTGTCCTAAAAAGTT  
TGCCAGAATCCGTCAATCTGAAGCAACAGTCGGATTGTCACGTATGCCCCAACGCGGTATGGTTTACGGAATCAATGGAT  
TCACAAGACCCGACTCTGTCAGTGTATTGTCAGATATTTTCGCAGCGTGATCTGGCAGAGCAATTATCGCAAAGAGAACAT  
CCTGGTCAGGATGTGCGACGGGATTATGATAGACAATTCACAGAGTCAGGAATAAAAAGTCTTGAACGCTCTTCTTTTTT  
GTGTGAAACGATGTTTCAGACTCTGAATGAGGCGGCAGAGAAAAACGAAATTGCAACGATGGCAGAAATTCGCAGAAATA  
TTGATCCTGTCAGGTTTCTGTCTTCTGCCGCCGAGCGTTTTTAATATTATTCCAGCGCAGCATAAAATCAGAACAGCAAAG  
GACGGTTC CCCCCGGTTTTCTGTGGGGAATCGTAATATGAACGCATCTGATTTTCTGACAAAGCATATTAATCTTGCCTG  
GAAAGATGCGAAATCCTTTCTGCTTGAAGTTTATTCACAGCAGTTAGAAAACACGCCATATACGCGCTATCCAACCTACA  
GACGCCTTACGCATCATGAAGCCCGTGAGCGTCTTA ACTCACTGAATTTATCGGAAAAAACATTACGAAATACTATCAGG  
TTTGAGCGTGGCAAGCTGTATAATGATCTGCGAGAGATGAGACGCGAGTTGAAGTTAATACCACGTGAACAGCGTGATAT  
TGCCGTGGGTGTGATTGTTTACAAAAAACTAACCACACTTGAGCGTCTTTCTGAACTCGACACAGAGGGGCGACACATAA  
TTCGTCAATATCATGCTGACTGGCATAAGGATAAAGATGAAATGAAAGCCCTTGAACGTCTCAAAAGCTATCTCAACTTC  
GATGAAATCAACGCCATTTCTGCTGACGAACCCGAAC TTTTCGCTTCAGAAAGCGGTGGATTCCCAGCGCCGCTTAGAAGA  
GGCGAAAAAGGTTA ACTCCAACTAAAAGATCTTGTGATGGATAAGCAGGATTCCAGGATTGTTTATCGCGATCAGGAAT  
CGGAAAAGCCTGTCTTTACCGACAAAGGGAAC TTTGTCTTGCGGGTAAAATCCTTCAAAAGAAGAGATCGGAATAATG

CTTGAGTATTCCAGGGAAAAGTTTGGTGGTGTACTCAAACCTACCGGCTCTGAAGATTTCAAAAAAATGTGCGCTGAAGT  
TGCCGCAGAGCAGGACATGAAGATTATTTTACGCCCCGAGCAGTATCAACAGATGATGCTGGAATTA AAAAGCAGAACTTC  
AGGGTAATAAGTTTGAGCAGGTGGAACACAGGAAAATAGCCAGGAGTCCGAATCCAGAATAGAGAAAGGTGATGCATTG  
AAGGAACAGGCCACCGAACAGGAACAGGCTACAGAGCAGGCACAGGCTACAGAGCAGGCACAGGCTACAGAACAGGCA  
CA  
GGCTACAGAGCAGGCACAGGCTACAGAGCAGGAACAGGCCACCGAACAGGAACAGGTCACCGAACAGGAACAGGCTACC  
G  
AACAGGAACAGGCTACCGAACAGGCACAGGCCACAGAGCAGGCACAGGCCACAGAGCAAGCACAGGTTCGCAGCGCAGG  
CC  
ACATCTTCATATGATCCTGGTGTTATTACCAGGGCAAACACCCTGGATTCACAGATGCTTAGTAAAGGCACAAATGGTGA  
ATTTGGCTATTTGAAATCTCTGGATAGCGATGAAAATGAGATTTGGGAAGTGCTGGGACATGTACCTGGAGACAGCGATG  
ATATTTTTGACGTTGCCAGTTTTGATAATGAAAACGACGCAAAAGAATTTTGCAAAATTGTGAATGAGTTAGGTATTGAC  
AGAACACAGGCTCTGATTCAGGAGCAGCTTACTACTCAACACGATCAGGCTACTGCGCAGGTGCATAATAAACAGGAAAT  
TTATTGTATAAACTTTAGTCGCTTCCATGATTTGAATGAAGGTATCGTCTTTCATTCTAAAGATGCGGCTATTCAGTGTT  
ATGAGGAAAGCAAATCTTCTGCAATAGAAAAATATGAAAGCAATTATTTAAATGGTGATGGTTTTGATACTGTTGTGCTT  
ATGTCTAAAACGTCTCAACCGATGAATTATCCTCTTATCCAGAGGGGGCATTAGTAACGTTTGATAGGCCATTTGAAAT  
AATTGCCAATTCATATGAAGAATACCGTACTCCAGTGTATGCGGTTTCTTTTTCGAAGGATGAGTTTAGTGAAGATATTA  
AGACTTTTGAGTCATTGCACGACGCATCTGAATATAAAAATAAGATGCTTCAGGAGCACGGGCTTAACCAGGATGATATC  
TTAATCACACCTGTAACAAGAGAAGAAATCGCCTTTAAAGGAATTAAGGACGCTGTTAATGACGCTAATATGGCAGTGAT  
GGAACAGGCGGGGGATTTCGTCCAGAGAATCACCAGAAGAGATACTCGCCAGTATTTACGCTAACGAGCATATGATCTCCG



GGCTTGAAAAC TTCCTGGTTAAAGACCGTTCTCAGTTCAGTTCCTGCAATGGGGATATCGTTGTGGAGGCGGAAATTACC  
AGGGGGGAAGGTGGTCTTTATCACCTTGCGGTCGCTGGTAAGCATGGCTTAGAGCGTGGTGATGCAGTTGCCAGAGTGGA  
TGTTACGGAGCAGCAATTTGCCGCGATCACTGGAAAAACACCTTCTGAAGTTTTAACGGGGGACCAAACATCGGCTCGTG  
TTCCGGTAATTACAGGTATCCATTTAGTACAAGGGCTATTGAAAATGTGAATAAACTGGAACAACAGAAGGATTATGTC  
TATTTCTCAACACATGAAGGCCTGAATGCTGAAATAAAAGATTTAGCTCTCTCAAGGATGCTATTGAGTGGGGCCGGGT  
TGAATGCGAGCTACATGATCTCAATAAGCGCGATACTGTCATTTATCGCGTCGAGTCTGAACATATTTCTCAGGGGATTG  
ACGCTGTAATGAAAAATGCTGAACGCGTGGAGCGTCATGAAATTGAGAAAGCACAGGGACGGGATTGCACGCCGGAAGAC  
GGCAAGATTCTTGAGGCAATTGATCGCTTTGAGGACAAGTTCAGAGGGGAAGGACTGAAGTTCGAAAGGGAGAAGGCCGA  
ATCCGATTTGCTTAATCACGGATTCCTCGTGAAATGGCAGAAGATGCTCTTGAAAAACAATTTGTCCAGGCCAGAGAAG  
AACATCTGGAATTGCAGCAACAGCGTGACAATTCACAGGACATGCACTAATTAAGAAAAAAGCCCGGTTTTCGGGCTTTT  
TAAGATACAAATTATAAATACTCTCAAGTGTATATTCAGTATGGGATTGCGCAATGATTGCCTAATAAAATTTCTGAAAT  
ATTTCTGTATCGCATAATTTTTTATATCAGATAAATTGTACTGGATTTCTTAAAAAATTGCAGTATAATTGCCGCAATTA  
TCCCACCGTTTATTTTTTGATTAGTTTCTCATGATGCAGCATACTTCTGTGTGGTACCGACGCTCGGTCAGTCCGTTTGT  
TCTTGTGGCGAGTGTTGCCGTTTTCTTGACCGCGACCGCCAATCTTACCTTTTTTGATAAAATCAGCCAAACCTATCCCA  
TCGCGGACAATCTCGGCTTTGTGCTGACGATCGCTGTCGTGCTCTTTGGCGCGATGCTACTGATCACCACGCTGTTATCA  
TCGTATCGCTATGTGCTAAAGCCTGTGTTGATTTTGCTATTAATCATGGGCGCGGTGACCAGTTATTTTACTGACACTTA  
TGGCACGGTCTATGATACGACCATGCTCCAAAATGCCCTACAGACCGACCAAGCCGAGACCAAGGATCTATTAAACGCAG  
CGTTTATCATGCGTATCATTGGTTTGGGTGTGCTACCAAGTTTGCTTGTGGCTTTTGTTAAGGTGGATTATCCGACTTGG  
GGCAAGGGTTTGATGCGCCGATTGGGCTTGATCGTGGCAAGTCTTGCCTGATTTTACTGCCTGTGGTGGCGTTCAGCAG

TCATTATGCCAGTTTCTTTTCGCGTGCATAAGCCGCTGCGTAGCTATGTCAATCCGATCATGCCAATCTACTCGGTGGGTA  
AGCTTGCCAGTATTGAGTATAAAAAAGCCAGTGCGCCAAAAGATACCATTTATCACGCCAAAGACGCGGTACAAGCAACC  
AAGCCTGATATGCGTAAGCCACGCCTAGTGGTGTTCGTGCTCGGTGAGACGGCACGCGCCGATCATGTCAGCTTCAATGG  
CTATGAGCGCGATACTTTCCACAGCTTGCCAAGATCGATGGCGTGACCAATTTTAGCAATGTCACATCGTGCGGCACAT  
CGACGGCGTATTCTGTGCCGTGTATGTTTCACTATCTGGGCGCGGATGAGTATGATGTCGATACCGCCAAATACCAAGAA  
AATGTGCTGGATACGCTGGATCGCTTGGGCGTAAGTATCTTGTGGCGTGATAATAATTCCGACTCAAAGGCGTGATGGA  
TAAGCTGCCAAAAGCGCAATTTGCCGATTATAAATCCGCGACCAACAACGCCATCTGCAACACAAATCCTTATAACGAAT  
GCCGCGATGTCGGTATGCTCGTTGGCTTAGATGACTTTGTCGCTGCCAATAACGGCAAAGATATGCTGATCATGCTGCAC  
CAAATGGGCAATCACGGGCCTGCGTATTTTAAGCGATATGATGAAAAGTTTGCCAAATTCACGCCAGTGTGTGAAGGTAA  
TGAGCTTGCCAAGTGCGAACATCAGTCCTTGATCAATGCTTATGACAATGCCTTGCTTGCCACCGATGATTTTCATCGCTC  
AAAGTATCCAGTGGCTGCAGACGCACAGCAATGCCTATGATGTCTCAATGCTGTATGTCAGCGATCATGGCGAAAGTCTG  
GGTGAGAACGGTGTCTATCTACATGGTATGCCAAATGCCTTTGCACCAAAAAGAACAGCGCAGTGTGCCTGCATTTTTCTG  
GACGGATAAGCAAACCTGGCATCACGCCAATGGCAACCGATACCGTCCTGACCCATGACGCGATCACGCCGACATTATTAA  
AGCTGTTTGATGTCACCGCGGACAAAGTCAAAGACCGCACCGCATTCATCCGCTGATTTCTCCCTGTATTTTTTCCAAAC  
CCACCGCACACTCCATTTCGTATTATGGGCGGTGGGGTGGGGTTTGTATGCCGTATTTATCAAATAAACGCCTACTTGCT  
GAGATGAGTATCGCTCTTGTATGGCGATCGTTGCCACGCTGACCCTTGAGCACAGTCAGATTGATCTGATGGTCGCTGA  
TTGGTTTTATCTGGGTATGGGGCATTGGATGGTTGCCAAGCAAGCTTTTTTGCCAGATTTGCTACTGTATTCTGGACTAA  
AAAAGCTGCTGATGGCGATGCTGATCTACTTGCTGGTTGCGACCATTTGCCGTGCTTATCATGAGAAAAAGGGCAATGCT  
ATCACTGCCAAGTGGCTTGTCCCAGTGACAAAATTTTCGCGTGGTGAGCTTGCGTATCTGGTGCTGACTTTGATCCTAGT

GCCGACAGTTGTCGCGTCATTGAAGGCATATACTCATGTGGTCTGCCCTGTGCATTTGACGATTTTTGATGGTACGCTGC  
CGTATTTGCCGATGCTTGATAGTATGCGTAACACCATTCTGATAAGTGCTTTCCTGCGGCGCATGCCAGTAGCGGATTT  
GCGCTGTTTGCTTTGCGTTTGCGCCAAGTTTGCGCCGCCGTCGTGGTGCGATCATCATCGTGGTGATGGCATTGGGCTG  
GGCGATGGGCTGCTATAAGATGATTATTGGCGATCATTTTTTGAGCCATACGGTGGTGTCGATGATGCTTGCGTGGGCGA  
TGTCGGCAGGGCTTGCGTGGGTGTTTTTTAAGAAGGGTGAACAATTCAAGGAAAAAAAAATCAACCCCAAACAGAAATAAC  
AGCTACAAAAATGGACAGTAATAATGCAATAAAAGTAATGTTGAGCCATATGTTGGACGAGTCTTTTAAGACTAATGAGG  
CTGTTAATGCCATTGTAATGAACTAATGATAATAATGGCTGCAAATAAATATTGTACAATGTTTTTTATTGTACTTGGT  
TGCTCCCCAATTCTTTCTCTGTAATTTGCATCAACATTAGATATCCATTGAAGTAATAGAGCAATAAAACAGCCTACTCC  
GCAAACGGTGAATTGCACAGACGTCGGGTTTGAATCAAACAACGAGATCGCTAAGTTATATAAGTATACCGCGCCTGAAA  
TCACCCCGACAATAAAATAGAGATGAGTATAATCCGAAGAATAATGTATTGCTTTCCTTTAAGGAATATATTAAAGCC  
GCTTTTTCGTATTCTTTCATGATTTAATCCAGTCTATAAGTATAAGAACCAACAAAACCTGTCCAGGATTCATTTTCTGTG  
AGCATATGAAATCCCATCCAGAGTGATGATACTGGCAGAAACACGCCCACAGCCGGAATTATTAGTCTGGCGGAGAATAT  
CCTTATCAGGAGTATCAATAGTGATAAGAACAGAAAAAGAGTGATCATGTGGAAAAACATTCACATCACCTATAACACTA  
TTAAGATAGCCTGCCAGATATCCATTTAGACAGGCTATATACAGGGTTCAATTCATTCTATGAAAGGTGTATAGGGATT  
GCTGATGTTTGTGTGCGATCAAAAATCTAATATTAATAGATGAGAACTAATATACATATTTCCAGACGGATGGGGGGATTT  
TATCGTAGAGTTTATTCATTGTGAGTTCTGCAAGCCTGTGATCGGCGGCGGCATTAAACGACTCAAGCTCAGAAGGAGGG  
AGGCTGTTTTGGTTTTTTTTCAATAATCTTTTCAAGTGTGTGAGTGTTGAGCAACGTCTTAACTGAAAGAGCCAGTCTTG  
TTTTGTTTTATTGTACAATTCCTGAAGAACATCCTTGTCTATAGTAGCTACAACGATGTTTGATTTCTACTGCTGGAT  
TTATTTCTTACTTTTTTTGTGTAACTCAAATCCCAGTTTCCCGGTTGCTTTGTCAACCAGTTTTACTTTTGCTGAAAATT

CTTTGTTTGTGTTTTGACTAATGAAACCTTTCAATTCACCTGTAACCTCTTTGTTATTAACGTTTCAATTTGTTTATCG  
GTTAATGATTTGCCGCAGAAATCTTTCCATATCTTAAATTCACATCCTGTACAGAAATAACCTTTTGGTCTGATAACAAT  
CTGTTTACCACAGGAAGGACAAGGAGAGGGCAGGCGTTGTGACTGACCAGACGGCGCGCTGGGGGCAACTTTTATTTTCAG  
CACTGTTTCGATTACTAATCATCGGTATCAGATCATTGTACAGTTCGTCAACGAACTGTTTCGATGGTCATTTCTCCGTTT  
TCAATGAGTGTCTGTTTTTCCGCCATAATGCCGTCATATCTGGATTAACAGCTATATCCGGCAGAGCATCAATAAGCGC  
ATACCCGGTATCAGTCGGAATAAGTTTTCTTTTTCCAGGGTGATATAGTTCCGTTTTTTCAGTGTTTCCAATATGGAAG  
CCCGCGTAGCTGGCGTACCAATACCGCCATGTTTCGTCTTTTTTATCCCGATCTTTATCCTTCAGTAACTTTTTAATCACT  
GGATCAGTGACAAAATCTGCGACACGAACAAGCGCGGCAAGTAAAGTGGCTTCGGTGAATAATGGCGGTGGCGTTGTTTT  
CTTCTCATTACAAACCACTTCTTTTTGTCGTCACCTGTTTCTCCTGTGCGAATTTTACAGAGCAGATCAAAAGCGGAATCAT  
CATTTTCGGCTTCTGATTCCTCATCCCCGGTATTTTCTCACCAAGAAACGCTTCAAATCCGCTGTCTGTTGTTTTCTG  
GCACGGGCATAAAACGACTCATCACCACACTGAATGGCAACGGATACTTCCTGGTATGTTTTTTCAGGCATGAACTGAAC  
AAGATAGTGTGTGCGATTGCCAGGTAAACATTGCGCTCGTCACTGCTCAGCGCGTTTACATCCGGTACGTTAACGGTCG  
GGATTATCGCCGTATGCGCAGTCACTTTCGCACTGTTAAACGCCTTGCTTTTACGTGTCGAATCAACGTCCAGTGGCTGA  
TCGAATACTGACTTCAGGGCATCGAGAACCTGTGGTGCTTCGCTGAATTGTTTCATCAGAAAGATATGAGCAATCTGAACG  
GTTGTAAGTAATTGCTTTGTATTTTTACGTAGCTGCTGTGTGATATCCAGCGTTTGTTGTGCCGTCATTTTGAACCTTCT  
TGTTTCATGTACTGCTGAAGCCGGACCAGGTAAAGGGCAATGGCGCAGCCGTTTTTTTTATCGTCTGTTGCTGCTGCTTCA  
ACTGTCGCTGGTTTTCTGCAAGGGAAGCCGCTGTTCCATTGCCCCACGCCTTATCAAGTAATTTACGGTCTGTCAGTGG  
TGCGAACTCACCAGGTTTCCAGTTCGCCCTGATAACATCAACGCCGCGTTGAAAATGCCCGGTCATGGTGTAGTAGAAAC  
TGGATTTATGATTCTTGTTGGCACGGGTGCGATTTACTATCAGGCCAAGAATAGGCGTCTGAACACGCCCCGACCGAAAGT

GTCCCTTTATAGCCTTTAGCCCGTGCCGGGATCGTATAAGCACGCGTCATGGATAAACCGTATATCGCGTCGGCTACAGA  
ACGCGCCAGAGCCTTGAGATAGAGTCCTCTGAAGTCACGGTTATTTTTGGGATTTGCCAGTGCCTTTTTTCACTGCCGGAA  
GGGTGTTGTCGTTGATCAGAACGCGCTTAACGGGTTTTGTGTTGCCTGCATATTCCAGGACCTCATCGACAAGTAGCTGT  
CCTTCGTCATCTGGATCGCCAGCATGAATAATTTCCGGTCACATCGGCACGCCTGATAAGCTCAATAATCGTTTTAACTTG  
TTTTGCGGCGCTTTCTACTGGCTGGTATTTTACGGGATAAAGACGCAAAGGGAGTGTTTCAATCTTCCACTCTTTGTATT  
CAGGATTATAGTTTTTCGGGGGGCTGTGATTTCGATAATATGACCAAAACAGTTAGTCACAATAGTATTATCACTTTCAAAC  
CAGCCATCATGACGGGTAAAATTGCCACCAAGCGCCTTAACAATATCATTCGCTACTGCGGGTTTTTCTGCGATAAAAAG  
TTTCATTTTGTTATCCTTTACATTGAATTAATCTTTTGGCACAACGGATAGCACGTTCTTCTGATACTGCCTGTTGCCAG  
TTATCTTCACTTACTGGATGTCTGAATCTGCGTTCACAGCCATTAAAAGCAAAAATCCCCTCACGGTTAAGTATATTAGT  
TGCAATATCCTGGTCTTTAATTCTCAAAAAGGCTGTTACGGCAAAACCAGAATACGAAGAAATTTTTGAAATGATGCATT  
CATCAGCTTTTATTAACGCGGCAAAAGGAAGTATCTTTTGATGACCACACGAAATCAGAGGGAGTGTGTGAATATCATAA  
TAAGCTATTGAATGACAATCCATGCGGGTATCATCAATAGCTGCCAGCCAGAATCCTGTCTGGTCTTTTATTTTTCTGCT  
AATATCTGAATCTGAAACACCAGGATTTAATAAATATCCACCATAACAGACATGGAAGGGGTGAGCAGATTCATCAATAT  
CAGGAAGTTCTTTTACCGGATTTTCTTTCCAGTCCTTCAGAACACCGAATTCAAGAGCATCCAGCAAAAACCTTCGTTCA  
AATCCATCAAGCAATGCATATTGCATGTTAAACCTCTCAAAGAAGCTCTGATTTGTTGACCTCATGGTGAACCAGTTCAC  
CATTGCGTAAGACAAACAGGTAAGAAAACCTTTCTTTCCTTATCTTTTCAGTCAGTTTTTGTATTCAGAAAGAATAAACACC  
CAGTCATCGGTGCTGTAATGAGATGCGATGACTCATTATCTTTTTAGTGATGAGTTGATTATTTTTAAAATATGCCTGCC  
TTTAATTAGCATGTTTCTGGAAACAGCCTGATTACGAATACCTCTCATCTGGTCAAACCTGATAGGTAAATCATGTTCTT  
TTCGTGAAAGTCCAAGAGTGGCTCTTTCATTATCCATCAGGACTGAAATTGCAATATATTCTCCAGATGCACACCAGTCT

GCATAACTGGCAACGCAATGTTCCATCTCCTGACCTTCCTGACACAGAGCATCAAATGTAATTAATTCATTTACACCGTT  
ATCAACTTTCTGCCAGTTTATCCCAGTTCCTTTCCATTTTGGGATTACGGGAATAACGTTATTCTTCACTTGTCGCGTCC  
ATTCATCAGATAGTCTCCAGAAAGAAGGCCACTCCTGGTTTTTATGAATTAACCGTTCTTCTGCTAACAACCAGTCAATT  
GCATGACACAACCTGATTCGTTTTCCATTTCCCAGCGTGATGTTTGCCTGGATTCAGTATTACGGTCATAAAAGCCAATGTT  
TTTAAATAAATCACGATGATATTCTAGCCATTTTGAGCATATACGATAAATATCATTTTTCTTTTTCTGAGTAAGCTCGAA  
TGCTAATATAATCGATAATCCAGTAAATTGCTCTCACAGGATAGTTCTTGATAAGTGGATGGCGTAATAATCTGACTGTA  
AATCTGAATGATGCATTATCATGTTTATCATTTAAAGCATATACTAATGACAACTAACATGTCGTAAACTTCTGAACTC  
ACCATAACTAAGTTTGCAGGGAAAACCTGATTTTTTCATATAACTCTTTTGTCTTTCCAGATAGTATAAACTGACCATTTT  
TATGTTGTTGTCTTAGACGACCAACCATAGGCCACAATCCGAAAAAATCCATATCATTACAAATATGGATTCGCTTTGAA  
AAATCCAGATAGTCCTCAAATAATGCCTGACGAATTGAATTGTAAGCTATCGAACAATGTGAAGCTCTGGCATATTGTGC  
AAATATCTTTTTATCTACCATTATCCATATAGCTTTACTCAATGCTTTTGAAGCATTA AATTCAATTATCCACCCCTATAA  
TTTTTAATGCTCTCTGATAAATTTTGTTTTTTATCTCTGCGAGTAAAATATGTCTGCTGATATATCGTGTATTATAGGGG  
TAGTTGAATGATGCTATTTTACCAAGGCAATGAACAATGTCATGTATTCCATACTCATATGAGTAATATACATTGGATGG  
ATATAGTGTGGAAATATAACGACTCTCACTGTTTTCTCCTCTCCAATGCGTAACAAATAGAGTTTGTCTTCAATTG  
AATATCCAGCCTCAATCAATGATTTGATGATGTAGCTAATCGCATATTTTAACCAGTCGTCCATGTCGTATGCAGATTTT  
TTAGACCAGAATAAAAAAATCTTACCAGGAAATGAATTTCTTCTGGTCCATACCCCAGTGTGCTTATCTCTTAGCTTGTA  
TCCCCACAAAGTGATTTTGTATTCTTTTTGTTTTTCTAATACGAAAAACGCCACAAATGATAATGGAGATGTACTTTT  
CATTCTCCTCTGTTTTTACAAGACGAAGCCCCCTGTATTTTGATAGATTTTAAAAACATCATGCAACGTAAGAATATTA  
TTGTCCCTTGTCTGTTGATTAATTACATACATGCCGCCCCCTGTAAAAAAGAAGCCTTTAATATTGCACAAAGATAAAAA

GACAGAATCATGGCAAACCAAAAGAAGAATGCATTTTCTTGCCCCCTTAATTTCTGATACGCCATTCCCACGGTGGAACC  
GGATTTGCATCGGCCCAAAACCACGTTTTTGTTCCTGCGCTTCCCGTTGCAGAGCCGGTAATGACTCATCCACGTTGTA  
ACGTTTCATATACCCATGCAGCGCCAGACTGAACCATAAAGCGGGCTGGCATCCGTGCCGTTTCGTCTGTAACACATGACCGA  
TAATGCGTCCGTAGCGGTCTTTATGTGAATAAGAGACTGTCACCTGTTTACCTGCAACCAGAGTTTTAAGCTGACTAGTT  
GACCAGCGTCCAAAAGGTTGTTTCTTTTCAGGGGCATCGATGTTTATCAATCGGACTCGGATCGGAACTTCATACACAAC  
AATTTTTGCGGGTAGTGTTTTAATTTCTATGGTGTGCGCCATCGAGAACGCGAATAACTTTCCCCTGAAGAATTTTCTGGT  
TAAATGTATAAGGTATTCCACCTGCATTTGCAGACTGAAAAGCGGTAAGCAGATAAATAAATATTGTTAATAAGATTTTC  
ATAAAAGATTAACGTTAATTTGTCTGTGCAATGGATAGAGCGTTATTCTTATTTTCTTCCTGCCGCTTCATCGAAAAATG  
ATGATTTTCTACTGCTGCGGCATCATACTGAAATGAATATCCAAAATCATCGTCATGCTCAAAACCTGTATTTTCTCCA  
TTTTTTAGTCTGGAAAGAATAATCTCAAGTTGACTGATTATATCTTCCCTTTCCTATGACGAGTGCCTTGTAAGAGAAT  
AGTACTTGTGCAAAGGATATGCATGTTCAATCCATGCCTGGCTAGGTCCAGAGTGCCTTGATATATAAATTTTTTTGTG  
CCGAAATATTATTCAGAAAACAGTTTAAGTCATCATTGGAATAAATTTCTTTAATATTGTTGATGTTGGATGTTAGTTTT  
CCAAGTTGGAATGGTGGAGAATTTTTGTCTTCATTGTTGTCTCCTTTATCGTATTCTGGAAACACAATTAACAAAGGTGC  
ACCATTAGTTCTCTTCATAAAACGGGTACTAGCCGCCCAATATATTTATTGGACATATGCTGTTCAATGTCCAGGACAG  
CATATTCCTCCGCTGGGAACATTTTGTTTTTTTCGATGGATTTAATTTTTCTGGTAAGATGAATGTTTCTGATAAGCAAA  
CCTACTATCAGGAAGTAAATAAATATCCAGAATAAAAAATCACTCTGTAGTTGTTCTATCATAAGTGAATCCTCTAATTT  
GTTAATGGACAAATCATTACCCGTTTCATCAATGTTTGTAGGAAGTTCGCCAGGAGTAGGGACGCGTTCTCCTCGCTGGGC  
GGCTTGTGCCAGTGTTTCGTAGCAGCAACACGCTGGCATGAAATATGGCCTGTTCTTTTGTGGCTGCGCTTGTTTCCAGGT  
CGAAATCACTCAGAGTCACAACGACTTGCCCGTTTCTGTTCTCGACCGTTGCCGGGTAGGGAACAAAATAGGGAGCGATT

TTGCTGGTTTGCTTGCGTCGGGCATCGAGTTTACTGACAAGTTGATAAGCCCGAAGGTGTGTGTATCGTTTCAACATGTT  
CAGGGAGCGATGGCCTGAAATAGCGGCAACCTCAATGACGTTCAATGTACCAAGTTCGAAAAATCGGCTGATAGCCTCAT  
GACGGAGGTCATGAAAATGCAAGTTTTCTATCTTCAGTTCCTGAAGTGCTGTTGCCAGGCACTTTTGAATCCCGAAGAG  
GTATAAGAAAAAATATTACCGTTAAGCTGTGTCGGCAGCATTTGCAGGTAATTACGGGCTTTCCTGGATAGCGGAACATC  
GCGTGGAGCACCGTTTTTGGTTGTTGGAAGATGAGCTACCCCATGTTGCAGATCGACGTGTTCCCAACGCAATGACAAGA  
TTTACCTTGTTCGATTGCTGTTTCCAGCGCCAGATGAAAAATGACGTAAAGAGCCTGATTTTTTTCTTTGAAATACCGC  
GAAAGTCGGCGTTCTTCTCCTGAAGTCAGGCGACGATCGCGCCCGCTACTGATTTTGGGTTTTCTGACCAGTTCGACAGG  
ATTCATGCGGCATGTTCCCATTCACACGGGCGATATTGAATAATGATGACAACAGGGCAAGTTCAAGACGGACGGTGT  
TTCCGGTTATTTGACGCCCCGTTTCGTGGGTAAATTTGCGCCAACCGTTGATCCCGATAATTGGCAATATCAACAGTGGTA  
ATGTCATCCATATAGCGTTCAGCAATAGGGTGACGTTTAATCACATTTACGCGATAAACTCCTGTAGATGGCCTTTTTT  
GTGGATGGATACTGTCTTCAGGTATTTGTCCAGCGCCCGGCTGATTGTCATTTTGCGAATTTTGATTTTCTGAAACATAT  
CCCCTCCAGACAAAAAAGGGGGGAAGGTAGAGATTCTTGCTTCGAAATGCAATATCACCGTGCCAATCCGGTGTGTGGAA  
AAAAGGAGGAGGCATAGGGAAAGTCTCCTCCTATCAGCTTAATTTCCCATACTCTCAGTCAAACCTGGGGCAGCATACTT  
TTTGCGCATTATCCCATGTAAGAGCAACGGGTTTCCATAATTCAAACGATTATTCAGAATGCTCGTTATCTAAATCCGGA  
TCAAACCTGGCAACTAACAGCTTACCCACCTTCAATAGCTAGTTATCGTTGTGATGCAGTATGTATTGATTAATCATAGAA  
ATAGGGGTGCCAATCCGGTACGTGGAGAAGGGCATCAGGTAGCACTGTTCTGACAGGAAAAATAGCAAATGGACAACAGA  
TCCCATTGCCATCTGGTTTTTCTGCCAGCCAGTGTACCTGGAGTGTGAGTAATGCAGAAAAATCCGCACGGGTGGAAGCCG  
AATTATTTTGCGGGGTCAGTTGCAACCTATGATGCCAATCGAATTGTGAAATGCGGCTTCTATGACGAATACAACTTTTA  
TGGCGGTACTCACCGAACTGACCTGTGCGGGGAAATGTAGTTACATCGTGGTTTGCCAGTGATAAGTATCGTCACTGGCAA



ATGGCGTAAACTGTAATTGAACCATTTTGATCTTCGGTCGTGTCGCAACTGGCAGTCCATGCATTGTTGCCTGAAGGCAT  
GGAACGTGTGAGCCATATAAATCCGGTATTTGATCTGCATTGACCGCCTCCACCAATGACTTTCTTGCCAGATGGACATG  
TTGCCGTTGCTCCAGGCCAACGCCACGCAGTAGCTGAAGCGGTAACAATTTGGCTATCACCTGCGCCAATTTTTTTCCAC  
ACACCGGATTGGCACGGAGGCCAGTGCCAATCCGGTATCTGGACAACGGCAAAAGTGAACCTTCACTACCAGTACGTACAA  
TATCGGGAAAAACACCCGAAATCTGAGCATTGGCGTACATGCGTACTGTTTCGTGGACATACCTTAATGGTGCGCCTTTTG  
GTGGGTTTCAGCAGGTATACTCCGACCAAAACAAGGTTTGGTATGTGAATAATTATGCGTGGGGAAATTATGAGTCCGGC  
GGCACAATTACTGTTACATGCCTGAATCTTCCTGGTGCTGGGATTTAACCGAAGGGGGCAACAATAAGCATCAACGTGTTT  
CTCATCAACGCCATCACCAATGCCATACATGCGTGTACCTGTTCATGATAAATCCGGTCGGGCATTGAATGGGTTTGTAGT  
AGATAGATCCTCCACTTTTCCCGCCAATGAAGTGATTCAATTGCTACAGATGATTGATACCACTTACAGGCGGAGTAGTTC  
ACTTTATTGCCACCAGACCACCGACCGGATTGGCACTGGCCTCCGTGCCAATCCGGTGTGTGGAGAACTTCCGGTTCCTC  
TAACGGTAGTTACAGTAATCTTGGATCACACCGAGGATCATTTACTGGTCGCAATACGGGAAGTGGTACGCTGTTTGT  
ACGCCTCTGGAGGGAATGGTGGTTCCGCCGGGGGAGATTGTGCTAACACATCCAGATTGCAGGGATACGTTGCAGGGGCA  
TTGATTAGCACAATGCGAGCAACAACCCATCTTATGGGAAGACAGCATTCATCTCTTTTGCTGTCCCTGCTGGCGCAAC  
TTATCAGATCACCTCTTATCCGGCCCCAAAATACTCTTGTGGCTCAGGGGTATTTTCAGTATTTGGATACCAAATAAT  
TGAGAGTTACACAGGACGCAATACAACCTGTCTTGTGCTCGTATTTGTACCATTTTCGTGAACCAGATGGACTCTCGACT  
ACCTGGCAGTAATGAGAATCCTCAGCATTTCCATTCTGGCAATGGCACAAAAGTCAAATTGCCCCAAGTAACCAGTGCT  
GGAAAGTTGAGTAACCTTGAGCTTTCCACCTAATGCCCTCCACACACCGGATTGGCACGGAGGCCAGTGCCAATCCGGTC  
GGTGGTCTGGTGGCAATAAAGTGAACCTACTCCGCCTGTAAGTGGTATCAATCATCTGTAGCAATGAATCACTTCATTGGC  
GGGA

>NG\_064789.1 Escherichia coli sc12-96 mcr-1 gene for phosphoethanolamine--lipid A transferase MCR-1.18, complete CDS

CGCATAATTTTTATATCAGATAAATTGTACTGGATTCTTAAAAAATTGCAGTATAATTGCCGCAATTATCCCACCGTT  
TATTTTTTGAGTAGTTTCTCATGATGCAGCATACTTCTGTGTGGGACCGACGCTCGGTCAGTCCGTTTGTCTTGTGGCG  
AGTGTTGCCGTTTTCTTGACCGCGACCGCCAATCTTACCTTTTTTGATAAAATCAGCCAAACCTATCCCATCGCGGACAA  
TCTCGGCTTTGTGCTGACGATCGCTGTCGTGCTCTTTGGCGCGATGCTACTGATCACCACGCTGTTATCATCGTATCGCT  
ATGTGCTAAAGCCTGTGTTGATTTTGCTATTAATCATGGGCGCGGTGACCAGTTATTTTACTGACACTTATGGCACGGTC  
TATGATACGACCATGCTCCAAAATGCCCTACAGACCGACCAAGCCGAGACCAAGGATCTATTAACGCAGCGTTTATCAT  
GCGTATCATTGGTTTGGGTGTGCTACCAAGTTTGCTTGTGGCTTTTGTTAAGGTGGATTATCCGACTTGGGGCAAGGGTT  
TGATGCGCCGATTGGGCTTGATCGTGGCAAGTCTTGCGCTGATTTTACTGCCTGTGGTGGCGTTCAGCAGTCATTATGCC  
AGTTTCTTTCGCGTGCATAAGCCGCTGCGTAGCTATGTCAATCCGATCATGCCAATCTACTCGGTGGGTAAGCTTGCCAG  
TATTGAGTATAAAAAAGCCAGTGCGCCAAAAGATACCATTTATCACGCCAAAGACGCGGTACAAGCAACCAAGCCTGATA  
TGCGTAAGCCACGCCTAGTGGTGTTTCGTGTCGGTGAGACGGCACGCGCCGATCATGTCAGCTTCAATGGCTATGAGCGC  
GATACTTTCCACAGCTTGCCAAGATCGATGGCGTGACCAATTTTAGCAATGTCACATCGTGCGGCACATCGACGGCGTA  
TTCTGTGCCGTGTATGTTTCACTATCTGGGCGCGGATGAGTATGATGTCGATACCGCCAAATACCAAGAAAATGTGCTGG  
ATACGCTGGATCGCTTGGGCGTAAGTATCTTGTGGCGTGATAATAATTCGGACTCAAAGGCGTGATGGATAAGCTGCCA  
AAAGCGCAATTTGCCGATTATAAATCCGCGACCAACAACGCCATCTGCAACACCAATCCTTATAACGAATGCCGCGATGT  
CGGTATGCTCGTTGGCTTAGATGACTTTGTGCTGCCAATAACGGCAAAGATATGCTGATCATGCTGCACCAAATGGGCA  
ATCACGGGCCTGCGTATTTTAAGCGATATGATGAAAAGTTTGCCAAATTCACGCCAGTGTGTGAAGGTAATGAGCTTGCC  
AAGTGCGAACATCAGTCCTTGATCAATGCTTATGACAATGCCTTGCTTGCCACCGATGATTCATCGCTCAAAGTATCCA

GTGGCTGCAGACGCACAGCAATGCCTATGATGTCTCAATGCTGTATGTCAGCGATCATGGCGAAAGTCTGGGTGAGAACG  
GTGTCTATCTACATGGTATGCCAAATGCCTTTGCACCAAAAGAACAGCGCAGTGTGCCTGCATTTTTCTGGACGGATAAG  
CAAACCTGGCATCACGCCAATGGCAACCGATACCGTCCTGACCCATGACGCGATCACGCCGACATTATTAAAGCTGTTTGA  
TGTCACCGCGGACAAAGTCAAAGACCGCACCGCATTTCATCCGCTGATTTCTCCCTGTATTTTTTCCAAACCCACCGCACA  
CTCCATTTCGTATTATGGGCGGTGGGGTGGGGTTTGTATGCCGTATTTATCAAATAAACGCCTACT

>NG\_064788.1 Escherichia coli ECK2 mcr-1 gene for phosphoethanolamine--lipid A transferase MCR-1.17, complete CDS

ATGATGCAGCATACTTCTGTGTGGTACCGACGCTCGGTTCAGTCCGTTTGTTCCTGTGGCGAGTGTTGCCGTTTTCTTGAC  
CGCGACCGCCAATCTTACCTTTTTTGATAAAATCAGCCAAACCTATCCCATCGCGGACAATCTCGGCTTTGTGCTGACGA  
TCGCTGTCGTGCTCTTTGGCGCGATGCTACTGATCACCACGCTGTTATCATCGTATCGCTATGTGCTAAAGCCTGTGTTG  
ATTTTGCTATTAATCATGGGCGCGGTGACCAGTTATTTTACTGACACTTATGGCACGGTCTATGATACGACCATGCTCCA  
AAATGCCCTACAGACCGACCAAGCCGAGACCAAGGATCTATTAAACGCAGCGTTTATCATGCGTATCATTGGTTTGGGTG  
TGCTACCAACTTTGCTTGTGGCTTTTGTAAAGGTGGATTATCCGACTTGGGGCAAGGGTTTGATGCGCCGATTGGGCTTG  
ATCGTGGCAAGTCTTGCGCTGATTTTACTGCCTGTGGTGGCGTTCAGCAGTCATTATGCCAGTTTCTTTTCGCGTGCATAA  
GCCGCTGCGTAGCTATGTCAATCCGATCATGCCAATCTACTCGGTGGGTAAGCTTGCCAGTATTGAGTATAAAAAAGCCA  
GTGCGCCAAAAGATACCATTATCACGCCAAAGACGCGGTACAAGCAACCAAGCCTGATATGCGTAAGCCACGCCTAGTG  
GTGTTTCGTGTCGGTGAGACGGCACGCGCCGATCATGTCAGCTTCAATGGCTATGAGCGCGATACTTTCCCACAGCTTGC  
CAAGATCGATGGCGTGACCAATTTTAGCAATGTCACATCGTGCGGCACATCGACGGCGTATTCTGTGCCGTGTATGTTCA  
GCTATCTGGGCGCGGATGAGTATGATGTGCGATACCGCCAAATACCAAGAAAATGTGCTGGATACGCTGGATCGCTTGGGC  
GTAAGTATCTTGTGGCGTGATAATAATTCGGACTCAAAGGCGTGATGGATAAGCTGCCAAAAGCGCAATTTGCCGATTA

TAAATCCGCGACCAACAACGCCATCTGCAACACCAATCCTTATAACGAATGCCGCGATGTCGGTATGCTCGTTGGCTTAG  
ATGACTTTTGTGCTGCCAATAACGGCAAAGATATGCTGATCATGCTGCACCAAATGGGCAATCACGGGCCTGCGTATTTT  
AAGCGATATGATGAAAAGTTTGCCAAATTCACGCCAGTGTGTGAAGGTAATGAGCTTGCCAAGTGCGAACATCAGTCCTT  
GATCAATGCTTATGACAATGCCTTGCTTGCCACCGATGATTTTCATCGCTCAAAGTATCCAGTGGCTGCAGACGCACAGCA  
ATGCCTATGATGTCTCAATGCTGTATGTCAGCGATCATGGCGAAAGTCTGGGTGAGAACGGTGTCTATCTACATGGTATG  
CCAAATGCCTTTGCACCAAAAGAACAGCGCAGTGTGCCTGCATTTTTCTGGACGGATAAGCAAACCTGGCATCACGCCAAT  
GGCAACCGATACCGTCCTGACCCATGACGCGATCACGCCGACATTATTAAAGCTGTTTGATGTCACCGCGGACAAAGTCA  
AAGACCGCACCGCATTCATCCGCTGA

>NG\_064787.1 Escherichia coli EC32 mcr-1 gene for phosphoethanolamine--lipid A transferase MCR-1.16, complete CDS

ATGATGCAGCATACTTCTGTGTGGTACCGACGCTCGGTCAGTCCGTTTGTTCCTTGTGGCGAGTGTTGCCGTTTTCTTGAC  
CGCGACCGCCAATCTTACCTTTTTTGATAAAATCAGCCAAACCTATCCCATCGCGGACAATCTCGGCTTTGTGCTGACGA  
TCGCTGTCGTGCTCTTTGGCGCGATGCTACTGATCACCACGCTGTTATCATCGTATCGCTATGTGCTAAAGCCTGTGTTG  
ATTTTGCTATTAATCATGGGCGCGGTGACCAGTTATTTTACTGACACTTATGGCACGGTCTATGATACGACCATGCTCCA  
AAATGCCCTACAGACCGACCAAGCCGAGACCAAGGATCTATTAAACGCAGCGTTTATCATGCGTATCATTGGTTTGGGTG  
TGCTACCAAGTTTGCTTGTGGCTTTTGTTAAGGTGGATTATCCGACTTGGGGCAAGGGTTTGATGCGCCGATTGGGCTTG  
ATCGTGGCAAGTCTTGCGCTGATTTTACTGCCTGTGGTGGCGTTCAGCAGTCATTATGCCAGTTTCTTTTCGCGTGCATAA  
GCCGCTGCGTAGCTATGTCAATCCGATCATGCCAATCTACTCGGTGGGTAAAGCTTGCCAGTATTGAGTATAAAAAAGCCA  
GTGCGCCAAAAGATACCATTATCACGCCAAAGACGCGGTACAAGCAACCAAGCCTGATATGCGTAAGCCACGCCTAGTG  
GTGTTTCGTGTCGGTGAGACGGCACGCGCCGATCATGTCAGCTTCAATGGCTATGAGCGCGATACTTTCCACAGCTTGC

CAAGATCGATGGCGTGACCAATTTTAGCAATGTCACATCGTGCGGCACATCGACGGCGTATTCTGTGCCGTGTATGTTCA  
GCTATCTGGGCGCGGATGAGTATGATGTGCGATACCGCCAAATACCAAGAAAATGTGCTGGATACGCTGGATAGCTTGGGC  
GTAAGTATCTTGTGGCGTGATAATAATTCGGACTCAAAAGGCGTGATGGATAAGCTGCCAAAAGCGCAATTTGCCGATTA  
TAAATCCGCGACCAACAACGCCATCTGCAACACCAATCCTTATAACGAATGCCGCGATGTCGGTATGCTCGTTGGCTTAG  
ATGACTTTGTGCTGCCAATAACGGCAAAGATATGCTGATCATGCTGCACCAAATGGGCAATCACGGGCCTGCGTATTTT  
AAGCGATATGATGAAAAGTTTGCCAAATTCACGCCAGTGTGTGAAGGTAATGAGCTTGCCAAGTGCGAACATCAGTCCTT  
GATCAATGCTTATGACAATGCCTTGCTTGCCACCGATGATTTTCATCGCTCAAAGTATCCAGTGGCTGCAGACGCACAGCA  
ATGCCTATGATGTCTCAATGCTGTATGTCAGCGATCATGGCGAAAGTCTGGGTGAGAACGGTGTCTATCTACATGGTATG  
CCAAATGCCTTTGCACCAAAAAGAACAGCGCAGTGTGCCTGCATTTTTCTGGACGGATAAGCAAACCTGGCATCACGCCAAT  
GGCAACCGATACCGTCCTGACCCATGACGCGATCACGCCGACATTATTAAAGCTGTTTGATGTCACCGCGGACAAAGTCA  
AAGACCGCACCGCATTTCATCCGCTGA

>MK568463.1 Escherichia coli strain ECK2 phosphoethanolamine--lipid A transferase MCR-1.17 (mcr-1) gene, mcr-1.17 allele,  
complete cds

ATGATGCAGCATACTTCTGTGTGGTACCGACGCTCGGTCAGTCCGTTTGTTCTTGTGGCGAGTGTTGCCGTTTTCTTGAC  
CGCGACCGCCAATCTTACCTTTTTTGATAAAATCAGCCAAACCTATCCCATCGCGGACAATCTCGGCTTTGTGCTGACGA  
TCGCTGTCGTGCTCTTTGGCGCGATGCTACTGATCACCACGCTGTTATCATCGTATCGCTATGTGCTAAAGCCTGTGTTG  
ATTTTGCTATTAATCATGGGCGCGGTGACCAGTTATTTTACTGACACTTATGGCACGGTCTATGATACGACCATGCTCCA  
AAATGCCCTACAGACCGACCAAGCCGAGACCAAGGATCTATTAAACGCAGCGTTTATCATGCGTATCATTGGTTTGGGTG  
TGCTACCAACTTTGCTTGTGGCTTTTGTTAAGGTGGATTATCCGACTTGGGGCAAGGGTTTGATGCGCCGATTGGGCTTG  
ATCGTGGCAAGTCTTGCGCTGATTTTACTGCCTGTGGTGGCGTTCAGCAGTCATTATGCCAGTTTCTTTTCGCGTGCATAA

GCCGCTGCGTAGCTATGTCAATCCGATCATGCCAATCTACTCGGTGGGTAAGCTTGCCAGTATTGAGTATAAAAAAGCCA  
GTGCGCCAAAAGATACCATTTATCACGCCAAAGACGCGGTACAAGCAACCAAGCCTGATATGCGTAAGCCACGCCTAGTG  
GTGTTTCGTCGTCGGTGAGACGGCACGCGCCGATCATGTCAGCTTCAATGGCTATGAGCGCGATACTTTCCCACAGCTTGC  
CAAGATCGATGGCGTGACCAATTTTAGCAATGTCACATCGTGCGGCACATCGACGGCGTATTCTGTGCCGTGTATGTTCA  
GCTATCTGGGCGCGGATGAGTATGATGTGCGATACCGCCAAATACCAAGAAAATGTGCTGGATACGCTGGATCGCTTGGGC  
GTAAGTATCTTGTGGCGTGATAATAATTCGGACTCAAAGGCGTGATGGATAAGCTGCCAAAAGCGCAATTTGCCGATTA  
TAAATCCGCGACCAACAACGCCATCTGCAACACCAATCCTTATAACGAATGCCGCGATGTCGGTATGCTCGTTGGCTTAG  
ATGACTTTGTGCGCTGCCAATAACGGCAAAGATATGCTGATCATGCTGCACCAAATGGGCAATCACGGGCCTGCGTATTTT  
AAGCGATATGATGAAAAGTTTGCCAAATTCACGCCAGTGTGTGAAGGTAATGAGCTTGCCAAGTGCGAACATCAGTCCTT  
GATCAATGCTTATGACAATGCCTTGCTTGCCACCGATGATTTTCATCGCTCAAAGTATCCAGTGGCTGCAGACGCACAGCA  
ATGCCTATGATGTCTCAATGCTGTATGTCAGCGATCATGGCGAAAGTCTGGGTGAGAACGGTGTCTATCTACATGGTATG  
CCAAATGCCTTTGCACCAAAAGAACAGCGCAGTGTGCCTGCATTTTTCTGGACGGATAAGCAAACCTGGCATCACGCCAAT  
GGCAACCGATACCGTCCTGACCCATGACGCGATCACGCCGACATTATTAAAGCTGTTTGATGTCACCGCGGACAAAGTCA  
AAGACCGCACCGCATTTCATCCGCTGA

>MK568462.1 Escherichia coli strain EC32 phosphoethanolamine--lipid A transferase MCR-1.16 (mcr-1) gene, mcr-1.16 allele, complete cds

ATGATGCAGCATACTTCTGTGTGGTACCGACGCTCGGTTCAGTCCGTTTGTTCCTGTGGCGAGTGTTGCCGTTTTCTTGAC  
CGCGACCGCCAATCTTACCTTTTTTGATAAAATCAGCCAAACCTATCCCATCGCGGACAATCTCGGCTTTGTGCTGACGA  
TCGCTGTCGTGCTCTTTGGCGCGATGCTACTGATCACCACGCTGTTATCATCGTATCGCTATGTGCTAAAGCCTGTGTTG  
ATTTTGCTATTAATCATGGGCGCGGTGACCAGTTATTTTACTGACACTTATGGCACGGTCTATGATACGACCATGCTCCA

AAATGCCCTACAGACCGACCAAGCCGAGACCAAGGATCTATTAAACGCAGCGTTTATCATGCGTATCATTGGTTTGGGTG  
TGCTACCAAGTTTGCTTGTGGCTTTTGTAAAGGTGGATTATCCGACTTGGGGCAAGGGTTTGATGCGCCGATTGGGCTTG  
ATCGTGGCAAGTCTTGCGCTGATTTTACTGCCTGTGGTGGCGTTCAGCAGTCATTATGCCAGTTTCTTTCGCGTGCATAA  
GCCGCTGCGTAGCTATGTCAATCCGATCATGCCAATCTACTCGGTGGGTAAAGCTTGCCAGTATTGAGTATAAAAAAGCCA  
GTGCGCCAAAAGATACCATTTATCACGCCAAAGACGCGGTACAAGCAACCAAGCCTGATATGCGTAAGCCACGCCTAGTG  
GTGTTTCGTCGTCGGTGAGACGGCACGCGCCGATCATGTCAGCTTCAATGGCTATGAGCGCGATACTTTCCACAGCTTGC  
CAAGATCGATGGCGTGACCAATTTTAGCAATGTCACATCGTGCGGCACATCGACGGCGTATTCTGTGCCGTGTATGTTCA  
GCTATCTGGGCGCGGATGAGTATGATGTCGATACCGCCAAATACCAAGAAAATGTGCTGGATACGCTGGATAGCTTGGGC  
GTAAGTATCTTGTGGCGTGATAATAATTCGGA CTCAAAGGCGTGATGGATAAGCTGCCAAAAGCGCAATTTGCCGATTA  
TAAATCCGCGACCAACAACGCCATCTGCAACACCAATCCTTATAACGAATGCCGCGATGTCGGTATGCTCGTTGGCTTAG  
ATGACTTTGTGCTGCCAATAACGGCAAAGATATGCTGATCATGCTGCACCAAATGGGCAATCACGGGCCTGCGTATTTT  
AAGCGATATGATGAAAAGTTTGCCAAATTCACGCCAGTGTGTGAAGGTAATGAGCTTGCCAAGTGCGAACATCAGTCCTT  
GATCAATGCTTATGACAATGCCTTGCTTGCCACCGATGATTTTCATCGCTCAAAGTATCCAGTGGCTGCAGACGCACAGCA  
ATGCCTATGATGTCTCAATGCTGTATGTCAGCGATCATGGCGAAAGTCTGGGTGAGAACGGTGTCTATCTACATGGTATG  
CCAAATGCCTTTGCACCAAAAGAACAGCGCAGTGTGCCTGCATTTTTCTGGACGGATAAGCAA ACTGGCATCACGCCAAT  
GGCAACCGATACCGTCCTGACCCATGACGCGATCACGCCGACATTATTAAAGCTGTTTGATGTCACCGCGGACAAAGTCA  
AAGACCGCACCGCATTTCATCCGCTGA

>MG198057.1 Escherichia coli strain SFV97 phosphoethanolamine transferase MCR-1.11 (mcr-1) gene, mcr-1.11 allele, complete cds  
ATGATGCAGCATACTTCTGTGTGGTACCGACGCTCGGTCAGTCCGTTTGTTCCTGTGGCGAGTGTTGCCGTTTTCTTGAC

CGCGACCGCCAATCTTACCTTTTTTGATAAAATCAGCCAAACCTATCCCATCGCGGACAATCTCGGCTTTGTGCTGACGA  
TCGCTGTCGTGCTCTTTGGCGCGCTGCTACTGATCACCACGCTGTTATCATCGTATCGCTATGTGCTAAAGCCTGTGTTG  
ATTTTGCTATTAATCATGGGCGCGGTGACCAGTTATTTTACTGACACTTATGGCACGGTCTATGATACGACCATGCTCCA  
AAATGCCCTACAGACCGACCAAGCCGAGACCAAGGATCTATTAACGCAGCGTTTATCATGCGTATCATTGGTTTGGGTG  
TGCTACCAAGTTTGCTTGTGGCTTTTGTTAAGGTGGATTATCCGACTTGGGGCAAGGGTTTGATGCGCCGATTGGGCTTG  
ATCGTGGCAAGTCTTGCGCTGATTTTACTGCCTGTGGTGGCGTTCAGCAGTCATTATGCCAGTTTCTTTCGCGTGCATAA  
GCCGCTGCGTAGCTATGTCAATCCGATCATGCCAATCTACTCGGTGGGTAAAGCTTGCCAGTATTGAGTATAAAAAAGCCA  
GTGCGCCAAAAGATACCATTTATCACGCCAAAGACGCGGTACAAGCAACCAAGCCTGATATGCGTAAGCCACGCCTAGTG  
GTGTTTCGTCGTGCGTGAGACGGCACGCGCCGATCATGTCAGCTTCAATGGCTATGAGCGCGATACTTTCCACAGCTTGC  
CAAGATCGATGGCGTGACCAATTTTAGCAATGTCACATCGTGCGGCACATCGACGGCGTATTCTGTGCCGTGTATGTTCA  
GCTATCTGGGCGCGGATGAGTATGATGTCGATACCGCCAAATACCAAGAAAATGTGCTGGATACGCTGGATCGCTTGGGC  
GTAAGTATCTTGTGGCGTGATAATAATTCGGACTCAAAGGCGTGATGGATAAGCTGCCAAAAGCGCAATTTGCCGATTA  
TAAATCCGCGACCAACAACGCCATCTGCAACACCAATCCTTATAACGAATGCCGCGATGTCGGTATGCTCGTTGGCTTAG  
ATGACTTTGTCGCTGCCAATAACGGCAAAGATATGCTGATCATGCTGCACCAAATGGGCAATCACGGGCCTGCGTATTTT  
AAGCGATATGATGAAAAGTTTGCCAAATTCACGCCAGTGTGTGAAGGTAATGAGCTTGCCAAGTGCGAACATCAGTCCTT  
GATCAATGCTTATGACAATGCCTTGCTTGCCACCGATGATTTTCATCGCTCAAAGTATCCAGTGGCTGCAGACGCACAGCA  
ATGCCTATGATGTCTCAATGCTGTATGTCAGCGATCATGGCGAAAGTCTGGGTGAGAACGGTGTCTATCTACATGGTATG  
CCAAATGCCTTTGCACCAAAAGAACAGCGCAGTGTGCCTGCATTTTTCTGGACGGATAAGCAAACCTGGCATCACGCCAAT  
GGCAACCGATACCGTCCTGACCCATGACGCGATCACGCCGACATTATTAAAGCTGTTTGATGTCACCGCGGACAAAGTCA



AAGACCGCACCGCATTTCATCCGCTGA

>NG\_057466.1 Escherichia coli 12-AB00501 mcr-1 gene for phosphoethanolamine--lipid A transferase MCR-1.13, complete CDS

ATGATGCAGCATACTTCTGTGTGGTACCGACGCTCGGTTCAGTCCGTTTGTTCCTGTGGCGAGTGTTGCCGTTTTCTTGAC  
CGCGACCGCCAATCTTACCTTTTTTTGATAAAATCAGCCAAACCTATCCCATCGCGGACAATCTCGGCTTTGTGCTGACGA  
TCGCTGTCGTGCTCTTTGGCGCGATGCTACTGATCACCACGCTGTTATCATCGTATCGCTATGTGCTAAAGCCTGTGTTG  
ATTTTGCTATTAATCATGGGCGCGGTGACCAGTTATTTTACTGACACTTATGGCACGGTCTATGATACGACCATGCTCCA  
AAATGCCCTACAGACCGACCAAGCCGAGACCAAGGATCTATTAACGCAGCGTTTATCATGCGTATCATTGGTTTGGGTG  
TGCTACCAAGTTTGCTTGTGGCTTTTGTTAAGGTGGATTATCCGACTTGGGGCAAGGGTTTGATACGCCGATTGGGCTTG  
ATCGTGGCAAGTCTTGCGCTGATTTTACTGCCTGTGGTGGCGTTCAGCAGTCATTATGCCAGTTTCTTTCGCGTGCATAA  
GCCGCTGCGTAGCTATGTCAATCCGATCATGCCAATCTACTCGGTGGGTAAAGCTTGCCAGTATTGAGTATAAAAAAGCCA  
GTGCGCCAAAAGATACCATTTATCACGCCAAAGACGCGGTACAAGCAACCAAGCCTGATATGCGTAAGCCACGCCTAGTG  
GTGTTTCGTCGTCGGTGAGACGGCACGCGCCGATCATGTCAGCTTCAATGGCTATGAGCGCGATACTTTCCACAGCTTGC  
CAAGATCGATGGCGTGACCAATTTTAGCAATGTCACATCGTGCGGCACATCGACGGCGTATTCTGTGCCGTGTATGTTCA  
GCTATCTGGGCGCGGATGAGTATGATGTGATACCGCCAAATACCAAGAAAATGTGCTGGATACGCTGGATCGCTTGGGC  
GTAAGTATCTTGTGGCGTGATAATAATTCGGACTCAAAGGCGTGATGGATAAGCTGCCAAAAGCGCAATTTGCCGATTA  
TAAATCCGCGACCAACAACGCCATCTGCAACACCAATCCTTATAACGAATGCCGCGATGTCGGTATGCTCGTTGGCTTAG  
ATGACTTTGTGCTGCCAATAACGGCAAAGATATGCTGATCATGCTGCACCAAATGGGCAATCACGGGCCTGCGTATTTT  
AAGCGATATGATGAAAAGTTTGCCAAATTCACGCCAGTGTGTGAAGGTAATGAGCTTGCCAAGTGCGAACATCAGTCCTT  
GATCAATGCTTATGACAATGCCTTGCTTGCCACCGATGATTTTCATCGCTCAAAGTATCCAGTGGCTGCAGACGCACAGCA

ATGCCTATGATGTCTCAATGCTGTATGTCAGCGATCATGGCGAAAGTCTGGGTGAGAACGGTGTCTATCTACATGGTATG  
CCAAATGCCTTTGCACCAAAAGAACAGCGCAGTGTGCCTGCATTTTTCTGGACGGATAAGCAAACCTGGCATCACGCCAAT  
GGCAACCGATACCGTCCTGACCCATGACGCGATCACGCCGACATTATTAAAGCTGTTTGATGTCACCGCGGACAAAGTCA  
AAGACCGCACCGCATTTCATCCGCTGA

>NG\_056412.1 Escherichia coli EC15-101 mcr-1 gene for phosphoethanolamine--lipid A transferase MCR-1.12, complete CDS

ATGATGCACCATACTTCTGTGTGGTACCGACGCTCGGTTCAGTCCGTTTGTTCTTGTGGCGAGTGTTGCCGTTTTCTTGAC  
CGCGACCGCCAATCTTACCTTTTTTGATAAAATCAGCCAAACCTATCCCATCGCGGACAATCTCGGCTTTGTGCTGACGA  
TCGCTGTCGTGCTCTTTGGCGCGATGCTACTGATCACCACGCTGTTATCATCGTATCGCTATGTGCTAAAGCCTGTGTTG  
ATTTTGCTATTAATCATGGGCGCGGTGACCAGTTATTTTACTGACACTTATGGCACGGTCTATGATACGACCATGCTCCA  
AAATGCCCTACAGACCGACCAAGCCGAGACCAAGGATCTATTAAACGCAGCGTTTATCATGCGTATCATTGGTTTGGGTG  
TGCTACCAAGTTTGCTTGTGGCTTTTGTTAAGGTGGATTATCCGACTTGGGGCAAGGGTTTGATGCGCCGATTGGGCTTG  
ATCGTGGCAAGTCTTGCGCTGATTTTACTGCCTGTGGTGGCGTTCAGCAGTCATTATGCCAGTTTCTTTCGCGTGCATAA  
GCCGCTGCGTAGCTATGTCAATCCGATCATGCCAATCTACTCGGTGGGTAAGCTTGCCAGTATTGAGTATAAAAAAGCCA  
GTGCGCCAAAAGATACCATTTATCACGCCAAAGACGCGGTACAAGCAACCAAGCCTGATATGCGTAAGCCACGCCTAGTG  
GTGTTTCGTCGTCGGTGAGACGGCACGCGCCGATCATGTCAGCTTCAATGGCTATGAGCGCGATACTTTCCACAGCTTGC  
CAAGATCGATGGCGTGACCAATTTTAGCAATGTCACATCGTGCGGCACATCGACGGCGTATTCTGTGCCGTGTATGTTCA  
GCTATCTGGGCGCGGATGAGTATGATGTCGATACCGCCAAATACCAAGAAAATGTGCTGGATACGCTGGATCGCTTGGGC  
GTAAGTATCTTGTGGCGTGATAATAATTCGGACTCAAAGGCGTGATGGATAAGCTGCCAAAAGCGCAATTTGCCGATTA  
TAAATCCGCGACCAACAACGCCATCTGCAACACCAATCCTTATAACGAATGCCGCGATGTCGGTATGCTCGTTGGCTTAG

ATGACTTTGTCGCTGCCAATAACGGCAAAGATATGCTGATCATGCTGCACCAAATGGGCAATCACGGGCCTGCGTATTTT  
AAGCGATATGATGAAAAGTTTGCCAAATTCACGCCAGTGTGTGAAGGTAATGAGCTTGCCAAGTGCGAACATCAGTCCTT  
GATCAATGCTTATGACAATGCCTTGCTTGCCACCGATGATTTTCATCGCTCAAAGTATCCAGTGGCTGCAGACGCACAGCA  
ATGCCTATGATGTCTCAATGCTGTATGTCAGCGATCATGGCGAAAGTCTGGGTGAGAACGGTGTCTATCTACATGGTATG  
CCAAATGCCTTTGCACCAAAAGAACAGCGCAGTGTGCCTGCATTTTTCTGGACGGATAAGCAAACCTGGCATCACGCCAAT  
GGCAACCGATACCGTCCTGACCCATGACGCGATCACGCCGACATTATTAAAGCTGTTTGATGTCACCGCGGACAAAGTCA  
AAGACCGCACCGCATTCATCCGCTGA

>MG384739.1 Escherichia coli strain 12-AB00501 phosphoethanolamine--lipid A transferase MCR-1.13 (mcr-1) gene, mcr-1.13 allele, complete cds

ATGATGCAGCATACTTCTGTGTGGTACCGACGCTCGGTCAGTCCGTTTGTTCTTGTTGGCGAGTGTTGCCGTTTTCTTGAC  
CGCGACCGCCAATCTTACCTTTTTTGATAAAATCAGCCAAACCTATCCCATCGCGGACAATCTCGGCTTTGTGCTGACGA  
TCGCTGTCGTGCTCTTTGGCGCGATGCTACTGATCACCACGCTGTTATCATCGTATCGCTATGTGCTAAAGCCTGTGTTG  
ATTTTGCTATTAATCATGGGCGCGGTGACCAGTTATTTTACTGACACTTATGGCACGGTCTATGATACGACCATGCTCCA  
AAATGCCCTACAGACCGACCAAGCCGAGACCAAGGATCTATTAAACGCAGCGTTTATCATGCGTATCATTGGTTTGGGTG  
TGCTACCAAGTTTGCTTGTGGCTTTTGTTAAGGTGGATTATCCGACTTGGGGCAAGGGTTTGATACGCCGATTGGGCTTG  
ATCGTGGCAAGTCTTGCGCTGATTTTACTGCCTGTGGTGGCGTTCAGCAGTCATTATGCCAGTTTCTTTCGCGTGCATAA  
GCCGCTGCGTAGCTATGTCAATCCGATCATGCCAATCTACTCGGTGGGTAAAGCTTGCCAGTATTGAGTATAAAAAAGCCA  
GTGCGCCAAAAGATACCATTTATCACGCCAAAGACGCGGTACAAGCAACCAAGCCTGATATGCGTAAGCCACGCCTAGTG  
GTGTTTCGTCGTGCGTGAGACGGCACGCGCCGATCATGTCAGCTTCAATGGCTATGAGCGCGATACTTTCCACAGCTTGC  
CAAGATCGATGGCGTGACCAATTTTAGCAATGTCACATCGTGCGGCACATCGACGGCGTATTCTGTGCCGTGTATGTTCA

GCTATCTGGGCGCGGATGAGTATGATGTGCGATACCGCCAAATACCAAGAAAATGTGCTGGATACGCTGGATCGCTTGGGC  
GTAAGTATCTTGTGGCGTGATAATAATTCGGACTCAAAAGGCGTGATGGATAAGCTGCCAAAAGCGCAATTTGCCGATTA  
TAAATCCGCGACCAACAACGCCATCTGCAACACCAATCCTTATAACGAATGCCGCGATGTCGGTATGCTCGTTGGCTTAG  
ATGACTTTGTGCTGCCAATAACGGCAAAGATATGCTGATCATGCTGCACCAAATGGGCAATCACGGGCCTGCGTATTTT  
AAGCGATATGATGAAAAGTTTGCCAAATTCACGCCAGTGTGTGAAGGTAATGAGCTTGCCAAGTGCGAACATCAGTCCTT  
GATCAATGCTTATGACAATGCCTTGCTTGCCACCGATGATTTTCATCGCTCAAAGTATCCAGTGGCTGCAGACGCACAGCA  
ATGCCTATGATGTCTCAATGCTGTATGTCAGCGATCATGGCGAAAGTCTGGGTGAGAACGGTGTCTATCTACATGGTATG  
CCAAATGCCTTTGCACCAAAAAGAACAGCGCAGTGTGCCTGCATTTTTCTGGACGGATAAGCAAACCTGGCATCACGCCAAT  
GGCAACCGATACCGTCCTGACCCATGACGCGATCACGCCGACATTATTAAAGCTGTTTGATGTCACCGCGGACAAAGTCA  
AAGACCGCACCGCATTTCATCCGCTGA

>KY780959.1 Escherichia coli strain LV23529 phosphoethanolamine-lipid A transferase MCR-1.9 (mcr-1.9) gene, complete cds

ATGATGCAGCATACTTCTGTGTGGTACCGACGCTCGGTCAGTCCGTTTGTTCTTGTGGCGAGTGTTGCCGTTTTCTTGAC  
CGCGACCGCCAATCTTACCTTTTTTGATAAAATCAGCCAAACCTATCCCATCGCGGACAATCTCGGCTTTGTGCTGACGA  
TCGCTGTCGTGCTCTTTGGCGCGATGCTACTGATCACACGCTGTTATCATCGTATCGCTATGTGCTAAAGCCTGTGTTG  
ATTTTGCTATTAATCATGGGCGCGGTGACCAGTTATTTTACTGACACTTATGGCACGGTCTATGATACGACCATGCTCCA  
AAATGCCCTACAGACCGACCAAGCCGAGACCAAGGATCTATTAAACGCAGCGTTTATCATGCGTATCATTGGTTTGGGTG  
TGCTACCAAGTTTGCTTGTGGCTTTTGTTAAGGTGGATTATCCGACTTGGGGCAAGGGTTTGATGCGCCGATTGGGCTTG  
ATCGTGGCAAGTCTTGCGCTGATTTTACTGCCTGTGGTGGCGTTCAGCAGTCATTATGCCAGTTTCTTTGCGGTGCATAA  
GCCGCTGCGTAGCTATGTCAATCCGATCATGCCAATCTACTCGGTGGGTAAGCTTGCCAGTATTGAGTATAAAAAAGCCA

GTGCGCCAAAAGATACCATTTATCACGCCAAAGACGCGGTACAAGCAACCAAGCCTGATATGCGTAAGCCACGCCTAGTG  
GTGTTTCGTCGTCGGTGAGACGGCACGCGCCGATCATGTCAGCTTCAATGGCTATGAGCGCGATACTTTCCCACAGCTTGC  
CAAGATCGATGGCGTGACCAATTTTAGCAATGTCACATCGTGCGGCACATCGACGGCGTATTCTGTGCCGTGTATGTTCA  
GCTATCTGGGCGCGGATGAGTATGATGTCGATACCGCCAAATACCAAGAAAATGTGCTGGATACGCTGGATCGCTTGGGC  
GTAAGTATCTTGTGGCGTGATAATAATTCGGACTCAAAGGCGTGATGGATAAGCTGCCAAAAGCGCAATTTGCCGATTA  
TAAATCCGCGACCAACAACGCCATCTGCAACACCAATCCTTATAACGAATGCCGCGATGTCGGTATGCTCGTTGGCTTAG  
ATGACTTTGTGCTGCCAATAACGGCAAAGATATGCTGATCATGCTGCACCAAATGGGCAATCACGGGCCTGCGTATTTT  
AAGCGATATGATGAAAAGTTTGCCAAATTCACGCCAGCGTGTGAAGGTAATGAGCTTGCCAAGTGCGAACATCAGTCCTT  
GATCAATGCTTATGACAATGCCTTGCTTGCCACCGATGATTTTCATCGCTCAAAGTATCCAGTGGCTGCAGACGCACAGCA  
ATGCCTATGATGTCTCAATGCTGTATGTCAGCGATCATGGCGAAAGTCTGGGTGAGAACGGTGTCTATCTACATGGTATG  
CCAAATGCCTTTGCACCAAAAGAACAGCGCAGTGTGCCTGCATTTTTCTGGACGGATAAGCAAACCTGGCATCACGCCAAT  
GGCAACCGATACCGTCCTGACCCATGACGCGATCACGCCGACATTATTAAAGCTGTTTGATGTCACCGCGGACAAAGTCA  
AAGACCGCACCGCATTTCATCCGCTGA

>MG517528.1 Escherichia coli strain B11 plasmid pBF123 phosphoethanolamine transferase (mcr-1) gene, partial cds

GCGGATGAATGCGGTGCGGTCTTTGACTTTGTCCGCGGTGACATCAAACAGCTTTAATAATGTCGGCGTGATCGCGTCAT  
GGGTCAGGACGGTATCGGTTGCCATTGGCGTGATGCCAGTTTGCTTATCCGTCCAGAAAAATGCAGGCACACTGCGCTGT  
TCTTTTGGTGCAAAGGCATTTGGCATAACCATGTAGATAGACACCGTTCTCACCCAGACTTTTCGCCATGATCGCTGACATA  
CAGCATTGAGACATCATAGGCATTGCTGTGCGTCTGCAGCCACTGGATACTTTGAGCGATGAAATCATCGGTGGCAAGCA  
AGGCATTGTCATAAGCATTGATCAAGGACTGATGTTTCGCACTTGGCAAGCTCATTACCTTCACACACTGGCGTGAATTTG

GCAAAC TTTTCATCATATCGCTTAAAATACGCAGGCCCGTGATTGCCCATTTGGTGCAGCATGATCAGCATATCTTTGCC  
GTTATTGGCAGCGACAAAGTCATCTAAGCCAACGAGCATACCGACATCGCGGCATTCGTTATAAGGATTGGTGTTCAGA  
TGGCGTTGTTGGTCGCGGATTTATAATCGGCAAATTGCGCTTTTGGCAGCTTATCCATCACGCCTTTTGAGTCCGAATTA  
TTATCACGCCACAAGATACTTACGCCCAAGCGATCCAGCGTATCCAGCACATTTTCTTGGTATTTGGCGGTATCGACATC  
ATACTCATCCGCGCCCAGATAGCTGAACATACACGGCACAGAATACGCCGTCGATGTGCCGCACGATGTGACATTGCTAA  
AATTGGTCACGCCATCGATCTTGGCAAGCTGTGGGAAAGTATCGCGCTCATAGCCATTGAAGCTGACATGATCGGCGCGT  
GCCGTCTCACCGACGACGAACACCACTAGGCGTGGCTTACGCATATCAGGCTTGGTTGCTTGTACCGCGTCTTTGGCGTG  
ATAAATGGTATCTTTTGGCGCACTGGCTTTTTTATACTCAATACTGGCAAGCTTACCCACCGAGTAGATTGGCATGATCG  
GATTGACATAGCTACGCAGCGGCTTATGCACGCGAAAGAACTGGCATAATGACTGCTGAACGCCACCACAGGCAGTAAA  
ATCAGCGCAAGACTTGCCACGATCAAGCCCAATCGGCGCATCAAACCCTTGCCCCAAGTCGGATAATCCACCTTAACAAA  
AGCCACAAGCAAACCTTGGTAGCACACCCAAACCAATGATACGCATGATAAACGCTGCGTTTAATAGATCCTTGGTCTCGG  
CTTGGTCGGTCTGTAGGGCATT TTTGGAGCATGGTCGTATCATAGACCGTGCCATAAGTGTCAGTAAAATAACTGGTCACC  
GCGCCCATGATTAATAGCAAAATCAACACAGGCTTTAGCACATAGCGATACGATGATAACAGCGTGGTGATCAGTAGCAT  
CGCGCCAAAGAGCACGACAGCGATCGTCAGCACAAAGCCGAGATTGTCCGCGATGGGATAGGTTTGGCTGATTTTATCAA  
AAAAGGTAAGATTGGCGGTGCGGGTCAAGAAAACGGCAACACTCGCCACAAGAACAAACGGACTGACCGAGCGTCCGTA  
C

CACACAGAAGTATGCTGCATCAT

>LC337668.1 Escherichia coli EC15-101 mcr-1 gene for phosphoethanolamine--lipid A transferase MCR-1.12, complete cds

ATGATGCACCATACTTCTGTGTGGTACCGACGCTCGGTGAGTCCGTTTGTTCTTGTGGCGAGTGTTGCCGTTTTCTTGAC  
CGCGACCGCCAATCTTACCTTTTTTGATAAAATCAGCCAAACCTATCCCATCGCGGACAATCTCGGCTTTGTGCTGACGA

TCGCTGTCGTGCTCTTTGGCGCGATGCTACTGATCACCACGCTGTTATCATCGTATCGCTATGTGCTAAAGCCTGTGTTG  
ATTTTGCTATTAATCATGGGCGCGGTGACCAGTTATTTTACTGACACTTATGGCACGGTCTATGATACGACCATGCTCCA  
AAATGCCCTACAGACCGACCAAGCCGAGACCAAGGATCTATTAACGCAGCGTTTATCATGCGTATCATTGGTTTGGGTG  
TGCTACCAAGTTTGCTTGTGGCTTTTGTTAAGGTGGATTATCCGACTTGGGGCAAGGGTTTGATGCGCCGATTGGGCTTG  
ATCGTGGCAAGTCTTGCGCTGATTTTACTGCCTGTGGTGGCGTTCAGCAGTCATTATGCCAGTTTCTTTCGCGTGCATAA  
GCCGCTGCGTAGCTATGTCAATCCGATCATGCCAATCTACTCGGTGGGTAAAGCTTGCCAGTATTGAGTATAAAAAAGCCA  
GTGCGCCAAAAGATACCATTTATCACGCCAAAGACGCGGTACAAGCAACCAAGCCTGATATGCGTAAGCCACGCCTAGTG  
GTGTTTCGTCGTGCGTGAGACGGCACGCGCCGATCATGTCAGCTTCAATGGCTATGAGCGCGATACTTTCCCACAGCTTGC  
CAAGATCGATGGCGTGACCAATTTTAGCAATGTCACATCGTGCGGCACATCGACGGCGTATTCTGTGCCGTGTATGTTCA  
GCTATCTGGGCGCGGATGAGTATGATGTCGATACCGCCAAATACCAAGAAAATGTGCTGGATACGCTGGATCGCTTGGGC  
GTAAGTATCTTGTGGCGTGATAATAATTCGGACTCAAAAGGCGTGATGGATAAGCTGCCAAAAGCGCAATTTGCCGATTA  
TAAATCCGCGACCAACAACGCCATCTGCAACACCAATCCTTATAACGAATGCCGCGATGTCGGTATGCTCGTTGGCTTAG  
ATGACTTTGTCGCTGCCAATAACGGCAAAGATATGCTGATCATGCTGCACCAAATGGGCAATCACGGGCCTGCGTATTTT  
AAGCGATATGATGAAAAGTTTGCCAAATTCACGCCAGTGTGTGAAGGTAATGAGCTTGCCAAGTGCGAACATCAGTCCTT  
GATCAATGCTTATGACAATGCCTTGCTTGCCACCGATGATTTTCATCGCTCAAAGTATCCAGTGGCTGCAGACGCACAGCA  
ATGCCTATGATGTCTCAATGCTGTATGTCAGCGATCATGGCGAAAGTCTGGGTGAGAACGGTGTCTATCTACATGGTATG  
CCAAATGCCTTTGCACCAAAAGAACAGCGCAGTGTGCCTGCATTTTTCTGGACGGATAAGCAAACCTGGCATCACGCCAAT  
GGCAACCGATACCGTCCTGACCCATGACGCGATCACGCCGACATTATTAAAGCTGTTTGATGTCACCGCGGACAAAGTCA  
AAGACCGCACCGCATTTCATCCGCTGA

>KY271416.1 Escherichia coli strain Ec1670 phosphoethanolamine--lipid A transferase MCR-1.5 (mcr-1) gene, mcr-1.5 allele, complete cds

ATGATGCAGCATACTTCTGTGTGGTACCGACGCTCGGTCACTCCGTTTGTTCCTTGTGGCGAGTGTTGCCGTTTTCTTGAC  
CGCGACCGCCAATCTTACCTTTTTTGATAAAATCAGCCAAACCTATCCCATCGCGGACAATCTCGGCTTTGTGCTGACGA  
TCGCTGTCGTGCTCTTTGGCGCGATGCTACTGATCACCACGCTGTTATCATCGTATCGCTATGTGCTAAAGCCTGTGTTG  
ATTTTGCTATTAATCATGGGCGCGGTGACCAGTTATTTTACTGACACTTATGGCACGGTCTATGATACGACCATGCTCCA  
AAATGCCCTACAGACCGACCAAGCCGAGACCAAGGATCTATTAAACGCAGCGTTTATCATGCGTATCATTGGTTTGGGTG  
TGCTACCAAGTTTGCTTGTGGCTTTTGTTAAGGTGGATTATCCGACTTGGGGCAAGGGTTTGATGCGCCGATTGGGCTTG  
ATCGTGGCAAGTCTTGCGCTGATTTTACTGCCTGTGGTGGCGTTCAGCAGTCATTATGCCAGTTTCTTTCGCGTGCATAA  
GCCGCTGCGTAGCTATGTCAATCCGATCATGCCAATCTACTCGGTGGGTAAAGCTTGCCAGTATTGAGTATAAAAAAGCCA  
GTGCGCCAAAAGATACCATTATCACGCCAAAGACGCGGTACAAGCAACCAAGCCTGATATGCGTAAGCCACGCCTAGTG  
GTGTTTCGTCGTCGGTGAGACGGCACGCGCCGATCATGTCAGCTTCAATGGCTATGAGCGCGATACTTTCCACAGCTTGC  
CAAGATCGATGGCGTGACCAATTTTAGCAATGTCACATCGTGCGGCACATCGACGGCGTATTCTGTGCCGTGTATGTTCA  
GCTATCTGGGCGCGGATGAGTATGATGTGCGATACCGCCAAATACCAAGAAAATGTGCTGGATACGCTGGATCGCTTGGGC  
GTAAGTATCTTGTGGCGTGATAATAATTCGGACTCAAAAGGCGTGATGGATAAGCTGCCAAAAGCGCAATTTGCCGATTA  
TAAATCCGCGACCAACAACGCCATCTGCAACACCAATCCTTATAACGAATGCCGCGATGTCCGTATGCTCGTTGGCTTAG  
ATGACTTTGTGCTGCCAATAACGGCAAAGATATGCTGATCATGCTGCACCAAATGGGCAATCACGGGCCTGCGTATTTT  
AAGCGATATGATGAAAAGTTTGCCAAATTCACGCCAGTGTGTGAAGGTAATGAGCTTGCCAAGTGCGAACATCAGTCCTT  
GATCAATGCTTATGACAATGCCTTGCTTGCCACCGATGATTTTCATCGCTCAAAGTATCCAGTGGCTGCAGACGTACAGCA  
ATGCCTATGATGTCTCAATGCTGTATGTCAGCGATCATGGCGAAAGTCTGGGTGAGAACGGTGTCTATCTACATGGTATG



CCAAATGCCTTTGCACCAAAAGAACAGCGCAGTGTGCCTGCATTTTTCTGGACGGATAAGCAAACCTGGCATCACGCCAAT  
GGCAACCGATACCGTCCTGACCCATGACGCGATCACGCCGACATTATTAAAGCTGTTTGATGTCACCGCGGACAAAGTCA  
AAGACCGCACCGCATTTCATCCGCTGA

>NG\_055582.1 Escherichia coli LV23529 pLV23529-MCR-1.9 mcr-1 gene for phosphoethanolamine--lipid A transferase MCR-1.9,  
complete CDS

CGCATAATTTTTTATATCAGATAAATTGTACTGGATTTCTTAAAAAATTGCAGTATAATTGCCGCAATTATCCCACCGTT  
TATTTTTTGAGTAGTTTCTCATGATGCAGCATACTTCTGTGTGGTACCGACGCTCGGTCAGTCCGTTTGTTCTTGTGGCG  
AGTGTTGCCGTTTTCTTGACCGCGACCGCCAATCTTACCTTTTTTGATAAAATCAGCCAAACCTATCCCATCGCGGACAA  
TCTCGGCTTTGTGCTGACGATCGCTGTCGTGCTCTTTGGCGCGATGCTACTGATCACCACGCTGTTATCATCGTATCGCT  
ATGTGCTAAAGCCTGTGTTGATTTTGCTATTAATCATGGGCGCGGTGACCAGTTATTTTACTGACACTTATGGCACGGTC  
TATGATACGACCATGCTCCAAAATGCCCTACAGACCGACCAAGCCGAGACCAAGGATCTATTAAACGCAGCGTTTATCAT  
GCGTATCATTGGTTTGGGTGTGCTACCAAGTTTGCTTGTGGCTTTTGTTAAGGTGGATTATCCGACTTGGGGCAAGGGTT  
TGATGCGCCGATTGGGCTTGATCGTGGCAAGTCTTGCGCTGATTTTACTGCCTGTGGTGGCGTTCAGCAGTCATTATGCC  
AGTTTCTTTCGCGTGCATAAGCCGCTGCGTAGCTATGTCAATCCGATCATGCCAATCTACTCGGTGGGTAAGCTTGCCAG  
TATTGAGTATAAAAAAGCCAGTGCGCCAAAAGATAACCATTTATCACGCCAAAGACGCGGTACAAGCAACCAAGCCTGATA  
TGCGTAAGCCACGCCTAGTGGTGTTTCGTTCGTTCGGTGAGACGGCACGCGCCGATCATGTCAGCTTCAATGGCTATGAGCGC  
GATACTTTCCACAGCTTGCCAAGATCGATGGCGTGACCAATTTTAGCAATGTCACATCGTGCGGCACATCGACGGCGTA  
TTCTGTGCCGTGTATGTTTCAGCTATCTGGGCGCGGATGAGTATGATGTCGATACCGCCAAATACCAAGAAAATGTGCTGG  
ATACGCTGGATCGCTTGGGCGTAAGTATCTTGTGGCGTGATAATAATTCGGACTCAAAGGCGTGATGGATAAGCTGCCA  
AAAGCGCAATTTGCCGATTATAAATCCGCGACCAACAACGCCATCTGCAACACCAATCCTTATAACGAATGCCGCGATGT

CGGTATGCTCGTTGGCTTAGATGACTTTGTCGCTGCCAATAACGGCAAAGATATGCTGATCATGCTGCACCAAATGGGCA  
ATCACGGGCCTGCGTATTTTAAGCGATATGATGAAAAGTTTGCCAAATTCACGCCAGCGTGTGAAGGTAATGAGCTTGCC  
AAGTGCGAACATCAGTCCTTGATCAATGCTTATGACAATGCCTTGCTTGCCACCGATGATTCATCGCTCAAAGTATCCA  
GTGGCTGCAGACGCACAGCAATGCCTATGATGTCTCAATGCTGTATGTCAGCGATCATGGCGAAAGTCTGGGTGAGAACG  
GTGTCTATCTACATGGTATGCCAAATGCCTTTGCACCAAAAGAACAGCGCAGTGTGCCTGCATTTTTCTGGACGGATAAG  
CAAAGTGGCATCACGCCAATGGCAACCGATACCGTCCTGACCCATGACGCGATCACGCCGACATTATTAAAGCTGTTTGA  
TGTCACCGCGGACAAAGTCAAAGACCGCACCGCATTTCATCCGCTGATTTCTCCCTGTATTTTTTCCAAACCCACCGCACA  
CTCCATTTCGTATTATGGGCGGTGGGGTGGGGTTTGTATGCCGTATTTATCAAATAAACGCCTACT

>KY400027.1 Escherichia coli strain M4 Mcr-1.3 (mcr-1.3) gene, complete cds

ATGATGCAGCATACTTCTGTGTGGTACCGACGCTCGGTTCAGTCCGTTGGTTCTTGTGGCGAGTGTTGCCGTTTTCTTGAC  
CGCGACCGCCAATCTTACCTTTTTTGATAAAATCAGCCAAACCTATCCCATCGCGGACAATCTCGGCTTTGTGCTGACGA  
TCGCTGTCGTGCTCTTTGGCGCGATGCTACTGATCACCACGCTGTTATCATCGTATCGCTATGTGCTAAAGCCTGTGTTG  
ATTTTGCTATTAATCATGGGCGCGGTGACCAGTTATTTTACTGACACTTATGGCACGGTCTATGATACGACCATGCTCCA  
AAATGCCCTACAGACCGACCAAGCCGAGACCAAGGATCTATTAAACGCAGCGTTTATCATGCGTATCATTGGTTTGGGTG  
TGCTACCAAGTTTGCTTGTGGCTTTTGTTAAGGTGGATTATCCGACTTGGGGCAAGGGTTTGATGCGCCGATTGGGCTTG  
ATCGTGGCAAGTCTTGCGCTGATTTTACTGCCTGTGGTGGCGTTCAGCAGTCATTATGCCAGTTTCTTTTCGCGTGCATAA  
GCCGCTGCGTAGCTATGTCAATCCGATCATGCCAATCTACTCGGTGGGTAAAGCTTGCCAGTATTGAGTATAAAAAAGCCA  
GTGCGCCAAAAGATACCATTATCACGCCAAAGACGCGGTACAAGCAACCAAGCCTGATATGCGTAAGCCACGCCTAGTG  
GTGTTTCGTGTCGGTGAGACGGCACGCGCCGATCATGTCAGCTTCAATGGCTATGAGCGCGATACTTTCCACAGCTTGC

CAAGATCGATGGCGTGACCAATTTTAGCAATGTCACATCGTGCGGCACATCGACGGCGTATTCTGTGCCGTGTATGTTCA  
GCTATCTGGGCGCGGATGAGTATGATGTCGATACCGCCAAATACCAAGAAAATGTGCTGGATACGCTGGATCGCTTGGGC  
GTAAGTATCTTGTGGCGTGATAATAATTCGGACTCAAAAGGCGTGATGGATAAGCTGCCAAAAGCGCAATTTGCCGATTA  
TAAATCCGCGACCAACAACGCCATCTGCAACACCAATCCTTATAACGAATGCCGCGATGTCGGTATGCTCGTTGGCTTAG  
ATGACTTTGTGCTGCCAATAACGGCAAAGATATGCTGATCATGCTGCACCAAATGGGCAATCACGGGCCTGCGTATTTT  
AAGCGATATGATGAAAAGTTTGCCAAATTCACGCCAGTGTGTGAAGGTAATGAGCTTGCCAAGTGCGAACATCAGTCCTT  
GATCAATGCTTATGACAATGCCTTGCTTGCCACCGATGATTTTCATCGCTCAAAGTATCCAGTGGCTGCAGACGCACAGCA  
ATGCCTATGATGTCTCAATGCTGTATGTCAGCGATCATGGCGAAAGTCTGGGTGAGAACGGTGTCTATCTACATGGTATG  
CCAAATGCCTTTGCACCAAAAAGAACAGCGCAGTGTGCCTGCATTTTTCTGGACGGATAAGCAAACCTGGCATCACGCCAAT  
GGCAACCGATACCGTCCTGACCCATGACGCGATCACGCCGACATTATTAAAGCTGTTTGATGTCACCGCGGACAAAGTCA  
AAGACCGCACCGCATTCATCCGCTGA

>NG\_054697.1 Escherichia coli ST101 mcr-1 gene for phosphoethanolamine--lipid A transferase MCR-1.8, complete CDS

ATGATGCGGCATACTTCTGTGTGGTACCGACGCTCGGTCAGTCCGTTTGTTCCTTGTGGCGAGTGTTGCCGTTTTCTTGAC  
CGCGACCGCCAATCTTACCTTTTTTGATAAAATCAGCCAAACCTATCCCATCGCGGACAATCTCGGCTTTGTGCTGACGA  
TCGCTGTCGTGCTCTTTGGCGCGATGCTACTGATCACCACGCTGTTATCATCGTATCGCTATGTGCTAAAGCCTGTGTTG  
ATTTTGCTATTAATCATGGGCGCGGTGACCAGTTATTTTACTGACACTTATGGCACGGTCTATGATACGACCATGCTCCA  
AAATGCCCTACAGACCGACCAAGCCGAGACCAAGGATCTATTAAACGCAGCGTTTATCATGCGTATCATTGGTTTGGGTG  
TGCTACCAAGTTTGCTTGTGGCTTTTGTTAAGGTGGATTATCCGACTTGGGGCAAGGGTTTGATGCGCCGATTGGGCTTG  
ATCGTGGCAAGTCTTGCGCTGATTTTACTGCCTGTGGTGGCGTTCAGCAGTCATTATGCCAGTTTCTTTTCGCGTGCATAA

GCCGCTGCGTAGCTATGTCAATCCGATCATGCCAATCTACTCGGTGGGTAAGCTTGCCAGTATTGAGTATAAAAAAGCCA  
GTGCGCCAAAAGATACCATTTATCACGCCAAAGACGCGGTACAAGCAACCAAGCCTGATATGCGTAAGCCACGCCTAGTG  
GTGTTTCGTCGTCGGTGAGACGGCACGCGCCGATCATGTCAGCTTCAATGGCTATGAGCGCGATACTTTCCCACAGCTTGC  
CAAGATCGATGGCGTGACCAATTTTAGCAATGTCACATCGTGCGGCACATCGACGGCGTATTCTGTGCCGTGTATGTTCA  
GCTATCTGGGCGCGGATGAGTATGATGTGCGATACCGCCAAATACCAAGAAAATGTGCTGGATACGCTGGATCGCTTGGGC  
GTAAGTATCTTGTGGCGTGATAATAATTCGGACTCAAAAGGCGTGATGGATAAGCTGCCAAAAGCGCAATTTGCCGATTA  
TAAATCCGCGACCAACAACGCCATCTGCAACACCAATCCTTATAACGAATGCCGCGATGTCGGTATGCTCGTTGGCTTAG  
ATGACTTTGTGCGCTGCCAATAACGGCAAAGATATGCTGATCATGCTGCACCAAATGGGCAATCACGGGCCTGCGTATTTT  
AAGCGATATGATGAAAAGTTTGCCAAATTCACGCCAGTGTGTGAAGGTAATGAGCTTGCCAAGTGCGAACATCAGTCCTT  
GATCAATGCTTATGACAATGCCTTGCTTGCCACCGATGATTTTCATCGCTCAAAGTATCCAGTGGCTGCAGACGCACAGCA  
ATGCCTATGATGTCTCAATGCTGTATGTCAGCGATCATGGCGAAAGTCTGGGTGAGAACGGTGTCTATCTACATGGTATG  
CCAAATGCCTTTGCACCAAAAGAACAGCGCAGTGTGCCTGCATTTTTCTGGACGGATAAGCAAACCTGGCATCACGCCAAT  
GGCAACCGATACCGTCCTGACCCATGACGCGATCACGCCGACATTATTAAAGCTGTTTGATGTCACCGCGGACAAAGTCA  
AAGACCGCACCGCATTTCATCCGCTGA

>NG\_054678.1 Escherichia coli WCHEC1604 mcr-1 gene for phosphoethanolamine--lipid A transferase MCR-1.7, complete CDS

ATGATGCAGCATACTTCTGTGTGGTACCGACGCTCGGTTCAGTCCGTTTGTTCCTTGTGGCGAGTGTTGCCGTTTTCTTGAC  
CGCGACCGCCAATCTTACCTTTTTTGATAAAATCAGCCAAACCTATCCCATCGCGGACAATCTCGGCTTTGTGCTGACGA  
TCGCTGTCGTGCTCTTTGGCGCGATGCTACTGATCACCACGCTGTTATCATCGTATCGCTATGTGCTAAAGCCTGTGTTG  
ATTTTGCTATTAATCATGGGCGCGGTGACCAGTTATTTTACTGACACTTATGGCACGGTCTATGATACGACCATGCTCCA

AAATGCCCTACAGACCGACCAAGCCGAGACCAAGGATCTATTAAACGCAGCGTTTATCATGCGTATCATTGGTTTGGGTG  
TGCTACCAAGTTTGCTTGTGGCTTTTGTAAAGGTGGATTATCCGACTTGGGGCAAGGGTTTGATGCGCCGATTGGGCTTG  
ATCGTGGCAAGTCTTGCGCTGATTTTACTGCCTGTGGTGGCGTTCAGCAGTCATTATGCCAGTTTCTTTCGCGTGCATAA  
GCCGCTGCGTAGCTATGTCAATCCGATCATGCCAATCTACTCGGTGGGTAAAGCTTGCCAGTATTGAGTATAAAAAAGCCA  
GTACGCCAAAAGATACCATTTATCACGCCAAAGACGCGGTACAAGCAACCAAGCCTGATATGCGTAAGCCACGCCTAGTG  
GTGTTTCGTCGTCGGTGAGACGGCACGCGCCGATCATGTCAGCTTCAATGGCTATGAGCGCGATACTTTCCACAGCTTGC  
CAAGATCGATGGCGTGACCAATTTTAGCAATGTCACATCGTGCGGCACATCGACGGCGTATTCTGTGCCGTGTATGTTCA  
GCTATCTGGGCGCGGATGAGTATGATGTCGATACCGCCAAATACCAAGAAAATGTGCTGGATACGCTGGATCGCTTGGGC  
GTAAGTATCTTGTGGCGTGATAATAATTCGGA CTCAAAGGCGTGATGGATAAGCTGCCAAAAGCGCAATTTGCCGATTA  
TAAATCCGCGACCAACAACGCCATCTGCAACACCAATCCTTATAACGAATGCCGCGATGTCGGTATGCTCGTTGGCTTAG  
ATGACTTTGTGCTGCCAATAACGGCAAAGATATGCTGATCATGCTGCACCAAATGGGCAATCACGGGCCTGCGTATTTT  
AAGCGATATGATGAAAAGTTTGCCAAATTCACGCCAGTGTGTGAAGGTAATGAGCTTGCCAAGTGCGAACATCAGTCCTT  
GATCAATGCTTATGACAATGCCTTGCTTGCCACCGATGATTTTCATCGCTCAAAGTATCCAGTGGCTGCAGACGCACAGCA  
ATGCCTATGATGTCTCAATGCTGTATGTCAGCGATCATGGCGAAAGTCTGGGTGAGAACGGTGTCTATCTACATGGTATG  
CCAAATGCCTTTGCACCAAAAGAACAGCGCAGTGTGCCTGCATTTTTCTGGACGGATAAGCAAACCTGGCATCACGCCAAT  
GGCAACCGATACCGTCCTGACCCATGACGCGATCACGCCGACATTATTAAAGCTGTTTGATGTCACCGCGGACAAAGTCA  
AAGACCGCACCGCATTTCATCCGCTGA

>KY685071.1 Escherichia coli strain HKSH\_MCR\_161114268\_EC phosphoethanolamine lipid A transferase (mcr1) gene, mcr1.9 allele, complete cds

ATGATGCAGCATACTTCTGTGTGGTATCGACGCTCGGTCAGTCCGTTTGTCTTGTGGCGAGTGTTGCCGTTTTCTTGAC

CGCGACCGCCAATCTTACCTTTTTTGATAAAATCAGCCAAACCTATCCCATCGCGGACAATCTCGGCTTTGTGCTGACGA  
TCGCTGTCGTGCTCTTTGGCGCGATGCTACTGATCACCACGCTGTTATCATCGTATCGCTATGTGCTAAAGCCTGTGTTG  
ATTTTGCTATTAATCATGGGCGCGGTGACCAGTTATTTTACTGACACTTATGGCACGGTCTATGATACGACCATGCTCCA  
AAATGCCCTACAGACCGACCAAGCCGAGACCAAGGATCTATTAACGCAGCGTTTATCATGCGTATCATTGGTTTGGGTG  
TGCTACCAAGTTTGCTTGTGGCTTTTGTTAAGGTGGATTATCCGACTTGGGGCAAGGGTTTGATGCGCCGATTGGGCTTG  
ATCGTGGCAAGTCTTGCGCTGATTTTACTGCCTGTGGTGGCGTTCAGCAGTCATTATGCCAGTTTCTTTCGCGTGCATAA  
GCCGCTGCGTAGCTATGTCAATCCGATCATGCCAATCTACTCGGTGGGTAAAGCTTGCCAGTATTGAGTATAAAAAAGCCA  
GTGCGCCAAAAGATACCATTTATCACGCCAAAGACGCGGTACAAGCAACCAAGCCTGATATGCGTAAGCCACGCCTAGTG  
GTGTTTCGTCGTCGGTGAGACGGCACGCGCCGATCATGTCAGCTTCAATGGCTATGAGCGCGATACTTTCCACAGCTTGC  
CAAGATCGATGGCGTGACCAATTTTAGCAATGTCACATCGTGCGGCACATCGACGGCGTATTCTGTGCCGTGTATGTTCA  
GCTATCTGGGCGCGGATGAGTATGATGTCGATACCGCCAAATACCAAGAAAATGTGCTGGATACGCTGGATCGCTTGGGC  
GTAAGTATCTTGTGGCGTGATAATAATTCGGACTCAAAGGCGTGATGGATAAGCTGCCAAAAGCGCAATTTGCCGATTA  
TAAATCCGCGACCAACAACGCCATCTGCAACACCAATCCTTATAACGAATGCCGCGATGTCGGTATGCTCGTTGGCTTAG  
ATGACTTTGTCGCTGCCAATAACGGCAAAGATATGCTGATCATGCTGCACCAAATGGGCAATCACGGGCCTGCGTATTTT  
AAGCGATATGATGAAAAGTTTGCCAAATTCACGCCAGTGTGTGAAGGTAATGAGCTTGCCAAGTGCGAACATCAGTCCTT  
GATCAATGCTTATGACAATGCCTTGCTTGCCACCGATGATTTTCATCGCTCAAAGTATCCAGTGGCTGCAGACGCACAGCA  
ATGCCTATGATGTCTCAATGCTGTATGTCAGCGATCATGGCGAAAGTCTGGGTGAGAACGGTGTCTATCTACATGGTATG  
CCAAATGCCTTTGCACCAAAAGAACAGCGCAGTGTGCCTGCATTTTTCTGGACGGATAAGCAAACCTGGCATCACGCCAAT  
GGCAACCGATACCGTCCTGACCCATGACGCGATCACGCCGACATTATTAAAGCTGTTTGATGTCACCGCGGACAAAGTCA

AAGACCGCACCGCATTTCATCCGCTGA

>KY683842.1 Escherichia coli strain ST101 phosphoethanolamine transferase (mcr-1.8) gene, complete cds

ATGATGCGGCATACTTCTGTGTGGTACCGACGCTCGGTCTAGTCCGTTTGTTCCTGTGGCGAGTGTTGCCGTTTTCTTGAC  
CGCGACCGCCAATCTTACCTTTTTTTGATAAAATCAGCCAAACCTATCCCATCGCGGACAATCTCGGCTTTGTGCTGACGA  
TCGCTGTCGTGCTCTTTGGCGCGATGCTACTGATCACCACGCTGTTATCATCGTATCGCTATGTGCTAAAGCCTGTGTTG  
ATTTTGCTATTAATCATGGGCGCGGTGACCAGTTATTTTACTGACACTTATGGCACGGTCTATGATACGACCATGCTCCA  
AAATGCCCTACAGACCGACCAAGCCGAGACCAAGGATCTATTAAACGCAGCGTTTATCATGCGTATCATTGGTTTGGGTG  
TGCTACCAAGTTTGCTTGTGGCTTTTGTTAAGGTGGATTATCCGACTTGGGGCAAGGGTTTGATGCGCCGATTGGGCTTG  
ATCGTGGCAAGTCTTGCGCTGATTTTACTGCCTGTGGTGGCGTTCAGCAGTCATTATGCCAGTTTCTTTCGCGTGCATAA  
GCCGCTGCGTAGCTATGTCAATCCGATCATGCCAATCTACTCGGTGGGTAAAGCTTGCCAGTATTGAGTATAAAAAAGCCA  
GTGCGCCAAAAGATACCATTTATCACGCCAAAGACGCGGTACAAGCAACCAAGCCTGATATGCGTAAGCCACGCCTAGTG  
GTGTTTCGTCGTCGGTGAGACGGCACGCGCCGATCATGTCAGCTTCAATGGCTATGAGCGCGATACTTTCCACAGCTTGC  
CAAGATCGATGGCGTGACCAATTTTAGCAATGTCACATCGTGCGGCACATCGACGGCGTATTCTGTGCCGTGTATGTTCA  
GCTATCTGGGCGCGGATGAGTATGATGTGCGATACCGCCAAATACCAAGAAAATGTGCTGGATACGCTGGATCGCTTGGGC  
GTAAGTATCTTGTGGCGTGATAATAATTCGGACTCAAAGGCGTGATGGATAAGCTGCCAAAAGCGCAATTTGCCGATTA  
TAAATCCGCGACCAACAACGCCATCTGCAACACCAATCCTTATAACGAATGCCGCGATGTCGGTATGCTCGTTGGCTTAG  
ATGACTTTGTGCTGCCAATAACGGCAAAGATATGCTGATCATGCTGCACCAAATGGGCAATCACGGGCCTGCGTATTTT  
AAGCGATATGATGAAAAGTTTGCCAAATTCACGCCAGTGTGTGAAGGTAATGAGCTTGCCAAGTGCGAACATCAGTCCTT  
GATCAATGCTTATGACAATGCCTTGCTTGCCACCGATGATTTTCATCGCTCAAAGTATCCAGTGGCTGCAGACGCACAGCA

ATGCCTATGATGTCTCAATGCTGTATGTCAGCGATCATGGCGAAAGTCTGGGTGAGAACGGTGTCTATCTACATGGTATG  
CCAAATGCCTTTGCACCAAAAGAACAGCGCAGTGTGCCTGCATTTTTCTGGACGGATAAGCAAACCTGGCATCACGCCAAT  
GGCAACCGATACCGTCCTGACCCATGACGCGATCACGCCGACATTATTAAAGCTGTTTGATGTCACCGCGGACAAAGTCA  
AAGACCGCACCGCATTTCATCCGCTGA

>NG\_052664.1 Escherichia coli WCHec1606 mcr-1 gene for phosphoethanolamine--lipid A transferase MCR-1.4, complete CDS

ATGATGCAGCATACTTCTGTGTGGTACCGACGCTCGGTTCAGTCCGTTTGTTCCTGTGGCGAGTGTGCGGTTTTCTTGAC  
CGCGACCGCCAATCTTACCTTTTTTGATAAAATCAGCCAAACCTATCCCATCGCGGACAATCTCGGCTTTGTGCTGACGA  
TCGCTGTCGTGCTCTTTGGCGCGATGCTACTGATCACCACGCTGTTATCATCGTATCGCTATGTGCTAAAGCCTGTGTTG  
ATTTTGCTATTAATCATGGGCGCGGTGACCAGTTATTTTACTGACACTTATGGCACGGTCTATGATACGACCATGCTCCA  
AAATGCCCTACAGACCGACCAAGCCGAGACCAAGGATCTATTAAACGCAGCGTTTATCATGCGTATCATTGGTTTGGGTG  
TGCTACCAAGTTTGCTTGTGGCTTTTGTTAAGGTGGATTATCCGACTTGGGGCAAGGGTTTGATGCGCCGATTGGGCTTG  
ATCGTGGCAAGTCTTGCGCTGATTTTACTGCCTGTGGTGGCGTTCAGCAGTCATTATGCCAGTTTCTTTCGCGTGCATAA  
GCCGCTGCGTAGCTATGTCAATCCGATCATGCCAATCTACTCGGTGGGTAAGCTTGCCAGTATTGAGTATAAAAAAGCCA  
GTGCGCCAAAAGATACCATTATACGCCAAAGACGCGGTACAAGCAACCAAGCCTGATATGCGTAAGCCACGCCTAGTG  
GTGTTTCGTCGTCGGTGAGACGGCACGCGCCGATCATGTCAGCTTCAATGGCTATGAGCGCGATACTTTCCACAGCTTGC  
CAAGATCGATGGCGTGACCAATTTTAGCAATGTCACATCGTGCGGCACATCGACGGCGTATTCTGTGCCGTGTATGTTCA  
GCTATCTGGGCGCGGATGAGTATGATGTCGATACCGCCAAATACCAAGAAAATGTGCTGGATACGCTGGATCGCTTGGGC  
GTAAGTATCTTGTGGCGTGATAATAATTCGGACTCAAAGGCGTGATGGATAAGCTGCCAAAAGCGCAATTTGCCGATTA  
TAAATCCGCGACCAACAACGCCATCTGCAACACCAATCCTTATAACGAATGCCGCGATGTCGGTATGCTCGTTGGCTTAG



ATGACTTTGTCGCTGCCAATAACGGCAAAGATATGCTGATCATGCTGCACCAAATGGGCAATCACGGGCCTGCGTATTTT  
AAGCGATATGATGAAAAGTTTGCCAAATTCACGCCAGTGTGTGAAGGTAATGAGCTTGCCAAGTGCGAACATCAGTCCTT  
GATCAATGCTTATGACAATGCCTTGCTTGCCACCGATAATTTTCATCGCTCAAAGTATCCAGTGGCTGCAGACGCACAGCA  
ATGCCTATGATGTCTCAATGCTGTATGTCAGCGATCATGGCGAAAGTCTGGGTGAGAACGGTGTCTATCTACATGGTATG  
CCAAATGCCTTTGCACCAAAAGAACAGCGCAGTGTGCCTGCATTTTTCTGGACGGATAAGCAAACCTGGCATCACGCCAAT  
GGCAACCGATACCGTCCTGACCCATGACGCGATCACGCCGACATTATTAAAGCTGTTTGATGTCACCGCGGACAAAGTCA  
AAGACCGCACCGCATTCATCCGCTGA

>NG\_052663.1 Escherichia coli 1256822 mcr-1 gene for phosphoethanolamine--lipid A transferase MCR-1.5, complete CDS

ATGATGCAGCATACTTCTGTGTGGTACCGACGCTCGGTCAAGTCCGTTTGTTCTTGTGGCGAGTGTTGCCGTTTTCTTGAC  
CGCGACCGCCAATCTTACCTTTTTTGATAAAATCAGCCAAACCTATCCCATCGCGGACAATCTCGGCTTTGTGCTGACGA  
TCGCTGTCGTGCTCTTTGGCGCGATGCTACTGATCACCACGCTGTTATCATCGTATCGCTATGTGCTAAAGCCTGTGTTG  
ATTTTGCTATTAATCATGGGCGCGGTGACCAGTTATTTTACTGACACTTATGGCACGGTCTATGATACGACCATGCTCCA  
AAATGCCCTACAGACCGACCAAGCCGAGACCAAGGATCTATTAAACGCAGCGTTTATCATGCGTATCATTGGTTTGGGTG  
TGCTACCAAGTTTGCTTGTGGCTTTTGTTAAGGTGGATTATCCGACTTGGGGCAAGGGTTTGATGCGCCGATTGGGCTTG  
ATCGTGGCAAGTCTTGCGCTGATTTTACTGCCTGTGGTGGCGTTCAGCAGTCATTATGCCAGTTTCTTTTCGCGTGCATAA  
GCCGCTGCGTAGCTATGTCAATCCGATCATGCCAATCTACTCGGTGGGTAAAGCTTGCCAGTATTGAGTATAAAAAAGCCA  
GTGCGCCAAAAGATACCATTATACGCCAAAGACGCGGTACAAGCAACCAAGCCTGATATGCGTAAGCCACGCCTAGTG  
GTGTTTCGTCGTCGGTGAGACGGCACGCGCCGATCATGTCAGCTTCAATGGCTATGAGCGCGATACTTTCCACAGCTTGC  
CAAGATCGATGGCGTGACCAATTTTAGCAATGTCACATCGTGCGGCACATCGACGGCGTATTCTGTGCCGTGTATGTTCA

GCTATCTGGGCGCGGATGAGTATGATGTGCGATACCGCCAAATACCAAGAAAATGTGCTGGATACGCTGGATCGCTTGGGC  
GTAAGTATCTTGTGGCGTGATAATAATTCGGACTCAAAAGGCGTGATGGATAAGCTGCCAAAAGCGCAATTTGCCGATTA  
TAAATCCGCGACCAACAACGCCATCTGCAACACCAATCCTTATAACGAATGCCGCGATGTCGGTATGCTCGTTGGCTTAG  
ATGACTTTGTCGCTGCCAATAACGGCAAAGATATGCTGATCATGCTGCACCAAATGGGCAATCACGGGCCTGCGTATTTT  
AAGCGATATGATGAAAAGTTTGCCAAATTCACGCCAGTGTGTGAAGGTAATGAGCTTGCCAAGTGCGAACATCAGTCCTT  
GATCAATGCTTATGACAATGCCTTGCTTGCCACCGATGATTTTCATCGCTCAAAGTATCCAGTGGCTGCAGACGTACAGCA  
ATGCCTATGATGTCTCAATGCTGTATGTCAGCGATCATGGCGAAAGTCTGGGTGAGAACGGTGTCTATCTACATGGTATG  
CCAAATGCCTTTGCACCAAAAGAACAGCGCAGTGTGCCTGCATTTTTCTGGACGGATAAGCAAACCTGGCATCACGCCAAT  
GGCAACCGATACCGTCCTGACCCATGACGCGATCACGCCGACATTATTAAAGCTGTTTGATGTCACCGCGGACAAAGTCA  
AAGACCGCACCGCATTTCATCCGCTGA

>KY488488.1 Escherichia coli strain WCHEC1604 phosphoethanolamine--lipid A transferase MCR-1.7 (mcr-1) gene, mcr-1.7 allele, complete cds

ATGATGCAGCATACTTCTGTGTGGTACCGACGCTCGGTCAGTCCGTTTGTTCTTGTGGCGAGTGTTGCCGTTTTCTTGAC  
CGCGACCGCCAATCTTACCTTTTTTGATAAAATCAGCCAAACCTATCCCATCGCGGACAATCTCGGCTTTGTGCTGACGA  
TCGCTGTCGTGCTCTTTGGCGCGATGCTACTGATCACCACGCTGTTATCATCGTATCGCTATGTGCTAAAGCCTGTGTTG  
ATTTTGCTATTAATCATGGGCGCGGTGACCAGTTATTTTACTGACACTTATGGCACGGTCTATGATACGACCATGCTCCA  
AAATGCCCTACAGACCGACCAAGCCGAGACCAAGGATCTATTAAACGCAGCGTTTATCATGCGTATCATTGGTTTGGGTG  
TGCTACCAAGTTTGCTTGTGGCTTTTGTTAAGGTGGATTATCCGACTTGGGGCAAGGGTTTGATGCGCCGATTGGGCTTG  
ATCGTGGCAAGTCTTGCGCTGATTTTACTGCCTGTGGTGGCGTTCAGCAGTCATTATGCCAGTTTCTTTTCGCGTGCATAA  
GCCGCTGCGTAGCTATGTCAATCCGATCATGCCAATCTACTCGGTGGGTAAAGCTTGCCAGTATTGAGTATAAAAAAGCCA

GTACGCCAAAAGATACCATTTATCACGCCAAAGACGCGGTACAAGCAACCAAGCCTGATATGCGTAAGCCACGCCTAGTG  
GTGTTTCGTCGTCGGTGAGACGGCACGCGCCGATCATGTCAGCTTCAATGGCTATGAGCGCGATACTTTCCCACAGCTTGC  
CAAGATCGATGGCGTGACCAATTTTAGCAATGTCACATCGTGCGGCACATCGACGGCGTATTCTGTGCCGTGTATGTTCA  
GCTATCTGGGCGCGGATGAGTATGATGTCGATACCGCCAAATACCAAGAAAATGTGCTGGATACGCTGGATCGCTTGGGC  
GTAAGTATCTTGTGGCGTGATAATAATTCGGACTCAAAGGCGTGATGGATAAGCTGCCAAAAGCGCAATTTGCCGATTA  
TAAATCCGCGACCAACAACGCCATCTGCAACACCAATCCTTATAACGAATGCCGCGATGTCGGTATGCTCGTTGGCTTAG  
ATGACTTTGTGCTGCCAATAACGGCAAAGATATGCTGATCATGCTGCACCAAATGGGCAATCACGGGCCTGCGTATTTT  
AAGCGATATGATGAAAAGTTTGCCAAATTCACGCCAGTGTGTGAAGGTAATGAGCTTGCCAAGTGCGAACATCAGTCCTT  
GATCAATGCTTATGACAATGCCTTGCTTGCCACCGATGATTTTCATCGCTCAAAGTATCCAGTGGCTGCAGACGCACAGCA  
ATGCCTATGATGTCTCAATGCTGTATGTCAGCGATCATGGCGAAAGTCTGGGTGAGAACGGTGTCTATCTACATGGTATG  
CCAAATGCCTTTGCACCAAAAGAACAGCGCAGTGTGCCTGCATTTTTCTGGACGGATAAGCAAACCTGGCATCACGCCAAT  
GGCAACCGATACCGTCCTGACCCATGACGCGATCACGCCGACATTATTAAAGCTGTTTGATGTCACCGCGGACAAAGTCA  
AAGACCGCACCGCATTTCATCCGCTGA

>KX242348.1 Escherichia coli strain A434-59 plasmid phosphoethanolamine-lipid A transferase MCR-1 (mcr-1) gene, complete cds

TGTATGGGATTGCGCAATGATTGCCTAATAAAATTTTTGAAATATTTCTGTATCGCATAATTTTTTATATCAGATAAATT  
GTACTGGATTTCTTAAAAAATTGCAGTATAATTGCCGCAATTATCCCACCGTTTATTTTTTGAGTAGTTTCTCATGATGC  
AGCATACTTCTGTGTGGTATCGACGCTCGGTCAGTCCGTTTGTTCCTGTGGCGAGTGTTGCCGTTTTCTTGACCGCGACC  
GCCAATCTTACCTTTTTTGATAAAATCAGCCAAACCTATCCCATCGCGGACAATCTCGGCTTTGTGCTGACGATCGCTGT  
CGTGCTCTTTGGCGCGATGCTACTGATCACCACGCTGTTATCATCGTATCGCTATGTGCTAAAGCCTGTGTTGATTTTGC

TATTAATCATGGGCGCGGTGACCAGTTATTTTACTGACACTTATGGCACGGTCTATGATACGACCATGCTCCAAAATGCC  
CTACAGACCGACCAAGCCGAGACCAAGGATCTATTAAACGCAGCGTTTATCATGCGTATCATTGGTTTGGGTGTGCTACC  
AAGTTTGCTTGTGGCTTTTGTTAAGGTGGATTATCCGACTTGGGGCAAGGGTTTGATGCGCCGATTGGGCTTGATCGTGG  
CAAGTCTTGCGCTGATTTTACTGCCTGTGGTGGCGTTCAGCAGTCATTATGCCAGTTTCTTTTCGCGTGCATAAGCCGCTG  
CGTAGCTATGTCAATCCGATCATGCCAATCTACTCGGTGGGTAAAGCTTGCCAGTATTGAGTATAAAAAAGCCAGTGCGCC  
AAAAGATACCATTTATCACGCCAAAGACGCGGTACAAGCAACCAAGCCTGATATGCGTAAGCCACGCCTAGTGGTGTTCG  
TCGTCGGTGAGACGGCACGCGCCGATCATGTCAGCTTCAATGGCTATGAGCGCGATACTTTCCACAGCTTGCCAAGATC  
GATGGCGTGACCAATTTTAGCAATGTCACATCGTGCGGCACATCGACGGCGTATTCTGTGCCGTGTATG TTCAGCTATCT  
GGGCGCGGATGAGTATGATGTGCGATACCGCCAAATACCAAGAAAATGTGCTGGATACGCTGGATCGCTTGGGCGTAAGTA  
TCTTGTGGCGTGATAATAATTCGGACTCAAAAGGCGTGATGGATAAGCTGCCAAAAGCGCAATTTGCCGATTATAAATCC  
GCGACCAACAACGCCATCTGCAACACCAATCCTTATAACGAATGCCGCGATGTCGGTATGCTCGTTGGCTTAGATGACTT  
TGTCGCTGCCAATAACGGCAAAGATATGCTGATCATGCTGCACCAAATGGGCAATCACGGGCCTGCGTATTTTAAGCGAT  
ATGATGAAAAGTTTGCCAAATTCACGCCAGTGTGTGAAGGTAATGAGCTTGCCAAGTGCGAACATCAGTCCTTGATCAAT  
GCTTATGACAATGCCTTGCTTGCCACCGATGATTTTCATCGCTCAAAGTATCCAGTGGCTGCAGACGCACAGCAATGCCTA  
TGATGTCTCAATGCTGTATGTCAGCGATCATGGCGAAAGTCTGGGTGAGAACGGTGTCTATCTACATGGTATGCCAAATG  
CCTTTGCACCAAAAGAACAGCGCAGTGTGCCTGCATTTTTCTGGACGGATAAGCAAACCTGGCATCACGCCAATGGCAACC  
GATACCGTCCTGACCCATGACGCGATCACGCCGACATTATTAAAGCTGTTTGATGTCACCGCGGACAAAGTCAAAGACCG  
CACCGCATTTCATCCGCTGATTTCTCCCTGTATTTTTTCCAAACCCACCGCACACTCCATTTCGTATTATGGGCGGTGGGGT  
GGGGTTTGTATGCCGTATTTATCAAATAAACGCCTAC

>KY041856.1 Escherichia coli strain WCHEC1606 phosphoethanolamine--lipid A transferase MCR-1.4 (mcr-1) gene, mcr-1.4 allele, complete cds

ATGATGCAGCATACTTCTGTGTGGTACCGACGCTCGGTCAGTCCGTTTGTTCCTTGTGGCGAGTGTTGCCGTTTTCTTGAC  
CGCGACCGCCAATCTTACCTTTTTTGATAAAATCAGCCAAACCTATCCCATCGCGGACAATCTCGGCTTTGTGCTGACGA  
TCGCTGTCGTGCTCTTTGGCGCGATGCTACTGATCACCACGCTGTTATCATCGTATCGCTATGTGCTAAAGCCTGTGTTG  
ATTTTGCTATTAATCATGGGCGCGGTGACCAGTTATTTTACTGACACTTATGGCACGGTCTATGATACGACCATGCTCCA  
AAATGCCCTACAGACCGACCAAGCCGAGACCAAGGATCTATTAAACGCAGCGTTTATCATGCGTATCATTGGTTTGGGTG  
TGCTACCAAGTTTGCTTGTGGCTTTTGTTAAGGTGGATTATCCGACTTGGGGCAAGGGTTTGATGCGCCGATTGGGCTTG  
ATCGTGGCAAGTCTTGCGCTGATTTTACTGCCTGTGGTGGCGTTCAGCAGTCATTATGCCAGTTTCTTTCGCGTGCATAA  
GCCGCTGCGTAGCTATGTCAATCCGATCATGCCAATCTACTCGGTGGGTAAAGCTTGCCAGTATTGAGTATAAAAAAGCCA  
GTGCGCCAAAAGATACCATTATCACGCCAAAGACGCGGTACAAGCAACCAAGCCTGATATGCGTAAGCCACGCCTAGTG  
GTGTTTCGTCGTCGGTGAGACGGCACGCGCCGATCATGTCAGCTTCAATGGCTATGAGCGCGATACTTTCCACAGCTTGC  
CAAGATCGATGGCGTGACCAATTTTAGCAATGTCACATCGTGCGGCACATCGACGGCGTATTCTGTGCCGTGTATGTTCA  
GCTATCTGGGCGCGGATGAGTATGATGTGCGATACCGCCAAATACCAAGAAAATGTGCTGGATACGCTGGATCGCTTGGGC  
GTAAGTATCTTGTGGCGTGATAATAATTCGGACTCAAAGGCGTGATGGATAAGCTGCCAAAAGCGCAATTTGCCGATTA  
TAAATCCGCGACCAACAACGCCATCTGCAACACCAATCCTTATAACGAATGCCGCGATGTCCGTATGCTCGTTGGCTTAG  
ATGACTTTGTGCTGCCAATAACGGCAAAGATATGCTGATCATGCTGCACCAAATGGGCAATCACGGGCCTGCGTATTTT  
AAGCGATATGATGAAAAGTTTGCCAAATTCACGCCAGTGTGTGAAGGTAATGAGCTTGCCAAGTGCGAACATCAGTCCTT  
GATCAATGCTTATGACAATGCCTTGCTTGCCACCGATAATTTTCATCGCTCAAAGTATCCAGTGGCTGCAGACGCACAGCA  
ATGCCTATGATGTCTCAATGCTGTATGTCAGCGATCATGGCGAAAGTCTGGGTGAGAACGGTGTCTATCTACATGGTATG

CCAAATGCCTTTGCACCAAAAGAACAGCGCAGTGTGCCTGCATTTTTCTGGACGGATAAGCAAACCTGGCATCACGCCAAT  
GGCAACCGATACCGTCCTGACCCATGACGCGATCACGCCGACATTATTAAAGCTGTTTGATGTCACCGCGGACAAAGTCA  
AAGACCGCACCGCATTTCATCCGCTGA

>KY283125.1 Escherichia coli strain 1256822 phosphoethanolamine--lipid A transferase MCR-1.5 (mcr-1) gene, mcr-1.5 allele,  
complete cds

ATGATGCAGCATACTTCTGTGTGGTACCGACGCTCGGTTCAGTCCGTTTGTTCTTGTGGCGAGTGTTGCCGTTTTCTTGAC  
CGCGACCGCCAATCTTACCTTTTTTGATAAAATCAGCCAAACCTATCCCATCGCGGACAATCTCGGCTTTGTGCTGACGA  
TCGCTGTCGTGCTCTTTGGCGCGATGCTACTGATCACCACGCTGTTATCATCGTATCGCTATGTGCTAAAGCCTGTGTTG  
ATTTTGCTATTAATCATGGGCGCGGTGACCAGTTATTTTACTGACACTTATGGCACGGTCTATGATACGACCATGCTCCA  
AAATGCCCTACAGACCGACCAAGCCGAGACCAAGGATCTATTAAACGCAGCGTTTATCATGCGTATCATTGGTTTGGGTG  
TGCTACCAAGTTTGCTTGTGGCTTTTGTTAAGGTGGATTATCCGACTTGGGGCAAGGGTTTGATGCGCCGATTGGGCTTG  
ATCGTGGCAAGTCTTGCGCTGATTTTACTGCCTGTGGTGGCGTTCAGCAGTCATTATGCCAGTTTCTTTCGCGTGCATAA  
GCCGCTGCGTAGCTATGTCAATCCGATCATGCCAATCTACTCGGTGGGTAAGCTTGCCAGTATTGAGTATAAAAAAGCCA  
GTGCGCCAAAAGATAACCATTTATCACGCCAAAGACGCGGTACAAGCAACCAAGCCTGATATGCGTAAGCCACGCCTAGTG  
GTGTTTCGTCGTCGGTGAGACGGCACGCGCCGATCATGTCAGCTTCAATGGCTATGAGCGCGATACTTTCCACAGCTTGC  
CAAGATCGATGGCGTGACCAATTTTAGCAATGTCACATCGTGCGGCACATCGACGGCGTATTCTGTGCCGTGTATGTTCA  
GCTATCTGGGCGCGGATGAGTATGATGTCGATACCGCCAAATACCAAGAAAATGTGCTGGATACGCTGGATCGCTTGGGC  
GTAAGTATCTTGTGGCGTGATAATAATTCGGAATCAAAAGGCGTGATGGATAAGCTGCCAAAAGCGCAATTTGCCGATTA  
TAAATCCGCGACCAACAACGCCATCTGCAACACCAATCCTTATAACGAATGCCGCGATGTCGGTATGCTCGTTGGCTTAG  
ATGACTTTGTCGCTGCCAATAACGGCAAAGATATGCTGATCATGCTGCACCAAATGGGCAATCACGGGCCTGCGTATTTT

AAGCGATATGATGAAAAGTTTGCCAAATTCACGCCAGTGTGTGAAGGTAATGAGCTTGCCAAGTGCGAACATCAGTCCTT  
GATCAATGCTTATGACAATGCCTTGCTTGCCACCGATGATTTTCATCGCTCAAAGTATCCAGTGGCTGCAGACGTACAGCA  
ATGCCTATGATGTCTCAATGCTGTATGTCAGCGATCATGGCGAAAGTCTGGGTGAGAACGGTGTCTATCTACATGGTATG  
CCAAATGCCTTTGCACCAAAAGAACAGCGCAGTGTGCCTGCATTTTTCTGGACGGATAAGCAAACCTGGCATCACGCCAAT  
GGCAACCGATAACCGTCCTGACCCATGACGCGATCACGCCGACATTATTAAAGCTGTTTGATGTCACCGCGGACAAAGTCA  
AAGACCGCACCGCATTTCATCCGCTGA

>MT770924.1 Escherichia coli isolate 1506 phosphoethanolamine--lipid A transferase MCR-1.28 (mcr-1) gene, mcr-1.28 allele,  
complete cds

ATGATGCAGCATACTTCTGTGTGGTACCGACGCTCGGTCAGTCCGTTTGTTCTTGTGGCGAGTGTTGCCGTTTTCTTGAC  
CGCGACCGCCAATCTTACCTTTTTTGATAAAATCAGCCAAACCTATCCCATCGCGGACAATCTCGGCTTTGTGCTGACGA  
TCGCTGTCGTGCTCTTTGGCGCGATGCTACTGATCACCACGCTGTTATCATCGTATCGCTATGTGCTAAAGCCTGTGTTG  
ATTTTGCTATTAATCATGGGCGCGGTGACCAGTTATTTTACTGACACTTATGGCACGGTCTATGATACGACCATGCTCCA  
AAATGCCCTACAGACCGACCAAGCCGAGACCAAGGATCTATTAAACGCAGCGTTTATCATGCGTATCATTGGTTTGGGTG  
TGCTACCAAGTTTGCTTGTGGCTTTTGTTAAGGTGGATTATCCGACTTGGGGCAAGGGTTTGATGCGCCGATTGGGCTTG  
ATCGTGGCAAGTCTTGCGCTGATTTTACTGCCTGTGGTGGCGTTCAGCAGTCATTATGCCAGTTTCTTTGCGGTGCATAA  
GCCGCTGCGTAGCTATGTCAATCCGATCATGCCAATCTACTCGGTGGGTAAAGCTTGCCAGTATTGAGTATAAAAAAGCCA  
ATGCGCCAAAAGATACCATTTATCACGCCAAAGACGCGGTACAAGCAACCAAGCCTGATATGCGTAAGCCACGCCTAGTG  
GTGTTTCGTCGTCGGTGAGACGGCACGCGCCGATCATGTCAGCTTCAATGGCTATGAGCGCGATACTTTCCACAGCTTGC  
CAAGATCGATGGCGTGACCAATTTTAGCAATGTCACATCGTGCGGCACATCGACGGCGTATTCTGTGCCGTGTATGTTCA  
GCTATCTGGGCGCGGATGAGTATGATGTCGATACCGCCAAATACCAAGAAAATGTGCTGGATACGCTGGATCGCTTGGGC

GTAAGTATCTTGTGGCGTGATAATAATTCGGACTCAAAAGGCGTGATGGATAAGCTGCCAAAAGCGCAATTTGCCGATTA  
TAAATCCGCGACCAACAACGCCATCTGCAACACCAATCCTTATAACGAATGCCGCGATGTCGGTATGCTCGTTGGCTTAG  
ATGACTTTTGTGCTGCCAATAACGGCAAAGATATGCTGATCATGCTGCACCAAATGGGCAATCACGGGCCTGCGTATTTT  
AAGCGATATGATGAAAAGTTTGCCAAATTCACGCCAGTGTGTGAAGGTAATGAGCTTGCCAAGTGCGAACATCAGTCCTT  
GATCAATGCTTATGACAATGCCTTGCTTGCCACCGATGATTTTCATCGCTCAAAGTATCCAGTGGCTGCAGACGCACAGCA  
ATGCCTATGATGTCTCAATGCTGTATGTCAGCGATCATGGCGAAAGTCTGGGTGAGAACGGTGTCTATCTACATGGTATG  
CCAAATGCCTTTGCACCAAAAGAACAGCGCAGTGTGCCTGCATTTTTCTGGACGGATAAGCAAACCTGGCATCACGCCAAT  
GGCAACCGATACCGTCCTGACCCATGACGCGATCACGCCGACATTATTAAAGCTGTTTGATGTCACCGCGGACAAAGTCA  
AAGACCGCACCGCATTCATCCGCTGA

>NG\_067237.1 Escherichia coli SAUVM\_E6 mcr-1 gene for phosphoethanolamine--lipid A transferase MCR-1.25, complete CDS

ATGATGCAGCATACTTCTGTGTGGTACCGACGCTCGGTCACTCCGTTTGTTCTTGTGGCGAGTGTTGCCGTTTTCTTGAC  
CGCGACCGCCAATCTTACCTTTTTTGATAAAATCAGCCAAACCTATCCCATCGCGGACAATCTCGGCTTTGTGCTGACGA  
TCGCTGTCGTGCTCTTTGGCGCGATGCTACTGATCACCACGCTGTTATCATCGTATCGCTATGTGCTAAAGCCTGTGTTG  
ATTTTGCTATTAATCATGGGCGCGGTGACCAGTTATTTTACTGACACTTATGGCACGGTCTATGATACGACCATGCTCCA  
AAATGCCCTACAGACCGACCAAGCCGAGACCAAGGATCTATTAAACGCAGCGTTTATCATGCGTATCATTGGTTTGGGTG  
TGCTACCAAGTTTGCTTGTGGCTTTTGTTAAGGTGGATTATCCGACTTGGGGCAAGGGTTTGATGCGCCGATTGGGCTTG  
ATCGTGGCAAGTCTTGCGCTGATTTTACTGCCTGTGGTGGCGTTCAGCAGTCATTATGCCAGTTTCTTTGCGGTGCATAA  
GCCGGTGCGTAGCTATGTCAATCCGATCATGCCAATCTACTCGGTGGGTAAAGCTTGCCAGTATTGAGTATAAAAAAGCCA  
GTGCGCCAAAAGATACCATTATCACGCCAAAGACGCGGTACAAGCAACCAAGCCTGATATGCGTAAGCCACGCCTAGTG



GTGTTGTCGTCGTCGGTGAGACGGCACGCGCCGATCATGTCAGCTTCAATGGCTATGAGCGCGATACTTTCCCACAGCTTGC  
CAAGATCGATGGCGTGACCAATTTTAGCAATGTCACATCGTGCGGCACATCGACGGCGTATTCTGTGCCGTGTATGTTCA  
GCTATCTGGGCGCGGATGAGTATGATGTCGATACCGCCAAATACCAAGAAAATGTGCTGGATACGCTGGATCGCTTGGGC  
GTAAGTATCTTGTGGCGTGATAATAATTCGGACTCAAAAGGCGTGATGGATAAGCTGCCAAAAGCGCAATTTGCCGATTA  
TAAATCCGCGACCAACAACGCCATCTGCAACACCAATCCTTATAACGAATGCCGCGATGTCGGTATGCTCGTTGGCTTAG  
ATGACTTTGTGCGCTGCCAATAACGGCAAAGATATGCTGATCATGCTGCACCAAATGGGCAATCACGGGCCTGCGTATTTT  
AAGCGATATGATGAAAAGTTTGCCAAATTCACGCCAGTGTGTGAAGGTAATGAGCTTGCCAAGTGCGAACATCAGTCCTT  
GATCAATGCTTATGACAATGCCTTGCTTGCCACCGATGATTTTCATCGCTCAAAGTATCCAGTGGCTGCAGACGCACAGCA  
ATGCCTATGATGTCTCAATGCTGTATGTCAGCGATCATGGCGAAAGTCTGGGTGAGAACGGTGTCTATCTACATGGTATG  
CCAAATGCCTTTGCACCAAAAGAACAGCGCAGTGTGCCTGCATTTTTCTGGACGGATAAGCAAACCTGGCATCACGCCAAT  
GGCAACCGATACCGTCCTGACCCATGACGCGATCACGCCGACATTATTAAAGCTGTTTGATGTCACCGCGGACAAAGTCA  
AAGACCGCACCGCATTTCATCCGCTGA

>MN879259.1 Escherichia coli strain SAUVM\_E6 phosphoethanolamine--lipid A transferase MCR-1.25 (mcr-1) gene, mcr-1.25 allele, partial cds

ATGATGCAGCATACTTCTGTGTGGTACCGACGCTCGGTCACTCCGTTTGTTCTTGTGGCGAGTGTTGCCGTTTTCTTGAC  
CGCGACCGCCAATCTTACCTTTTTTGATAAAATCAGCCAAACCTATCCCATCGCGGACAATCTCGGCTTTGTGCTGACGA  
TCGCTGTCGTGCTCTTTGGCGCGATGCTACTGATCACCACGCTGTTATCATCGTATCGCTATGTGCTAAAGCCTGTGTTG  
ATTTTGCTATTAATCATGGGCGCGGTGACCAGTTATTTTACTGACACTTATGGCACGGTCTATGATACGACCATGCTCCA  
AAATGCCCTACAGACCGACCAAGCCGAGACCAAGGATCTATTAAACGCAGCGTTTATCATGCGTATCATTGGTTTGGGTG  
TGCTACCAAGTTTGCTTGTGGCTTTTGTTAAGGTGGATTATCCGACTTGGGGCAAGGGTTTGATGCGCCGATTGGGCTTG

ATCGTGGCAAGTCTTGCGCTGATTTTACTGCCTGTGGTGGCGTTCAGCAGTCATTATGCCAGTTTCTTTCGCGTGCATAA  
GCCGGTGCCTAGCTATGTCAATCCGATCATGCCAATCTACTCGGTGGGTAAGCTTGCCAGTATTGAGTATAAAAAAGCCA  
GTGCGCCAAAAGATACCATTTATCACGCCAAAGACGCGGTACAAGCAACCAAGCCTGATATGCGTAAGCCACGCCTAGTG  
GTGTTTCGTCGTCGGTGAGACGGCACGCGCCGATCATGTCAGCTTCAATGGCTATGAGCGCGATACTTTCCCACAGCTTGC  
CAAGATCGATGGCGTGACCAATTTTAGCAATGTCACATCGTGCGGCACATCGACGGCGTATTCTGTGCCGTGTATGTTCA  
GCTATCTGGGCGCGGATGAGTATGATGTCGATACCGCCAAATACCAAGAAAATGTGCTGGATACGCTGGATCGCTTGGGC  
GTAAGTATCTTGTGGCGTGATAATAATTCGGACTCAAAAGGCGTGATGGATAAGCTGCCAAAAGCGCAATTTGCCGATTA  
TAAATCCGCGACCAACAACGCCATCTGCAACACCAATCCTTATAACGAATGCCGCGATGTCGGTATGCTCGTTGGCTTAG  
ATGACTTTGTGCTGCCAATAACGGCAAAGATATGCTGATCATGCTGCACCAAATGGGCAATCACGGGCCTGCGTATTTT  
AAGCGATATGATGAAAAGTTTGCCAAATTCACGCCAGTGTGTGAAGGTAATGAGCTTGCCAAGTGCGAACATCAGTCCTT  
GATCAATGCTTATGACAATGCCTTGCTTGCCACCGATGATTTTCATCGCTCAAAGTATCCAGTGGCTGCAGACGCACAGCA  
ATGCCTATGATGTCTCAATGCTGTATGTCAGCGATCATGGCGAAAGTCTGGGTGAGAACGGTGTCTATCTACATGGTATG  
CCAAATGCCTTTGCACCAAAAGAACAGCGCAGTGTGCCTGCATTTTTCTGGACGGATAAGCAAACCTGGCATCACGCCAAT  
GGCAACCGATACCGTCCTGACCCATGACGCGATCACGCCGACATTATTAAAGCTGTTTGATGTCACCGCGGACAAAGTCA  
AAGACCGCACCGCATTTCATCCGCTGA

>MF084991.1 Escherichia coli strain N8114 Mcr-1 (mcr-1) gene, mcr-1.9 allele, complete cds

ATGGTGCAGCATACTTCTGTGTGGTACCGACGCTCGGTCCGTTTGTTCCTTGTGGCGAGTGTTGCCGTTTTCTTGAC  
CGCGACCGCCAATCTTACCTTTTTTGATAAAATCAGCCAAACCTATCCCATCGCGGACAATCTCGGCTTTGTGCTGACGA  
TCGCTGTCGTGCTCTTTGGCGCGATGCTACTGATCACCACGCTGTTATCATCGTATCGCTATGTGCTAAAGCCTGTGTTG

ATTTTGCTATTAATCATGGGCGCGGTGACCAGTTATTTTACTGACACTTATGGCACGGTCTATGATACGACCATGCTCCA  
AAATGCCCTACAGACCGACCAAGCCGAGACCAAGGATCTATTAAACGCAGCGTTTATCATGCGTATCATTGGTTTGGGTG  
TGCTACCAAGTTTGCTTGTGGCTTTTGTTAAGGTGGATTATCCGACTTGGGGCAAGGGTTTGATGCGCCGATTGGGCTTG  
ATCGTGGCAAGTCTTGCGCTGATTTTACTGCCTGTGGTGGCGTTCAGCAGTCATTATGCCAGTTTCTTTCGCGTGCATAA  
GCCGCTGCGTAGCTATGTCAATCCGATCATGCCAATCTACTCGGTGGGTAAAGCTTGCCAGTATTGAGTATAAAAAAGCCA  
GTGCGCCAAAAGATACCATTTATCACGCCAAAGACGCGGTACAAGCAACCAAGCCTGATATGCGTAAGCCACGCCTAGTG  
GTGTTTCGTCGTCGGTGAGACGGCACGCGCCGATCATGTCAGCTTCAATGGCTATGAGCGCGATACTTTCCCACAGCTTGC  
CAAGATCGATGGCGTGACCAATTTTAGCAATGTCACATCGTGCGGCACATCGACGGCGTATTCTGTGCCGTGTATGTTCA  
GCTATCTGGGCGCGGATGAGTATGATGTCGATACCGCCAAATACCAAGAAAATGTGCTGGATACGCTGGATCGCTTGGGC  
GTAAGTATCTTGTGGCGTGATAATAATTCGGA CTCAAAGGCGTGATGGATAAGCTGCCAAAAGCGCAATTTGCCGATTA  
TAAATCCGCGACCAACAACGCCATCTGCAACACCAATCCTTATAACGAATGCCGCGATGTCGGTATGCTCGTTGGCTTAG  
ATGACTTTGTCGCTGCCAATAACGGCAAAGATATGCTGATCATGCTGCACCAAATGGGCAATCACGGGCCTGCGTATTTT  
AAGCGATATGATGAAAAGTTTGCCAAATTCACGCCAGTGTGTGAAGGTAATGAGCTTGCCAAGTGCGAACATCAGTCCTT  
GATCAATGCTTATGACAATGCCTTGCTTGCCACCGATGATTTTCATCGCTCAAAGTATCCAGTGGCTGCAGACGCACAGCA  
ATGCCTATGATGTCTCAATGCTGTATGTCAGCGATCATGGCGAAAGTCTGGGTGAGAACGGTGTCTATCTACATGGTATG  
CCAAATGCCTTTGCACCAAAAAGAACAGCGCAGTGTGCCTGCATTTTTCTGGACGGATAAGCAA ACTGGCATCACGCCAAT  
GGCAACCGATACCGTCCTGACCCATGACGCGATCACGCCGACATTATTAAAGCTGTTTGATGTCACCGCGGACAAAGTCA  
AAGACCGCACCGCATTTCATCCGCTGA

>NG\_052861.1 Escherichia coli HeN867 pHeNE867 mcr-1 gene for phosphoethanolamine--lipid A transferase MCR-1.3, complete CDS

CGCATAATTTTTATATCAGATAAATTGTACTGGATTTCTTAAAAAATTGCAGTAAAATTGCCGCAATTATCCCACCGTT  
TATTTTTTGAGTAGTTTCTCATGATGCAGCATACTTCTGTGTGGTACCGACGCTCGGTCAGTCCGTTTGTTCTTGTGGCG  
AGTGTTGCCGTTTTCTTGACCGCGACCGCCAATCTTACCTTTTTTGATAAGGTCAGCCAAACCTATCCCATCGCGGACAA  
TCTCGGCTTTGTGCTGACGATCGCTGTCGTGCTCTTTGGCGCGATGCTACTGATCACCACGCTGTTATCATCGTATCGCT  
ATGTGCTAAAGCCTGTGTTGATTTTGCTATTAATCATGGGCGCGGTGACCAGTTATTTTACTGACACTTATGGCACGGTC  
TATGATACGACCATGCTCCAAAATGCCCTACAGACCGACCAAGCCGAGACCAAGGATCTATTAACGCAGCGTTTATCAT  
GCGTATCATTGGTTTGGGTGTGCTACCAAGTTTGCTTGTGGCTTTTGTTAAGGTGGATTATCCGACTTGGGGCAAGGGTT  
TGATGCGCCGATTGGGCTTGATCGTGGCAAGTCTTGCGCTGATTTTACTGCCTGTGGTGGCGTTCAGCAGTCATTATGCC  
AGTTTCTTTCGCGTGCATAAGCCGCTGCGTAGCTATGTCAATCCGATCATGCCAATCTACTCGGTGGGTAAGCTTGCCAG  
TATTGAGTATAAAAAAGCCAGTGCGCCAAAAGATACCATTTATCACGCCAAAGACGCGGTACAAGCAACCAAGCCTGATA  
TGCGTAAGCCACGCCTAGTGGTGTTTCGTTCGTTCGGTGAGACGGCACGCGCCGATCATGTCAGCTTCAATGGCTATGAGCGC  
GATACTTTCCACAGCTTGCCAAGATCGATGGCGTGACCAATTTTAGCAATGTCACATCGTGCGGCACATCGACGGCGTA  
TTCTGTGCCGTGTATGTTTCACTATCTGGGCGCGGATGAGTATGATGTCGATACCGCCAAATACCAAGAAAATGTGCTGG  
ATACGCTGGATCGCTTGGGCGTAAGTATCTTGTGGCGTGATAATAATTCGGACTCAAAGGCGTGATGGATAAGCTGCCA  
AAAGCGCAATTTGCCGATTATAAATCCGCGACCAACAACGCCATCTGCAACACCAATCCTTATAACGAATGCCGCGATGT  
CGGTATGCTCGTTGGCTTAGATGACTTTGTTCGTGCCAATAACGGCAAAGATATGCTGATCATGCTGCACCAAATGGGCA  
ATCACGGGCCTGCGTATTTTAAGCGATATGATGAAAAGTTTGCCAAATTCACGCCAGTGTGTGAAGGTAATGAGCTTGCC  
AAGTGCGAACATCAGTCCTTGATCAATGCTTATGACAATGCCTTGCTTGCCACCGATGATTCATCGCTCAAAGTATCCA  
GTGGCTGCAGACGCACAGCAATGCCTATGATGTCTCAATGCTGTATGTCAGCGATCATGGCGAAAGTCTGGGTGAGAACG

GTGTCTATCTACATGGTATGCCAAATGCCTTTGCACCAAAAGAACAGCGCAGTGTGCCTGCATTTTTCTGGACGGATAAG  
CAAACCTGGCATCACGCCAATGGCAACCGATACCGTCCTGACCCATGACGCGATCACGCCGACATTATTAAAGCTGTTTGA  
TGTCACCGCGGACAAAGTCAAAGACCGCACCGCATTTCATCCGCTGATTTCTCCCTGTATTTTTTCCAAACCCACCGCACA  
CTCCATTTCGTATTATGGGCGGTGGGGTGGGGTTTGTATGCCGTATTTATCAAATAAACGCCTACT

>NG\_055784.2 Escherichia coli 347-43491A p977565 mcr-1 gene for phosphoethanolamine--lipid A transferase MCR-1.11, complete CDS

CGCATAATTTTTTATATCAGATAAATTGTACTGGATTTCTTAAAAAATTGCAGTATAATTGCCGCAATTATCCCACCGTT  
TATTTTTTGAGTAGTTTCTCATGATGCAGCATACTTCTGTGGTGTGGTACCGACGCTCGGTTCAGTCCGTTTGTTCTTGTG  
GCGAGTGTTGCCGTTTTCTTGACCGCGACCGCCAATCTTACCTTTTTTGATAAAATCAGCCAAACCTATCCCATCGCGGA  
CAATCTCGGCTTTGTGCTGACGATCGCTGTCGTGCTCTTTGGCGCGATGCTACTGATCACCACGCTGTTATCATCGTATC  
GCTATGTGCTAAAGCCTGTGTTGATTTTGCTATTAATCATGGGCGCGGTGACCAGTTATTTTACTGACACTTATGGCACG  
GTCTATGATACGACCATGCTCCAAAATGCCCTACAGACCGACCAAGCCGAGACCAAGGATCTATTAAACGCAGCGTTTAT  
CATGCGTATCATTGGTTTGGGTGTGCTACCAAGTTTGCTTGTGGCTTTTGTTAAGGTGGATTATCCGACTTGGGGCAAGG  
GTTTGATGCGCCGATTGGGCTTGATCGTGGCAAGTCTTGCGCTGATTTTACTGCCTGTGGTGGCGTTCAGCAGTCATTAT  
GCCAGTTTCTTTCGCGTGCATAAGCCGCTGCGTAGCTATGTCAATCCGATCATGCCAATCTACTCGGTGGGTAAGCTTGC  
CAGTATTGAGTATAAAAAAGCCAGTGCGCCAAAAGATACCATTTATCACGCCAAAGACGCGGTACAAGCAACCAAGCCTG  
ATATGCGTAAGCCACGCCTAGTGGTGTTTCGTGCTCGGTGAGACGGCACGCGCCGATCATGTCAGCTTCAATGGCTATGAG  
CGCGATACTTTCCACAGCTTGCCAAGATCGATGGCGTGACCAATTTTAGCAATGTCACATCGTGCGGCACATCGACGGC  
GTATTCTGTGCCGTGTATGTTTCAGCTATCTGGGCGCGGATGAGTATGATGTCGATACCGCCAAATACCAAGAAAATGTGC  
TGGATACGCTGGATCGCTTGGGCGTAAGTATCTTGTGGCGTGATAATAATTCGGACTCAAAAGGCGTGATGGATAAGCTG

CCAAAAGCGCAATTTGCCGATTATAAATCCGCGACCAACAACGCCATCTGCAACACCAATCCTTATAACGAATGCCGCGA  
TGTCGGTATGCTCGTTGGCTTAGATGACTTTGTGCTGCCAATAACGGCAAAGATATGCTGATCATGCTGCACCAAATGG  
GCAATCACGGGCCTGCGTATTTTAAGCGATATGATGAAAAGTTTGCCAAATTCACGCCAGTGTGTGAAGGTAATGAGCTT  
GCCAAGTGCGAACATCAGTCCTTGATCAATGCTTATGACAATGCCTTGCTTGCCACCGATGATTCATCGCTCAAAGTAT  
CCAGTGGCTGCAGACGCACAGCAATGCCTATGATGTCTCAATGCTGTATGTCAGCGATCATGGCGAAAGTCTGGGTGAGA  
ACGGTGTCTATCTACATGGTATGCCAAATGCCTTTGCACCAAAGAAGACAGCGCAGTGTGCCTGCATTTTTCTGGACGGAT  
AAGCAAACCTGGCATCACGCCAATGGCAACCGATACCGTCCTGACCCATGACGCGATCACGCCGACATTATTAAAGCTGTT  
TGATGTCACCGCGGACAAAGTCAAAGACCGCACCGCATTATCCGCTGATTTCTCCCTGTATTTTTTCCAAACCCACCGC  
ACACTCCATTCTGATTATGGGCGGTGGGGTGGGGTTTGTATGCCGTATTTATCAAATAAACGCCTACT

>MF197562.1 Escherichia coli strain MH2-19 phosphoethanolamine transferase (mcr-1) gene, partial cds

GCAGCATACTTCTGTGTGGTACCGACGCTCGGTCAGTCCGTTTGTCTTGTGGCGAGTGTGCCGTTTTCTTGACCGCGA  
CCGCCAATCTTACCTTTTTTGATAAAATCAGCCAAACCTATCCCATCGCGGACAATCTCGGCTTTGTGCTGACGATCGCT  
GTCGTGCTCTTTGGCGCGATGCTACTGATCACCACGCTGTTATCATCGTATCGCTATGTGCTAAAGCCTGTGTTGATTTT  
GCTATTAATCATGGGCGCGGTGACCAGTTATTTTACTGACACTTATGGCACGGTCTATGATACGACCATGCTCCAAAATG  
CCCTACAGACCGACCAAGCCGAGACCAAGGATCTATTAAACGCAGCGTTTATCATGCGTATCATTGGTTTGGGTGTGCTA  
CCAAGTTTGCTTGTGGCTTTTGTAAAGGTGGATTATCCGACTTGGGGCAAGGGTTTGATGCGCCGATTGGGCTTGATCGT  
GGCAAGTCTTGCGCTGATTTTACTGCCTGTGGTGGCGTTCAGCAGTCATTATGCCAGTTTCTTTCGCGTGCATAAGCCGC  
TGCGTAGCTATGTCAATCCGATCATGCCAATCTACTCGGTGGGTAAAGCTTGCCAGTATTGAGTATAAAAAAGCCAGTGCG  
CCAAAAGATAACCATTATACGCCAAAGACGCGGTACAAGCAACCAAGCCTGATATGCGTAAGCCACGCCTAGTGGTGTT

CGTCGTCGGTGAGACGGCACGCGCCGATCATGTCAGCTTCAATGGCTATGAGCGCGATACTTTCCACAGCTTGCCAAGA  
TCGATGGCGTGACCAATTTTAGCAATGTCACATCGTGCGGCACATCGACGGCGTATTCTGTGCCGTGTATGTTTCAGCTAT  
CTGGGCGCGGATGAGTATGATGTCGATACCGCCAAATACCAAGAAAATGTGCTGGATACGCTGGATCGCTTGGGCGTAAG  
TATCTTGTGGCGTGATAATAATTCCGACTCAAAGGCGTGATGGATAAGCTGCCAAAAGCGCAATTTGCCGATTATAAAT  
CCGCGACCAACAACGCCATCTGCAACACCAATCCTTATAACGAATGCCGCGATGTCGGTATGCTCGTTGGCTTAGATGAC  
TTTGTGCTGCCAATAACGGCAAAGATATGCTGATCATGCTGCACCAAATGGGCAATCACGGGCCTGCGTATTTTAAGCG  
ATATGATGAAAAGTTTGCCAAATTCACGCCAGTGTGTGAAGTAATGAGCTTGCCAAGTGCGAACATCAGTCCTTGATCA  
ATGCTTATGACAATGCCTTGCTTGCCACCGATGATTTTCATCGCTCAAAGTATCCAGTGGCTGCAGACGCACAGCAATGCC  
TATGATGTCTCAATGCTGTATGTCAGCGATCATGGCGAAAGTCTGGGTGAGAACGGTGTCTATCTACATGGTATGCCAAA  
TGCCTTTGCACCAAAAGAACAGCGCAGTGTGCCTGCATTTTTCTGGACGGATAAGCAAACCTGGCATCACGCCAATGGCAA  
CCGATACCGTCCTGACCCATGACGCGATCACGCCGACATTATTAAAGCTGTTTGATGTCACCGCGGACAAAGTCAAAGAC  
CGCAC

>NG\_067236.1 Escherichia coli SAUVM\_E3 mcr-1 gene for phosphoethanolamine--lipid A transferase MCR-1.24, complete CDS

ATGATGCAGCATACTTCTGTGTGGTACCGACGCTCGGTCAGTCCGTTTGTTCCTTGTGGCGAGTGTTGCCGTTTTCTTGAC  
CGCGACCGCCAATCTTACCTTTTTTGATAAAATCAGCCAAACCTATCCCATCGCGGACAATCTCGGCTTTGTGCTGACGA  
TCGCTGTCGTGCTCTTTGGCGCGATGCTACTGATCACCACGCTGTTATCATCGTATCGCTATGTGCTAAAGCCTGTGTTG  
ATTTTGCTATTAATCATGGGCGCGGTGACCAGTTATTTTACTGACACTTATGGCACGGTCTATGATACGACCATGCTCCA  
AAATGCCCTACAGACCGACCAAGCCGAGACCAAGGATCTATTAAACGCAGCGTTTATCATGCGTATCATTGGTTTGGGTG  
TGCTACCAAGTTTGCTTGTGGCTTTTGTTAAGGTGGATTATCCGACTTGGGGCAAGGGTTTGATGCGCCGATTGGGCTTG

ATCGTGGCAAGTCTTGCGCCGATTTTACTGCCTGTGGTGGCGTTCAGCAGTCAGTATTCCAGTTTCTTTCGCGTGCATAA  
GCCGCCATGTAGCTATGTCAATCCGATCATGCCAATCTACTCGGTGGGTAAGCTGGCCAGTACTGAGTATAAAAAAGCCA  
GTGCGCCAAAAGATTCCATTTATCACGCCAAAGACGCGGTACAAGCAACCAAGCCTGATATGTGTAAGCCACGCGTAGTG  
GTGTTTCGTCGTCGGTGAGACGGCACGCGCCGATCACGTCAGCTTCAATGGCTATGAGCGCGATACTTTCCCACAGCTTGC  
CAAGATCGATGGCGTGACCAATTTTAGCAATGTCACATCGTGCGGCACATCGACGGCGTATTTTGTGCCGTGTATGTTCA  
GCTATCTGGGCGCGGATGAGTATGATGTCGATACCGCCAAATACCAAGAAAATGTGCTGGATACGCTGGATCGCTTGGGC  
GTAAGTATCTTGTGGCGTGATAATAATTCGGACTCAAAAGGCGTGATGGATAAGCTGCCAAAAGCGCAATTTGCCGATTA  
TAAATCCGCGACCAACAACGCCATCTGCAACACCAATCCTTATAACGAATGCCGCGATGTCGGTATGCTCGTTGGCTTAG  
ATGACTTTGTGCTGCCAATAACGGCAAAGATATGCTGATCATGCTGCACCAAATGGGCAATCACGGGCCTGCGTATTTT  
AAGCGATATGATGAAAAGTTTGCCAAATTCACGCCAGTGTGTGAAGGTAATGAGCTTGCCAAGTGCGAACATCAGTCCTT  
GATCAATGCTTATGACAATGCCTTGCTTGCCACCGATGATTTTCATCGCTCAAAGTATCCAGTGGCTGCAGACGCACAGCA  
ATGCCTATGATGTCTCAATGCTGTATGTCAGCGATCATGGCGAAAGTCTGGGTGAGAACGGTGTCTATCTACATGGTATG  
CCAAATGCCTTTGCACCAAAAGAACAGCGCAGTGTGCCTGCATTTTTTCTGGACGGATAAGCAAACCTGGCATCACGCCAAT  
GGCAACCGATACCGTCCTGACCCATGACGCGATCACGCCGACATTATTAAAGCTGTTTGATGTCACCGCGGACAAAGTCA  
AAGACCGCACCGCATTTCATCCGCTGA

>MN879257.1 Escherichia coli strain SAUVM\_E3 phosphoethanolamine--lipid A transferase MCR-1.24 (mcr-1) gene, mcr-1.24 allele, partial cds

ATGATGCAGCATACTTCTGTGTGGTACCGACGCTCGGTTCAGTCCGTTTGTTCCTTGTGGCGAGTGTTGCCGTTTTCTTGAC  
CGCGACCGCCAATCTTACCTTTTTTGATAAAATCAGCCAAACCTATCCCATCGCGGACAATCTCGGCTTTGTGCTGACGA  
TCGCTGTCGTGCTCTTTGGCGCGATGCTACTGATCACCACGCTGTTATCATCGTATCGCTATGTGCTAAAGCCTGTGTTG



ATTTTGCTATTAATCATGGGCGCGGTGACCAGTTATTTTACTGACACTTATGGCACGGTCTATGATACGACCATGCTCCA  
AAATGCCCTACAGACCGACCAAGCCGAGACCAAGGATCTATTAAACGCAGCGTTTATCATGCGTATCATTGGTTTGGGTG  
TGCTACCAAGTTTGCTTGTGGCTTTTGTTAAGGTGGATTATCCGACTTGGGGCAAGGGTTTGATGCGCCGATTGGGCTTG  
ATCGTGGCAAGTCTTGCGCCGATTTTACTGCCTGTGGTGGCGTTCAGCAGTCAGTATTCCAGTTTCTTTCGCGTGCATAA  
GCCGCCATGTAGCTATGTCAATCCGATCATGCCAATCTACTCGGTGGGTAAAGCTGGCCAGTACTGAGTATAAAAAAGCCA  
GTGCGCCAAAAGATTCCATTTATCACGCCAAAGACGCGGTACAAGCAACCAAGCCTGATATGTGTAAGCCACGCGTAGTG  
GTGTTTCGTCGTCGGTGAGACGGCACGCGCCGATCACGTCAGCTTCAATGGCTATGAGCGCGATACTTTCCACAGCTTGC  
CAAGATCGATGGCGTGACCAATTTTAGCAATGTCACATCGTGCGGCACATCGACGGCGTATTTTGTGCCGTGTATGTTCA  
GCTATCTGGGCGCGGATGAGTATGATGTGATACCGCCAAATACCAAGAAAATGTGCTGGATACGCTGGATCGCTTGGGC  
GTAAGTATCTTGTGGCGTGATAATAATTCGGA CTCAAAGGCGTGATGGATAAGCTGCCAAAAGCGCAATTTGCCGATTA  
TAAATCCGCGACCAACAACGCCATCTGCAACACCAATCCTTATAACGAATGCCGCGATGTCGGTATGCTCGTTGGCTTAG  
ATGACTTTGTCGCTGCCAATAACGGCAAAGATATGCTGATCATGCTGCACCAAATGGGCAATCACGGGCCTGCGTATTTT  
AAGCGATATGATGAAAAGTTTGCCAAATTCACGCCAGTGTGTGAAGGTAATGAGCTTGCCAAGTGCGAACATCAGTCCTT  
GATCAATGCTTATGACAATGCCTTGCTTGCCACCGATGATTTTCATCGCTCAAAGTATCCAGTGGCTGCAGACGCACAGCA  
ATGCCTATGATGTCTCAATGCTGTATGTCAGCGATCATGGCGAAAGTCTGGGTGAGAACGGTGTCTATCTACATGGTATG  
CCAAATGCCTTTGCACCAAAAGAACAGCGCAGTGTGCCTGCATTTTTCTGGACGGATAAGCAAACCTGGCATCACGCCAAT  
GGCAACCGATACCGTCCTGACCCATGACGCGATCACGCCGACATTATTAAAGCTGTTTGATGTCACCGCGGACAAAGTCA  
AAGACCGCACCGCATTTCATCCGCTGA

>MH447366.1 Escherichia coli strain F9 phosphoethanolamine transferase MCR1 (mcr1) gene, partial cds

TCGTTTGTTCCTTGTGGCGAGTGTTGCCGTTTTCTTGACCGCGACCGCCAATCTTACCTTTTTTGATAAAATCAGCCAAAC  
CTATCCCATCGCGGACAATCTCGGCTTTGTGCTGACGATCGCTGTCGTGCTCTTTGGCGCGATGCTACTGATCACCACGC  
TGTTATCATCGTATCGCTATGTGCTAAAGCCTGTGTTGATTTTGCTATTAATCATGGGCGCGGTGACCAGTTATTTTACT  
GACACTTATGGCACGGTCTATGATACGACCATGCTCCAAAATGCCCTACAGACCGACCAAGCCGAGACCAAGGATCTATT  
AAACGCAGCGTTTATCATGCGTATCATTGGTTTGGGTGTGCTACCAAGTTTGCTTGTGGCTTTTGTTAAGGTGGATTATC  
CGACTTGGGGCAAGGGTTTGATGCGCCGATTGGGCTTGATCGTGGCAAGTCTTGCGCTGATTTTACTGCCTGTGGTGGCG  
TTCAGCAGTCATTATGCCAGTTTCTTTCGCGTGCATAAGCCGCTGCGTAGCTATGTCAATCCGATCATGCCAATCTACTC  
GGTGGGTAAGCTTGCCAGTATTGAGTATAAAAAAGCCAGTGCGCCAAAAGATACCATTTATCACGCCAAAGACGCGGTAC  
AAGCAACCAAGCCTGATATGCGTAAGCCACGCCTAGTGGTGTTTCGTCGTCGGTGAGACGGCACGCGCCGATCATGTCAGC  
TTCAATGGCTATGAGCGCGATACTTTCCACAGCTTGCCAAGATCGATGGCGTGACCAATTTTAGCAATGTCACATCGTG  
CGGCACATCGACGGCGTATTCTGTGCCGTGTATGTTTCACTATCTGGGCGCGGATGAGTATGATGTCGATACCGCCAAAT  
ACCAAGAAAATGTGCTGGATACGCTGGATCGCTTGGGCGTAAGTATCTTGTGGCGTGATAATAATTCGGACTCAAAGGC  
GTGATGGATAAGCTGCCAAAAGCGCAATTTGCCGATTATAAATCCGCGACCAACAACGCCATCTGCAACACCAATCCTTA  
TAACGAATGCCGCGATGTCGGTATGCTCGTTGGCTTAGATGACTTTGTCGCTGCCAATAACGGCAAAGATATGCTGATCA  
TGCTGCACCAAATGGGCAATCACGGGCCTGCGTATTTTAAGCGATATGATGAAAAGTTTGCCAAATTCACGCCAGTGTGT  
GAAGGTAATGAGCTTGCCAAGTGCGAACATCAGTCCTTGATCAATGCTTATGACAATGCCTTGCTTGCCACCGATGATTT  
CATCGCTCAAAGTATCCAGTGGCTGCAGACGCACAGCAATGCCTATGATGTCTCAATGCTGTATGTCAGCGATCATGGCG  
AAAGTCTGGGTGAGAACGGTGTCTATCTACATGGTATGCCAAATGCCTTTGCACCAAAGAAGACAGCGCAGTGTGCCTGCA  
TTTTTCTGGACGGATAAGCAAACCTGGCATCACGCCAATGGCAACCGATACCGTCCTGACCCATGACGCGATCACGCCGAC

ATTATTAAAGCTGTTGA

>MH447367.1 Escherichia coli strain F33 phosphoethanolamine transferase MCR1 (mcr1) gene, partial cds

TCGTTTGTTCCTTGTGGCGAGTGTGCGGTTTTCTTGACCGCGACCGCCAATCTTACCTTTTTTGATAAAATCAGCCAAAC  
CTATCCCATCGCGGACAATCTCGGCTTTGTGCTGACGATCGCTGTCGTGCTCTTTGGCGCGATGCTACTGATCACCACGC  
TGTTATCATCGTATCGCTATGTGCTAAAGCCTGTGTTGATTTTGCTATTAATCATGGGCGCGGTGACCAGTTATTTTACT  
GACACTTATGGCACGGTCTATGATACGACCATGCTCCAAAATGCCCTACAGACCGACCAAGCCGAGACCAAGGATCTATT  
AAACGCAGCGTTTATCATGCGTATCATTGGTTTGGGTGTGCTACCAAGTTTGCTTGTGGCTTTTGTTAAGGTGGATTATC  
CGACTTGGGGCAAGGGTTTGATGCGCCGATTGGGCTTGATCGTGGCAAGTCTTGCGCTGATTTTACTGCCTGTGGTGGCG  
TTCAGCAGTCATTATGCCAGTTTCTTTCGCGTGCATAAGCCGCTGCGTAGCTATGTCAATCCGATCATGCCAATCTACTC  
GGTGGGTAAGCTTGCCAGTATTGAGTATAAAAAAGCCAGTGCGCCAAAAGATACCATTTATCACGCCAAAGACGCGGTAC  
AAGCAACCAAGCCTGATATGCGTAAGCCACGCCTAGTGGTGTTCGTCGTCGGTGAGACGGCACGCGCCGATCATGTCAGC  
TTCAATGGCTATGAGCGCGATACTTTCCACAGCTTGCCAAGATCGATGGCGTGACCAATTTTAGCAATGTCACATCGTG  
CGGCACATCGACGGCGTATTCTGTGCCGTGTATGTTTCAGCTATCTGGGCGCGGATGAGTATGATGTCGATACCGCCAAAT  
ACCAAGAAAATGTGCTGGATACGCTGGATCGCTTGGGCGTAAGTATCTTGTGGCGTGATAATAATTCGGACTCAAAGGC  
GTGATGGATAAGCTGCCAAAAGCGCAATTTGCCGATTATAAATCCGCGACCAACAACGCCATCTGCAACACCAATCCTTA  
TAACGAATGCCGCGATGTCGGTATGCTCGTTGGCTTAGATGACTTTGTGCTGCCAATAACGGCAAAGATATGCTGATCA  
TGCTGCACCAAATGGGCAATCACGGGCCTGCGTATTTTAAGCGATATGATGAAAAGTTTGCCAAATTCACGCCAGTGTGT  
GAAGGTAATGAGCTTGCCAAGTGCGAACATCAGTCCTTGATCAATGCTTATGACAATGCCTTGCTTGCCACCGATGATTT  
CATCGCTCAAAGTATCCAGTGGCTGCAGACGCACAGCAATGCCTATGATGTCTCAATGCTGTATGTCAGCGATCATGGCG

AAAGTCTGGGTGAGAACGGTGTCTATCTACATGGTATGCCAAATGCCTTTGCACCAAAGAAGACAGCGCAGTGTGCCTGCA  
TTTTTCTGGACGGATAAGCAAACCTGGCATCACGCCAATGGCAACCGATACCGTCCTGACCCATGACGCGATCACGCCGAC  
A

>KY218739.1 Escherichia coli strain W5-6 phosphoethanolamine--lipid A transferase MCR-1 (mcr-1) gene, partial cds

TTTGTTCCTGTGGCGAGTGTTGCCGTTTTCTTGACCGCGACCGCCAATCTTACCTTTTTTGATAAAATCAGCCAAACCTA  
TCCCATCGCGGACAATCTCGGCTTTGTGCTGACGATCGCTGTCGTGCTCTTTGGCGCGATGCTACTGATCACCACGCTGT  
TATCATCGTATCGCTATGTGCTAAAGCCTGTGTTGATTTTGCTATTAATCATGGGCGCGGTGACCAGTTATTTTACTGAC  
ACTTATGGCACGGTCTATGATACGACCATGCTCCAAAATGCCCTACAGACCGACCAAGCCGAGACCAAGGATCTATTA  
CGCAGCGTTTATCATGCGTATCATTGGTTTGGGTGTGCTACCAAGTTTGCTTGTGGCTTTTGTTAAGGTGGATTATCCGA  
CTTGGGGCAAGGGTTTGATGCGCCGATTGGGCTTGATCGTGGCAAGTCTTGCGCTGATTTTACTGCCTGTGGTGGCGTTC  
AGCAGTCATTATGCCAGTTTCTTTCGCGTGCATAAGCCGCTGCGTAGCTATGTCAATCCGATCATGCCAATCTACTCGGT  
GGGTAAGCTTGCCAGTATTGAGTATAAAAAAGCCAGTGCGCCAAAAGATACCATTTATCACGCCAAAGACGCGGTACAAG  
CAACCAAGCCTGATATGCGTAAGCCACGCCTAGTGGTGTTCGTCGTCGGTGAGACGGCACGCGCCGATCATGTCAGCTTC  
AATGGCTATGAGCGCGATACTTTCCACAGCTTGCCAAGATCGATGGCGTGACCAATTTTAGCAATGTCACATCGTGCGG  
CACATCGACGGCGTATTCTGTGCCGTGTATGTTTCAGCTATCTGGGCGCGGATGAGTATGATGTCGATACCGCCAAATACC  
AAGAAAATGTGCTGGATACGCTGGATCGCTTGGGCGTAAGTATCTTGTGGCGTGATAATAATTCGGACTCAAAGGCGTG  
ATGGATAAGCTGCCAAAAGCGCAATTTGCCGATTATAAATCCGCGACCAACAACGCCATCTGCAACACCAATCCTTATAA  
CGAATGCCGCGATGTCGGTATGCTCGTTGGCTTAGATGACTTTGTGCTGCCAATAACGGCAAAGATATGCTGATCATGC  
TGCACCAAATGGGCAATCACGGGCCTGCGTATTTTAAGCGATATGATGAAAAGTTTGCCAAATTCACGCCAGTGTGTGAA

GGTAATGAGCTTGCCAAGTGCGAACATCAGTCCTTGATCAATGCTTATGACAATGCCTTGCTTGCCACCGATGATTTTCAT  
CGCTCAAAGTATCCAGTGGCTGCAGACGCACAGCAATGCCTATGATGTCTCAATGCTGTATGTCAGCGATCATGGCGAAA  
GTCTGGGTGAGAACGGTGTCTATCTACATGGTATGCCAAATGCCTTTGCACCAAAGAAGACAGCGCAGTGTGCCTGCATTT  
TTCTGGACGGATAAGCAAACCTGGCATCACGCCAATGGCAACCGATACCGTCCTGACCCATGACGCGATCACGCCGACA  
>KY218738.1 Escherichia coli strain W2-5 phosphoethanolamine--lipid A transferase MCR-1 (mcr-1) gene, partial cds  
TTTGTTCCTTGTTGGCGAGTGTTGCCGTTTTCTTGACCGCGACCGCCAATCTTACCTTTTTTGATAAAATCAGCCAAACCTA  
TCCCATCGCGGACAATCTCGGCTTTGTGCTGACGATCGCTGTCGTGCTCTTTGGCGCGATGCTACTGATCACCACGCTGT  
TATCATCGTATCGCTATGTGCTAAAGCCTGTGTTGATTTTGCTATTAATCATGGGCGCGGTGACCAGTTATTTTACTGAC  
ACTTATGGCACGGTCTATGATACGACCATGCTCCAAAATGCCCTACAGACCGACCAAGCCGAGACCAAGGATCTATTA  
CGCAGCGTTTATCATGCGTATCATTGGTTTGGGTGTGCTACCAAGTTTGCTTGTGGCTTTTGTTAAGGTGGATTATCCGA  
CTTGGGGCAAGGGTTTGATGCGCCGATTGGGCTTGATCGTGGCAAGTCTTGCGCTGATTTTACTGCCTGTGGTGGCGTTC  
AGCAGTCATTATGCCAGTTTCTTTCGCGTGCATAAGCCGCTGCGTAGCTATGTCAATCCGATCATGCCAATCTACTCGGT  
GGGTAAGCTTGCCAGTATTGAGTATAAAAAAGCCAGTGCGCCAAAAGATACCATTTATCACGCCAAAGACGCGGTACAAG  
CAACCAAGCCTGATATGCGTAAGCCACGCCTAGTGGTGTTCGTCGTCGGTGAGACGGCACGCGCCGATCATGTCAGCTTC  
AATGGCTATGAGCGCGATACTTTCCACAGCTTGCCAAGATCGATGGCGTGACCAATTTTAGCAATGTCACATCGTGCGG  
CACATCGACGGCGTATTCTGTGCCGTGTATGTTTCAGCTATCTGGGCGCGGATGAGTATGATGTCGATACCGCCAAATACC  
AAGAAAATGTGCTGGATACGCTGGATCGCTTGGGCGTAAGTATCTTGTGGCGTGATAATAATTCGGACTCAAAGGCGTG  
ATGGATAAGCTGCCAAAAGCGCAATTTGCCGATTATAAATCCGCGACCAACAACGCCATCTGCAACACCAATCCTTATAA  
CGAATGCCGCGATGTCGGTATGCTCGTTGGCTTAGATGACTTTGTGCTGCCAATAACGGCAAAGATATGCTGATCATGC

TGCACCAAATGGGCAATCACGGGCTGCGTATTTTAAGCGATATGATGAAAAGTTTGCCAAATTCACGCCAGTGTGTGAA  
GGTAATGAGCTTGCCAAGTGCGAACATCAGTCCTTGATCAATGCTTATGACAATGCCTTGCTTGCCACCGATGATTTTCAT  
CGCTCAAAGTATCCAGTGGCTGCAGACGCACAGCAATGCCTATGATGTCTCAATGCTGTATGTCAGCGATCATGGCGAAA  
GTCTGGGTGAGAACGGTGTCTATCTACATGGTATGCCAAATGCCTTTGCACCAAAGAAGACAGCGCAGTGTGCCTGCATTT  
TTCTGGACGGATAAGCAAACCTGGCATCACGCCAATGGCAACCGATACCGTCCTGACCCATGACGCGATCACGCCGACA  
>KY218737.1 Escherichia coli strain BE2-5 phosphoethanolamine--lipid A transferase MCR-1 (mcr-1) gene, partial cds  
TTTGTTCCTGTGGCGAGTGTTGCCGTTTTCTTGACCGCGACCGCCAATCTTACCTTTTTTGATAAAATCAGCCAAACCTA  
TCCCATCGCGGACAATCTCGGCTTTGTGCTGACGATCGCTGTCGTGCTCTTTGGCGCGATGCTACTGATCACCACGCTGT  
TATCATCGTATCGCTATGTGCTAAAGCCTGTGTTGATTTTGCTATTAATCATGGGCGCGGTGACCAGTTATTTTACTGAC  
ACTTATGGCACGGTCTATGATACGACCATGCTCCAAAATGCCCTACAGACCGACCAAGCCGAGACCAAGGATCTATTTAAA  
CGCAGCGTTTATCATGCGTATCATTGGTTTGGGTGTGCTACCAAGTTTGCTTGTGGCTTTTGTTAAGGTGGATTATCCGA  
CTTGGGGCAAGGGTTTGATGCGCCGATTGGGCTTGATCGTGGCAAGTCTTGCGCTGATTTTACTGCCTGTGGTGGCGTTC  
AGCAGTCATTATGCCAGTTTCTTTTCGCGTGCATAAGCCGCTGCGTAGCTATGTCAATCCGATCATGCCAATCTACTCGGT  
GGGTAAGCTTGCCAGTATTGAGTATAAAAAAGCCAGTGCGCCAAAAGATACCATTTATCACGCCAAAGACGCGGTACAAG  
CAACCAAGCCTGATATGCGTAAGCCACGCCTAGTGGTGTTCGTCGTCGGTGAGACGGCACGCGCCGATCATGTCAGCTTC  
AATGGCTATGAGCGCGATACTTTCCACAGCTTGCCAAGATCGATGGCGTGACCAATTTTAGCAATGTCACATCGTGCGG  
CACATCGACGGCGTATTCTGTGCCGTGTATGTTTCAGCTATCTGGGCGCGGATGAGTATGATGTCGATACCGCCAAATACC  
AAGAAAATGTGCTGGATACGCTGGATCGCTTGGGCGTAAGTATCTTGTGGCGTGATAATAATTCGGACTCAAAGGCGTG  
ATGGATAAGCTGCCAAAAGCGCAATTTGCCGATTATAAATCCGCGACCAACAACGCCATCTGCAACACCAATCCTTATAA

CGAATGCCGCGATGTCGGTATGCTCGTTGGCTTAGATGACTTTGTCGCTGCCAATAACGGCAAAGATATGCTGATCATGC  
TGCACCAAATGGGCAATCACGGGCTGCGTATTTTAAGCGATATGATGAAAAGTTTGCCAAATTCACGCCAGTGTGTGAA  
GGTAATGAGCTTGCCAAGTGCGAACATCAGTCCTTGATCAATGCTTATGACAATGCCTTGCTTGCCACCGATGATTTTCAT  
CGCTCAAAGTATCCAGTGGCTGCAGACGCACAGCAATGCCTATGATGTCTCAATGCTGTATGTCAGCGATCATGGCGAAA  
GTCTGGGTGAGAACGGTGTCTATCTACATGGTATGCCAAATGCCTTTGCACCAAAGAAGACAGCGCAGTGTGCCTGCATTT  
TTCTGGACGGATAAGCAAACCTGGCATCACGCCAATGGCAACCGATACCGTCCTGACCCATGACGCGATCACGCCGACA

>MK030127.2 Escherichia coli strain SS30 MCR family phosphoethanolamine--lipid A transferase (mcr) gene, partial cds

TCTTGTGGCGAGTGTGCGGTTTTCTTGACCGCGACCGCCAATCTTACCTTTTTTGATAAAATCAGCCAAACCTATCCCA  
TCGCGGACAATCTCGGCTTTGTGCTGACGATCGCTGTCGTGCTCTTTGGCGCGATGCTACTGATCACCACGCTGTTATCA  
TCGTATCGCTATGTGCTAAAGCCTGTGTTGATTTTGCTATTAATCATGGGCGCGGTGACCAGTTATTTTACTGACACTTA  
TGGCACGGTCTATGATACGACCATGCTCCAAAATGCCCTACAGACCGACCAAGCCGAGACCAAGGATCTATTAACGCAG  
CGTTTATCATGCGTATCATTGGTTTGGGTGTGCTACCAAGTTTGCTTGTGGCTTTTGTTAAGGTGGATTATCCGACTTGG  
GGCAAGGGTTTGATGCGCCGATTGGGCTTGATCGTGGCAAGTCTTGCGCTGATTTTACTGCCTGTGGTGGCGTTCAGCAG  
TCATTATGCCAGTTTCTTTCGCGTGCATAAGCCGCTGCGTAGCTATGTCAATCCGATCATGCCAATCTACTCGGTGGGTA  
AGCTTGCCAGTATTGAGTATAAAAAAGCCAGTGCGCCAAAAGATACCATTTATCACGCCAAAGACGCGGTACAAGCAACC  
AAGCCTGATATGCGTAAGCCACGCCTAGTGGTGTTCGTGTCGGTGAGACGGCACGCGCCGATCATGTCAGCTTCAATGG  
CTATGAGCGCGATACTTTCCACAGCTTGCCAAGATCGATGGCGTGACCAATTTTAGCAATGTCACATCGTGCGGCACAT  
CGACGGCGTATTCTGTGCCGTGTATGTTTCAAGCTATCTGGGCGCGGATGAGTATGATGTCGATACCGCCAAATACCAAGAA  
AATGTGCTGGATACGCTGGATCGCTTGGGCGTAAGTATCTTGTGGCGTGATAATAATTCCGACTCAAAGGCGTGATGGA

TAAGCTGCCAAAAGCGCAATTTGCCGATTATAAATCCGCGACCAACAACGCCATCTGCAACACCAATCCTTATAACGAAT  
GCCGCGATGTCGGTATGCTCGTTGGCTTAGATGACTTTGTCGCTGCCAATAACGGCAAAGATATGCTGATCATGCTGCAC  
CAAATGGGCAATCACGGGCCTGCGTATTTTAAGCGATATGATGAAAAGTTTGCCAAATTCACGCCAGTGTGTGAAGGTAA  
TGAGCTTGCCAAGTGCGAACATCAGTCCTTGATCAATGCTTATGACAATGCCTTGCTTGCCACCGATGATTTTCATCGCTC  
AAAGTATCCAGTGGCTGCAGACGCACAGCAATGCCTATGATGTCTCAATGCTGTATGTCAGCGATCATGGCGAAAGTCTG  
GGTGAGAACGGTGTCTATCTACATGGTATGCCAAATGCCTTTGCACCAAAGAAGACAGCGCAGTGTGCCTGCATTTTTCTG  
GACGGATAAGCAAACCTGGCATCACGCCAATGGCAACCGATACCGTCCTGACCCATGACGCGATCACGCCGACATTAT  
>MK030126.2 Escherichia coli strain SS20 MCR family phosphoethanolamine--lipid A transferase (mcr) gene, partial cds  
GACCGTTCCTGATAGTCGTTGTTCTTGTGGCGAGTGTTGCCGTTTTCTTGACCGCGACCGCCAATCTTACCTTTTTTGAT  
AAAATCAGCCAAACCTATCCCATCGCGGACAATCTCGGCTTTGTGCTGACGATCGCTGTCGTGCTCTTTGGCGCGATGCT  
ACTGATCACCACGCTGTTATCATCGTATCGCTATGTGCTAAAGCCTGTGTTGATTTTGCTATTAATCATGGGCGCGGTGA  
CCAGTTATTTTACTGACACTTATGGCACGGTCTATGATACGACCATGCTCCAAAATGCCCTACAGACCGACCAAGCCGAG  
ACCAAGGATCTATTAACGCAGCGTTTAACAGGCGTATCACTGGTTTGGGTGTGCTACCAAGTTTGCTTGTGGCTTTTGT  
TAAGGTGGATTATCCGACTTGGGGCAAGGGTTTGATGCGCCGATTGGGCTTGATCGTGGCAAGTCTTGCGCTGATTTTAC  
TGCCTGTGGTGGCGTTCAGCAGTCATTATGCCAGTTTCTTTGCGGTGCATAAGCCGCTGCGTAGCTATGTCAATCCGATC  
ATGCCAATCTACTCGGTGGGTAAGCTTGCCAGTATTGAGTATAAAAAAGCCAGTGCGCCAAAAGATACCATTTATCACGC  
CAAAGACGCGGTACAAGCAACCAAGCCTGATATGCGTAAGCCACGCCTAGTGGTGTTCGTGTCGGTGAGACGGCACGCG  
CCGATCATGTCAGCTTCAATGGCTATGAGCGCGATACTTTCCACAGCTTGCCAAGATCGATGGCGTGACCAATTTTAGC  
AATGTCACATCGTGCGGCACATCGACGGCGTATTCTGTGCCGTGTATGTTCACTATCTGGGCGCGGATGAGTATGATGT



CGATACCGCCAAATACCAAGAAAATGTGCTGGATACGCTGGATCGCTTGGGCGTAAGTATCTTGTGGCGTGATAATAATT  
CGGACTCAAAAGGCGTGATGGATAAGCTGCCAAAAGCGCAATTTGCCGATTATAAATCCGCGACCAACAACGCCATCTGC  
AACACCAATCCTTATAACGAATGCCGCGATGTCGGTATGCTCGTTGGCTTAGATGACTTTGTGCTGCCAATAACGGCAA  
AGATATGCTGATCATGCTGCACCAAATGGGCAATCACGGGCCTGCGTTTTTTAAGCGATATGATGAAAAGTTTGCCAAAT  
TCACGCCAGTGTGTGAAGGTAATGAGCTTGCCAAGTGCGAACATCAGTCCTTGATCAATGCTTATGACAATGCCTTGCTT  
GCCACCGATGATTTTCATCGCTCAAAGTATCCAGTGGCTGCAGACGCACAGCAATGCCTATGATGTCTCAATGCTGTATGT  
CAGCGATCATGGCGAAAGTCTGGGTGAGAACGGTGTCTATCTACATGGTATGCCAAATGCCTTTGCACCAAAGAAGACAGC  
GCAGTGTGCCTGCATTTTTCTGGACGGATAAGCAAACCTGGCATCACGCCAATGGCAACCGATACCGTCCTGACCCATGAC  
GCGATCACGCCGACATTA

>KY013597.1 Escherichia coli strain C2-007R phosphoethanolamine--lipid A transferase (mcr-1) gene, partial cds

CGGTCAGTCCGTTTGTCTTGTGGCGAGTGTTGCCGTTTTCTTGACCGCGACCGCCAATCTTACCTTTTTTGATAAAATC  
AGCCAAACCTATCCCATCGCGGACAATCTCGGCTTTGTGCTGACGATCGCTGTCGTGCTCTTTGGCGCGATGCTACTGAT  
CACCACGCTGTTATCATCGTATCGCTATGTGCTAAAGCCTGTGTTGATTTTGCTATTAATCATGGGCGCGGTGACCAGTT  
ATTTTACTGACACTTATGGCACGGTCTATGATACGACCATGCTCCAAAATGCCCTACAGACCGACCAAGCCGAGACCAAG  
GATCTATTAAACGCAGCGTTTATCATGCGTATCATTGGTTTGGGTGTGCTACCAAGTTTGCTTGTGGCTTTTGTTAAGGT  
GGATTATCCGACTTGGGGCAAGGGTTTGATGCGCCGATTGGGCTTGATCGTGGCAAGTCTTGCGCTGATTTTACTGCCTG  
TGGTGGCGTTTCAGCAGTCATTATGCCAGTTTCTTTCGCGTGCATAAGCCGCTGCGTAGCTATGTCAATCCGATCATGCCA  
ATCTACTCGGTGGGTAAGCTTGCCAGTATTGAGTATAAAAAAGCCAGTGCGCCAAAAGATACCATTTATCACGCCAAAGA  
CGCGGTACAAGCAACCAAGCCTGATATGCGTAAGCCACGCCTAGTGGTGTTTCGTGCTCGGTGAGACGGCACGCGCCGATC

ATGTCAGCTTCAATGGCTATGAGCGCGATACTTTCCACAGCTTGCCAAGATCGATGGCGTGACCAATTTTAGCAATGTC  
ACATCGTGCGGCACATCGACGGCGTATTCTGTGCCGTGTATGTTTCAGCTATCTGGGCGCGGATGAGTATGATGTCGATAC  
CGCCAAATACCAAGAAAATGTGCTGGATACGCTGGATCGCTTGGGCGTAAGTATCTTGTGGCGTGATAATAATTCGGACT  
CAAAAGGCGTGATGGATAAGCTGCCAAAAGCGCAATTTGCCGATTATAAATCCGCGACCAACAACGCCATCTGCAACACC  
AATCCTTATAACGAATGCCGCGATGTCGGTATGCTCGTTGGCTTAGATGACTTTGTGCTGCCAATAACGGCAAAGATAT  
GCTGATCATGCTGCACCAAATGGGCAATCACGGGCCTGCGTATTTTAAGCGATATGATGAAAAGTTTGCCAAATTCACGC  
CAGTGTGTGAAGGTAATGAGCTTGCCAAGTGCGAACATCAGTCCTTGATCAATGCTTATGACAATGCCTTGCTTGCCACC  
GATGATTTTCATCGCTCAAAGTATCCAGTGGCTGCAGACGCACAGCAATGCCTATGATGTCTCAATGCTGTATGTCAGCGA  
TCATGGCGAAAGTCTGGGTGAGAACGGTGTCTATCTACATGGTATGCCAAATGCCTTTGCACCAAAGAAGACAGCGCAGTG  
TGCCTGCATTTTTCTGGACGGATAAGCAAACCTGGCATCACGCCAATGGCAACCGATACCGTCCTGACC

>MN148432.1 Escherichia coli strain RShimy4 MCR-1 family phosphoethanolamine--lipid A transferase (mcr-1) gene, partial cds

ATGCTACTGATCACCACGCTGTTATCATCGTATCGCTATGTGCTAAAGCCTGTGTTGATTTTGCTATTAATCATGGGCGC  
GGTGACCAGTTATTTTACTGACACTTATGGCACGGTCTATGATACGACCATGCTCCAAAATGCCCTACAGACCGACCAAG  
CCGAGACCAAGGATCTATTAAACGCAGCGTTTATCATGCGTATCATTGGTTTGGGTGTGCTACCAAGTTTGCTTGTGGCT  
TTTGTTAAGGTGGATTATCCGACTTGGGGCAAGGGTTTGATGCGCCGATTGGGCTTGATCGTGGCAAGTCTTGCGCTGAT  
TTTACTGCCTGTGGTGGCGTTCAGCAGTCATTATGCCAGTTTCTTTTCGCGTGCATAAGCCGCTGCGTAGCTATGTCAATC  
CGATCATGCCAATCTACTCGGTGGGTAAAGCTTGCCAGTATTGAGTATAAAAAAGCCAGTGCGCCAAAAGATACCATTTAT  
CACGCCAAAGACGCGGTACAAGCAACCAAGCCTGATATGCGTAAGCCACGCCTAGTGGTGTTCGTCGTCGGTGAGACGGC  
ACGCGCCGATCATGTCAGCTTCAATGGCTATGAGCGCGATACTTTCCACAGCTTGCCAAGATCGATGGCGTGACCAATT

TTAGCAATGTCACATCGTGCGGCACATCGACGGCGTATTCTGTGCCGTGTATGTTTCAGCTATCTGGGCGCGGATGAGTAT  
GATGTCGATACCGCCAAATACCAAGAAAATGTGCTGGATACGCTGGATCGCTTGGGCGTAAGTATCTTGTGGCGTGATAA  
TAATTCGGACTCAAAAGGCGTGATGGATAAGCTGCCAAAAGCGCAATTTGCCGATTATAAATCCGCGACCAACAACGCCA  
TCTGCAACACCAATCCTTATAACGAATGCCGCGATGTCGGTATGCTCGTTGGCTTAGATGACTTTGTCGCTGCCAATAAC  
GGCAAAGATATGCTGATCATGCTGCACCAAATGGGCAATCACGGGCCTGCGTATTTTAAGCGATATGATGAAAAGTTTGC  
CAAATTCACGCCAGTGTGTGAAGGTAATGAGCTTGCCAAGTGCGAACATCAGTCCTTGATCAATGCTTATGACAATGCCT  
TGCTTGCCACCGATGATTTTCATCGCTCAAAGTATCCAGTGGCTGCAGACGCACAGCAATGCCTATGATGTCTCAATGCTG  
TATGTCAGCGATCATGGCGAAAGTCTGGGTGAGAACGGTGTCTATCTACATGGTATGCCAAATGCCTTTGCACCAAAGA  
ACAGCGCAGTGTGCCTGCATTTTTCTGGACGGATAAGCAAACCTGGCATCACGCCAATGGCAACCGATAACCGTCCTGACCC  
ATGACGCGATCACGCCGACATTAT

>MF134664.1 Escherichia coli strain 1-IM phosphoethanolamine transferase gene, partial cds

CACTTATGGCACGGTCTATGATACGACCATGCTCCAAAATGCCCTACAGACCGACCAAGCCGAGACCAAGGATCTATTAA  
ACGCAGCGTTTATCATGCGTATCATTGGTTTGGGTGTGCTACCAAGTTTGCTTGTGGCTTTTGTTAAGGTGGATTATCCG  
ACTTGGGGCAAGGGTTTGATGCGCCGATTGGGCTTGATCGTGGCAAGTCTTGCGCTGATTTTACTGCCTGTGGTGGCGTT  
CAGCAGTCATTATGCCAGTTTCTTTCGCGTGCATAAGCCGCTGCGTAGCTATGTCAATCCGATCATGCCAATCTACTCGG  
TGGGTAAGCTTGCCAGTATTGAGTATAAAAAAGCCAGTGCGCCAAAAGATAACCATTTATCACGCCAAAGACGCGGTACAA  
GCAACCAAGCCTGATATGCGTAAGCCACGCCTAGTGGTGTTCGTCGTCGGTGAGACGGCACGCGCCGATCATGTCAGCTT  
CAATGGCTATGAGCGCGATACTTTCCACAGCTTGCCAAGATCGATGGCGTGACCAATTTTAGCAATGTCACATCGTGCG  
GCACATCGACGGCGTATTCTGTGCCGTGTATGTTTCAGCTATCTGGGCGCGGATGAGTATGATGTCGATACCGCCAAATAC

CAAGAAAATGTGCTGGATACGCTGGATCGCTTGGGCGTAAGTATCTTGTGGCGTGATAATAATTCGGACTCAAAAGGCGT  
GATGGATAAGCTGCCAAAAGCGCAATTTGCCGATTATAAATCCGCGACCAACAACGCCATCTGCAACACCAATCCTTATA  
ACGAATGCCGCGATGTCGGTATGCTCGTTGGCTTAGATGACTTTGTCGCTGCCAATAACGGCAAAGATATGCTGATCATG  
CTGCACCAAATGGGCAATCACGGGCCTGCGTATTTTAAGCGATATGATGAAAAGTTTGCCAAATTCACGCCAGTGTGTGA  
AGGTAATGAGCTTGCCAAGTGCGAACATCAGTCCTTGATCAATGCTTATGACAATGCCTTGCTTGCCACCGATGATTTCA  
TCGCTCAAAGTATCCAGTGGCTGCAGACGCACAGCAATGCCTATGATGTCTCAATGCTGTATGTCAGCGATCATGGCGAA  
AGTCTGGGTGAGAACGGTGTCTATC

>MG763104.1 Escherichia coli plasmid Mcr-1 (mcr-1) gene, partial cds

CCGTTTGTCTTGTGGCGAGTGTTGCCGTTTTCTTGACCGCGACCGCCAATCTTACCTTTTTTGATAAAATCAGCCAAAC  
CTATCCCATCGCGGACAATCTCGGCTTTGTGCTGACGATCGCTGTCGTGCTCTTTGGCGCGATGCTACTGATCACCACGC  
TGTTATCATCGTATCGCTATGTGCTAAAGCCTGTGTTGATTTTGCTATTAATCATGGGCGCGGTGACCAGTTATTTACT  
GACACTTATGGCACGGTCTATGATACGACCATGCTCCAAAATGCCCTACAGACCGACCAAGCCGAGACCAAGGATCTATT  
AAACGCAGCGTTTATCATGCGTATCATTGGTTTGGGTGTGCTACCAAGTTTGCTTGTGGCTTTTGTTAAGGTGGATTATC  
CGACTTGGGGCAAGGGTTTGATGCGCCGATTGGGCTTGATCGTGGCAAGTCTTGCGCTGATTTTACTGCCTGTGGTGGCG  
TTCAGCAGTCATTATGCCAGTTTCTTTCGCGTGCATAAGCCGCTGCGTAGCTATGTCAATCCGATCATGCCAATCTACTC  
GGTGGGTAAGCTTGCCAGTATTGAGTATAAAAAAGCCAGTGCGCCAAAAGATACCATTATCACGCCAAAGACGCGGTAC  
AAGCAACCAAGCCTGATATGCGTAAGCCACGCCTAGTGGTGTTTCGTCGTGCGTGAGACGGCACGCGCCGATCATGTCAGC  
TTCAATGGCTATGAGCGCGATACTTTCCACAGCTTGCCAAGATCGATGGCGTGACCAATTTTAGCAATGTCACATCGTG  
CGGCACATCGACGGCGTATTCTGTGCCGTGTATGTTTCAGCTATCTGGGCGCGGATGAGTATGATGTCGATACCGCCAAAT

ACCAAGAAAATGTGCTGGATACGCTGGATCGCTTGGGCGTAAGTATCTTGTGGCGTGATAATAATTCGGACTCAAAAGGC  
GTGATGGATAA

>MH425550.1 Escherichia coli strain 298 clone MCR1-3-CLR5-1-F\_H03 polymyxin resistance protein MCR-1 (mcr-1) gene, partial cds

GTTCTTGTGGCGAGTGTGCGGTTTTCTTGACCGCGACCGCCAATCTTACCTTTTTTGATAAAATCAGCCAAACCTATCC  
CATCGCGGACAATCTCGGCTTTGTGCTGACGATCGCTGTCGTGCTCTTTGGCGCGATGCTACTGATCACCACGCTGTTAT  
CATCGTATCGCTATGTGCTAAAGCCTGTGTTGATTTTGCTATTAATCATGGGCGCGGTGACCAGTTATTTTACTGACACT  
TATGGCACGGTCTATGATACGACCATGCTCCAAAATGCCCTACAGACCGACCAAGCCGAGACCAAGGATCTATTAAACGC  
AGCGTTTATCATGCGTATCATTGGTTTGGGTGTGCTACCAAGTTTGCTTGTGGCTTTTGTTAAGGTGGATTATCCGACTT  
GGGGCAAGGGTTTGATGCGCCGATTGGGCTTGATCGTGGCAAGTCTTGCGCTGATTTTACTGCCTGTGGTGGCGTTCAGC  
AGTCATTATGCCAGTTTCTTTCGCGTGCATAAGCCGCTGCGTAGCTATGTCAATCCGATCATGCCAATCTACTCGGTGGG  
TAAGCTTGCCAGTATTGAGTATAAAAAAGCCAGTGCGCCAAAAGATACCATTTATCACGCCAAAGACGCGGTACAAGCAA  
CCAAGCCTGATATGCGTAAGCCACGCCTAGTGGTGTTCGTCGTCGGTGAGACGGCACGCGCCGATCATGTCAGCTTCAAT  
GGCTATGAGCGCGATACTTTCCACAGCTTGCCAAGATCGATGGCGTGACCAATTTTAGCAATGTCACATCGTG

>MN148431.1 Escherichia coli strain RShimy3 MCR family phosphoethanolamine--lipid A transferase (mcr) gene, partial cds

CAGCTATCTGGGCGCGGATGAGTATGATGTCGATACCGACAAATACCAAGAAAATGTGCTGGATACGCTGGATCGCTTGG  
GCGTAAGTATCTTGTGGCGTGATAATAATTCGGACTCAAAAGGCGTGATGGATAAGCTGCCAAAAGCGCAATTTGCCGAT  
TATAAATCCGCGACCAACAACGCCATCTGCAACACCAATCCTTATAACGAATGCCGCGATGTCGGTATGCTCGTTGGCTT  
AGATGACTTTGTCGCTGCCAATAACGGCAAAGATATGCTGATCATGCTGCACCAAATGGGCAATCACGGGCCTGCGTATT  
TTAAGCGATATGATGAAAAGTTTGCCAAATTCACGCCAGTGTGTGAAGGTAATGAGCTTGCCAAGTGCGAACATCAGTCC

TTGATCAATGCTTATGACAATGCCTTGCTTGCCACCGATGATTTTCATCGCTCAAAGTATCCAGTGGCTGCAGACGCACAG  
CAATGCCTATGATGTCTCAATGCTGTATGTCAGCGATCATGGCGAAAGTCTGGGTGAGAACGGTGTCTATCTACATGGTA  
TGCCAAATGCCTTTGCACCAAAGAAGACAGCGCAGTGTGCCTGCATTTTTCTGGACGGATAAGCAAACCTGGCATCACGCCA  
ATGGCAACCGATACCGTCCTGACCCATGACGCGATCACGCCGACATTA

>NG\_051171.1 Escherichia coli KP37 pKP37-BE mcr-2 gene for phosphoethanolamine--lipid A transferase MCR-2.1, complete CDS

ACAGCCCCCTTTATTTATCTGCACAATATATCTAGATTCTACAACGACATTGAAGTATAATCGCCAACTTGTATCGTATAT  
GGCATTGTGGGTAATTTCTATGACATCACATCACTCTTGGTATCGCTATTCTATCAATCCTTTTGTGCTGATGGGTTTG  
GTGGCGTTATTTTTGGCAGCGACAGCGAACCTGACATTTTTTGAAAAAGCGATGGCGGTCTATCCTGTATCGGATAACTT  
AGGCTTTATCATCTCAATGGCGGTGGCGGTGATGGGTGCTATGCTACTGATTGTCGTGCTGTTATCCTATCGCTATGTGC  
TAAAGCCTGTCCTGATTTTGCTACTGATTATGGGTGCGGTGACGAGCTATTTTACCGATACTTATGGCACGGTCTATGAC  
ACCACCATGCTCCAAAATGCCATGCAAACCGACCAAGCCGAGTCTAAGGACTTGATGAATTTGGCGTTTTTTGTGCGAAT  
TATCGGGCTTGGCGTGTTGCCAAGTGTGTTGGTCGCAGTTGCCAAAGTCAATTATCCAACATGGGGCAAAGGTCTGATTC  
AGCGTGCGATGACATGGGGTGTCAGCCTTGTGCTGTTGCTTGTGCCGATTGGACTATTTAGCAGTCAGTATGCGAGTTTC  
TTTCGGGTGCATAAGCCAGTGCGTTTTTATATCAACCCGATTACGCCGATTTATTCGGTGGGTAAGCTTGCCAGTATCGA  
GTACAAAAAAGCCACTGCGCCAACAGACACCATCTATCATGCCAAAGACGCCGTGCAGACCACCAAGCCGAGCGAGCGTA  
AGCCACGCCTAGTGGTGTTCGTCGTCGGTGAGACGGCGCGTGCTGACCATGTGCAGTTCAATGGCTATGGCCGTGAGACT  
TTCCCGCAGCTTGCCAAAGTTGATGGCTTGGCGAATTTTAGCCAAGTGACATCGTGTGGCACATCGACGGCGTATTCTGT  
GCCGTGTATGTTACAGCTATTTGGGTCAAGATGACTATGATGTCGATACCGCCAAATACCAAGAAAATGTGCTAGATACGC  
TTGACCGCTTGGGTGTGGGTATCTTGTGGCGTGATAATAATTCAGACTCAAAGGCGTGATGGATAAGCTACCTGCCACG

CAGTATTTTGATTATAAATCAGCAACCAACAATACCATCTGTAACACCAATCCCTATAACGAATGCCGTGATGTCGGTAT  
GCTTGTCTGGGCTAGATGACTATGTCAGCGCCAATAATGGCAAAGATATGCTCATCATGCTACACCAAATGGGCAATCATG  
GGCCGGCGTACTTTAAGCGTTATGATGAGCAATTTGCCAAATTCACCCCCGTGTGCGAAGGCAACGAGCTTGCCAAATGC  
GAACACCAATCACTCATCAATGCCTATGACAATGCGCTACTTGCGACTGATGATTTTATCGCCAAAAGCATCGATTGGCT  
AAAAACGCATGAAGCGAACTACGATGTCGCCATGCTCTATGTCAGTGACCACGGCGAGAGCTTGGGCGAAAATGGTGTCT  
ATCTGCATGGTATGCCAAATGCCTTTGCACCAAAGAAGACAGCGAGCTGTGCCTGCGTTTTTTTTGGTCAAATAATACGACA  
TTCAAGCCAACTGCCAGCGATACTGTGCTGACGCATGATGCGATTACGCCAACACTGCTTAAGCTGTTTGATGTCACAGC  
GGGCAAGGTCAAAGACCGCGCGGCATTTATCCAGTAAGTTATCATCATAACCCAATCTCAAGCCATCACACTACGGTATC  
GTGTGATGGCGCAGGGCGGATTTTGCAATCTATTTTGCAATGTTTTTTTAGGAATGT

>NG\_065452.1 Escherichia coli ECCTRSRTH05 mcr-2 gene for phosphoethanolamine--lipid A transferase MCR-2.3, complete CDS

TCAAAGTGATCTACTATTCCGAACAGTTATTTAGATTCTACAACGACATTGAAGTATAATCGCCAACTTGTATCGTCTAT  
GGCAATTGCGGGTAACATCTATGACATCACATCACTCTTGGTATCGCTATTCTATCAATCCCTTTGTGCTGATGGGTTTG  
GTGGCGTTATTTTTGGCAGCGACAGCGAACCTGACATTTTTTGAAAAAGCGATGGCGGTCTATCCTGTATCGGATAACTT  
AGGCTTTATCATCTCAATGGCGGTGGCGGTGATGGGTGCTATGCTATTGATTGTTGTGCTATTATCCTATCGCTATGTGC  
TAAAGCCTGTGCTGATTTTGCTGCTTATCATGGGTGCGGTGACGAGCTATTTTACCGATACTTATGGCACGGTCTATGAC  
ACCACCATGCTCCAAAATGCCATGCAAACCGACCAAGCCGAGTCTAAAGACTTGATGAATTTGGCGTTTTTTGTGCGGAT  
TATCGGGCTTGGCGTGTTGCCAAGTCTATTGGTTCGAGTTGCCAAAGTGGGTATCCAACATGGGGCAAAGCCTGATTC  
AGCGTGCGATGACGTGGGGTGTCAGCCTTGTGTTGTTGCTTGTGCCGATTGGGTATTTAGCAGTCAGTATGCGAGTTTC  
TTTCGGGTGCATAAGCCAGTGCGTTTTTATATCAACCCGATTACGCCGATTTATTCGGTGGGTAAGCTTGCCAGTATCGA

GTACAAAAAAGCCACTGCACCAACAGACACCATCTATCATGCCAAAGATGCCGTGCAGACCACCAAGCCTAGCGAGCGTA  
AGCCCCGTCTAGTGGTGTTCGTCGTCGGTGAGACGGCGCGTGCTGACCATGTGCAGTTCAATGGCTATAGCCGTGAGACT  
TTCCCGCAGCTTGCCAAAGTTGATGGCTTGGCGAACTTTAGCCAAGTGACATCGTGTGGCACATCGACGGCGTATTCTGT  
GCCGTGTATGTTTCACTATTTGGGTCAAGATGACTATGATGTGCGATACCGCCAAATACCAAGAAAATGTGCTAGATACGC  
TTGACCGCTTGGGCGTGGGTATCTTGTGGCGTGATAATAATTCAGACTCAAAGGCGTGATGGATAAGCTACCTGCTACG  
CAGTATTTTGATTATAAATCAGCGACCAACAACACCATCTGTAACACCAACCCTTATAATGAATGTCGTGATGTCGGTAT  
GCTTGTGGGCTTGATGACTATGTCAGCGCCAATAATGGCAAAGATATGCTCATCATGCTACACCAAATGGGCAATCATG  
GGCCGGCGTACTTTAAGCGTTATGATGAGCAATTTACCAAATTCACCCCTGTGTGCGAAGGCAACGAGCTTGCCAAATGC  
GAACATCAATCGCTCATCAATGCCTATGATAATGCACTGCTTGCCACCGATGATTTTATCGCCAAAAGTATCGATTGGCT  
AAAAACACATGAAGCAAACCTACGATGTCGCCATGCTCTATGTCAGCGACCACGGCGAGAGCTTGGGCGAAAATGGTGTCT  
ATCTGCATGGTATGCCAAATGCCTTTGCACCAAAAAGAACAACGAGCCGTACCTGTGTTTTTTTGGTCAAATAATACGACA  
TTCAAGCCAACTGCCAGCGATACTGCATTGACCCATGATGCGATTACGCCGACATTGCTTAAGCTGTTTGATGTCACAGC  
TGATAAGGTCAAAGACCGCACGGCATTATCCAGTAAGTTATCAGCATAACCCAATACCGAGCCATCACACTGCATTATC  
GTGTGATGGCAAAGGGTAGATTTGCAACATTTTTTTTGGGCGTAATAGACATTTTTC

>KU323969.1 Escherichia coli strain 235 phosphoethanolamine transferase (mcr-1) gene, partial cds

TGCAGCATACTTCTGTGTGGTACCGACGCTCGGTGAGTCCGTTTGTCTTGTGGCGAGTGTTGCCGTTTTCTTGACCGCG  
ACCGCCAATCTTACCTTTTTTGATAAAATCAGCCAAACCTATCCCATCGCGGACAATCTCGGCTTTGTGCTGACGATCGC  
TGTCGTGCTCTTTGGCGCGATGCTACTGATCACCACGCTGTTATCATCGTATCGCTATGTGCTAAAGCCTGTGTTGATTT  
TGCTATTAATCATGGGCGCGGTGACCAGTATTTTACTGACACTTATGGCACGGTCTATGATACGACCATGCTCCAAAAT



GCCCTACAGACCGACCAAGCCGAGACCAAGGATCTATTAAACGCAGCGTTTATCATGCGTATCATTGGTTTGGGTGTGCT  
ACCAAGTTTGCTTGTGGCTTTTGTTAAGGTGGATTATCCGACTTGGGGCAAGGGTTTGATGCGCCGATTGGGCTTGATCG  
TGGCAAGTCTTGCGCTGATTTTACTGCCTGTGGTGGCGTTCAGCAGTCATTATGCCAGTTTCTTTCGCGTGCATA
